# Supplementary material for: Unravelling the Differential Expression of Potential microRNAs&nbsp;in Bacterial Wilt-resistant and Susceptible Ginger Species
Source: Research Square preprint supplement (doi:10.21203/rs.3.rs-115945/v1), 2020-12-04
Supplement: Supplementary file 1 [file b3cee2b2696245a8be133c16.xlsx]

## Sheet: GINGER
Gene names	No of miRNAs	miRNAs
AMY1.6 AMY3B Os09g0457600 LOC_Os09g28420 B1045B05.10 OsJ_29630	1193	ath-miR399a, ath-miR399a, ath-miR399a, ath-miR399a, ath-miR399a, ath-miR399a, ath-miR399a, ath-miR399b, ath-miR399b, ath-miR399b, ath-miR399b, ath-miR399b, ath-miR399b, ath-miR399c-3p, ath-miR399c-3p, ath-miR399c-3p, ath-miR399c-3p, ath-miR399c-3p, ath-miR399c-3p, ath-miR399d, ath-miR399d, ath-miR399d, ath-miR399d, ath-miR399d, ath-miR399d, ath-miR399d, ath-miR399e, ath-miR399e, ath-miR399e, ath-…
OSR8 Os09g0558100 LOC_Os09g38560 OJ1065_E04.3	321	ath-miR169a-5p, osa-miR169a, ath-miR169b-5p, ath-miR169c, ath-miR169d, ath-miR169e, ath-miR169f-5p, ath-miR169g-5p, ath-miR169h, ath-miR169i, ath-miR169j, ath-miR169k, ath-miR169l, ath-miR169m, ath-miR169n, osa-miR169b, osa-miR169c, osa-miR169d, osa-miR169e, osa-miR169f.1, osa-miR169g, osa-miR169h, osa-miR169i-5p.1, osa-miR169j, osa-miR169k, osa-miR169l, osa-miR169m, osa-miR169n, osa-miR169o, zma…
At2g19210 F27F23.1	320	ath-miR169a-5p, osa-miR169a, ath-miR169b-5p, ath-miR169c, ath-miR169d, ath-miR169e, ath-miR169f-5p, ath-miR169g-5p, ath-miR169h, ath-miR169i, ath-miR169j, ath-miR169k, ath-miR169l, ath-miR169m, ath-miR169n, osa-miR169b, osa-miR169c, osa-miR169d, osa-miR169e, osa-miR169f.1, osa-miR169g, osa-miR169h, osa-miR169i-5p.1, osa-miR169j, osa-miR169k, osa-miR169l, osa-miR169m, osa-miR169n, osa-miR169o, zma…
GATA20 TIFY2B Os06g0698900 LOC_Os06g48534 P0468G03.1 P0545E05.36	305	ath-miR170-3p, ath-miR171a-3p, osa-miR171a, ath-miR169b-5p, ath-miR169c, ath-miR169d, ath-miR169e, ath-miR169f-5p, ath-miR169g-5p, ath-miR171b-3p, ath-miR171c-3p, osa-miR169b, osa-miR169c, osa-miR169d, osa-miR169e, osa-miR171b, osa-miR171c-3p, osa-miR171d-3p, osa-miR171e-3p, osa-miR171f-3p, osa-miR171i-3p, zma-miR171a-3p, zma-miR171b-3p, sbi-miR169b, sbi-miR171b, sbi-miR171d, sbi-miR171a, mtr-miR…
GEX1 At5g55490 MTE17.20	291	ath-miR169a-5p, osa-miR169a, ath-miR169b-5p, ath-miR169c, ath-miR169d, ath-miR169e, ath-miR169f-5p, ath-miR169g-5p, ath-miR169h, ath-miR169i, ath-miR169j, ath-miR169k, ath-miR169l, ath-miR169m, ath-miR169n, osa-miR169b, osa-miR169c, osa-miR169e, osa-miR169f.1, osa-miR169g, osa-miR169h, osa-miR169i-5p.1, osa-miR169j, osa-miR169k, osa-miR169l, osa-miR169m, osa-miR169n, osa-miR169o, zma-miR169a-5p, …
ASE1 GPRAT1 At2g16570 F1P15	290	ath-miR167a-5p, ath-miR167a-5p, ath-miR167b, ath-miR167b, osa-miR167a-5p, osa-miR167a-5p, osa-miR167b, osa-miR167b, osa-miR167c-5p, osa-miR167c-5p, ath-miR167d, ath-miR167d, osa-miR167d-5p, osa-miR167d-5p, osa-miR167e-5p, osa-miR167e-5p, osa-miR167f, osa-miR167f, osa-miR167g, osa-miR167g, osa-miR167h-5p, osa-miR167h-5p, osa-miR167i-5p, osa-miR167i-5p, osa-miR167j, osa-miR167j, zma-miR167a-5p, zma…
SSL10 SS8 At3g57030 F24I3.110	288	ath-miR167a-5p, ath-miR167a-5p, ath-miR167b, ath-miR167b, osa-miR167a-5p, osa-miR167a-5p, osa-miR167b, osa-miR167b, osa-miR167c-5p, osa-miR167c-5p, ath-miR167d, ath-miR167d, osa-miR167d-5p, osa-miR167d-5p, osa-miR167e-5p, osa-miR167e-5p, osa-miR167f, osa-miR167f, osa-miR167g, osa-miR167g, osa-miR167h-5p, osa-miR167h-5p, osa-miR167i-5p, osa-miR167i-5p, osa-miR167j, osa-miR167j, zma-miR167a-5p, zma…
MED4 MED4_1 At5g02850 F9G14.160	252	ath-miR169a-5p, osa-miR169a, ath-miR169b-5p, ath-miR169c, ath-miR169d, ath-miR169e, ath-miR169f-5p, ath-miR169g-5p, ath-miR169h, ath-miR169i, ath-miR169j, ath-miR169k, ath-miR169l, ath-miR169m, ath-miR169n, osa-miR169b, osa-miR169c, osa-miR169d, osa-miR169e, osa-miR169f.1, osa-miR169g, osa-miR169h, osa-miR169i-5p.1, osa-miR169j, osa-miR169k, osa-miR169l, osa-miR169m, zma-miR169a-5p, zma-miR169b-5…
FUC1 At2g28100 F24D13.11	242	ath-miR165a-3p, ath-miR165b, ath-miR166a-3p, ath-miR166b-3p, ath-miR166c, ath-miR166d, ath-miR166e-3p, ath-miR166f, ath-miR166g, osa-miR166a-3p, osa-miR166b-3p, osa-miR166c-3p, osa-miR166d-3p, osa-miR166e-3p, osa-miR166f, osa-miR166k-3p, osa-miR166l-3p, osa-miR166g-3p, osa-miR166h-3p, osa-miR166i-3p, osa-miR166m, osa-miR166j-3p, zma-miR166a-3p, zma-miR166h-3p, zma-miR166e, zma-miR166i-3p, zma-miR…
At2g29900 F6K5.3	232	ath-miR169b-5p, ath-miR169c, ath-miR169d, ath-miR169e, ath-miR169f-5p, ath-miR169g-5p, ath-miR169h, ath-miR169i, ath-miR169j, ath-miR169k, ath-miR169l, ath-miR169m, ath-miR169n, osa-miR169b, osa-miR169c, osa-miR169d, osa-miR169e, osa-miR169f.1, osa-miR169g, osa-miR169h, osa-miR169i-5p.1, osa-miR169j, osa-miR169k, osa-miR169l, osa-miR169m, osa-miR169n, osa-miR169o, sbi-miR169b, sbi-miR169c, sbi-mi…
FLS2 At5g46330 MPL12.13 MPL12.8	218	ath-miR170-3p, ath-miR171a-3p, osa-miR156c-3p, osa-miR156f-3p, osa-miR156g-3p, osa-miR156h-3p, osa-miR171a, ath-miR171b-3p, ath-miR171c-3p, osa-miR156l-3p, osa-miR171b, osa-miR171c-3p, osa-miR171d-3p, osa-miR171e-3p, osa-miR171f-3p, osa-miR171i-3p, zma-miR156d-3p, zma-miR156f-3p, zma-miR156g-3p, zma-miR156a-3p, zma-miR171a-3p, zma-miR171b-3p, sbi-miR171b, sbi-miR171d, sbi-miR171a, mtr-miR171a, zm…
SDI1 At5g48850 K24G6.19	209	ath-miR170-3p, ath-miR171a-3p, osa-miR171a, ath-miR171b-3p, ath-miR171c-3p, osa-miR171b, osa-miR171c-3p, osa-miR171d-3p, osa-miR171e-3p, osa-miR171f-3p, osa-miR171i-3p, zma-miR171a-3p, zma-miR171b-3p, sbi-miR171b, sbi-miR171d, sbi-miR171a, mtr-miR171a, zma-miR171d-3p, zma-miR171f-3p, zma-miR171c-3p, zma-miR171j-3p, zma-miR171e-3p, zma-miR171i-3p, ptc-miR171a-3p, ptc-miR171b, ptc-miR171c, ptc-miR1…
TOM6 At1g49410 F13F21.16	198	ath-miR156a-5p, ath-miR156b-5p, ath-miR156c-5p, ath-miR156d-5p, ath-miR156e, ath-miR156f-5p, osa-miR156a, osa-miR156b-5p, osa-miR156c-5p, osa-miR156d, osa-miR156e, osa-miR156f-5p, osa-miR156g-5p, osa-miR156h-5p, osa-miR156i, osa-miR156j-5p, ath-miR156g, zma-miR156d-5p, zma-miR156f-5p, zma-miR156g-5p, zma-miR156b-5p, zma-miR156c, zma-miR156e-5p, zma-miR156a-5p, zma-miR156h-5p, zma-miR156i-5p, sbi-…
DJA7A DJA7 Os05g0333500 LOC_Os05g26902 OJ1005_D04.16 OsJ_18101 OSJNBa0049D13.2	195	ath-miR160a-5p, ath-miR160a-5p, ath-miR160b, ath-miR160b, ath-miR160c-5p, ath-miR160c-5p, osa-miR160a-5p, osa-miR160a-5p, osa-miR160b-5p, osa-miR160b-5p, osa-miR160c-5p, osa-miR160c-5p, osa-miR160d-5p, osa-miR160d-5p, osa-miR160e-5p, osa-miR160e-5p, zma-miR160a-5p, zma-miR160a-5p, zma-miR160c-5p, zma-miR160c-5p, zma-miR160d-5p, zma-miR160d-5p, zma-miR160b-5p, zma-miR160b-5p, zma-miR160e, zma-miR1…
MOT2 ST5.1 SULTR5.1 At1g80310 F5I6.6	191	ath-miR160a-5p, ath-miR160a-5p, ath-miR160b, ath-miR160b, ath-miR160c-5p, ath-miR160c-5p, osa-miR160a-5p, osa-miR160a-5p, osa-miR160b-5p, osa-miR160b-5p, osa-miR160c-5p, osa-miR160c-5p, osa-miR160d-5p, osa-miR160d-5p, osa-miR160e-5p, osa-miR160e-5p, zma-miR160a-5p, zma-miR160a-5p, zma-miR160c-5p, zma-miR160c-5p, zma-miR160d-5p, zma-miR160d-5p, zma-miR160b-5p, zma-miR160b-5p, zma-miR160e, zma-miR1…
At5g09310 T5E8.110	186	ath-miR167a-5p, ath-miR167b, osa-miR167a-5p, osa-miR167b, osa-miR167c-5p, ath-miR167d, osa-miR167d-5p, osa-miR167e-5p, osa-miR167f, osa-miR167g, osa-miR167h-5p, osa-miR167i-5p, osa-miR167j, osa-miR419, zma-miR156i-3p, zma-miR167a-5p, zma-miR167b-5p, zma-miR167d-5p, zma-miR167c-5p, sbi-miR167a, sbi-miR167b, sbi-miR167d, sbi-miR167f, sbi-miR167g, sbi-miR167e, sbi-miR167c, sof-miR167a, sof-miR167b, …
PR5K At5g38280 MXA21.170	176	ath-miR156a-5p, ath-miR156b-5p, ath-miR156c-5p, ath-miR156d-5p, ath-miR156e, ath-miR156f-5p, osa-miR156a, osa-miR156b-5p, osa-miR156c-5p, osa-miR156d, osa-miR156e, osa-miR156f-5p, osa-miR156g-5p, osa-miR156h-5p, osa-miR156i, osa-miR156j-5p, zma-miR156d-5p, zma-miR156f-5p, zma-miR156g-5p, zma-miR156b-5p, zma-miR156c, zma-miR156e-5p, zma-miR156a-5p, zma-miR156h-5p, zma-miR156i-5p, sbi-miR156a, sbi-…
LBD12 ASL5 At2g30130 T27E13.13	174	ath-miR156a-5p, ath-miR156b-5p, ath-miR156c-5p, ath-miR156d-5p, ath-miR156e, ath-miR156f-5p, osa-miR156a, osa-miR156b-5p, osa-miR156c-5p, osa-miR156d, osa-miR156e, osa-miR156f-5p, osa-miR156g-5p, osa-miR156h-5p, osa-miR156i, osa-miR156j-5p, ath-miR156g, osa-miR156l-5p, zma-miR156d-5p, zma-miR156f-5p, zma-miR156g-5p, zma-miR156b-5p, zma-miR156c, zma-miR156e-5p, zma-miR156a-5p, zma-miR156h-5p, zma-…
APK3 At3g03900 F20H23.5 T11I18.1	174	ath-miR156a-5p, ath-miR156b-5p, ath-miR156c-5p, ath-miR156d-5p, ath-miR156e, ath-miR156f-5p, osa-miR156a, osa-miR156b-5p, osa-miR156c-5p, osa-miR156d, osa-miR156e, osa-miR156f-5p, osa-miR156g-5p, osa-miR156h-5p, osa-miR156i, osa-miR156j-5p, ath-miR156h, zma-miR156d-5p, zma-miR156f-5p, zma-miR156g-5p, zma-miR156b-5p, zma-miR156c, zma-miR156e-5p, zma-miR156a-5p, zma-miR156h-5p, zma-miR156i-5p, sbi-…
MIND1 ARC11 At5g24020 MZF18.10	173	ath-miR156a-5p, ath-miR156b-5p, ath-miR156c-5p, ath-miR156d-5p, ath-miR156e, ath-miR156f-5p, osa-miR156a, osa-miR156b-5p, osa-miR156c-5p, osa-miR156d, osa-miR156e, osa-miR156f-5p, osa-miR156g-5p, osa-miR156h-5p, osa-miR156i, osa-miR156j-5p, zma-miR156d-5p, zma-miR156f-5p, zma-miR156g-5p, zma-miR156b-5p, zma-miR156c, zma-miR156e-5p, zma-miR156a-5p, zma-miR156h-5p, zma-miR156i-5p, sbi-miR156a, sbi-…
SKP2A At1g21410 F24J8.5	173	ath-miR156a-5p, ath-miR156b-5p, ath-miR156c-5p, ath-miR156d-5p, ath-miR156e, ath-miR156f-5p, osa-miR156a, osa-miR156b-5p, osa-miR156c-5p, osa-miR156d, osa-miR156e, osa-miR156f-5p, osa-miR156g-5p, osa-miR156h-5p, osa-miR156i, osa-miR156j-5p, zma-miR156d-5p, zma-miR156f-5p, zma-miR156g-5p, zma-miR156b-5p, zma-miR156c, zma-miR156e-5p, zma-miR156a-5p, zma-miR156h-5p, zma-miR156i-5p, sbi-miR156a, sbi-…
LSM5 SAD1 At5g48870 K24G6.21	173	ath-miR156a-5p, ath-miR156b-5p, ath-miR156c-5p, ath-miR156d-5p, ath-miR156e, ath-miR156f-5p, osa-miR156a, osa-miR156b-5p, osa-miR156c-5p, osa-miR156d, osa-miR156e, osa-miR156f-5p, osa-miR156g-5p, osa-miR156h-5p, osa-miR156i, osa-miR156j-5p, zma-miR156d-5p, zma-miR156f-5p, zma-miR156g-5p, zma-miR156b-5p, zma-miR156c, zma-miR156e-5p, zma-miR156a-5p, zma-miR156h-5p, zma-miR156i-5p, sbi-miR156a, sbi-…
RABC1 RAB18 RAB18-1 At1g43890 F28H19.15 F9C16.3	173	ath-miR156a-5p, ath-miR156b-5p, ath-miR156c-5p, ath-miR156d-5p, ath-miR156e, ath-miR156f-5p, osa-miR156a, osa-miR156b-5p, osa-miR156c-5p, osa-miR156d, osa-miR156e, osa-miR156f-5p, osa-miR156g-5p, osa-miR156h-5p, osa-miR156i, osa-miR156j-5p, zma-miR156d-5p, zma-miR156f-5p, zma-miR156g-5p, zma-miR156b-5p, zma-miR156c, zma-miR156e-5p, zma-miR156a-5p, zma-miR156h-5p, zma-miR156i-5p, sbi-miR156a, sbi-…
RABC1 RAB18 RAB18-1 At1g43890 F28H19.15 F9C16.3	170	ath-miR156a-5p, ath-miR156b-5p, ath-miR156c-5p, ath-miR156d-5p, ath-miR156e, ath-miR156f-5p, osa-miR156a, osa-miR156b-5p, osa-miR156c-5p, osa-miR156d, osa-miR156e, osa-miR156f-5p, osa-miR156g-5p, osa-miR156h-5p, osa-miR156i, osa-miR156j-5p, ath-miR156g, osa-miR156l-5p, zma-miR156d-5p, zma-miR156f-5p, zma-miR156g-5p, zma-miR156b-5p, zma-miR156c, zma-miR156e-5p, zma-miR156a-5p, zma-miR156h-5p, zma-…
ALT3 At1g68260 T22E19.11	167	ath-miR167a-5p, ath-miR167b, osa-miR166c-5p, osa-miR167a-5p, osa-miR167b, osa-miR167c-5p, ath-miR167d, osa-miR167d-5p, osa-miR167e-5p, osa-miR167f, osa-miR167g, osa-miR167h-5p, osa-miR167i-5p, osa-miR167j, zma-miR167a-5p, zma-miR167b-5p, zma-miR167d-5p, zma-miR167c-5p, sbi-miR167a, sbi-miR167b, sbi-miR167d, sbi-miR167f, sbi-miR167g, sbi-miR167e, sbi-miR167c, sof-miR167a, sof-miR167b, gma-miR167a,…
ISU1 ISCU1 At4g22220 T10I14.50	163	ath-miR167a-5p, ath-miR167b, osa-miR166c-5p, osa-miR167a-5p, osa-miR167b, osa-miR167c-5p, ath-miR167d, osa-miR167d-5p, osa-miR167e-5p, osa-miR167f, osa-miR167g, osa-miR167h-5p, osa-miR167i-5p, osa-miR167j, zma-miR167a-5p, zma-miR167b-5p, zma-miR167d-5p, zma-miR167c-5p, sbi-miR167a, sbi-miR167b, sbi-miR167d, sbi-miR167f, sbi-miR167g, sbi-miR167e, sbi-miR167c, sof-miR167a, sof-miR167b, gma-miR167a,…
At3g58530 F14P22.120	160	ath-miR165a-3p, ath-miR165b, ath-miR166a-3p, ath-miR166b-3p, ath-miR166c, ath-miR166d, ath-miR166e-3p, ath-miR166f, ath-miR166g, osa-miR166a-3p, osa-miR166b-3p, osa-miR166c-3p, osa-miR166d-3p, osa-miR166e-3p, osa-miR166f, osa-miR166j-3p, zma-miR166a-3p, mtr-miR166a, gma-miR166a-3p, gma-miR166b, ptc-miR166a, ptc-miR166b, ptc-miR166c, ptc-miR166d, ptc-miR166e, ptc-miR166f, ptc-miR166g, ptc-miR166h,…
At3g58590 F14P22.180	157	ath-miR167a-5p, ath-miR167b, osa-miR167a-5p, osa-miR167b, osa-miR167c-5p, ath-miR167d, ath-miR167c-5p, osa-miR167d-5p, osa-miR167e-5p, osa-miR167f, osa-miR167g, osa-miR167h-5p, osa-miR167i-5p, osa-miR167j, zma-miR167a-5p, zma-miR167b-5p, zma-miR167d-5p, zma-miR167c-5p, sbi-miR167a, sbi-miR167b, sbi-miR167d, sbi-miR167f, sbi-miR167g, sbi-miR167e, sbi-miR167c, sof-miR167a, sof-miR167b, gma-miR167a,…
CDA1 CDD DESZ At2g19570 F3P11	155	ath-miR167a-5p, ath-miR167b, osa-miR167a-5p, osa-miR167b, osa-miR167c-5p, ath-miR167d, ath-miR167c-5p, osa-miR167d-5p, osa-miR167e-5p, osa-miR167f, osa-miR167g, osa-miR167h-5p, osa-miR167i-5p, osa-miR167j, zma-miR167a-5p, zma-miR167b-5p, zma-miR167d-5p, zma-miR167c-5p, sbi-miR167a, sbi-miR167b, sbi-miR167d, sbi-miR167f, sbi-miR167g, sbi-miR167e, sbi-miR167c, sof-miR167a, sof-miR167b, gma-miR167a,…
SCL15 At4g36710 C7A10.650	153	ath-miR167a-5p, ath-miR167b, osa-miR166c-5p, osa-miR167a-5p, osa-miR167b, osa-miR167c-5p, ath-miR167d, osa-miR167d-5p, osa-miR167e-5p, osa-miR167f, osa-miR167g, osa-miR167h-5p, osa-miR167i-5p, osa-miR167j, zma-miR167a-5p, zma-miR167b-5p, zma-miR167d-5p, zma-miR167c-5p, sbi-miR167a, sbi-miR167b, sbi-miR167d, sbi-miR167f, sbi-miR167g, sbi-miR167e, sbi-miR167c, sof-miR167a, sof-miR167b, gma-miR167a,…
BIG1 At4g38200 F20D10.320	152	ath-miR156a-5p, ath-miR156b-5p, ath-miR156c-5p, ath-miR156d-5p, ath-miR156e, ath-miR156f-5p, osa-miR156a, osa-miR156b-5p, osa-miR156c-5p, osa-miR156d, osa-miR156e, osa-miR156f-5p, osa-miR156g-5p, osa-miR156h-5p, osa-miR156i, osa-miR156j-5p, ath-miR156g, zma-miR156d-5p, zma-miR156f-5p, zma-miR156g-5p, zma-miR156b-5p, zma-miR156c, zma-miR156e-5p, zma-miR156a-5p, zma-miR156h-5p, zma-miR156i-5p, sbi-…
S1FA2 Os04g0408700 LOC_Os04g33440 OsJ_14704 OSJNBa0042I15.16	150	ath-miR172a, ath-miR172b-3p, ath-miR172c, ath-miR172d-3p, ath-miR172e-3p, osa-miR172a, osa-miR172b, osa-miR172c, osa-miR172d-3p, zma-miR172a, zma-miR172d-3p, zma-miR172b-3p, zma-miR172c-3p, sbi-miR172b, sbi-miR172c, sbi-miR172a, sbi-miR172e, gma-miR172a, gma-miR172b-3p, zma-miR172e, ptc-miR172a, ptc-miR172b-3p, ptc-miR172c, ptc-miR172d, ptc-miR172e, ptc-miR172f, ptc-miR172g-3p, ptc-miR172h-3p, pt…
CBP60B At5g57580 MUA2.16	147	ath-miR172a, ath-miR172b-3p, ath-miR172c, ath-miR172d-3p, ath-miR172e-3p, osa-miR172a, osa-miR172b, osa-miR172c, osa-miR172d-3p, zma-miR172a, zma-miR172d-3p, zma-miR172b-3p, zma-miR172c-3p, sbi-miR172b, sbi-miR172c, sbi-miR172a, sbi-miR172e, gma-miR172a, gma-miR172b-3p, zma-miR172e, ptc-miR172a, ptc-miR172b-3p, ptc-miR172c, ptc-miR172d, ptc-miR172e, ptc-miR172f, ptc-miR172g-3p, ptc-miR172h-3p, pt…
UGT72B3 At1g01420 F6F3.22	140	ath-miR172a, ath-miR172b-3p, ath-miR172c, ath-miR172d-3p, ath-miR172e-3p, osa-miR172a, osa-miR172b, osa-miR172c, osa-miR172d-3p, zma-miR172a, zma-miR172d-3p, zma-miR172b-3p, zma-miR172c-3p, sbi-miR172b, sbi-miR172c, sbi-miR172a, sbi-miR172e, gma-miR172a, gma-miR172b-3p, zma-miR172e, ptc-miR160g, ptc-miR172a, ptc-miR172b-3p, ptc-miR172c, ptc-miR172d, ptc-miR172e, ptc-miR172f, ptc-miR172g-3p, ptc-m…
SP1L5 At4g23496 F16G20	140	ath-miR172a, ath-miR172b-3p, ath-miR172c, ath-miR172d-3p, ath-miR172e-3p, osa-miR172a, osa-miR172b, osa-miR172c, osa-miR172d-3p, zma-miR172a, zma-miR172d-3p, zma-miR172b-3p, zma-miR172c-3p, sbi-miR172b, sbi-miR172c, sbi-miR172a, sbi-miR172e, gma-miR172a, gma-miR172b-3p, zma-miR172e, ptc-miR160g, ptc-miR172a, ptc-miR172b-3p, ptc-miR172c, ptc-miR172d, ptc-miR172e, ptc-miR172f, ptc-miR172g-3p, ptc-m…
ROS1A ROS1 TA2 Os01g0218032 LOC_Os01g11900	134	ath-miR159a, ath-miR166e-5p, ath-miR159b-3p, ath-miR394a, ath-miR394b-5p, osa-miR394, ath-miR159c, osa-miR159a.1, osa-miR159b, osa-miR171g, osa-miR171h, osa-miR415, sbi-miR394a, sbi-miR171c, sbi-miR171e, sbi-miR159a, sof-miR159a, sof-miR159b, sof-miR159d, sof-miR159e, gma-miR159a-3p, zma-miR394a-5p, zma-miR394b-5p, zma-miR159a-3p, zma-miR159b-3p, zma-miR171g-3p, zma-miR171k-3p, zma-miR171h-3p, sb…
GIF1 AN3 MKB3 Os03g0733600 LOC_Os03g52320 OSJNBa0027J18.22 OSJNBa0079G12.3	131	ath-miR160a-5p, ath-miR160b, ath-miR160c-5p, osa-miR160a-5p, osa-miR160b-5p, osa-miR160c-5p, osa-miR160d-5p, osa-miR160e-5p, osa-miR160f-5p, zma-miR160a-5p, zma-miR160c-5p, zma-miR160d-5p, zma-miR160b-5p, zma-miR160e, sbi-miR160d, sbi-miR160a, sbi-miR160c, sbi-miR160b, sbi-miR160e, mtr-miR160a, gma-miR160a-5p, zma-miR160f-5p, ptc-miR160a, ptc-miR160b-5p, ptc-miR160c-5p, ptc-miR160d, ptc-miR160e-5…
DUT Os03g0669100 LOC_Os03g46640 OSJNBa0039O18.10	129	ath-miR159a, ath-miR319a, ath-miR319b, ath-miR159c, osa-miR159a.1, osa-miR159b, sbi-miR159a, mtr-miR319a-3p, sof-miR159a, sof-miR159b, sof-miR159d, gma-miR159a-3p, gma-miR319a, gma-miR319b, zma-miR159a-3p, zma-miR159b-3p, ptc-miR159a, ptc-miR159b, ptc-miR160h, ptc-miR319a, ptc-miR319b, ptc-miR319c, ptc-miR319d, ptc-miR319e, ptc-miR319f, ptc-miR319g, ptc-miR319h, ptc-miR319i, ppt-miR319a, ppt-miR3…
At1g27930 F13K9.4	125	ath-miR169b-5p, ath-miR169c, ath-miR169d, ath-miR169e, ath-miR169f-5p, ath-miR169g-5p, osa-miR169b, osa-miR169c, osa-miR169e, osa-miR169n, osa-miR169o, sbi-miR169b, sbi-miR169i, gma-miR169a, zma-miR169c-5p, ptc-miR169aa, ptc-miR169d, ptc-miR169e, ptc-miR169f, ptc-miR169g, ptc-miR169h, ptc-miR169n-5p, ptc-miR169o, ptc-miR169p, ptc-miR169t, ptc-miR169z, mtr-miR169d-5p, mtr-miR169e-5p, mtr-miR169f, …
	125	ath-miR172a, ath-miR172b-3p, ath-miR172e-3p, osa-miR172a, osa-miR172b, osa-miR172d-3p, ath-miR426, zma-miR172a, zma-miR172d-3p, zma-miR172b-3p, zma-miR172c-3p, sbi-miR172c, sbi-miR172a, gma-miR172a, gma-miR172b-3p, zma-miR172e, ptc-miR172a, ptc-miR172b-3p, ptc-miR172c, ptc-miR172d, ptc-miR172e, ptc-miR172f, ptc-miR396g-3p, ptc-miR481d, ath-miR846-3p, mtr-miR172a, smo-miR1112-5p, vvi-miR172d, gma-…
	121	ath-miR160a-5p, ath-miR160b, ath-miR160c-5p, osa-miR160a-5p, osa-miR160b-5p, osa-miR160c-5p, osa-miR160d-5p, osa-miR160e-5p, zma-miR160a-5p, zma-miR160c-5p, zma-miR160d-5p, zma-miR160b-5p, zma-miR164c-3p, zma-miR160e, sbi-miR160d, sbi-miR160a, sbi-miR160c, sbi-miR160b, sbi-miR160e, mtr-miR160a, gma-miR160a-5p, zma-miR160f-5p, ptc-miR160a, ptc-miR160b-5p, ptc-miR160c-5p, ptc-miR160d, ptc-miR160h, …
SBT3.8 At4g10540 F3H7.2 F7L13.120	121	ath-miR396a-5p, ath-miR396b-5p, osa-miR396a-5p, osa-miR396b-5p, osa-miR396c-5p, sbi-miR396b, sbi-miR396a, sbi-miR396c, sof-miR396, gma-miR396a-5p, gma-miR396b-5p, zma-miR396b-5p, zma-miR396a-5p, ptc-miR396a, ptc-miR396b, ptc-miR396c, ptc-miR396d, ptc-miR396e-5p, ptc-miR396f, ptc-miR396g-5p, mtr-miR396a-5p, mtr-miR396b-5p, ghr-miR396a, ghr-miR396b, bna-miR396a, pta-miR396, ppt-miR1067, smo-miR396,…
At1g62910 F16P17.5	120	ath-miR169h, ath-miR169i, ath-miR169j, ath-miR169k, ath-miR169l, ath-miR169m, ath-miR169n, osa-miR169f.1, osa-miR169g, osa-miR169h, osa-miR169i-5p.1, osa-miR169j, osa-miR169k, osa-miR169l, osa-miR169m, osa-miR169n, osa-miR169o, sbi-miR169c, sbi-miR169d-5p, sbi-miR169f, sbi-miR169g, sbi-miR169i, zma-miR159a-5p, zma-miR169f-5p, zma-miR169g, zma-miR169h, zma-miR169i-5p, zma-miR169k-5p, zma-miR169j-5…
OPT4 At5g64410 MSJ1.25	118	ath-miR396a-5p, ath-miR396b-5p, osa-miR396a-5p, osa-miR396b-5p, osa-miR396c-5p, sbi-miR396b, sbi-miR396a, sbi-miR396c, sof-miR396, gma-miR396a-5p, gma-miR396b-5p, zma-miR396b-5p, zma-miR396a-5p, ptc-miR396a, ptc-miR396b, ptc-miR396c, ptc-miR396d, ptc-miR396e-5p, ptc-miR396f, ptc-miR396g-5p, mtr-miR396a-5p, mtr-miR396b-5p, ghr-miR396a, ghr-miR396b, bna-miR396a, pta-miR396, smo-miR396, vvi-miR396a,…
NEET At5g51720 MIO24.14	117	ath-miR169b-5p, ath-miR169c, osa-miR169b, osa-miR169c, osa-miR169d, osa-miR169e, sbi-miR169b, sbi-miR169c, sbi-miR169d-5p, gma-miR169a, zma-miR169c-5p, ptc-miR169d, ptc-miR169e, ptc-miR169f, ptc-miR169g, ptc-miR169h, ptc-miR169p, ptc-miR169v, ptc-miR169w, ptc-miR169z, mtr-miR169c, mtr-miR169d-5p, mtr-miR169e-5p, mtr-miR169g, mtr-miR169b, vvi-miR169a, vvi-miR169c, vvi-miR169d, vvi-miR169j, vvi-miR…
VPS15 At4g29380 F17A13.200	117	ath-miR169b-5p, ath-miR169c, osa-miR169b, osa-miR169c, osa-miR169d, osa-miR169e, sbi-miR169b, sbi-miR169c, sbi-miR169d-5p, gma-miR169a, zma-miR169c-5p, ptc-miR169d, ptc-miR169e, ptc-miR169f, ptc-miR169g, ptc-miR169h, ptc-miR169p, ptc-miR169v, ptc-miR169w, ptc-miR169z, mtr-miR169c, mtr-miR169d-5p, mtr-miR169e-5p, mtr-miR169g, mtr-miR169b, vvi-miR169a, vvi-miR169c, vvi-miR169d, vvi-miR169j, vvi-miR…
Os02g0642300 LOC_Os02g42890 OJ1112_G03.14 OsJ_07691	117	ath-miR169h, ath-miR169i, ath-miR169j, ath-miR169k, ath-miR169l, ath-miR169m, ath-miR169n, osa-miR169f.1, osa-miR169g, osa-miR169h, osa-miR169i-5p.1, osa-miR169j, osa-miR169k, osa-miR169l, osa-miR169m, osa-miR169n, osa-miR169o, sbi-miR169c, sbi-miR169d-5p, sbi-miR169f, sbi-miR169g, sbi-miR169i, zma-miR159a-5p, zma-miR169f-5p, zma-miR169g, zma-miR169h, zma-miR169i-5p, zma-miR169k-5p, zma-miR169j-5…
MSL10 At5g12080 F14F18.230 MXC9.3	114	ath-miR167a-5p, ath-miR167b, osa-miR167a-5p, osa-miR167b, osa-miR167c-5p, zma-miR167a-5p, zma-miR167b-5p, zma-miR167d-5p, zma-miR167c-5p, sbi-miR167a, sbi-miR167b, gma-miR167a, gma-miR167b, ptc-miR167a, ptc-miR167b, ptc-miR167c, ptc-miR167d, ptc-miR167h-5p, ath-miR838, ath-miR870-3p, mtr-miR167a, cre-miR910, tae-miR167a, bna-miR167a, bna-miR167b, bna-miR167c, vvi-miR167b, vvi-miR167d, vvi-miR167e…
POX2 PRODH2 At5g38710 MKD10.10	112	ath-miR170-5p, ath-miR171a-5p, ath-miR398b-5p, ath-miR398c-5p, osa-miR171f-5p, ptc-miR475c, ppt-miR537b, osa-miR818a, osa-miR818b, osa-miR818c, osa-miR818d, osa-miR818e, ppt-miR893, ppt-miR1026a, ppt-miR1026b, ppt-miR1057, ptc-miR1445, gma-miR390b-3p, gma-miR1536, gma-miR1532, ath-miR2111a-5p, ath-miR2111b-5p, bna-miR2111b-5p, bna-miR2111a-5p, mtr-miR2111c, mtr-miR2111d-5p, mtr-miR2111e-5p, mtr-m…
COMT	111	ath-miR164a, ath-miR164b-5p, osa-miR164a, osa-miR164b, ath-miR164c-5p, osa-miR164c, osa-miR164d, osa-miR164e, osa-miR164f, zma-miR164a-5p, zma-miR164d-5p, zma-miR164b-5p, zma-miR164c-5p, sbi-miR164a, sbi-miR164b, sbi-miR164c, ptc-miR164a, ptc-miR164b, ptc-miR164c, ptc-miR164d, ptc-miR164e, ptc-miR164f, mtr-miR164a, mtr-miR164b, mtr-miR164c, mtr-miR164d, tae-miR164, bna-miR164a, vvi-miR164a, vvi-m…
HSP21 HSP25.3 At4g27670 T29A15.160	111	ath-miR167a-5p, ath-miR167b, osa-miR167a-5p, osa-miR167b, osa-miR167c-5p, zma-miR167a-5p, zma-miR167b-5p, zma-miR167d-5p, zma-miR167c-5p, sbi-miR167a, sbi-miR167b, gma-miR167a, gma-miR167b, ptc-miR167a, ptc-miR167b, ptc-miR167c, ptc-miR167d, ptc-miR167h-5p, ath-miR838, ath-miR870-3p, mtr-miR167a, cre-miR910, tae-miR167a, bna-miR167a, bna-miR167b, bna-miR167c, vvi-miR167b, vvi-miR167d, vvi-miR167e…
AFR SKIP29 At2g24540 F25P17.16	110	ath-miR319a, ath-miR319b, ath-miR159c, ath-miR319c, osa-miR159c, osa-miR159d, osa-miR159e, osa-miR319a-3p.2-3p, osa-miR319b, sbi-miR319a, mtr-miR319a-3p, sof-miR159c, gma-miR319a, gma-miR319b, zma-miR159c-3p, zma-miR159d-3p, zma-miR319a-3p, zma-miR319c-3p, zma-miR319b-3p, zma-miR319d-3p, sbi-miR159b, ptc-miR159d, ptc-miR319a, ptc-miR319b, ptc-miR319c, ptc-miR319d, ptc-miR319e, ptc-miR319f, ptc-mi…
RL6 RSM3 At1g75250 F22H5.3	109	ath-miR160a-5p, ath-miR160b, ath-miR160c-5p, osa-miR160a-5p, osa-miR160b-5p, osa-miR160c-5p, osa-miR160d-5p, osa-miR160e-5p, zma-miR160a-5p, zma-miR160c-5p, zma-miR160d-5p, zma-miR160b-5p, zma-miR160e, sbi-miR160d, sbi-miR160a, sbi-miR160c, sbi-miR160b, sbi-miR160e, mtr-miR160a, gma-miR160a-5p, zma-miR160f-5p, ptc-miR160a, ptc-miR160b-5p, ptc-miR160c-5p, ptc-miR160d, ptc-miR160h, mtr-miR160b, mtr…
Os10g0513300 LOC_Os10g36950 OsJ_030878 OSJNBa0026L12.27	108	ath-miR160a-5p, ath-miR160b, ath-miR160c-5p, osa-miR160a-5p, osa-miR160b-5p, osa-miR160c-5p, osa-miR160d-5p, osa-miR160e-5p, zma-miR160a-5p, zma-miR160c-5p, zma-miR160d-5p, zma-miR160b-5p, zma-miR160e, sbi-miR160d, sbi-miR160a, sbi-miR160c, sbi-miR160b, sbi-miR160e, mtr-miR160a, gma-miR160a-5p, zma-miR160f-5p, ptc-miR160a, ptc-miR160b-5p, ptc-miR160c-5p, ptc-miR160d, ptc-miR160h, mtr-miR160b, mtr…
PII-2 At1g13230 F3F19.26	106	ath-miR159a, ath-miR159b-3p, ath-miR394a, ath-miR394b-5p, osa-miR394, ath-miR159c, osa-miR159a.1, osa-miR159b, osa-miR415, sbi-miR394a, sbi-miR159a, sof-miR159a, sof-miR159b, sof-miR159d, sof-miR159e, gma-miR159a-3p, zma-miR394a-5p, zma-miR394b-5p, zma-miR159a-3p, zma-miR159b-3p, ptc-miR159a, ptc-miR159b, ptc-miR394a-5p, ptc-miR394b-5p, pta-miR949, tae-miR159a, tae-miR159b, bna-miR159, vvi-miR159…
CD4A	105	ath-miR160a-5p, ath-miR160b, ath-miR160c-5p, osa-miR160a-5p, osa-miR160b-5p, osa-miR160c-5p, osa-miR160d-5p, osa-miR160e-5p, zma-miR160a-5p, zma-miR160c-5p, zma-miR160d-5p, zma-miR160b-5p, zma-miR160e, sbi-miR160d, sbi-miR160a, sbi-miR160c, sbi-miR160b, sbi-miR160e, mtr-miR160a, gma-miR160a-5p, zma-miR160f-5p, ptc-miR160a, ptc-miR160b-5p, ptc-miR160c-5p, ptc-miR160d, ptc-miR160h, mtr-miR160b, mtr…
BDG4 At5g17780 MVA3.14	102	ath-miR160a-5p, ath-miR160b, ath-miR160c-5p, osa-miR160a-5p, osa-miR160b-5p, osa-miR160c-5p, osa-miR160d-5p, osa-miR160e-5p, zma-miR160a-5p, zma-miR160c-5p, zma-miR160d-5p, zma-miR160b-5p, zma-miR160e, sbi-miR160d, sbi-miR160a, sbi-miR160c, sbi-miR160b, sbi-miR160e, mtr-miR160a, gma-miR160a-5p, zma-miR160f-5p, ptc-miR160a, ptc-miR160b-5p, ptc-miR160c-5p, ptc-miR160d, ath-miR825, mtr-miR160b, mtr-…
ABCC13 MRP11 MRP13 At2g07680 T5E7.1	101	ath-miR160a-5p, ath-miR160b, ath-miR160c-5p, osa-miR160a-5p, osa-miR160b-5p, osa-miR160c-5p, osa-miR160d-5p, osa-miR160e-5p, zma-miR160a-5p, zma-miR160c-5p, zma-miR160d-5p, zma-miR160b-5p, zma-miR160e, sbi-miR160d, sbi-miR160a, sbi-miR160c, sbi-miR160b, sbi-miR160e, mtr-miR160a, gma-miR160a-5p, zma-miR160f-5p, ptc-miR160a, ptc-miR160b-5p, ptc-miR160c-5p, ptc-miR160d, mtr-miR160b, mtr-miR160d, mtr…
PEX7 At1g29260 F28N24.6	100	ath-miR159b-3p, ath-miR319a, ath-miR319b, ath-miR319c, osa-miR159f, mtr-miR319a-3p, sof-miR159c, gma-miR319a, gma-miR319b, zma-miR159c-3p, zma-miR159d-3p, sbi-miR159b, ptc-miR159d, ptc-miR319a, ptc-miR319b, ptc-miR319c, ptc-miR319d, ptc-miR319e, ptc-miR319f, ptc-miR319g, ptc-miR319h, ppt-miR319a, ppt-miR319b, ppt-miR319c, ppt-miR319d-3p, mtr-miR319b-3p, ppt-miR319e, pta-miR159b, pta-miR159c, pta-…
PDR2	99	ath-miR160a-5p, ath-miR160b, ath-miR160c-5p, osa-miR160a-5p, osa-miR160b-5p, osa-miR160c-5p, osa-miR160d-5p, osa-miR160e-5p, zma-miR160a-5p, zma-miR160c-5p, zma-miR160d-5p, zma-miR160b-5p, zma-miR160e, sbi-miR160d, sbi-miR160a, sbi-miR160c, sbi-miR160b, sbi-miR160e, mtr-miR160a, gma-miR160a-5p, zma-miR160f-5p, ptc-miR160a, ptc-miR160b-5p, ptc-miR160c-5p, ptc-miR160d, mtr-miR160b, mtr-miR160d, mtr…
MHF1 At5g50930 K3K7.8	99	ath-miR160a-5p, ath-miR160b, ath-miR160c-5p, osa-miR160a-5p, osa-miR160b-5p, osa-miR160c-5p, osa-miR160d-5p, osa-miR160e-5p, zma-miR160a-5p, zma-miR160c-5p, zma-miR160d-5p, zma-miR160b-5p, zma-miR160e, sbi-miR160d, sbi-miR160a, sbi-miR160c, sbi-miR160b, sbi-miR160e, mtr-miR160a, gma-miR160a-5p, zma-miR160f-5p, ptc-miR160a, ptc-miR160b-5p, ptc-miR160c-5p, ptc-miR160d, mtr-miR160b, mtr-miR160d, mtr…
TCEA1 TCEA5	99	ath-miR160a-5p, ath-miR160b, ath-miR160c-5p, osa-miR160a-5p, osa-miR160b-5p, osa-miR160c-5p, osa-miR160d-5p, osa-miR160e-5p, zma-miR160a-5p, zma-miR160c-5p, zma-miR160d-5p, zma-miR160b-5p, zma-miR160e, sbi-miR160d, sbi-miR160a, sbi-miR160c, sbi-miR160b, sbi-miR160e, mtr-miR160a, gma-miR160a-5p, zma-miR160f-5p, ptc-miR160a, ptc-miR160b-5p, ptc-miR160c-5p, ptc-miR160d, ath-miR842, mtr-miR160b, mtr-…
IAN9 At1g33970 F12G12.21 T15K4.2 T3M13.1	99	ath-miR160a-5p, ath-miR160b, ath-miR160c-5p, osa-miR160a-5p, osa-miR160b-5p, osa-miR160c-5p, osa-miR160d-5p, osa-miR160e-5p, zma-miR160a-5p, zma-miR160c-5p, zma-miR160d-5p, zma-miR160b-5p, zma-miR160e, sbi-miR160d, sbi-miR160a, sbi-miR160c, sbi-miR160b, sbi-miR160e, mtr-miR160a, gma-miR160a-5p, zma-miR160f-5p, ptc-miR160a, ptc-miR160b-5p, ptc-miR160c-5p, ptc-miR160d, ath-miR842, mtr-miR160b, mtr-…
CXE8 At2g45600 17K2.13	98	ath-miR159a, ath-miR159b-3p, ath-miR159c, ath-miR319c, osa-miR159a.1, osa-miR159b, osa-miR159c, osa-miR159d, osa-miR159e, osa-miR159f, sbi-miR159a, sof-miR159a, sof-miR159b, sof-miR159d, sof-miR159c, gma-miR159a-3p, zma-miR159a-3p, zma-miR159b-3p, zma-miR159c-3p, zma-miR159d-3p, sbi-miR159b, ptc-miR159a, ptc-miR159b, ptc-miR159d, ptc-miR159e, ptc-miR319e, ptc-miR319f, ptc-miR319g, ptc-miR319h, pp…
FKBP15-1 At3g25220 MJL12.17	93	osa-miR171b, osa-miR171c-3p, osa-miR171d-3p, osa-miR171e-3p, osa-miR171f-3p, sbi-miR171b, sbi-miR171d, sbi-miR171a, zma-miR171d-3p, zma-miR171c-3p, zma-miR171j-3p, zma-miR171e-3p, zma-miR171i-3p, ptc-miR171e, ptc-miR171f, ptc-miR171g-3p, ptc-miR171h-3p, ptc-miR171i, ptc-miR393b-3p, mtr-miR171c, mtr-miR393b-3p, mtr-miR171d, tae-miR171a, vvi-miR171a, vvi-miR171c, vvi-miR171d, vvi-miR171i, sly-miR17…
UPL2 At1g70320 F17O7.14/F17O7.15	93	ath-miR396a-5p, ath-miR396b-5p, osa-miR396a-5p, osa-miR396b-5p, osa-miR396c-5p, sbi-miR396b, sbi-miR396a, sbi-miR396c, sof-miR396, gma-miR396a-5p, gma-miR396b-5p, zma-miR396b-5p, zma-miR396a-5p, ptc-miR396a, ptc-miR396b, ptc-miR396c, ptc-miR396d, ptc-miR396e-5p, mtr-miR396a-5p, mtr-miR396b-5p, ghr-miR396a, ghr-miR396b, bna-miR396a, pta-miR396, smo-miR396, cre-miR1157-5p, vvi-miR396a, vvi-miR396b,…
At2g15980 F19G14.2	91	ath-miR164a, ath-miR164b-5p, osa-miR164a, osa-miR164b, ath-miR164c-5p, osa-miR164d, osa-miR164f, zma-miR164a-5p, zma-miR164d-5p, zma-miR164b-5p, zma-miR164c-5p, sbi-miR164a, sbi-miR164b, ptc-miR164a, ptc-miR164b, ptc-miR164c, ptc-miR164d, ptc-miR164e, mtr-miR164a, mtr-miR164b, mtr-miR164c, ppt-miR1077-3p, tae-miR164, bna-miR164a, vvi-miR164a, vvi-miR164c, vvi-miR164d, gma-miR164a, bra-miR164a, sb…
	91	osa-miR395b, osa-miR395d, osa-miR395e, osa-miR395g, osa-miR395h, osa-miR395i, osa-miR395j, osa-miR395k, osa-miR395l, osa-miR395s, osa-miR395c, osa-miR395u, sbi-miR395b, sbi-miR395a, sbi-miR395d, sbi-miR395e, zma-miR395b-3p, zma-miR395c-3p, zma-miR395a-3p, mtr-miR395k, osa-miR395m, osa-miR395n, osa-miR395p, osa-miR395q, osa-miR395w, osa-miR395r, ath-miR863-5p, ppt-miR395, osa-miR1428e-5p, aqu-miR-…
	91	ath-miR319a, ath-miR319b, ath-miR403-5p, mtr-miR319a-3p, gma-miR319a, gma-miR319b, gma-miR319c, ptc-miR319a, ptc-miR319b, ptc-miR319c, ptc-miR319d, ptc-miR319e, ptc-miR319f, ptc-miR319g, ptc-miR319h, ppt-miR319a, ppt-miR319b, ppt-miR319c, ppt-miR319d-3p, mtr-miR319b-3p, ppt-miR319e, pta-miR319, vvi-miR319b, vvi-miR319c, vvi-miR319f, vvi-miR319g, vvi-miR319e, sly-miR319a, mtr-miR1507-5p, osa-miR21…
CEBIP Os03g0133400 LOC_Os03g04110 OJ1006F06.19 OsJ_30068	90	ath-miR319a, ath-miR319b, ath-miR319c, mtr-miR319a-3p, gma-miR319a, gma-miR319b, gma-miR319c, ptc-miR319a, ptc-miR319b, ptc-miR319c, ptc-miR319d, ptc-miR319e, ptc-miR319f, ptc-miR319g, ptc-miR319h, ptc-miR319i, ppt-miR319a, ppt-miR319b, ppt-miR319c, ppt-miR319d-3p, mtr-miR319b-3p, ppt-miR319e, pta-miR319, vvi-miR319b, vvi-miR319c, vvi-miR319f, vvi-miR319g, vvi-miR319e, sly-miR319a, mtr-miR1510b-3…
RSH1 Os03g0340900 LOC_Os03g22160 OsJ_10786	89	ath-miR157a-5p, ath-miR157b-5p, ath-miR157c-5p, ath-miR157d, ath-miR408-5p, gma-miR156d, gma-miR156e, gma-miR156c, ptc-miR156g, ptc-miR156h, ptc-miR156i, ptc-miR156j, ptc-miR408-5p, mtr-miR156e, mtr-miR156f, mtr-miR156g-5p, mtr-miR156h-5p, gra-miR157a, gra-miR157b, pta-miR156a, pta-miR156b, smo-miR156b, bna-miR156b, bna-miR156c, vvi-miR156f, vvi-miR156g, vvi-miR156i, osa-miR1849, sly-miR156a, sly…
At3g26560 MFE16.8	89	osa-miR171b, osa-miR171c-3p, osa-miR171d-3p, osa-miR171e-3p, osa-miR171f-3p, sbi-miR171b, sbi-miR171d, sbi-miR171a, zma-miR171d-3p, zma-miR171j-3p, zma-miR171e-3p, zma-miR171i-3p, ptc-miR171e, ptc-miR171f, ptc-miR171g-3p, ptc-miR171h-3p, ptc-miR171i, ptc-miR473a-3p, ppt-miR1218, mtr-miR171c, mtr-miR171d, ppt-miR1039-5p, tae-miR171a, vvi-miR171a, vvi-miR171c, vvi-miR171d, vvi-miR171i, gma-miR1507a…
At3g26560 MFE16.8	82	ptc-miR172b-5p, ptc-miR172g-5p, ptc-miR472a, pta-miR482a, pta-miR482b, pta-miR482c, gma-miR482a-3p, gma-miR1507a, osa-miR1859, mtr-miR1507-3p, gma-miR1507b, vun-miR1507a, pvu-miR482-3p, vun-miR1507b, osa-miR2118a, osa-miR2118b, osa-miR2118c, osa-miR2118d, osa-miR2118e, osa-miR2118f, osa-miR2118g, osa-miR2118h, osa-miR2118i, osa-miR2118j, osa-miR2118k, osa-miR2118l, osa-miR2118m, osa-miR2118n, osa…
LSM1B At3g14080 MAG2.4	82	ath-miR393a-5p, ath-miR393b-5p, osa-miR393a, osa-miR393b-5p, sbi-miR393a, mtr-miR393a, zma-miR393a-5p, ptc-miR393a-5p, ptc-miR393b-5p, ptc-miR393c, ath-miR846-5p, mtr-miR393b-5p, ppt-miR477f, ppt-miR477g-5p, bna-miR393, vvi-miR393b, gma-miR393a, vvi-miR393a, sbi-miR393b, mtr-miR2659a, mtr-miR2659b, mtr-miR2659c, mtr-miR2659d, mtr-miR2659e, mtr-miR2659f, zma-miR393b-5p, zma-miR393c-5p, rco-miR393,…
CYB561B ACYB-1 CYB-1 CYB561B2 CYBASC2 CYTB561 At5g38630 MBB18.18	79	ath-miR167a-5p, ath-miR167b, osa-miR167a-5p, osa-miR167b, osa-miR167c-5p, ath-miR167d, zma-miR167a-5p, zma-miR167b-5p, zma-miR167d-5p, zma-miR167c-5p, sbi-miR167a, sbi-miR167b, gma-miR167a, gma-miR167b, ptc-miR167a, ptc-miR167b, ptc-miR167c, ptc-miR167d, mtr-miR167a, tae-miR167a, bna-miR167a, bna-miR167b, bna-miR167c, vvi-miR167b, vvi-miR167d, vvi-miR167e, sly-miR167a, gma-miR167d, bra-miR167a, b…
ERG1 Os01g0841700 LOC_Os01g62430 OsJ_04036 P0406G08	78	ath-miR166e-5p, ath-miR390a-5p, ath-miR390b-5p, osa-miR390-5p, ptc-miR390a, ptc-miR390b, ptc-miR390c, ptc-miR390d-5p, ppt-miR390a, ppt-miR390b, mtr-miR390, ghr-miR390a, ghr-miR390b, ghr-miR390c, tae-miR1119, bna-miR390a, bna-miR390b, bna-miR390c, vvi-miR390, gma-miR390a-5p, gma-miR390b-5p, gma-miR1512a-5p, sbi-miR390, zma-miR390a-5p, zma-miR390b-5p, csi-miR390, rco-miR390a, rco-miR390b, aly-miR15…
5FCL At5g13050 T19L5.10	78	osa-miR319a-5p, ath-miR413, ath-miR417, ath-miR426, osa-miR435, ptc-miR171a-5p, ptc-miR475a-3p, ptc-miR475b-3p, ptc-miR475c, ptc-miR475d-3p, ptc-miR476a, ptc-miR476b, ath-miR849, ppt-miR1048-3p, ddi-miR-1176, gma-miR1510a-3p, gma-miR1513a-3p, sly-miR1918, osa-miR2106, gma-miR1510b-3p, zma-miR2275a-5p, zma-miR2275d-5p, mtr-miR2591, mtr-miR2597, mtr-miR2645, osa-miR2878-3p, aly-miR856-3p, aly-miR86…
SDH5 Os04g0418000 LOC_Os04g34100 OsJ_14772 OSJNBa0033G16.15 OSJNBb0108J11.2	77	ath-miR399b, ath-miR399c-3p, osa-miR399a, osa-miR399b, osa-miR399c, osa-miR399d, osa-miR399j, osa-miR399k, sbi-miR399a, sbi-miR399c, sbi-miR399d, sbi-miR399g, zma-miR399a-3p, zma-miR399c-3p, zma-miR399e-3p, zma-miR399f-3p, sbi-miR399h, sbi-miR399i, ptc-miR399d, ptc-miR399f, ptc-miR399g, ptc-miR399i, mtr-miR399l, mtr-miR399p, tae-miR399, vvi-miR399a, vvi-miR399b, vvi-miR399h, vvi-miR399c, sly-miR3…
At4g30220 F9N11.70	75	ath-miR159a, ath-miR159b-3p, ath-miR159c, osa-miR159a.1, osa-miR159b, osa-miR159d, sbi-miR159a, sof-miR159a, sof-miR159b, sof-miR159d, sof-miR159c, gma-miR159a-3p, zma-miR159a-3p, zma-miR159b-3p, zma-miR159c-3p, zma-miR159d-3p, sbi-miR159b, ptc-miR159a, ptc-miR159b, ptc-miR159d, ath-miR850, pta-miR159a, pta-miR159b, pta-miR159c, smo-miR159, smo-miR1115-3p, tae-miR159a, tae-miR159b, bna-miR159, vv…
At4g30220 F9N11.70	74	ath-miR164a, ath-miR164b-5p, osa-miR164a, osa-miR164b, osa-miR164f, zma-miR164a-5p, zma-miR164d-5p, zma-miR164b-5p, zma-miR164c-5p, sbi-miR164a, ptc-miR164a, ptc-miR164b, ptc-miR164c, ptc-miR164d, ptc-miR164e, mtr-miR164a, mtr-miR164b, mtr-miR164c, tae-miR164, bna-miR164a, vvi-miR164a, vvi-miR164c, vvi-miR164d, gma-miR164a, bra-miR164a, sbi-miR164d, sbi-miR164e, zma-miR164g-5p, csi-miR164, ctr-mi…
RLK7 At1g09970 F21M12.36	74	ath-miR164a, ath-miR164b-5p, osa-miR164a, osa-miR164b, osa-miR164f, zma-miR164a-5p, zma-miR164d-5p, zma-miR164b-5p, zma-miR164c-5p, sbi-miR164a, ptc-miR164a, ptc-miR164b, ptc-miR164c, ptc-miR164d, ptc-miR164e, mtr-miR164a, mtr-miR164b, mtr-miR164c, tae-miR164, bna-miR164a, vvi-miR164a, vvi-miR164c, vvi-miR164d, gma-miR164a, bra-miR164a, sbi-miR164d, sbi-miR164e, zma-miR164g-5p, csi-miR164, ctr-mi…
Os09g0505700 LOC_Os09g32810	74	ath-miR319a, ath-miR319b, ath-miR319c, mtr-miR319a-3p, gma-miR319a, gma-miR319b, gma-miR319c, ptc-miR319a, ptc-miR319b, ptc-miR319c, ptc-miR319d, ptc-miR319e, ptc-miR319f, ptc-miR319g, ptc-miR319h, ppt-miR319a, ppt-miR319b, mtr-miR319b-3p, pta-miR319, vvi-miR319b, vvi-miR319c, vvi-miR319f, sly-miR319a, pvu-miR319c, aqc-miR319, ctr-miR319, rco-miR319a, rco-miR319b, rco-miR319c, rco-miR319d, aly-mi…
GRV2 GFS2 KAM2 At2g26890 F12C20.7	72	ath-miR169b-5p, ath-miR169c, osa-miR169b, osa-miR169c, sbi-miR169b, gma-miR169a, zma-miR169c-5p, ptc-miR169d, ptc-miR169e, ptc-miR169f, ptc-miR169g, ptc-miR169h, ptc-miR169p, ptc-miR169z, mtr-miR169g, mtr-miR169b, ppt-miR894, vvi-miR169a, vvi-miR169c, vvi-miR169d, vvi-miR169j, vvi-miR169k, vvi-miR169s, vvi-miR169w, sly-miR169a, pta-miR1311, sbi-miR169k, mtr-miR2675, aqc-miR169c, zma-miR169r-5p, r…
CPP1 CDF1 At5g23040 MYJ24.3	71	ath-miR399a, ath-miR399d, ath-miR399e, ath-miR399f, osa-miR399e, osa-miR399f, osa-miR399g, osa-miR399k, sbi-miR399e, sbi-miR399f, sbi-miR399g, mtr-miR399c, mtr-miR399a, mtr-miR399e, zma-miR399f-3p, ptc-miR399a, ptc-miR399b, ptc-miR399c, mtr-miR399f, mtr-miR399g, mtr-miR399h, mtr-miR399i, bna-miR399a, vvi-miR399e, vvi-miR399g, vvi-miR399d, osa-miR1875, zma-miR399g-3p, sbi-miR399k, rco-miR399b, rco…
TIF3H1 At1g10840 T16B5.2	71	ath-miR408-3p, osa-miR408-3p, osa-miR437, sof-miR408a, sof-miR408b, sof-miR408c, sof-miR408d, zma-miR408a, ptc-miR408-3p, ppt-miR408a, pta-miR408, ppt-miR408b, smo-miR408, tae-miR408, vvi-miR408, sbi-miR408, sbi-miR437a, sbi-miR437b, sbi-miR437c, sbi-miR437d, sbi-miR437e, sbi-miR437f, sbi-miR437g, sbi-miR437i, sbi-miR437j, sbi-miR437k, sbi-miR437l, sbi-miR437m, sbi-miR437n, sbi-miR437o, sbi-miR43…
MBD4 At3g63030 T20O10.130	71	ath-miR399b, ath-miR399c-3p, osa-miR399d, osa-miR399i, osa-miR399j, sbi-miR399d, sbi-miR399b, mtr-miR399b, mtr-miR399d, zma-miR399b-3p, zma-miR399d-3p, zma-miR399e-3p, sbi-miR399i, ptc-miR399i, mtr-miR399l, mtr-miR399m, mtr-miR399n, mtr-miR399o, mtr-miR399p, ppt-miR1061-5p, vvi-miR399b, gma-miR1516a-3p, vvi-miR399c, sly-miR399, pvu-miR399a, mtr-miR399q, aqc-miR399, zma-miR399i-3p, zma-miR399j-3p,…
OHP1 HLIP OHP PDE335 At5g02120 T7H20.170	71	ath-miR159a, ath-miR159b-3p, ath-miR159c, osa-miR159a.1, osa-miR159b, sbi-miR159a, sof-miR159a, sof-miR159b, sof-miR159d, gma-miR159a-3p, zma-miR159a-3p, zma-miR159b-3p, ptc-miR159a, ptc-miR159b, ath-miR850, pta-miR159a, pta-miR159b, pta-miR159c, smo-miR159, smo-miR1115-3p, tae-miR159a, tae-miR159b, bna-miR159, vvi-miR159c, sly-miR159, bra-miR159a, mtr-miR159a, pvu-miR159a.1, mtr-miR2594, zma-miR…
ZIP7 ZIP3 ZIP7a Os05g0198400 LOC_Os05g10940 OsJ_17459 OSJNBa0007C23.6	69	ath-miR390a-5p, ath-miR390b-5p, osa-miR390-5p, ptc-miR390a, ptc-miR390b, ptc-miR390c, ptc-miR390d-5p, ppt-miR390a, ppt-miR390b, ppt-miR390c-5p, mtr-miR390, ghr-miR390a, ghr-miR390b, ghr-miR390c, bna-miR390a, bna-miR390b, bna-miR390c, vvi-miR390, gma-miR390a-5p, gma-miR1522, sbi-miR390, zma-miR390a-5p, zma-miR390b-5p, csi-miR390, rco-miR390a, rco-miR390b, aly-miR390a-5p, aly-miR390b-5p, aly-miR423…
SD18 ARK3 At4g21380 T6K22.110	69	ath-miR390a-5p, ath-miR390b-5p, osa-miR390-5p, ptc-miR390a, ptc-miR390b, ptc-miR390c, ptc-miR390d-5p, ppt-miR390a, ppt-miR390b, ppt-miR390c-5p, mtr-miR390, ghr-miR390a, ghr-miR390b, ghr-miR390c, bna-miR390a, bna-miR390b, bna-miR390c, vvi-miR390, gma-miR390a-5p, gma-miR1522, sbi-miR390, zma-miR390a-5p, zma-miR390b-5p, csi-miR390, rco-miR390a, rco-miR390b, aly-miR390a-5p, aly-miR390b-5p, aly-miR423…
BIP5	69	ath-miR391-5p, ath-miR396a-5p, osa-miR396a-5p, osa-miR396b-5p, sbi-miR396b, sbi-miR396a, sof-miR396, gma-miR396a-5p, zma-miR396b-5p, zma-miR396a-5p, ptc-miR396a, ptc-miR396b, ath-miR844-3p, ath-miR869.2, mtr-miR396b-5p, ghr-miR396a, ghr-miR396b, ppt-miR1055, vvi-miR396a, vvi-miR396b, vvi-miR396d, vvi-miR396c, lja-miR396, aqc-miR396a, gra-miR482, aly-miR319b-5p, aly-miR391-5p, aly-miR396a-5p, aly-…
BIP5	68	ath-miR390a-5p, ath-miR390b-5p, osa-miR390-5p, ptc-miR390a, ptc-miR390b, ptc-miR390c, ptc-miR390d-5p, ppt-miR390a, ppt-miR390b, ppt-miR390c-5p, mtr-miR390, ghr-miR390a, ghr-miR390b, ghr-miR390c, bna-miR390a, bna-miR390b, bna-miR390c, vvi-miR390, gma-miR390a-5p, gma-miR390b-5p, sbi-miR390, mtr-miR2111d-3p, zma-miR390a-5p, zma-miR390b-5p, csi-miR390, rco-miR390a, rco-miR390b, aly-miR390a-5p, aly-mi…
CSN1 COP11 FUS6 At3g61140 T20K12.40	68	ath-miR390a-5p, ath-miR390b-5p, osa-miR390-5p, ptc-miR390a, ptc-miR390b, ptc-miR390c, ptc-miR390d-5p, ppt-miR390a, ppt-miR390b, ppt-miR390c-5p, mtr-miR390, ghr-miR390a, ghr-miR390b, ghr-miR390c, bna-miR390a, bna-miR390b, bna-miR390c, vvi-miR390, gma-miR390a-5p, gma-miR390b-5p, sbi-miR390, osa-miR2873a, zma-miR390a-5p, zma-miR390b-5p, csi-miR390, rco-miR390a, rco-miR390b, aly-miR390a-5p, aly-miR39…
PVA21 At5g47180 MQL5.3	66	osa-miR166j-5p, pta-miR482a, pta-miR482b, cre-miR1155, pta-miR482c, gma-miR1507a, vvi-miR482, osa-miR1847.1, mtr-miR1507-3p, mtr-miR1510a-5p, gma-miR1507b, vun-miR1507a, mdm-miR482a-3p, vun-miR1507b, osa-miR2118a, osa-miR2118b, osa-miR2118c, osa-miR2118f, osa-miR2118g, osa-miR2118i, osa-miR2118j, osa-miR2118m, osa-miR2118n, osa-miR2118q, zma-miR2118b, zma-miR2118c, ghr-miR482a, ath-miR774b-3p, gs…
DREB2A ERF40 OsI_000512	66	ptc-miR477a-5p, ptc-miR477b, ppt-miR477c, ppt-miR477a-5p, ppt-miR477f, ppt-miR477g-5p, ppt-miR477d, ppt-miR477e, ppt-miR477h, ppt-miR477b, cre-miR1150.3, cre-miR1170.2, vvi-miR169r, vvi-miR169u, vvi-miR477a, ath-miR2111a-5p, ath-miR2111b-5p, bna-miR2111b-5p, bna-miR2111a-5p, mtr-miR2111c, mtr-miR2111d-5p, mtr-miR2111e-5p, mtr-miR2111g-5p, mtr-miR2111h, mtr-miR2111i, mtr-miR2111m-5p, mtr-miR2111n,…
FBL15 At4g33210 F4I10.140	65	ath-miR166e-5p, ath-miR319a, ath-miR319b, osa-miR166c-5p, osa-miR166d-5p, zma-miR166i-5p, zma-miR166c-5p, mtr-miR319a-3p, gma-miR166a-5p, gma-miR319a, gma-miR319b, ptc-miR319a, ptc-miR319b, ptc-miR319c, ptc-miR319d, mtr-miR319b-3p, mtr-miR166g-5p, vvi-miR319b, vvi-miR319c, vvi-miR319f, aqc-miR319, csi-miR166e-5p, ctr-miR319, rco-miR319a, rco-miR319b, rco-miR319c, aly-miR319a-3p, aly-miR319b-3p, a…
GSVIVT00026920001 LOC100243180	65	ath-miR169h, ath-miR169i, ath-miR169j, ath-miR169k, ath-miR169l, ath-miR169m, ath-miR169n, osa-miR169h, osa-miR169i-5p.1, osa-miR169j, osa-miR169k, osa-miR169l, osa-miR169m, sbi-miR169f, sbi-miR169g, zma-miR169i-5p, zma-miR169k-5p, zma-miR169j-5p, ptc-miR169i, ptc-miR169j, ptc-miR169k, ptc-miR169l, ptc-miR169m, ghb-miR169a, bna-miR169g, bna-miR169h, bna-miR169i, bna-miR169j, bna-miR169k, bna-miR1…
NRPD1 NRPD1a RMD3 RPD1 SDE4 SMD2 At1g63020 F16M19.19 F16P17.19	65	ath-miR390a-5p, ath-miR390b-5p, osa-miR390-5p, gma-miR172b-5p, ptc-miR390a, ptc-miR390b, ptc-miR390c, ptc-miR390d-5p, ppt-miR390a, ppt-miR390b, ppt-miR390c-5p, mtr-miR390, ghr-miR390a, ghr-miR390b, ghr-miR390c, bna-miR390a, bna-miR390b, bna-miR390c, vvi-miR390, gma-miR390a-5p, gma-miR390b-5p, sbi-miR390, zma-miR390a-5p, zma-miR390b-5p, csi-miR390, rco-miR390a, rco-miR390b, aly-miR390a-5p, aly-miR…
OCP3 At5g11270 F2I11.160	65	ath-miR390a-5p, ath-miR390b-5p, osa-miR390-5p, ptc-miR390a, ptc-miR390b, ptc-miR390c, ptc-miR390d-5p, ppt-miR390a, ppt-miR390b, mtr-miR390, ghr-miR390a, ghr-miR390b, ghr-miR390c, bna-miR390a, bna-miR390b, bna-miR390c, vvi-miR390, gma-miR390a-5p, gma-miR390b-5p, gma-miR1510a-3p, sbi-miR390, mtr-miR2592a-5p, zma-miR390a-5p, zma-miR390b-5p, csi-miR390, rco-miR390a, rco-miR390b, aly-miR390a-5p, aly-m…
At1g31730 F27M3.7	64	ath-miR390a-5p, ath-miR390b-5p, osa-miR390-5p, ptc-miR390a, ptc-miR390b, ptc-miR390c, ptc-miR390d-5p, ppt-miR390a, ppt-miR390b, ppt-miR390c-5p, mtr-miR390, ghr-miR390a, ghr-miR390b, ghr-miR390c, bna-miR390a, bna-miR390b, bna-miR390c, vvi-miR390, gma-miR390a-5p, osa-miR1847.1, sbi-miR390, zma-miR390a-5p, zma-miR390b-5p, osa-miR2932, csi-miR390, rco-miR390a, rco-miR390b, aly-miR390a-5p, aly-miR390b…
JAL19 At1g73040 F3N23.24	64	ath-miR159a, ath-miR159b-3p, ath-miR159c, osa-miR159a.1, osa-miR159b, osa-miR159c, osa-miR159d, osa-miR159e, osa-miR159f, sbi-miR159a, sof-miR159a, sof-miR159b, sof-miR159d, sof-miR159c, gma-miR159a-3p, zma-miR159a-3p, zma-miR159b-3p, zma-miR159c-3p, zma-miR159d-3p, sbi-miR159b, ptc-miR159a, ptc-miR159b, ptc-miR159d, pta-miR159a, pta-miR159c, smo-miR159, tae-miR159a, tae-miR159b, bna-miR159, vvi-…
UPL1 At1g55860 F14J16.14 F14J16.37	64	ath-miR398a-3p, ath-miR398b-3p, ath-miR398c-3p, osa-miR398a, osa-miR398b, gma-miR398a, gma-miR398b, ptc-miR398a, ptc-miR398b, ptc-miR398c-3p, mtr-miR398a-3p, mtr-miR398b, mtr-miR398c, vvi-miR398a, vvi-miR398b, vvi-miR398c, bol-miR398a-3p, aqc-miR398a, aqc-miR398b, zma-miR398a-3p, zma-miR398b-3p, sbi-miR398, csi-miR398, rco-miR398a, rco-miR398b, gra-miR398, ghr-miR398, aly-miR398a-3p, aly-miR398b-…
UPL2 At1g70320 F17O7.14/F17O7.15	62	osa-miR169d, osa-miR169f.1, osa-miR169g, osa-miR169n, osa-miR169o, sbi-miR169c, sbi-miR169i, zma-miR169f-5p, zma-miR169g, zma-miR169h, ptc-miR169o, ptc-miR169r, ptc-miR169v, ptc-miR169w, ath-miR851-5p, mtr-miR169f, ppt-miR1058, bna-miR169c, bna-miR169d, bna-miR169e, bna-miR169f, vvi-miR169v, vvi-miR169x, sly-miR169d, sbi-miR169h, sbi-miR169m, sbi-miR169n, aqc-miR169a, zma-miR169m-5p, zma-miR169n-…
UPL1 At1g55860 F14J16.14 F14J16.37	61	ath-miR390a-5p, ath-miR390b-5p, osa-miR390-5p, ptc-miR390a, ptc-miR390b, ptc-miR390c, ptc-miR390d-5p, ppt-miR390a, ppt-miR390b, ppt-miR390c-5p, mtr-miR390, ghr-miR390a, ghr-miR390b, ghr-miR390c, bna-miR390a, bna-miR390b, bna-miR390c, vvi-miR390, gma-miR390a-5p, sbi-miR390, zma-miR390a-5p, zma-miR390b-5p, csi-miR390, rco-miR390a, rco-miR390b, aly-miR161-3p.2, aly-miR390a-5p, aly-miR390b-5p, aly-mi…
UPL1 At1g55860 F14J16.14 F14J16.37	61	ath-miR390a-5p, ath-miR390b-5p, osa-miR390-5p, ptc-miR390a, ptc-miR390b, ptc-miR390c, ptc-miR390d-5p, ppt-miR390a, ppt-miR390b, ppt-miR390c-5p, mtr-miR390, ghr-miR390a, ghr-miR390b, ghr-miR390c, bna-miR390a, bna-miR390b, bna-miR390c, vvi-miR390, gma-miR390a-5p, gma-miR390b-5p, sbi-miR390, zma-miR390a-5p, zma-miR390b-5p, csi-miR390, rco-miR390a, rco-miR390b, aly-miR390a-5p, aly-miR390b-5p, tcc-miR…
At3g50280 F11C1.120	61	ath-miR159a, zma-miR160c-3p, gma-miR159a-3p, ptc-miR159a, ptc-miR159b, ppt-miR902a-3p, ppt-miR902b-3p, cre-miR908.1, pta-miR952a, ppt-miR902c-3p, ppt-miR902e-3p, ppt-miR902g-3p, ppt-miR1223e, ppt-miR1223f, ppt-miR1223g, ppt-miR1223j, bna-miR159, vvi-miR159c, osa-miR1424, vvi-miR171g, sly-miR159, bra-miR159a, mtr-miR159a, pvu-miR159a.1, zma-miR159g-5p, zma-miR159h-5p, zma-miR159i-5p, zma-miR169p-3…
PRAF1 PRAF4 At1g76950 F22K20.5	61	ath-miR171b-5p, ath-miR840-3p, cre-miR908.3, pta-miR946a-5p, ppt-miR1046-3p, ath-miR2111b-3p, mdm-miR482a-5p, bna-miR2111b-3p, bdi-miR171c-5p, mtr-miR2597, mtr-miR2610a, mtr-miR2610b, osa-miR2922, aly-miR170-3p, aly-miR171b-5p, aly-miR400-3p, aly-miR825-3p, aly-miR840-3p, aly-miR2111b-3p, aly-miR851-3p, csi-miR3951, gma-miR4998, osa-miR5161, bdi-miR5171a, mtr-miR5251, mtr-miR5262, mtr-miR5285a, m…
FIGL1 At3g27120 MOJ10.20	60	ath-miR319a, ath-miR319b, mtr-miR319a-3p, gma-miR319a, gma-miR319b, ptc-miR319a, ptc-miR319b, ptc-miR319c, ptc-miR319d, ppt-miR319a, ppt-miR319b, ppt-miR319c, ppt-miR319d-3p, mtr-miR319b-3p, ppt-miR319e, pta-miR159b, pta-miR159c, smo-miR159, vvi-miR319b, vvi-miR319c, vvi-miR319f, vvi-miR319g, sly-miR319a, aqc-miR319, ctr-miR319, rco-miR319a, rco-miR319b, rco-miR319c, aly-miR319a-3p, aly-miR319b-3…
At4g26220 T25K17.30	59	ath-miR393a-5p, ath-miR393b-5p, osa-miR393a, osa-miR393b-5p, sbi-miR393a, mtr-miR393a, zma-miR393a-5p, ptc-miR393a-5p, ptc-miR393b-5p, ptc-miR393c, osa-miR812a, osa-miR812b, osa-miR812c, osa-miR812d, osa-miR812e, mtr-miR393b-5p, bna-miR393, smo-miR1101-5p, vvi-miR393b, gma-miR393a, vvi-miR393a, sbi-miR393b, zma-miR393b-5p, zma-miR393c-5p, rco-miR393, ghr-miR393, aly-miR393a-5p, aly-miR393b-5p, al…
TRM112B SMO2L At1g78190 T11I11.13	59	ath-miR394a, ath-miR394b-5p, osa-miR394, sbi-miR394a, zma-miR394a-5p, zma-miR394b-5p, zma-miR399c-5p, ptc-miR394a-5p, ptc-miR394b-5p, ptc-miR478a, ptc-miR478b, ptc-miR478c, ptc-miR478d, ptc-miR478f, ptc-miR478p, cre-miR1160.1, vvi-miR394a, vvi-miR394b, vvi-miR394c, mtr-miR1510a-5p, sbi-miR394b, ghr-miR394b, ghr-miR394a, aly-miR394a-5p, aly-miR394b-5p, ahy-miR394, gma-miR4372a, gma-miR394b-5p, gma…
CBP20 Os02g0612300 LOC_Os02g39890 OJ1004_A05.24	59	ptc-miR167f-3p, ptc-miR167g-3p, ptc-miR167h-3p, ath-miR2111a-5p, ath-miR2111b-5p, bna-miR2111b-5p, bna-miR2111a-5p, mtr-miR2111c, mtr-miR2111d-5p, mtr-miR2111e-5p, mtr-miR2111g-5p, mtr-miR2111h, mtr-miR2111i, mtr-miR2111m-5p, mtr-miR2111n, mtr-miR2111o, mtr-miR2111b, mtr-miR2111j, mtr-miR2111k, zma-miR167j-3p, aly-miR2111a-5p, aly-miR2111b-5p, ahy-miR167-3p, vvi-miR2111-5p, lja-miR2111-5p, bra-mi…
CBP20 At5g44200 MLN1.12	58	ath-miR390a-5p, ath-miR390b-5p, osa-miR390-5p, ptc-miR390a, ptc-miR390b, ptc-miR390c, ptc-miR390d-5p, ppt-miR390a, ppt-miR390b, ppt-miR390c-5p, mtr-miR390, ghr-miR390a, ghr-miR390b, ghr-miR390c, bna-miR390a, bna-miR390b, bna-miR390c, vvi-miR390, gma-miR390a-5p, sbi-miR390, bdi-miR166a-5p, zma-miR390a-5p, zma-miR390b-5p, csi-miR390, rco-miR390a, rco-miR390b, aly-miR390a-5p, aly-miR390b-5p, gma-miR…
PCMP-E83 At3g05340 T12H1.31	58	ath-miR156a-3p, ath-miR399b, ath-miR399c-3p, osa-miR399d, ath-miR164c-5p, osa-miR164d, zma-miR156h-3p, sbi-miR399d, sbi-miR164b, zma-miR399e-3p, sbi-miR399i, mtr-miR399l, mtr-miR399p, cre-miR1154-3p, vvi-miR399b, vvi-miR399c, vvi-miR399i, osa-miR1846a-3p, osa-miR1846b-3p, pvu-miR399a, zma-miR164f-5p, zma-miR164h-5p, zma-miR399i-3p, zma-miR399j-3p, rco-miR399a, aly-miR156a-3p, aly-miR164c-5p, aly-…
HVA22A At1g74520 F1M20.20	58	ath-miR156a-3p, ath-miR399b, ath-miR399c-3p, osa-miR399d, ath-miR164c-5p, osa-miR164d, zma-miR156h-3p, sbi-miR399d, sbi-miR164b, zma-miR399e-3p, sbi-miR399i, mtr-miR399l, mtr-miR399p, cre-miR1154-3p, vvi-miR399b, vvi-miR399c, vvi-miR399i, osa-miR1846a-3p, osa-miR1846b-3p, pvu-miR399a, zma-miR164f-5p, zma-miR164h-5p, zma-miR399i-3p, zma-miR399j-3p, rco-miR399a, aly-miR156a-3p, aly-miR164c-5p, aly-…
At5g64030 MBM17.13	58	ath-miR165a-3p, ath-miR165b, ath-miR166f, osa-miR166e-3p, osa-miR166m, zma-miR166h-3p, zma-miR166e, zma-miR166i-3p, zma-miR166f, zma-miR166g-3p, zma-miR166b-3p, zma-miR166c-3p, zma-miR166d-3p, sbi-miR166d, sbi-miR166c, sbi-miR166b, sbi-miR166a, pta-miR166b, pta-miR166c, smo-miR1096, sly-miR166b, sbi-miR166h, sbi-miR166i, sbi-miR166j, zma-miR2275a-3p, crt-miR166a, csi-miR166b, aly-miR165a-3p, aly-…
MTP7 Os01g0130000 LOC_Os01g03914 OsJ_00239 P0408F06.28 P0504H10.3	57	ath-miR165a-3p, ath-miR165b, ath-miR166f, osa-miR166e-3p, zma-miR166h-3p, zma-miR166e, zma-miR166i-3p, zma-miR166f, zma-miR166g-3p, zma-miR166b-3p, zma-miR166c-3p, zma-miR166d-3p, sbi-miR166d, sbi-miR166c, sbi-miR166b, sbi-miR166a, pta-miR166b, pta-miR166c, smo-miR1096, osa-miR1851, sly-miR166b, sbi-miR166h, sbi-miR166i, sbi-miR166j, zma-miR2275a-3p, crt-miR166a, csi-miR166b, aly-miR165a-3p, aly-…
MADS22 RMD1 Os02g0761000 LOC_Os02g52340 OJ1175_B01.24 OsJ_08471	56	ath-miR169b-5p, ath-miR169c, osa-miR169b, osa-miR169c, sbi-miR169b, gma-miR169a, zma-miR169c-5p, ptc-miR169d, ptc-miR169e, ptc-miR169f, ptc-miR169g, ptc-miR169h, ptc-miR169p, ptc-miR169s, mtr-miR169g, mtr-miR169b, ppt-miR898b, ppt-miR898a-5p, vvi-miR169a, vvi-miR169c, vvi-miR169j, vvi-miR169k, vvi-miR169s, vvi-miR169i, vvi-miR169w, sly-miR169a, sbi-miR169k, aqc-miR169c, zma-miR169r-5p, rco-miR169…
NBP35 At5g50960 K3K7.12	55	ath-miR399a, ath-miR399d, ath-miR399e, ath-miR399f, osa-miR399e, osa-miR399f, osa-miR399g, sbi-miR399e, sbi-miR399f, mtr-miR399c, mtr-miR399a, mtr-miR399e, ptc-miR399a, ptc-miR399b, ptc-miR399j, mtr-miR399f, mtr-miR399g, mtr-miR399h, mtr-miR399i, bna-miR399a, vvi-miR399e, vvi-miR399g, rco-miR399b, rco-miR399c, rco-miR399e, ghr-miR399d, aly-miR399a-3p, aly-miR399d-3p, aly-miR399e-3p, aly-miR399f-3…
PCMP-E56 At1g32415 F5D14.18	55	ath-miR159b-5p, ath-miR396a-5p, osa-miR396a-5p, osa-miR396b-5p, sbi-miR396b, sbi-miR396a, sof-miR396, gma-miR159a-5p, gma-miR396a-5p, zma-miR396b-5p, zma-miR396a-5p, ptc-miR396a, ptc-miR396b, ptc-miR396f, mtr-miR396b-5p, ghr-miR396a, ghr-miR396b, smo-miR396, vvi-miR396d, vvi-miR396c, lja-miR396, aqc-miR396a, aly-miR159a-5p, aly-miR159b-5p, aly-miR396a-5p, gma-miR396e, csi-miR396a, csi-miR396b, bg…
Os12g0104800 LOC_Os12g01390	54	ath-miR390a-5p, ath-miR390b-5p, osa-miR390-5p, ptc-miR390a, ptc-miR390b, ptc-miR390c, ptc-miR390d-5p, ppt-miR390a, ppt-miR390b, mtr-miR390, ghr-miR390a, ghr-miR390b, ghr-miR390c, bna-miR390a, bna-miR390b, bna-miR390c, vvi-miR390, gma-miR390a-5p, sbi-miR390, zma-miR390a-5p, zma-miR390b-5p, csi-miR390, rco-miR390a, rco-miR390b, aly-miR390a-5p, aly-miR390b-5p, esi-miR3463-5p, tcc-miR390a, tcc-miR390…
CURT1B PSAP PSI-P TMP14 At2g46820 F19D11.10	54	ath-miR408-3p, osa-miR408-3p, sof-miR408a, sof-miR408b, sof-miR408c, sof-miR408d, sof-miR408e, zma-miR408a, ptc-miR408-3p, ppt-miR408a, pta-miR408, ppt-miR408b, smo-miR408, tae-miR408, vvi-miR408, sbi-miR408, zma-miR408b-3p, rco-miR408, aly-miR160b-3p, aly-miR408-3p, esi-miR3454c-3p, esi-miR3454f-3p, esi-miR3454b-3p, ahy-miR408-3p, pab-miR3694, csi-miR408, gma-miR408d, bdi-miR408-3p, ssp-miR408d,…
CURT1B PSAP PSI-P TMP14 At2g46820 F19D11.10	54	osa-miR166k-3p, osa-miR166l-3p, osa-miR169f.2, sbi-miR166e, zma-miR166k-3p, zma-miR166j-3p, sbi-miR166g, ppt-miR166j, ppt-miR166k, ppt-miR166l, smo-miR156b, cre-miR1165-5p, osa-miR1320-5p, osa-miR2093-5p, mtr-miR2630a, mtr-miR2630b, mtr-miR2630c, mtr-miR2630w, mtr-miR2630x, mtr-miR2630y, mtr-miR2630d, mtr-miR2630e, mtr-miR2630f, mtr-miR2630g, mtr-miR2630h, mtr-miR2630i, mtr-miR2630j, mtr-miR2630k…
CURT1B PSAP PSI-P TMP14 At2g46820 F19D11.10	54	osa-miR166k-3p, osa-miR166l-3p, osa-miR169f.2, sbi-miR166e, zma-miR166k-3p, zma-miR166j-3p, sbi-miR166g, ppt-miR166j, ppt-miR166k, ppt-miR166l, smo-miR156b, cre-miR1165-5p, osa-miR1320-5p, osa-miR2093-5p, mtr-miR2630a, mtr-miR2630b, mtr-miR2630c, mtr-miR2630w, mtr-miR2630x, mtr-miR2630y, mtr-miR2630d, mtr-miR2630e, mtr-miR2630f, mtr-miR2630g, mtr-miR2630h, mtr-miR2630i, mtr-miR2630j, mtr-miR2630k…
PHL8 At1g69580 F24J1.30	53	ath-miR391-3p, ath-miR394a, ath-miR394b-5p, osa-miR394, sbi-miR394a, zma-miR394a-5p, zma-miR394b-5p, ptc-miR394a-5p, ptc-miR394b-5p, ppt-miR1218, vvi-miR394b, sbi-miR394b, ghr-miR394b, ghr-miR394a, aly-miR391-3p, aly-miR394a-5p, aly-miR394b-5p, esi-miR3456-5p, ahy-miR394, gma-miR394b-5p, gma-miR394a-5p, csi-miR394, tcc-miR394a, tcc-miR394b, gma-miR394c-5p, bdi-miR394, ssl-miR394, gma-miR394d, gma…
Os03g0711500 LOC_Os03g50350 OsJ_011823 OSJNBb0033N16.11	53	ath-miR403-3p, ptc-miR403a, ptc-miR403b, ptc-miR403c-3p, ppt-miR1046-3p, osa-miR1435, vvi-miR403a, vvi-miR403b, vvi-miR403c, vvi-miR403d, vvi-miR403e, vvi-miR403f, mtr-miR2594, osa-miR2922, rco-miR403a, rco-miR403b, aly-miR403a-3p, aly-miR827-5p, csi-miR403, tcc-miR403a, tcc-miR403b, gma-miR403a, gma-miR403b, sbi-miR5388, bna-miR403, hme-miR-33, htu-miR403a, htu-miR403b, htu-miR403c, htu-miR403d,…
NPF4.6 AIT1 NRT1.2 NTL1 NTR1:2 At1g69850 T17F3.12	53	ath-miR403-3p, ptc-miR403a, ptc-miR403b, ptc-miR403c-3p, ppt-miR1046-3p, osa-miR1435, vvi-miR403a, vvi-miR403b, vvi-miR403c, vvi-miR403d, vvi-miR403e, vvi-miR403f, mtr-miR2594, osa-miR2922, rco-miR403a, rco-miR403b, aly-miR403a-3p, aly-miR827-5p, csi-miR403, tcc-miR403a, tcc-miR403b, gma-miR403a, gma-miR403b, sbi-miR5388, bna-miR403, hme-miR-33, htu-miR403a, htu-miR403b, htu-miR403c, htu-miR403d,…
REM1.4 At5g23750 MRO11.21	53	ath-miR396b-5p, osa-miR396c-5p, sbi-miR396c, gma-miR396b-5p, zma-miR171k-5p, zma-miR171h-5p, ptc-miR396c, ptc-miR396d, ptc-miR396e-5p, ath-miR867, ath-miR869.1, mtr-miR396a-5p, bna-miR396a, pta-miR396, ppt-miR1071-5p, vvi-miR396b, gma-miR396c, aqc-miR396b, zma-miR396e-5p, zma-miR396f-5p, ccl-miR396, rco-miR396, aly-miR396b-5p, aly-miR823-5p, bgy-miR396b, bcy-miR396b, tcc-miR396c, tcc-miR396e, gma…
ATG12 APG12	51	ath-miR168a-5p, ath-miR168b-5p, osa-miR168a-5p, osa-miR168b, sbi-miR168, sof-miR168a, gma-miR168a, zma-miR168a-5p, zma-miR168b-5p, ptc-miR168a-5p, ptc-miR168b-5p, mtr-miR168a, bna-miR168a, vvi-miR168, aqc-miR168, ccl-miR168, crt-miR168, rco-miR168, aly-miR168a-5p, aly-miR168b-5p, hvu-miR168-5p, tcc-miR168, gma-miR168b, gma-miR4995, bdi-miR168-5p, cme-miR168, ssp-miR168a, mtr-miR168b, mtr-miR168c-…
At3g01520 F4P13.7	50	tae-miR1122a, osa-miR2055, mtr-miR1507-3p, ath-miR2111a-5p, ath-miR2111b-5p, bna-miR2111b-5p, bna-miR2111a-5p, bdi-miR1122, mtr-miR2111c, mtr-miR2111d-5p, mtr-miR2111e-5p, mtr-miR2111g-5p, mtr-miR2111h, mtr-miR2111i, mtr-miR2111m-5p, mtr-miR2111n, mtr-miR2111o, mtr-miR2111b, mtr-miR2111j, mtr-miR2111k, aly-miR2111a-5p, aly-miR2111b-5p, lja-miR2111-5p, bra-miR2111a-5p, bra-miR2111b-5p, gma-miR4414…
CHC1 At3g11130 F11B9.30 F9F8.6	50	ath-miR399b, ath-miR399c-3p, osa-miR399d, osa-miR399j, sbi-miR399d, zma-miR399e-3p, sbi-miR399i, ptc-miR399i, ptc-miR399e, mtr-miR399l, mtr-miR399p, vvi-miR399b, vvi-miR399c, vvi-miR399i, sly-miR399, pvu-miR399a, aqc-miR399, zma-miR399i-3p, zma-miR399j-3p, rco-miR399a, ghr-miR399c, aly-miR395e-5p, aly-miR399b-3p, aly-miR399c-3p, aly-miR395g-5p, csi-miR399d, csi-miR399b, tcc-miR399a, tcc-miR399i, …
Os01g0832000 LOC_Os01g61560 P0446G04.41	49	ath-miR396a-5p, osa-miR396a-5p, osa-miR396b-5p, sbi-miR396b, sbi-miR396a, sof-miR396, gma-miR396a-5p, zma-miR396b-5p, zma-miR396a-5p, ptc-miR396a, ptc-miR396b, mtr-miR396b-5p, ghr-miR396a, ghr-miR396b, vvi-miR396d, vvi-miR396c, lja-miR396, aqc-miR396a, aly-miR169m-3p, aly-miR396a-5p, gma-miR396e, csi-miR396a, csi-miR396b, bgy-miR396a, bcy-miR396a, tcc-miR396a, tcc-miR396b, bdi-miR396d-5p, bdi-miR…
SODCC.2 SOD2	49	ath-miR162a-3p, ath-miR162b-3p, osa-miR162a, osa-miR162b, zma-miR162-3p, mtr-miR162, ptc-miR162a, ptc-miR162b, ghr-miR162a, cpa-miR162a, vvi-miR162, gma-miR162a, sly-miR162, sbi-miR162, csi-miR162-3p, rco-miR162, aly-miR162a-3p, aly-miR162b-3p, aly-miR844-3p, aly-miR4235, pab-miR3704, tcc-miR162, gma-miR162b, bdi-miR5171a, bdi-miR162, gma-miR5373, gma-miR162c, aau-miR162, rgl-miR5577, rgl-miR5577…
SODCC.2 SOD2	49	ath-miR394a, ath-miR394b-5p, osa-miR394, sbi-miR394a, zma-miR394a-5p, zma-miR394b-5p, ptc-miR394a-5p, ptc-miR394b-5p, cre-miR917, ppt-miR1043-3p, vvi-miR394b, sbi-miR394b, ghr-miR394b, ghr-miR394a, aly-miR394a-5p, aly-miR394b-5p, aly-miR860-5p, ahy-miR394, gma-miR394b-5p, gma-miR394a-5p, csi-miR394, tcc-miR394a, tcc-miR394b, gma-miR394c-5p, bdi-miR394, ssl-miR394, gma-miR394d, gma-miR394e, gma-mi…
PYL10 PYL1 RCAR10 Os10g0573400 LOC_Os10g42280 OsJ_32555 OSJNBa0003O19.2	49	osa-miR399a, osa-miR399b, osa-miR399c, osa-miR399i, sbi-miR399a, sbi-miR399c, sbi-miR399b, mtr-miR399b, zma-miR399a-3p, zma-miR399c-3p, zma-miR399d-3p, sbi-miR399h, ptc-miR399f, ptc-miR399g, ptc-miR399h, mtr-miR399o, vvi-miR399a, vvi-miR399h, aqu-miR-2021-5p, sbi-miR399j, bdi-miR399a, mtr-miR399q, zma-miR399h-3p, rco-miR399d, csi-miR399e, csi-miR399c, tcc-miR399g, gma-miR4998, ath-miR5016, bdi-mi…
TIL At5g58070 K21L19.6	49	ath-miR168a-5p, ath-miR168b-5p, osa-miR168a-5p, osa-miR168b, sbi-miR168, sof-miR168a, gma-miR168a, zma-miR168a-5p, zma-miR168b-5p, ptc-miR168a-5p, ptc-miR168b-5p, mtr-miR168a, cre-miR1170.1, bna-miR168a, vvi-miR168, aqc-miR168, ccl-miR168, crt-miR168, rco-miR168, aly-miR168a-5p, aly-miR168b-5p, hvu-miR168-5p, tcc-miR168, gma-miR168b, bdi-miR168-5p, cme-miR168, ssp-miR168a, mtr-miR168b, mtr-miR168…
TIL At5g58070 K21L19.6	49	ath-miR399b, ath-miR399c-3p, osa-miR399d, osa-miR399i, ath-miR156g, sbi-miR399d, sbi-miR399b, mtr-miR399b, mtr-miR399d, zma-miR399b-3p, zma-miR399d-3p, zma-miR399e-3p, sbi-miR399i, mtr-miR399l, mtr-miR399m, mtr-miR399n, mtr-miR399o, mtr-miR399p, smo-miR156a, vvi-miR399b, vvi-miR399c, pvu-miR399a, sbi-miR821d, mtr-miR399q, zma-miR399i-3p, zma-miR399j-3p, rco-miR399a, rco-miR399d, aly-miR156g-5p, a…
FHA1	48	ath-miR408-3p, osa-miR408-3p, sof-miR408a, sof-miR408b, sof-miR408c, sof-miR408d, zma-miR408a, ptc-miR408-3p, ath-miR834, pta-miR408, ppt-miR408b, smo-miR408, tae-miR408, vvi-miR408, osa-miR1429-3p, gma-miR159b-5p, sbi-miR408, zma-miR408b-3p, ath-miR2938, rco-miR408, aly-miR408-3p, aly-miR834-3p, aly-miR3449-5p, ahy-miR408-3p, csi-miR408, gma-miR408d, bdi-miR408-3p, ssp-miR408d, ssp-miR408a, mtr-…
At3g61750 F15G16.140 F21F14.14	48	osa-miR395b, osa-miR395d, osa-miR395e, osa-miR395g, osa-miR395h, osa-miR395i, osa-miR395j, osa-miR395k, osa-miR395l, osa-miR395s, osa-miR395a, sbi-miR395b, sbi-miR395a, sbi-miR395d, sbi-miR395e, zma-miR395b-3p, zma-miR395a-3p, osa-miR395m, osa-miR395n, osa-miR395p, osa-miR395q, osa-miR395w, osa-miR395r, sbi-miR395c, sbi-miR395g, sbi-miR395h, sbi-miR395i, sbi-miR395j, sbi-miR395l, zma-miR395d-3p, …
impdh	48	ath-miR159a, osa-miR159a.1, osa-miR159b, sbi-miR159a, sof-miR159a, sof-miR159b, sof-miR159d, gma-miR159a-3p, zma-miR159a-3p, zma-miR159b-3p, ptc-miR159a, ptc-miR159b, tae-miR159a, tae-miR159b, bna-miR159, vvi-miR159c, sly-miR159, bra-miR159a, mtr-miR159a, pvu-miR159a.1, mtr-miR2625, zma-miR159f-3p, zma-miR159j-3p, zma-miR159k-3p, rco-miR159, aly-miR159a-3p, aly-miR3440-5p, ahy-miR159, hvu-miR159b…
WRKY53 At4g23810 F9D16.280	48	ath-miR394b-3p, zma-miR159b-5p, ptc-miR475a-3p, ptc-miR475b-3p, ptc-miR475c, ptc-miR478d, osa-miR1432-3p, gma-miR1508a, sbi-miR821b, mtr-miR2632a, mtr-miR2632b, aqc-miR167, zma-miR159j-5p, zma-miR159k-5p, zma-miR399g-3p, sbi-miR399k, aly-miR394a-3p, gso-miR1508a, gma-miR4354, gma-miR1508c, bdi-miR5177, mtr-miR5216a, mtr-miR5216b, gma-miR5372, osa-miR5523, rgl-miR164, nta-miR6025d, ptc-miR6468-5p,…
ATG101 At5g66930 MUD21.19	47	ath-miR319c, mtr-miR319a-3p, gma-miR319a, gma-miR319b, gma-miR319c, ptc-miR160e-3p, ptc-miR319a, ptc-miR319b, ptc-miR319c, ptc-miR319d, ptc-miR319e, ptc-miR319f, ptc-miR319g, ptc-miR319h, ppt-miR319a, ppt-miR319b, ath-miR864-3p, mtr-miR319b-3p, pta-miR319, ppt-miR1048-3p, sly-miR319a, gma-miR2109-3p, pvu-miR319c, ctr-miR319, rco-miR319d, aly-miR319c-3p, aly-miR319d-3p, ahy-miR160-3p, gma-miR319e,…
rsgA EMB1688 At1g67440 T1F15.10	47	ath-miR394b-3p, zma-miR159b-5p, ptc-miR475a-3p, ptc-miR475b-3p, ptc-miR475c, ptc-miR478d, osa-miR1432-3p, gma-miR1508a, sbi-miR821b, mtr-miR2632a, mtr-miR2632b, zma-miR159j-5p, zma-miR159k-5p, zma-miR399g-3p, sbi-miR399k, aly-miR394a-3p, gso-miR1508a, gma-miR4354, gma-miR1508c, bdi-miR5177, mtr-miR5216a, mtr-miR5216b, gma-miR5372, osa-miR5523, rgl-miR164, nta-miR6025d, ptc-miR6468-5p, ptc-miR6444…
C1 C1-B73 C1-I c1-I-2K1 Z438D03.27	46	zma-miR159a-5p, pta-miR390, osa-miR1872, mtr-miR2592b-5p, mtr-miR2592d-5p, mtr-miR2592e-5p, mtr-miR2592o-5p, mtr-miR2592q-5p, mtr-miR2592s-5p, mtr-miR2592a-5p, mtr-miR2628, mtr-miR2592t, mtr-miR2592u, mtr-miR2592v, mtr-miR2592w, mtr-miR2592x, mtr-miR2592y, mtr-miR2592z, mtr-miR2592ab, mtr-miR2592ac, mtr-miR2592ad, mtr-miR2592ae, mtr-miR2592af, mtr-miR2592ah, mtr-miR2592ai, mtr-miR2592aj, mtr-miR2…
At1g16830 F17F16.24	46	ath-miR159a, ath-miR159b-3p, osa-miR159a.1, osa-miR159b, zma-miR171a-5p, sbi-miR159a, sof-miR159a, sof-miR159b, sof-miR159d, sof-miR159e, gma-miR159a-3p, zma-miR159a-3p, zma-miR159b-3p, ptc-miR159a, ptc-miR159b, tae-miR159a, tae-miR159b, bna-miR159, vvi-miR159c, sly-miR159, bra-miR159a, mtr-miR159a, pvu-miR159a.1, zma-miR159f-3p, zma-miR159j-3p, zma-miR159k-3p, zma-miR171n-5p, rco-miR159, aly-miR…
KPNB1 At5g53480 MNC6.1	46	ath-miR162a-3p, ath-miR162b-3p, osa-miR162a, osa-miR162b, mtr-miR162, ptc-miR162a, ptc-miR162b, ghr-miR162a, cpa-miR162a, vvi-miR162, sly-miR162, sbi-miR1435b, osa-miR2907a, osa-miR2907b, osa-miR2907c, osa-miR2907d, sbi-miR162, csi-miR162-3p, rco-miR162, aly-miR162a-3p, aly-miR162b-3p, aly-miR395b-5p, aly-miR395c-5p, vvi-miR3628-3p, tcc-miR162, gma-miR162b, bdi-miR162, gma-miR162c, aau-miR162, rg…
MDHG	45	ath-miR161.2, osa-miR167h-3p, osa-miR171e-5p, zma-miR171d-5p, zma-miR167g-3p, zma-miR171e-5p, cre-miR1163.2, gma-miR1523a, zma-miR2275b-5p, mtr-miR2626, mtr-miR2630a, mtr-miR2630b, mtr-miR2630c, mtr-miR2630w, mtr-miR2630x, mtr-miR2630y, mtr-miR2630d, mtr-miR2630e, mtr-miR2630f, mtr-miR2630g, mtr-miR2630h, mtr-miR2630i, mtr-miR2630j, mtr-miR2630k, mtr-miR2630l, mtr-miR2630m, mtr-miR2630n, mtr-miR2…
MDHG	45	ath-miR156a-3p, ath-miR156b-3p, ath-miR156c-3p, osa-miR156c-3p, osa-miR156f-3p, osa-miR156g-3p, osa-miR156h-3p, osa-miR156j-3p, osa-miR156l-3p, zma-miR156d-3p, zma-miR156f-3p, zma-miR156g-3p, zma-miR156e-3p, zma-miR156a-3p, zma-miR156h-3p, zma-miR156i-3p, zma-miR156k-3p, mtr-miR156d-3p, mtr-miR156i-3p, zma-miR156l-3p, aly-miR156a-3p, aly-miR156b-3p, aly-miR156c-3p, osa-miR5158, bdi-miR156b-3p, bd…
TRX5 LIV1 At1g45145 F27F5.21	45	ath-miR394a, ath-miR394b-5p, osa-miR394, sbi-miR394a, zma-miR394a-5p, zma-miR394b-5p, ptc-miR394a-5p, ptc-miR394b-5p, vvi-miR394a, vvi-miR394b, vvi-miR394c, sbi-miR394b, ghr-miR394b, ghr-miR394a, aly-miR394a-5p, aly-miR394b-5p, ahy-miR394, gma-miR394b-5p, gma-miR394a-5p, csi-miR394, tcc-miR394a, tcc-miR394b, gma-miR394c-5p, bdi-miR394, ssl-miR394, gma-miR394d, gma-miR394e, gma-miR394f, bna-miR394…
SB09	45	ath-miR164b-3p, ath-miR171b-3p, ath-miR171c-3p, zma-miR171b-3p, zma-miR171f-3p, ptc-miR171a-3p, ptc-miR171b, mtr-miR171f, smo-miR171a, bna-miR171a, bna-miR171b, bna-miR171c, bna-miR171d, bna-miR171e, ptc-miR1447, osa-miR1848, sly-miR171b, bra-miR171a, bra-miR171b, bra-miR171c, bra-miR171d, bol-miR171a, rco-miR171a, rco-miR171b, ghr-miR2950, aly-miR164b-3p, aly-miR171b-3p, aly-miR171c-3p, tae-miR1…
NAC074 NAC8 Os01g0261200 LOC_Os01g15640 OsJ_01182 P0469E09.5 P0699D11.24	45	ath-miR398a-3p, ath-miR398b-3p, ath-miR398c-3p, osa-miR398a, osa-miR398b, gma-miR398a, gma-miR398b, ptc-miR398a, ptc-miR398b, ptc-miR398c-3p, mtr-miR398a-3p, mtr-miR398b, mtr-miR398c, vvi-miR398a, vvi-miR398b, vvi-miR398c, bol-miR398a-3p, aqc-miR398a, aqc-miR398b, csi-miR398, rco-miR398a, rco-miR398b, gra-miR398, ghr-miR398, aly-miR398a-3p, aly-miR398b-3p, ahy-miR398, vvi-miR3634-5p, tcc-miR398a,…
NAC074 NAC8 Os01g0261200 LOC_Os01g15640 OsJ_01182 P0469E09.5 P0699D11.24	44	ath-miR2111a-5p, ath-miR2111b-5p, bna-miR2111b-5p, bna-miR2111a-5p, mtr-miR2111c, mtr-miR2111d-5p, mtr-miR2111e-5p, mtr-miR2111g-5p, mtr-miR2111h, mtr-miR2111i, mtr-miR2111m-5p, mtr-miR2111n, mtr-miR2111o, mtr-miR2111b, mtr-miR2111j, mtr-miR2111k, aly-miR2111a-5p, aly-miR2111b-5p, lja-miR2111-5p, bra-miR2111a-5p, bra-miR2111b-5p, gma-miR4341, tcc-miR2111, mtr-miR2111f, mtr-miR2111a-5p, gma-miR211…
GLTP1 At2g33470 F4P9.24	44	ath-miR156h, osa-miR156k, sbi-miR156d, mtr-miR156a, gma-miR156b, zma-miR156j-5p, ath-miR865-3p, smo-miR156c, sly-miR171c, ppt-miR1023e-3p, zma-miR2118g, bdi-miR156a, mtr-miR2611, mtr-miR169j, rco-miR156e, aly-miR156h-5p, aly-miR395f-5p, ahy-miR156c, vvi-miR3629a-5p, gma-miR156f, far-miR156a, far-miR156b, tcc-miR156a, bdi-miR395e-5p, mtr-miR2600b, mtr-miR2600c, mtr-miR2600d, mtr-miR2600e, bra-miR5…
RPS2D At3g57490 T8H10.90	44	ath-miR162a-3p, ath-miR162b-3p, osa-miR162a, zma-miR162-3p, mtr-miR162, ptc-miR162a, ptc-miR162b, ghr-miR162a, ppt-miR1028b-3p, cpa-miR162a, vvi-miR162, gma-miR162a, osa-miR1847.1, sly-miR162, mtr-miR2588a, mtr-miR2588b, sbi-miR162, csi-miR162-3p, rco-miR162, aly-miR162a-3p, aly-miR162b-3p, tcc-miR162, gma-miR162b, bdi-miR162, gma-miR162c, aau-miR162, vun-miR162, bna-miR162a, nta-miR162a, nta-miR…
RPS2D At3g57490 T8H10.90	44	ath-miR403-3p, ptc-miR403a, ptc-miR403b, ptc-miR403c-3p, vvi-miR403a, vvi-miR403b, vvi-miR403c, vvi-miR403d, vvi-miR403e, vvi-miR403f, aqc-miR477d, rco-miR403a, rco-miR403b, ghr-miR482a, aly-miR395d-5p, aly-miR403a-3p, aly-miR3448-3p, ahy-miR3520-3p, csi-miR403, tcc-miR403a, tcc-miR403b, sly-miR482e-3p, mtr-miR5206b, bna-miR403, cca-miR6106-5p, hvu-miR6204, ptc-miR6460, htu-miR403a, htu-miR403b, …
AIRP2 At5g01520 F7A7_40	44	ath-miR403-3p, ptc-miR403a, ptc-miR403b, ptc-miR403c-3p, vvi-miR403a, vvi-miR403b, vvi-miR403c, vvi-miR403d, vvi-miR403e, vvi-miR403f, aqc-miR477d, rco-miR403a, rco-miR403b, ghr-miR482a, aly-miR395d-5p, aly-miR403a-3p, aly-miR3448-3p, ahy-miR3520-3p, csi-miR403, tcc-miR403a, tcc-miR403b, sly-miR482e-3p, mtr-miR5206b, bna-miR403, cca-miR6106-5p, hvu-miR6204, ptc-miR6460, htu-miR403a, htu-miR403b, …
SAMC2 At1g34065 F12G12.11	44	ath-miR403-3p, ptc-miR403a, ptc-miR403b, ptc-miR403c-3p, vvi-miR403a, vvi-miR403b, vvi-miR403c, vvi-miR403d, vvi-miR403e, vvi-miR403f, aqc-miR477d, rco-miR403a, rco-miR403b, ghr-miR482a, aly-miR395d-5p, aly-miR403a-3p, aly-miR3448-3p, ahy-miR3520-3p, csi-miR403, tcc-miR403a, tcc-miR403b, sly-miR482e-3p, mtr-miR5206b, bna-miR403, cca-miR6106-5p, hvu-miR6204, ptc-miR6460, htu-miR403a, htu-miR403b, …
SAMC2 At1g34065 F12G12.11	44	ath-miR394a, ath-miR394b-5p, osa-miR394, sbi-miR394a, zma-miR394a-5p, zma-miR394b-5p, ptc-miR394a-5p, ptc-miR394b-5p, vvi-miR394b, sbi-miR394b, ghr-miR394b, ghr-miR394a, aly-miR394a-5p, aly-miR394b-5p, ahy-miR394, gma-miR394b-5p, gma-miR394a-5p, csi-miR394, tcc-miR394a, tcc-miR394b, gma-miR394c-5p, bdi-miR394, pti-miR5482, ssl-miR394, gma-miR394d, gma-miR394e, gma-miR394f, bna-miR394a, bna-miR394…
RPS12	44	ath-miR167d, osa-miR167d-5p, osa-miR167e-5p, osa-miR167f, osa-miR167g, osa-miR167h-5p, osa-miR167i-5p, osa-miR167j, sbi-miR167d, sbi-miR167f, sbi-miR167g, sbi-miR167e, sbi-miR167c, sof-miR167a, sof-miR167b, zma-miR167e-5p, zma-miR167f-5p, zma-miR167g-5p, zma-miR167h-5p, zma-miR167i-5p, ptc-miR167e, vvi-miR167a, gma-miR167c, lja-miR167, sbi-miR167h, zma-miR167j-5p, gso-miR167a, csi-miR167c, csi-mi…
PCMP-H79 At3g49710 T16K5.60	44	ath-miR171a-3p, osa-miR171a, osa-miR171i-3p, zma-miR171a-3p, zma-miR171c-3p, ptc-miR171c, ptc-miR171d, ptc-miR171g-5p, ptc-miR171h-5p, ptc-miR171k, mtr-miR171b, mtr-miR171e-3p, bna-miR171g, bna-miR171f, vvi-miR171b, vvi-miR171e, vvi-miR171h, bra-miR171e, sbi-miR171g, sbi-miR171h, sbi-miR171j, bdi-miR171a, zma-miR171l-3p, zma-miR171m-3p, zma-miR171n-3p, ccl-miR171, rco-miR171g, aly-miR171a-3p, tcc…
EMB506 At5g40160 MSN9.60	44	ath-miR171b-3p, ath-miR171c-3p, zma-miR171b-3p, zma-miR171f-3p, ptc-miR171a-3p, ptc-miR171b, mtr-miR171f, smo-miR171a, smo-miR171b, bna-miR171a, bna-miR171b, bna-miR171c, bna-miR171d, bna-miR171e, gma-miR171a, sly-miR171b, bra-miR171a, bra-miR171b, bra-miR171c, bra-miR171d, bol-miR171a, rco-miR171a, rco-miR171b, aly-miR171b-3p, aly-miR171c-3p, tae-miR171b, gma-miR4367, gma-miR171c-3p, gma-miR171i…
STR16 At5g66040 K2A18.11	44	ath-miR162a-5p, ath-miR162b-5p, ath-miR828, ppt-miR1038-5p, vvi-miR828a, mtr-miR2655a, mtr-miR2655b, mtr-miR2655c, mtr-miR2655d, mtr-miR2655e, mtr-miR2655f, mtr-miR2655g, mtr-miR2655h, mtr-miR2655i, mtr-miR2655j, mtr-miR2655k, mtr-miR2655l, mtr-miR2655m, mtr-miR2655n, mtr-miR2655o, csi-miR162-5p, aly-miR162a-5p, aly-miR162b-5p, aly-miR828-5p, tae-miR5086, gma-miR5368, pti-miR5481, ssl-miR828, gma…
BRG3 At3g12920 MGH6.3	44	ath-miR162a-5p, ath-miR162b-5p, ath-miR828, ppt-miR1038-5p, vvi-miR828a, mtr-miR2655a, mtr-miR2655b, mtr-miR2655c, mtr-miR2655d, mtr-miR2655e, mtr-miR2655f, mtr-miR2655g, mtr-miR2655h, mtr-miR2655i, mtr-miR2655j, mtr-miR2655k, mtr-miR2655l, mtr-miR2655m, mtr-miR2655n, mtr-miR2655o, csi-miR162-5p, aly-miR162a-5p, aly-miR162b-5p, aly-miR828-5p, tae-miR5086, gma-miR5368, pti-miR5481, ssl-miR828, gma…
At2g45070 T14P1.12	43	ath-miR399b, ath-miR399c-3p, osa-miR399d, sbi-miR399d, zma-miR399e-3p, sbi-miR399i, mtr-miR399l, mtr-miR399p, ppt-miR902k-3p, vvi-miR399b, ptc-miR1448, vvi-miR399c, vvi-miR399i, pvu-miR482-3p, pvu-miR399a, zma-miR399i-3p, zma-miR399j-3p, rco-miR399a, gra-miR482, aly-miR399b-3p, aly-miR399c-3p, vvi-miR3633a-3p, csi-miR399d, tcc-miR399a, tcc-miR399i, sly-miR482a, vun-miR399a, gma-miR399a, gma-miR39…
At2g45070 T14P1.12	43	ath-miR162a-3p, ath-miR162b-3p, osa-miR162a, osa-miR162b, zma-miR162-3p, mtr-miR162, ptc-miR162a, ptc-miR162b, ghr-miR162a, ppt-miR414, ppt-miR1223h, ppt-miR1223i, cpa-miR162a, vvi-miR162, gma-miR162a, sly-miR162, sbi-miR162, csi-miR162-3p, rco-miR162, aly-miR162a-3p, aly-miR162b-3p, tcc-miR162, gma-miR162b, osa-miR5075, bdi-miR162, gma-miR162c, aau-miR162, vun-miR162, nta-miR162a, nta-miR162b, h…
ZBP14 PKCI	43	osa-miR160a-3p, osa-miR160b-3p, osa-miR160c-3p, zma-miR160d-3p, zma-miR160b-3p, zma-miR166g-5p, osa-miR821a, osa-miR821b, osa-miR821c, osa-miR1871, osa-miR827, osa-miR2876-5p, zma-miR160g-3p, zma-miR827-3p, ghr-miR827a, ghr-miR827b, ghr-miR827c, aly-miR827-3p, gma-miR4369, csi-miR827, tcc-miR827, osa-miR5073, bdi-miR166d-5p, bdi-miR160b-3p, bdi-miR160c-3p, bdi-miR160d-3p, bdi-miR827-3p, bdi-miR16…
RPL19B At3g16780 MGL6.25	43	ath-miR398a-3p, ath-miR398b-3p, ath-miR398c-3p, osa-miR398a, gma-miR398a, gma-miR398b, ptc-miR398a, ptc-miR472b, mtr-miR398a-3p, vvi-miR398a, osa-miR444b.2, osa-miR444c.2, gma-miR1515a, bol-miR398a-3p, aqc-miR398a, zma-miR398a-3p, zma-miR398b-3p, sbi-miR398, csi-miR398, rco-miR398a, gra-miR398, ghr-miR398, aly-miR398a-3p, aly-miR398b-3p, ahy-miR398, tae-miR398, tcc-miR398b, ssp-miR444c-3p, zma-mi…
Os02g0639900 LOC_Os02g42700 OsJ_07676 P0010C01.26	42	ath-miR2111a-5p, ath-miR2111b-5p, bna-miR2111b-5p, bna-miR2111a-5p, mtr-miR2111c, mtr-miR2111d-5p, mtr-miR2111e-5p, mtr-miR2111g-5p, mtr-miR2111h, mtr-miR2111i, mtr-miR2111m-5p, mtr-miR2111n, mtr-miR2111o, mtr-miR2111b, mtr-miR2111j, mtr-miR2111k, aly-miR2111a-5p, aly-miR2111b-5p, lja-miR2111-5p, bra-miR2111a-5p, bra-miR2111b-5p, gma-miR4341, tcc-miR2111, mtr-miR2111f, mtr-miR2111a-5p, gma-miR211…
DGK5 At2g20900 F5H14.13	42	ath-miR403-3p, ptc-miR403a, ptc-miR403b, ptc-miR403c-3p, pta-miR171, ppt-miR902i-3p, ppt-miR902j-3p, ppt-miR902k-3p, vvi-miR403a, vvi-miR403b, vvi-miR403c, vvi-miR403d, vvi-miR403e, vvi-miR403f, rco-miR403a, rco-miR403b, aly-miR403a-3p, gma-miR4397-5p, csi-miR403, tcc-miR403a, tcc-miR403b, mtr-miR5216a, mtr-miR5216b, gma-miR403a, gma-miR403b, bna-miR403, htu-miR403a, htu-miR403b, htu-miR403c, htu…
ZAR1 At2g01210 F10A8.9	42	ath-miR408-3p, osa-miR408-3p, sof-miR408a, sof-miR408b, sof-miR408c, sof-miR408d, sof-miR408e, zma-miR408a, ptc-miR408-3p, ppt-miR408a, pta-miR408, ppt-miR408b, smo-miR408, tae-miR408, vvi-miR408, sbi-miR408, zma-miR408b-3p, rco-miR408, aly-miR408-3p, ahy-miR408-3p, vvi-miR3638-5p, csi-miR408, gma-miR408d, bdi-miR408-3p, ssp-miR408d, ssp-miR408a, gma-miR408a-3p, gma-miR408b-3p, gma-miR408c-3p, mt…
SNAT1 NSI OsI_019680 OsI_20361	42	ath-miR399f, ptc-miR399b, ptc-miR399j, ath-miR829-3p.2, mtr-miR169c, bna-miR399a, ppt-miR1025, vvi-miR399e, osa-miR1869, zma-miR399g-3p, sbi-miR399k, rco-miR399b, rco-miR399c, aly-miR399a-3p, aly-miR399h-3p, vvi-miR3638-3p, csi-miR399a, tcc-miR399b, tcc-miR399d, bdi-miR5198, gma-miR169n-5p, bra-miR5654a, bra-miR5654b, bna-miR399b, bna-miR399c, nta-miR6145b, hme-miR-285, mdm-miR399e, mdm-miR399f, …
LOC_Os07g01090 B1026C12.12	42	ath-miR408-3p, osa-miR408-3p, zma-miR164a-3p, sof-miR408a, sof-miR408b, sof-miR408c, sof-miR408d, zma-miR408a, ptc-miR408-3p, pta-miR408, ppt-miR408b, smo-miR408, tae-miR408, vvi-miR408, sbi-miR408, zma-miR408b-3p, rco-miR408, aly-miR408-3p, ahy-miR408-3p, csi-miR408, gma-miR408d, bdi-miR408-3p, ssp-miR408d, ssp-miR408a, gma-miR408a-3p, gma-miR408b-3p, gma-miR408c-3p, mtr-miR408-3p, vun-miR408, d…
LOC_Os07g01090 B1026C12.12	42	ath-miR162a-3p, ath-miR162b-3p, osa-miR162a, zma-miR162-3p, mtr-miR162, ptc-miR162a, ptc-miR162b, ath-miR472-5p, ghr-miR162a, ddi-miR-1177, cpa-miR162a, vvi-miR162, gma-miR162a, sly-miR162, sbi-miR162, csi-miR162-3p, ath-miR2938, rco-miR162, aly-miR162a-3p, aly-miR162b-3p, aly-miR472-5p, tcc-miR162, gma-miR162b, bdi-miR162, mtr-miR5229a, mtr-miR5229b, gma-miR162c, aau-miR162, vun-miR162, nta-miR1…
NFD6 At2g20585 F23N11	42	ath-miR162a-3p, ath-miR162b-3p, osa-miR162a, zma-miR162-3p, mtr-miR162, ptc-miR162a, ptc-miR162b, ghr-miR162a, cpa-miR162a, vvi-miR162, osa-miR444f, gma-miR162a, sly-miR162, mtr-miR1509a-3p, sbi-miR162, csi-miR162-3p, rco-miR162, aly-miR162a-3p, aly-miR162b-3p, tcc-miR162, gma-miR162b, ssp-miR444a, ssp-miR444b.2, bdi-miR162, gma-miR162c, aau-miR162, vun-miR162, mtr-miR5740, nta-miR162a, nta-miR16…
ACC1 Os10g0363300 LOC_Os10g21910 OsJ_31236 OSJNBa0073L01.2	42	ath-miR171b-5p, zma-miR171c-5p, ath-miR840-3p, pta-miR946a-5p, ath-miR2111b-3p, bna-miR2111b-3p, bdi-miR171c-5p, mtr-miR2610a, mtr-miR2610b, osa-miR2922, aly-miR170-3p, aly-miR171b-5p, aly-miR825-3p, aly-miR840-3p, aly-miR2111b-3p, gma-miR4998, osa-miR5161, bdi-miR5171a, mtr-miR5251, mtr-miR5285a, mtr-miR5285b, mtr-miR5285c, osa-miR5512a, ath-miR5654-3p, cca-miR6108f, osa-miR5512b, hme-miR-3286, …
ACC2 At1g36180 F15C21.2	41	ath-miR168a-5p, ath-miR168b-5p, sof-miR159e, sof-miR159e, gma-miR168a, ptc-miR168a-5p, ptc-miR168b-5p, pta-miR159b, pta-miR159b, bna-miR168a, vvi-miR168, aqu-miR-2016-3p, ccl-miR168, crt-miR168, rco-miR168, aly-miR168a-5p, aly-miR168b-5p, tcc-miR168, gma-miR168b, osa-miR5161, osa-miR5161, cme-miR168, mtr-miR168b, mtr-miR168c-5p, vun-miR168, mes-miR168a, cca-miR168a, nta-miR168a, nta-miR168b, nta-…
ACC2 At1g36180 F15C21.2	41	ath-miR172b-5p, ath-miR169d, ath-miR169e, ath-miR169f-5p, ath-miR169g-5p, ath-miR172e-5p, ptc-miR169n-5p, mtr-miR169e-5p, mtr-miR169h, bna-miR169m, vvi-miR169m, vvi-miR169p, vvi-miR169r, vvi-miR169u, vvi-miR169b, vvi-miR169h, vvi-miR169l, vvi-miR169n, vvi-miR169o, vvi-miR169q, bra-miR172b-5p, rco-miR169c, aly-miR169d-5p, aly-miR169e-5p, aly-miR169f-5p, aly-miR169g-5p, aly-miR172e-5p, gma-miR169d,…
PSAE-1; PSAE-2	41	ath-miR403-3p, ptc-miR403a, ptc-miR403b, ptc-miR403c-3p, vvi-miR403a, vvi-miR403b, vvi-miR403c, vvi-miR403d, vvi-miR403e, vvi-miR403f, rco-miR403a, rco-miR403b, aly-miR403a-3p, gma-miR4387c, csi-miR403, tcc-miR403a, tcc-miR403b, gma-miR1516b, osa-miR5150-3p, gma-miR403a, gma-miR403b, osa-miR5505, bna-miR403, hvu-miR6200, htu-miR403a, htu-miR403b, htu-miR403c, htu-miR403d, htu-miR403e, har-miR403a…
PSAE	41	ath-miR319c, mtr-miR319a-3p, gma-miR319a, gma-miR319b, gma-miR319c, ptc-miR319a, ptc-miR319b, ptc-miR319c, ptc-miR319d, ptc-miR319e, ptc-miR319f, ptc-miR319g, ptc-miR319h, ppt-miR319a, ppt-miR319b, mtr-miR319b-3p, pta-miR319, sly-miR319a, mtr-miR1510b-3p, pvu-miR319c, ctr-miR319, rco-miR319d, aly-miR319c-3p, aly-miR319d-3p, gma-miR319e, mtr-miR160f, gma-miR319g, gma-miR319l, hvu-miR6189, cme-miR3…
PSAE-1; PSAE-2	41	ath-miR403-3p, ptc-miR403a, ptc-miR403b, ptc-miR403c-3p, ath-miR860, ppt-miR1073-3p, smo-miR536, cre-miR1143-3p, vvi-miR403a, vvi-miR403b, vvi-miR403c, vvi-miR403d, vvi-miR403e, vvi-miR403f, osa-miR2874, rco-miR403a, rco-miR403b, aly-miR403a-3p, csi-miR403, tcc-miR403a, tcc-miR403b, gma-miR403a, gma-miR403b, bna-miR403, osa-miR5337b, htu-miR403a, htu-miR403b, htu-miR403c, htu-miR403d, htu-miR403e…
DHQS AROB	41	ath-miR391-5p, ath-miR164c-3p, osa-miR415, osa-miR395v, osa-miR1432-5p, ppt-miR2082, sbi-miR1432, mtr-miR2628, zma-miR1432-5p, aly-miR391-5p, vvi-miR3627-5p, gma-miR4376-5p, ath-miR5012, mtr-miR5211, mtr-miR5225a, sly-miR4376, mtr-miR5225b, mtr-miR5225c, gma-miR5225, gma-miR5786, ptc-miR3627a, mdm-miR3627a, mdm-miR3627b, mdm-miR3627c, mdm-miR391, mdm-miR5225c, mdm-miR5225a, mdm-miR5225b, bdi-miR7…
UBC7 At5g59300 MNC17.21	40	osa-miR530-5p, ppt-miR1030a, ppt-miR1030b, ppt-miR1030c, ppt-miR1030d, ppt-miR1030e, ppt-miR1030f, ppt-miR1030g, ppt-miR1030h, ppt-miR1030i, ppt-miR1030j, osa-miR169r-3p, ptc-miR530a, ptc-miR530b, aqc-miR530, zma-miR169n-3p, zma-miR169o-3p, osa-miR2918, pab-miR3693, csi-miR530a, tcc-miR530a, tcc-miR530b, gma-miR530a, gma-miR530b, mtr-miR530, gma-miR530c, gma-miR530d, gma-miR530e, hme-miR-2797, ht…
	40	zma-miR166h-3p, zma-miR166e, zma-miR166i-3p, zma-miR166f, zma-miR166g-3p, zma-miR166b-3p, zma-miR166c-3p, zma-miR166d-3p, sbi-miR166d, sbi-miR166c, sbi-miR166b, sbi-miR166a, ptc-miR166p, vvi-miR166a, vvi-miR166b, osa-miR1430, sbi-miR166h, sbi-miR166i, sbi-miR166j, crt-miR166a, csi-miR166b, csi-miR166c, tcc-miR166b, hvu-miR5052, bra-miR5724, gma-miR166p, gma-miR166q, gma-miR166r, gma-miR166s, gma-…
	40	ath-miR162a-3p, ath-miR162b-3p, osa-miR162a, zma-miR162-3p, mtr-miR162, ptc-miR162a, ptc-miR162b, ghr-miR162a, cpa-miR162a, vvi-miR162, gma-miR162a, sly-miR162, sbi-miR162, csi-miR162-3p, rco-miR162, aly-miR162a-3p, aly-miR162b-3p, aly-miR851-5p, gma-miR4363, tcc-miR162, gma-miR162b, bdi-miR5175b, bdi-miR162, gma-miR162c, aau-miR162, vun-miR162, gma-miR5785, nta-miR6020a-5p, nta-miR162a, nta-miR1…
PRXQ	40	ath-miR162a-3p, ath-miR162b-3p, osa-miR162a, zma-miR162-3p, mtr-miR162, ptc-miR162a, ptc-miR162b, ghr-miR162a, cpa-miR162a, vvi-miR162, gma-miR162a, sly-miR162, sbi-miR162, csi-miR162-3p, rco-miR162, aly-miR162a-3p, aly-miR162b-3p, aly-miR851-5p, gma-miR4363, tcc-miR162, gma-miR162b, bdi-miR5175b, bdi-miR162, gma-miR162c, aau-miR162, vun-miR162, gma-miR5785, nta-miR6020a-5p, nta-miR162a, nta-miR1…
PRXQ	40	ath-miR162a-3p, ath-miR162b-3p, osa-miR162a, zma-miR162-3p, mtr-miR162, ptc-miR162a, ptc-miR162b, ghr-miR162a, cpa-miR162a, vvi-miR162, gma-miR162a, sly-miR162, mtr-miR2677, sbi-miR162, csi-miR162-3p, rco-miR162, aly-miR162a-3p, aly-miR162b-3p, aly-miR163-5p.1, tcc-miR162, gma-miR162b, bdi-miR162, gma-miR162c, aau-miR162, vun-miR162, osa-miR5794, bna-miR162a, nta-miR162a, nta-miR162b, pde-miR162,…
XTH32 At2g36870 T1J8.5	40	ath-miR397a, osa-miR397a, ptc-miR397a, ptc-miR397b, vvi-miR397a, sly-miR397, sbi-miR397-5p, bdi-miR397a, mtr-miR2652a, mtr-miR2652b, mtr-miR2652c, mtr-miR2652d, mtr-miR2652e, mtr-miR2652f, mtr-miR2652g, mtr-miR2652h, mtr-miR2652i, mtr-miR2652j, mtr-miR2652k, mtr-miR2652l, rco-miR397, aly-miR397a-5p, aly-miR397b-5p, hvu-miR397a, csi-miR397, tcc-miR397, ath-miR5016, gma-miR397a, gma-miR397b-5p, mtr…
KIN14L Os06g0217600 LOC_Os06g11380 OsJ_20602 OSJNBb0024N18.29	40	ath-miR393a-3p, zma-miR172b-3p, zma-miR172c-3p, sbi-miR172a, osa-miR437, ptc-miR172i, mtr-miR172a, sbi-miR437a, sbi-miR437b, sbi-miR437c, sbi-miR437d, sbi-miR437e, sbi-miR437f, sbi-miR437g, sbi-miR437i, sbi-miR437j, sbi-miR437k, sbi-miR437l, sbi-miR437m, sbi-miR437n, sbi-miR437o, sbi-miR437p, sbi-miR437q, sbi-miR437r, sbi-miR437s, sbi-miR437t, sbi-miR437u, sbi-miR437v, sbi-miR437w, bdi-miR172d, s…
SUMO2 SUM2 At5g55160 MCO15.11	40	ath-miR162a-3p, ath-miR162b-3p, osa-miR162a, zma-miR162-3p, mtr-miR162, ptc-miR162a, ptc-miR162b, ghr-miR162a, cpa-miR162a, vvi-miR162, gma-miR162a, sly-miR162, sbi-miR162, csi-miR162-3p, rco-miR162, aly-miR162a-3p, aly-miR162b-3p, tcc-miR162, gma-miR162b, bdi-miR162, mtr-miR5284b, gma-miR162c, aau-miR162, vun-miR162, nta-miR6019a, nta-miR6019b, nta-miR162a, nta-miR162b, nta-miR6145d, hme-miR-279…
SUMO2 SUM2 At5g55160 MCO15.11	39	ath-miR390a-3p, ath-miR390b-3p, osa-miR156k, osa-miR156l-5p, osa-miR166g-5p, sbi-miR156d, mtr-miR156a, gma-miR156b, zma-miR156j-5p, gma-miR390a-3p, vvi-miR156h, bdi-miR156a, mtr-miR2609a, mtr-miR2609b, rco-miR156e, aly-miR390a-3p, aly-miR390b-3p, ahy-miR156a, ahy-miR156c, far-miR156a, far-miR156b, tcc-miR156a, gma-miR390c, ath-miR156i, ath-miR156j, hme-miR-281, hpa-miR156a, har-miR156c, mdm-miR15…
SUMO2 SUM2 At5g55160 MCO15.11	39	mtr-miR2592b-3p, mtr-miR2592c, mtr-miR2592d-3p, mtr-miR2592e-3p, mtr-miR2592f, mtr-miR2592i, mtr-miR2592j, mtr-miR2592o-3p, mtr-miR2592p, mtr-miR2592q-3p, mtr-miR2592r, mtr-miR2592a.2-3p, mtr-miR2592g, mtr-miR2592h, mtr-miR2592k, mtr-miR2592l, mtr-miR2592m, mtr-miR2592n, osa-miR2865, bdi-miR5185a-5p, bdi-miR5185b-5p, mtr-miR2592an, mtr-miR2592ao, bna-miR6030, mtr-miR2592bo-3p, mtr-miR2592bp-5p, m…
MOCS2 OsI_005657	39	ath-miR168a-5p, ath-miR168b-5p, gma-miR168a, ptc-miR168a-5p, ptc-miR168b-5p, ptc-miR171h-5p, ath-miR840-5p, smo-miR1090, bna-miR168a, vvi-miR168, gma-miR390b-3p, osa-miR1854-3p, gma-miR2109-3p, mtr-miR2617a, mtr-miR2617c, mtr-miR2617b, ccl-miR168, crt-miR168, rco-miR168, aly-miR168a-5p, aly-miR168b-5p, ath-miR3434-5p, tcc-miR168, mtr-miR5212-3p, mtr-miR168b, mtr-miR168c-5p, vun-miR168, bna-miR168…
VAMP727 At3g54300 F24B22.260	39	ath-miR169g-3p, ath-miR408-3p, osa-miR408-3p, sof-miR408a, sof-miR408b, sof-miR408c, sof-miR408d, zma-miR167g-3p, zma-miR408a, ptc-miR408-3p, pta-miR408, ppt-miR1039-3p, tae-miR408, vvi-miR408, sbi-miR408, zma-miR408b-3p, osa-miR2907a, osa-miR2907b, osa-miR2907c, osa-miR2907d, rco-miR408, aly-miR408-3p, ahy-miR408-3p, csi-miR408, gma-miR408d, bdi-miR408-3p, ssp-miR408d, ssp-miR408a, gma-miR408a-3…
VAMP727 At3g54300 F24B22.260	39	ptc-miR477a-5p, ptc-miR477b, ppt-miR535a, ppt-miR535b, ppt-miR535c, osa-miR535-5p, ppt-miR535d, smo-miR1106, tae-miR1121, vvi-miR535a, vvi-miR535b, vvi-miR535c, gma-miR1511, zma-miR164f-3p, rco-miR535, pab-miR535, gma-miR1520f-3p, gma-miR4388, osa-miR3979-5p, ath-miR5014a-3p, rgl-miR5139, osa-miR5156, bdi-miR319b-5p, hme-miR-124, mdm-miR535a, mdm-miR7126, mdm-miR1511, mes-miR535a, mtr-miR319d-5p,…
At1g29970 T1P2.8	38	zma-miR166h-3p, zma-miR166e, zma-miR166i-3p, zma-miR166f, zma-miR166g-3p, zma-miR166b-3p, zma-miR166c-3p, zma-miR166d-3p, sbi-miR166d, sbi-miR166c, sbi-miR166b, sbi-miR166a, ptc-miR166p, vvi-miR166a, vvi-miR166b, osa-miR1430, sbi-miR166h, sbi-miR166i, sbi-miR166j, crt-miR166a, csi-miR166b, csi-miR166c, tcc-miR166b, gma-miR166p, gma-miR166q, gma-miR166r, gma-miR166s, gma-miR166t, hbr-miR166a, pde-…
MAP1B At1g13270 T6J4.3	38	ath-miR162a-3p, ath-miR162b-3p, osa-miR162a, zma-miR162-3p, mtr-miR162, ptc-miR162a, ptc-miR162b, ghr-miR162a, cpa-miR162a, vvi-miR162, gma-miR162a, sly-miR162, ppt-miR2077, sbi-miR162, csi-miR162-3p, rco-miR162, aly-miR162a-3p, aly-miR162b-3p, tcc-miR162, gma-miR162b, bdi-miR162, gma-miR162c, aau-miR162, osa-miR5544, vun-miR162, nta-miR162a, nta-miR162b, pde-miR162, htu-miR162a, hpe-miR162a, mdm…
MAP1B At1g13270 T6J4.3	38	ath-miR168a-5p, ath-miR168b-5p, gma-miR168a, ptc-miR168a-5p, ptc-miR168b-5p, ptc-miR171h-5p, ath-miR840-5p, smo-miR1090, bna-miR168a, vvi-miR168, gma-miR390b-3p, osa-miR1854-3p, gma-miR2109-3p, mtr-miR2617a, mtr-miR2617c, mtr-miR2617b, ccl-miR168, crt-miR168, rco-miR168, aly-miR168a-5p, aly-miR168b-5p, ath-miR3434-5p, tcc-miR168, mtr-miR5212-3p, mtr-miR168b, mtr-miR168c-5p, vun-miR168, bna-miR168…
ERF11 ERF-11 ERF076 At1g28370 F3M18.20	38	ath-miR168a-5p, ath-miR168b-5p, gma-miR168a, ptc-miR168a-5p, ptc-miR168b-5p, bna-miR168a, vvi-miR168, osa-miR1436, ccl-miR168, crt-miR168, rco-miR168, aly-miR168a-5p, aly-miR168b-5p, hvu-miR1436, tcc-miR168, gma-miR168b, cme-miR168, mtr-miR168b, mtr-miR168c-5p, vun-miR168, osa-miR5832, bna-miR168b, mes-miR168a, cca-miR168a, nta-miR168a, nta-miR168b, nta-miR168c, nta-miR168d, nta-miR168e, hme-miR-…
ERF11 ERF-11 ERF076 At1g28370 F3M18.20	38	osa-miR166e-3p, zma-miR166h-3p, zma-miR166e, zma-miR166i-3p, zma-miR166f, zma-miR166g-3p, zma-miR166b-3p, zma-miR166c-3p, zma-miR166d-3p, sbi-miR166d, sbi-miR166c, sbi-miR166b, sbi-miR166a, ptc-miR166n, ptc-miR166o, ptc-miR166q, vvi-miR166a, vvi-miR166b, osa-miR1437a, sbi-miR166h, sbi-miR166i, sbi-miR166j, sbi-miR166k, aqc-miR166c, pab-miR166b, csi-miR166c, tcc-miR166b, gma-miR166p, gma-miR166q, …
ERF8 ERF-8 ERF079 At1g53170 F12M16.6	38	ath-miR408-3p, osa-miR408-3p, sof-miR408a, sof-miR408b, sof-miR408c, sof-miR408d, zma-miR408a, ptc-miR408-3p, pta-miR408, ppt-miR408b, smo-miR408, tae-miR408, vvi-miR408, sbi-miR408, zma-miR408b-3p, rco-miR408, aly-miR408-3p, ahy-miR408-3p, csi-miR408, gma-miR408d, bdi-miR408-3p, ssp-miR408d, ssp-miR408a, gma-miR408a-3p, gma-miR408b-3p, gma-miR408c-3p, mtr-miR408-3p, vun-miR408, dpr-miR408, mes-m…
ERF3 ERF-3 ERF082 At1g50640 F11F12.4 F17J6.16	37	ath-miR169d, ath-miR169e, ath-miR169f-5p, ath-miR169g-5p, ptc-miR169n-5p, vvi-miR169r, vvi-miR169u, vvi-miR169b, vvi-miR169h, sly-miR397, mtr-miR2086-3p, mtr-miR169j, rco-miR169c, aly-miR169d-5p, aly-miR169e-5p, aly-miR169f-5p, aly-miR169g-5p, gma-miR169d, gma-miR169e, csi-miR396c, tcc-miR169m, mtr-miR5261, mtr-miR5261, aau-miR2086, amg-miR2086, bra-miR5719, gma-miR169p, hme-miR-308, cme-miR169k,…
Os05g0200100 LOC_Os05g11090 OSJNBa0017O06.11	37	ath-miR408-3p, osa-miR408-3p, sof-miR408a, sof-miR408b, sof-miR408c, sof-miR408d, zma-miR408a, ptc-miR408-3p, pta-miR408, ppt-miR408b, smo-miR408, tae-miR408, vvi-miR408, sbi-miR408, zma-miR408b-3p, rco-miR408, aly-miR408-3p, ahy-miR408-3p, csi-miR408, gma-miR408d, bdi-miR408-3p, ssp-miR408d, ssp-miR408a, gma-miR408a-3p, gma-miR408b-3p, gma-miR408c-3p, mtr-miR408-3p, vun-miR408, dpr-miR408, mes-m…
RCD1 ATP8 CEO1 At1g32230 F3C3.1	37	osa-miR160c-3p, ppt-miR900-5p, ppt-miR1077-5p, sbi-miR1435b, mtr-miR2650, osa-miR2918, osa-miR812n-5p, bdi-miR160d-3p, bdi-miR5185a-3p, bdi-miR5185b-3p, mtr-miR5209, mtr-miR5291a, mtr-miR5291b, mtr-miR5291c, sly-miR5303, gma-miR5672, mtr-miR5741a, mtr-miR5741b, mtr-miR5741c, mtr-miR5741d, mtr-miR5741e, cca-miR6108e-3p, hvu-miR6204, ptc-miR6466-3p, bdi-miR5185c-3p, bdi-miR5185d-3p, bdi-miR5185e-3p…
RCD1 ATP8 CEO1 At1g32230 F3C3.1	37	ptc-miR169b-3p, mtr-miR156d-3p, ghr-miR399a, ghr-miR399b, cre-miR908.1, ppt-miR1032, ppt-miR1061-5p, tae-miR1137a, aqu-miR-2015-3p, osa-miR2878-5p, zma-miR482-3p, ahy-miR3515, gma-miR1520f-5p, gma-miR394b-3p, csi-miR3952, bdi-miR169c-3p, mtr-miR5286b, ath-miR5649a, ath-miR5649b, ath-miR5663-3p, vun-miR164, gma-miR5773, osa-miR5808, hbr-miR6173, ptc-miR6474, hbr-miR476, sbi-miR6227-3p, bdi-miR159b…
PYRD GRMZM2G320099	37	pta-miR946a-5p, mtr-miR2630a, mtr-miR2630b, mtr-miR2630c, mtr-miR2630w, mtr-miR2630x, mtr-miR2630y, mtr-miR2630d, mtr-miR2630e, mtr-miR2630g, mtr-miR2630h, mtr-miR2630i, mtr-miR2630j, mtr-miR2630k, mtr-miR2630l, mtr-miR2630m, mtr-miR2630n, mtr-miR2630o, mtr-miR2630p, mtr-miR2630q, mtr-miR2630r, mtr-miR2630t, mtr-miR2630u, mtr-miR2630v, mtr-miR2671j, mtr-miR2671a, mtr-miR2671b, mtr-miR2671c, mtr-m…
LPXC2 At1g24880 F5A9.14	36	osa-miR408-3p, sof-miR408a, sof-miR408b, sof-miR408c, sof-miR408d, zma-miR408a, osa-miR530-3p, ppt-miR408b, smo-miR408, tae-miR408, sbi-miR408, mtr-miR2671j, mtr-miR2671a, mtr-miR2671b, mtr-miR2671c, mtr-miR2671d, mtr-miR2671e, mtr-miR2671f, mtr-miR2671g, mtr-miR2671h, mtr-miR2671i, zma-miR408b-3p, rco-miR408, aly-miR3445-5p.2, gma-miR408d, bdi-miR408-3p, ssp-miR408d, ssp-miR408a, dpr-miR408, cca…
BZR3 Os06g0552300 LOC_Os06g35900 P0427B07.9	36	ath-miR846-3p, ptc-miR171l-3p, ptc-miR171l-3p, ptc-miR171m, ptc-miR171m, ptc-miR171j, ptc-miR171j, gma-miR171b-3p, gma-miR171b-3p, vvi-miR171g, aly-miR846-3p, aly-miR3449-5p, esi-miR3469-3p, aly-miR4241, csi-miR171b, csi-miR171b, osa-miR5144-5p, bdi-miR5181d, mtr-miR171h, mtr-miR171h, mtr-miR5278, mtr-miR2590h, mtr-miR2590i, mtr-miR2590j, mtr-miR171g, mtr-miR171g, gma-miR171r, gma-miR171r, gma-mi…
Os01g0252200 LOC_Os01g14870 OsJ_01120	36	osa-miR437, sbi-miR437a, sbi-miR437b, sbi-miR437c, sbi-miR437d, sbi-miR437e, sbi-miR437f, sbi-miR437g, sbi-miR437i, sbi-miR437j, sbi-miR437k, sbi-miR437l, sbi-miR437m, sbi-miR437n, sbi-miR437o, sbi-miR437p, sbi-miR437q, sbi-miR437r, sbi-miR437s, sbi-miR437t, sbi-miR437u, sbi-miR437v, sbi-miR437w, mtr-miR2590a, mtr-miR2590b, mtr-miR2590c, mtr-miR2590d, mtr-miR2590e, mtr-miR2590f, aly-miR163-3p.2, …
GNT2 At2g05320 F5G3.22	36	ath-miR171b-3p, ath-miR171c-3p, zma-miR171b-3p, ptc-miR171a-3p, ptc-miR171b, mtr-miR171f, smo-miR171a, bna-miR171a, bna-miR171b, bna-miR171c, bna-miR171d, bna-miR171e, sly-miR171b, bra-miR171a, bra-miR171b, bra-miR171c, bra-miR171d, bol-miR171a, rco-miR171a, rco-miR171b, aly-miR171b-3p, aly-miR171c-3p, aly-miR3447-5p, tae-miR171b, gma-miR4376a-3p, gma-miR171i-3p, gma-miR5670a, ssl-miR171a, mdm-mi…
APS1 APS-1(1)	36	osa-miR166c-5p, ppt-miR1023a-3p, ppt-miR1039-3p, smo-miR156d, smo-miR1101-3p, ptc-miR1448, aqu-miR-2021-5p, bdi-miR399a, mtr-miR2640, mtr-miR2661, aly-miR856-5p, ahy-miR408-5p, aly-miR4247, osa-miR5338, gma-miR397b-3p, gma-miR166i-5p, osa-miR5514, sbi-miR5565a, sbi-miR5565b, ath-miR5638a, ath-miR5662, ssl-miR399, gma-miR6299, hme-miR-2733, ptc-miR6438b, ptc-miR6438a, hbr-miR156, sbi-miR6224a-3p, …
AVT6E At1g80510 T21F11.16	36	ath-miR391-5p, osa-miR1432-5p, sbi-miR1432, zma-miR1432-5p, aly-miR391-5p, vvi-miR3627-5p, gma-miR4376-5p, gma-miR394b-3p, ssp-miR1432, mtr-miR5211, mtr-miR5225a, mtr-miR5225a, mtr-miR5558-5p, sly-miR4376, mtr-miR5225b, mtr-miR5225c, gma-miR5225, gma-miR5786, osa-miR5831, ptc-miR3627a, mdm-miR3627a, mdm-miR3627b, mdm-miR3627c, mdm-miR391, mdm-miR5225c, mdm-miR5225a, mdm-miR5225b, ptc-miR3627b, st…
HIPP39 At1g01490 F22L4.5	36	osa-miR1851, mtr-miR2609a, mtr-miR2609b, mtr-miR1509b, mtr-miR2630a, mtr-miR2630b, mtr-miR2630c, mtr-miR2630w, mtr-miR2630x, mtr-miR2630y, mtr-miR2630d, mtr-miR2630e, mtr-miR2630f, mtr-miR2630g, mtr-miR2630h, mtr-miR2630i, mtr-miR2630j, mtr-miR2630k, mtr-miR2630l, mtr-miR2630m, mtr-miR2630n, mtr-miR2630o, mtr-miR2630p, mtr-miR2630q, mtr-miR2630r, mtr-miR2630s, mtr-miR2630t, mtr-miR2630u, mtr-miR2…
Os02g0642300 LOC_Os02g42890 OJ1112_G03.14 OsJ_07691	35	ptc-miR472b, ptc-miR1448, gma-miR482a-3p, pvu-miR2118, pvu-miR482-3p, mtr-miR2118, aqc-miR482a, aqc-miR482b, aqc-miR482c, ghr-miR482b, gso-miR482a, gso-miR482b, gso-miR2218, vvi-miR3633a-3p, gma-miR482b-3p, csi-miR482b, gma-miR2118a-3p, gma-miR2118b-3p, gma-miR482c-3p, sly-miR482a, gma-miR482d-3p, vun-miR482, vun-miR2118, stu-miR482a-3p, nta-miR482a, stu-miR482d-3p, stu-miR482e-3p, sly-miR482b, s…
GSVIVT00013502001	35	ath-miR172b-5p, osa-miR156c-3p, osa-miR156g-3p, ath-miR172e-5p, osa-miR172d-5p, zma-miR156a-3p, ptc-miR397c, ath-miR447c-3p, smo-miR1082a, osa-miR1870-5p, mtr-miR1509a-3p, bra-miR172b-5p, mtr-miR2590a, mtr-miR2590b, mtr-miR2590c, mtr-miR2590d, mtr-miR2590e, mtr-miR2590f, zma-miR169q-3p, osa-miR2926, aly-miR172b-5p, aly-miR172e-5p, ath-miR841b-3p, esi-miR3467-5p, osa-miR812o-3p, gma-miR172g, osa-m…
MED22A MED22_2 At1g16430 F3O9.23	35	ath-miR156a-3p, ath-miR156b-3p, ath-miR156d-3p, ath-miR156f-3p, osa-miR156b-3p, osa-miR156c-3p, osa-miR156f-3p, osa-miR156g-3p, osa-miR156h-3p, osa-miR156j-3p, osa-miR156l-3p, zma-miR156d-3p, zma-miR156f-3p, zma-miR156g-3p, zma-miR156b-3p, zma-miR156a-3p, zma-miR156k-3p, mtr-miR156b-3p, mtr-miR156c-3p, mtr-miR156i-3p, aly-miR156a-3p, aly-miR156b-3p, aly-miR156f-3p, bdi-miR156e-3p, stu-miR156f-3p,…
GN EMB30 GBF3 MIZ2 VAN7 At1g13980 F16A14.20 F7A19.7	35	osa-miR530-5p, ath-miR838, ptc-miR530a, ptc-miR530b, aqc-miR530, esi-miR3450-3p, esi-miR3453-5p, gma-miR394a-3p, csi-miR530a, tcc-miR530a, tcc-miR530b, gma-miR530a, osa-miR5337a, gma-miR5667-3p, gma-miR530b, mtr-miR530, gma-miR530c, gma-miR530d, gma-miR530e, htu-miR530, cme-miR530a, sbi-miR6235-3p, mes-miR530a, mes-miR530b, stu-miR530, gra-miR7492g, gra-miR7492h, gra-miR7492i, gra-miR7492j, gra-m…
GN EMB30 GBF3 MIZ2 VAN7 At1g13980 F16A14.20 F7A19.7	35	ath-miR403-3p, ptc-miR403a, ptc-miR403b, ptc-miR403c-3p, vvi-miR403a, vvi-miR403b, vvi-miR403c, vvi-miR403d, vvi-miR403e, vvi-miR403f, sbi-miR821b, rco-miR403a, rco-miR403b, aly-miR403a-3p, aly-miR773b-3p, bra-miR2111b-3p, csi-miR403, tcc-miR403a, tcc-miR403b, bna-miR403, htu-miR403a, htu-miR403b, htu-miR403c, htu-miR403d, htu-miR403e, har-miR403a, hpe-miR403a, mdm-miR403a, mdm-miR403b, mes-miR40…
UPL5 At4g12570 T1P17.160	35	ath-miR390a-3p, ath-miR390b-3p, osa-miR390-3p, ptc-miR390d-3p, ppt-miR533d, ppt-miR533e, ppt-miR1073-5p, smo-miR1096, gma-miR390a-3p, mtr-miR2086-3p, mtr-miR2615a, mtr-miR2615b, mtr-miR2615c, mtr-miR2657, aly-miR390a-3p, gma-miR4379, ath-miR3933, gma-miR390c, ath-miR5012, hme-miR-2788-3p, mtr-miR5260, sbi-miR5389, aau-miR2086, amg-miR2086, mtr-miR5555-3p, sbi-miR5387b, gma-miR5673, hvu-miR6192, m…
CPR	34	ath-miR168a-5p, ath-miR168b-5p, gma-miR168a, ptc-miR168a-5p, ptc-miR168b-5p, bna-miR168a, vvi-miR168, ccl-miR168, crt-miR168, rco-miR168, aly-miR168a-5p, aly-miR168b-5p, gso-miR1508a, tcc-miR168, gma-miR168b, gma-miR1508c, cme-miR168, mtr-miR168b, mtr-miR168c-5p, vun-miR168, mes-miR168a, cca-miR168a, nta-miR168a, nta-miR168b, nta-miR168c, nta-miR168d, nta-miR168e, mdm-miR168a, mdm-miR168b, sly-mi…
At1g08610 F22O13.9	34	ath-miR846-3p, ptc-miR171l-3p, ptc-miR171l-3p, ptc-miR171m, ptc-miR171m, ptc-miR171j, ptc-miR171j, gma-miR171b-3p, gma-miR171b-3p, vvi-miR171g, aly-miR846-3p, aly-miR3449-5p, aly-miR4241, gma-miR4374a, gma-miR4414-3p, csi-miR171b, csi-miR171b, osa-miR5144-5p, mtr-miR171h, mtr-miR171h, mtr-miR5278, mtr-miR171g, mtr-miR171g, gma-miR171r, gma-miR171r, gma-miR171s, gma-miR171s, lja-miR171c, lja-miR17…
At1g08610 F22O13.9	34	ath-miR172b-5p, ath-miR172e-5p, osa-miR172d-5p, ath-miR426, zma-miR172d-5p, zma-miR172b-5p, zma-miR172c-5p, gma-miR172b-5p, ptc-miR172b-5p, ptc-miR172g-5p, ptc-miR172h-5p, bra-miR172b-5p, aly-miR172a-5p, aly-miR172b-5p, aly-miR172c-5p, aly-miR172e-5p, bdi-miR172a-5p, mtr-miR172c-5p, gma-miR172g, gma-miR172h-5p, gma-miR172i-5p, gma-miR172j, mtr-miR7696a-3p, mtr-miR7696b-3p, bdi-miR7734-5p, stu-miR…
SPX3 At2g45130 T14P1.6	34	ath-miR165a-5p, osa-miR166a-5p, osa-miR166b-5p, osa-miR166c-5p, osa-miR166d-5p, osa-miR166e-5p, zma-miR166a-5p, zma-miR166b-5p, zma-miR166c-5p, zma-miR166d-5p, gma-miR166a-5p, mtr-miR166g-5p, cre-miR1144b, bna-miR161, csi-miR166e-5p, aly-miR165a-5p, aly-miR165b-5p, aly-miR166a-5p, aly-miR166c-5p, aly-miR166d-5p, esi-miR3451-3p, gma-miR166c-5p, bdi-miR166b-5p, bdi-miR166e-5p, bdi-miR166c-5p, gma-m…
	34	osa-miR398b, ptc-miR398b, ptc-miR398c-3p, mtr-miR398b, mtr-miR398c, vvi-miR398b, vvi-miR398c, osa-miR1846a-5p, osa-miR1846b-5p, osa-miR1870-3p, osa-miR1874-3p, osa-miR1846c-5p, aqc-miR398b, zma-miR398a-3p, zma-miR398b-3p, sbi-miR398, rco-miR398b, tae-miR398, tcc-miR398a, gma-miR398c, bdi-miR398a, cca-miR398, cca-miR6113, nta-miR398, ptc-miR6465, mdm-miR398b, mdm-miR398c, cme-miR398a, stu-miR8002-…
	34	osa-miR169n, osa-miR169o, sbi-miR169i, ptc-miR172h-5p, mtr-miR169h, ppt-miR1073-3p, bna-miR169m, zma-miR169o-5p, aly-miR169n-5p, esi-miR3460-5p, tcc-miR169f, bdi-miR169d, gma-miR169k, gma-miR169l-5p, cme-miR169q, cme-miR169s, cme-miR169p, cme-miR169d, cme-miR169c, cme-miR169m, cme-miR169j, cme-miR169b, cme-miR169a, cme-miR169i, cme-miR169l, ghr-miR7496a, ghr-miR7496b, ghr-miR7504b, mes-miR169l, m…
RHA1A At4g11370 F8L21.160	34	ath-miR156a-3p, ath-miR156b-3p, ath-miR156d-3p, ath-miR156f-3p, osa-miR156b-3p, osa-miR156c-3p, osa-miR156f-3p, osa-miR156g-3p, osa-miR156h-3p, osa-miR156j-3p, osa-miR156l-3p, zma-miR156d-3p, zma-miR156f-3p, zma-miR156g-3p, zma-miR156b-3p, zma-miR156a-3p, zma-miR156k-3p, mtr-miR156b-3p, mtr-miR156c-3p, mtr-miR156i-3p, aly-miR156a-3p, aly-miR156b-3p, aly-miR156f-3p, bdi-miR156e-3p, stu-miR156f-3p,…
RHA1A At4g11370 F8L21.160	34	osa-miR399a, osa-miR399b, osa-miR399c, sbi-miR399a, sbi-miR399c, zma-miR399a-3p, zma-miR399c-3p, sbi-miR399h, ptc-miR399f, ptc-miR399g, smo-miR1081, tae-miR399, vvi-miR399a, vvi-miR399h, sbi-miR399j, bdi-miR399a, mtr-miR2627, zma-miR399h-3p, ghr-miR399c, csi-miR399e, csi-miR399c, tcc-miR399g, bdi-miR399b, ssl-miR399, vun-miR399b, mes-miR399a, mdm-miR399a, mdm-miR399b, mdm-miR399c, bdi-miR7764-5p,…
NHL10 YLS9 At2g35980 F11F19.11	33	osa-miR169n, osa-miR169o, sbi-miR169c, sbi-miR169i, ptc-miR475a-3p, ptc-miR475b-3p, ppt-miR2077, osa-miR2118c, osa-miR2118q, zma-miR2118g, zma-miR169o-5p, aly-miR161-3p.2, aly-miR4237, tcc-miR399f, hvu-miR444b, bdi-miR169d, mtr-miR5290, gma-miR4416b, lja-miR7519, lja-miR7526a, lja-miR7526b, lja-miR7526c, lja-miR7526d, lja-miR7526e, lja-miR7526f, lja-miR7526g, lja-miR7526h, bdi-miR7751-5p, bdi-miR…
HISN7 IMPL2 At4g39120 T22F8.20	33	ppt-miR1078, mtr-miR2630a, mtr-miR2630b, mtr-miR2630c, mtr-miR2630w, mtr-miR2630x, mtr-miR2630y, mtr-miR2630d, mtr-miR2630e, mtr-miR2630f, mtr-miR2630g, mtr-miR2630h, mtr-miR2630i, mtr-miR2630j, mtr-miR2630k, mtr-miR2630l, mtr-miR2630m, mtr-miR2630n, mtr-miR2630o, mtr-miR2630p, mtr-miR2630q, mtr-miR2630r, mtr-miR2630s, mtr-miR2630t, mtr-miR2630u, mtr-miR2630v, osa-miR5152-3p, sbi-miR5570, gma-miR…
LCV2 At1g43130 F2H10.2	33	ppt-miR1078, mtr-miR2630a, mtr-miR2630b, mtr-miR2630c, mtr-miR2630w, mtr-miR2630x, mtr-miR2630y, mtr-miR2630d, mtr-miR2630e, mtr-miR2630f, mtr-miR2630g, mtr-miR2630h, mtr-miR2630i, mtr-miR2630j, mtr-miR2630k, mtr-miR2630l, mtr-miR2630m, mtr-miR2630n, mtr-miR2630o, mtr-miR2630p, mtr-miR2630q, mtr-miR2630r, mtr-miR2630s, mtr-miR2630t, mtr-miR2630u, mtr-miR2630v, osa-miR5152-3p, sbi-miR5570, ptc-miR…
LCV2 At1g43130 F2H10.2	33	ath-miR472-3p, mtr-miR156b-3p, mtr-miR156c-3p, ppt-miR1046-5p, gma-miR1523a, aly-miR156f-3p, aly-miR472-3p, aly-miR4243, ath-miR4243, tcc-miR169n, mtr-miR5261, mtr-miR5749, hbr-miR6166, hvu-miR6195, ptc-miR6441, ghr-miR7486a, ghr-miR7486b, bdi-miR7708a-5p, bdi-miR7725b-3p.1, rgl-miR7804-3p, stu-miR1886g-3p, stu-miR156g-3p, gra-miR8742a, gra-miR8742b, sly-miR9472-3p, sly-miR156e-3p, bdi-miR5200a-3…
GONST1 At2g13650 T10F5.19	33	ath-miR158a-5p, mtr-miR319a-5p, zma-miR319a-5p, zma-miR319c-5p, ppt-miR319d-5p.1, ppt-miR535a, ppt-miR535b, ppt-miR535c, osa-miR535-5p, ppt-miR535d, vvi-miR535a, vvi-miR535b, vvi-miR535c, mtr-miR2604, rco-miR535, aly-miR158a-5p, pab-miR3695, pab-miR535, bdi-miR156b-3p, bdi-miR319b-5p, mtr-miR5233, sbi-miR5567, ath-miR5651, hvu-miR6192, mdm-miR535a, mes-miR535a, mes-miR535b, lja-miR408, mtr-miR319…
VAMP714 At5g22360 MWD9.16	33	zma-miR166i-5p, osa-miR818a, osa-miR818b, osa-miR818c, osa-miR818d, osa-miR818e, ath-miR869.1, gma-miR1512a-5p, mtr-miR2655a, mtr-miR2655c, mtr-miR2655d, mtr-miR2655e, mtr-miR2655f, mtr-miR2655g, mtr-miR2655h, mtr-miR2655i, mtr-miR2655j, mtr-miR2655k, mtr-miR2655l, mtr-miR2655m, mtr-miR2655n, mtr-miR2655o, osa-miR2867-3p, zma-miR482-3p, tae-miR167b, gma-miR4992, gma-miR1512b, gma-miR5777, bdi-miR…
At5g16450 MQK4.18	32	ath-miR855, ppt-miR1026a, ppt-miR1026b, cre-miR1144b, osa-miR1425-3p, mtr-miR2592b-5p, mtr-miR2592d-5p, mtr-miR2592e-5p, mtr-miR2592o-5p, mtr-miR2592q-5p, mtr-miR2592s-5p, osa-miR5151, mtr-miR2592t, mtr-miR2592u, mtr-miR2592v, mtr-miR2592w, mtr-miR2592x, mtr-miR2592y, mtr-miR2592z, mtr-miR2592ab, mtr-miR2592ac, mtr-miR2592ad, mtr-miR2592ae, mtr-miR2592af, mtr-miR2592ah, mtr-miR2592ai, mtr-miR2592…
GFT1 GONST4 At5g19980 F28I16.130	32	zma-miR166l-5p, ath-miR472-3p, smo-miR1087, cre-miR1166.2, ptc-miR1448, vvi-miR482, osa-miR1859, ghr-miR482a, ghr-miR482b, aly-miR472-3p, gso-miR482a, gso-miR482b, pab-miR482c, gma-miR482b-3p, csi-miR482a-3p, tcc-miR535, sly-miR5300, sly-miR482e-3p, gma-miR482d-3p, mtr-miR5750, stu-miR482c, stu-miR482d-3p, sly-miR482b, pde-miR482a, pde-miR482d, mdm-miR482b, mdm-miR482c, osa-miR1437b-5p, bdi-miR77…
NTRB Os02g0713400 LOC_Os02g48290 OJ1479_B12.9 OsJ_08126	32	zma-miR166h-3p, zma-miR166e, zma-miR166i-3p, zma-miR166f, zma-miR166g-3p, zma-miR166b-3p, zma-miR166c-3p, zma-miR166d-3p, sbi-miR166d, sbi-miR166c, sbi-miR166b, sbi-miR166a, ptc-miR166p, vvi-miR166a, vvi-miR166b, sbi-miR166h, sbi-miR166i, sbi-miR166j, csi-miR166c, tcc-miR166b, gma-miR166p, gma-miR166q, gma-miR166r, gma-miR166s, gma-miR166t, hbr-miR166a, pde-miR166a, pde-miR166b, cme-miR166i, cme-…
FRL2	32	ath-miR398b-5p, ath-miR398c-5p, ath-miR780.1, ath-miR864-5p, ppt-miR902b-5p, cre-miR908.3, ppt-miR902c-5p, ppt-miR902d-5p, ppt-miR902e-5p, ppt-miR902f-5p, ppt-miR902g-5p, ppt-miR902j-5p, ppt-miR1023a-3p, ppt-miR1023b-3p, aly-miR860-3p, aly-miR402-3p, aly-miR837-5p, ath-miR773b-5p, vvi-miR3624-3p, osa-miR3981-3p, ath-miR5017-3p, mtr-miR5240, mtr-miR2643b-5p, mtr-miR2590g, mtr-miR5745b, osa-miR5789…
ERDJ3B DJB6 Os05g0156500 LOC_Os05g06440 OsJ_17183 P0431G05.15 P0676G05.5	32	osa-miR395t, mtr-miR395a, zma-miR171k-5p, zma-miR171h-5p, sbi-miR395f, mtr-miR395c, mtr-miR395d, mtr-miR395e, mtr-miR395f, mtr-miR395h, mtr-miR395i, mtr-miR395j, mtr-miR395l, mtr-miR395m, mtr-miR395n, mtr-miR395o, osa-miR395o, zma-miR395k-3p, esi-miR3463-3p, pab-miR395, gma-miR5037d, gma-miR395d, gma-miR395e, gma-miR395f, gma-miR395g, gma-miR395i, gma-miR395j, gma-miR395k, gma-miR395l, gma-miR395…
SSL3 SS9 At1g08470 T27G7.16	32	osa-miR408-5p, sbi-miR164c, ath-miR780.2, ath-miR842, gma-miR1508a, osa-miR1853-5p, gma-miR2107, mtr-miR2625, zma-miR164e-5p, zma-miR399g-3p, sbi-miR399k, aly-miR842-3p, gma-miR4410, gma-miR5040, mtr-miR5745b, ptc-miR6425a-3p, ptc-miR6425b-3p, ptc-miR6425c-3p, ptc-miR6473, ptc-miR6425d-3p, ptc-miR6431, sbi-miR6234a-5p, sbi-miR6234b-5p, lja-miR7533a, lja-miR7533b, mtr-miR172d-5p, bdi-miR7744-5p, b…
SSL3 SS9 At1g08470 T27G7.16	32	osa-miR408-5p, sbi-miR164c, ath-miR780.2, ath-miR842, gma-miR1508a, osa-miR1853-5p, gma-miR2107, mtr-miR2625, zma-miR164e-5p, zma-miR399g-3p, sbi-miR399k, aly-miR842-3p, gma-miR4410, gma-miR5040, mtr-miR5745b, ptc-miR6425a-3p, ptc-miR6425b-3p, ptc-miR6425c-3p, ptc-miR6473, ptc-miR6425d-3p, ptc-miR6431, sbi-miR6234a-5p, sbi-miR6234b-5p, lja-miR7533a, lja-miR7533b, mtr-miR172d-5p, bdi-miR7744-5p, b…
At5g51830 MIO24.3	32	zma-miR166i-5p, zma-miR172a, zma-miR172d-3p, zma-miR172b-3p, zma-miR172c-3p, sbi-miR172c, sbi-miR172a, cre-miR1160.1, sbi-miR172d, csi-miR172a-3p, vvi-miR3629a-3p, vvi-miR3629b, vvi-miR3629c, gma-miR4366, gma-miR172f, mtr-miR5219, mtr-miR5560-3p, hme-miR-71, mdm-miR172a, mdm-miR172b, mdm-miR172c, lja-miR172b, lja-miR172c, mtr-miR172d-3p, stu-miR8023, stu-miR172c-3p, cpa-miR172a, cpa-miR172b, bra-…
At5g67130 K21H1.9	32	cre-miR1167, ppt-miR2085, mtr-miR2630a, mtr-miR2630b, mtr-miR2630c, mtr-miR2630w, mtr-miR2630x, mtr-miR2630y, mtr-miR2630d, mtr-miR2630e, mtr-miR2630f, mtr-miR2630g, mtr-miR2630h, mtr-miR2630i, mtr-miR2630j, mtr-miR2630k, mtr-miR2630l, mtr-miR2630m, mtr-miR2630n, mtr-miR2630o, mtr-miR2630p, mtr-miR2630q, mtr-miR2630r, mtr-miR2630s, mtr-miR2630t, mtr-miR2630u, mtr-miR2630v, ptc-miR6432, bdi-miR774…
SBT3.10 At4g10530 F3H7.13 F7L13.110	32	cre-miR1167, ppt-miR2085, mtr-miR2630a, mtr-miR2630b, mtr-miR2630c, mtr-miR2630w, mtr-miR2630x, mtr-miR2630y, mtr-miR2630d, mtr-miR2630e, mtr-miR2630f, mtr-miR2630g, mtr-miR2630h, mtr-miR2630i, mtr-miR2630j, mtr-miR2630k, mtr-miR2630l, mtr-miR2630m, mtr-miR2630n, mtr-miR2630o, mtr-miR2630p, mtr-miR2630q, mtr-miR2630r, mtr-miR2630s, mtr-miR2630t, mtr-miR2630u, mtr-miR2630v, ptc-miR6432, bdi-miR774…
SBT3.10 At4g10530 F3H7.13 F7L13.110	32	ath-miR407, osa-miR166k-3p, osa-miR166l-3p, ath-miR418, osa-miR418, sbi-miR166e, zma-miR166k-3p, zma-miR166j-3p, sbi-miR166g, ptc-miR166n, ptc-miR166o, ptc-miR166q, osa-miR1428b, osa-miR1428c, osa-miR1428d, osa-miR1428e-3p, osa-miR2055, zma-miR166n-3p, ath-miR2937, aly-miR3438-3p, pab-miR166b, bdi-miR166e-3p, pti-miR5472, gma-miR166u, cme-miR166i, bdi-miR166h-3p, rgl-miR7798, stu-miR5303e, gra-mi…
RPS3C At5g35530 MOK9.14	32	zma-miR166i-5p, osa-miR818a, osa-miR818b, osa-miR818c, osa-miR818d, osa-miR818e, ath-miR869.1, gma-miR1512a-5p, mtr-miR2655a, mtr-miR2655c, mtr-miR2655d, mtr-miR2655e, mtr-miR2655f, mtr-miR2655g, mtr-miR2655h, mtr-miR2655i, mtr-miR2655j, mtr-miR2655k, mtr-miR2655l, mtr-miR2655m, mtr-miR2655n, mtr-miR2655o, osa-miR2867-3p, zma-miR482-3p, tae-miR167b, gma-miR4992, gma-miR1512b, gma-miR5777, bdi-miR…
ADK PHYPADRAFT_184505	31	zma-miR166l-5p, ath-miR472-3p, smo-miR1087, cre-miR1166.2, ptc-miR1448, vvi-miR482, osa-miR1859, ghr-miR482a, ghr-miR482b, aly-miR472-3p, aly-miR3440-3p, gso-miR482a, gso-miR482b, pab-miR482c, gma-miR482b-3p, csi-miR482a-3p, sly-miR5300, sly-miR482e-3p, gma-miR5369, gma-miR482d-3p, stu-miR482c, stu-miR482d-3p, sly-miR482b, pde-miR482a, pde-miR482d, mdm-miR482b, mdm-miR482c, bdi-miR7751-5p, gra-mi…
ARF Os05g0489600 LOC_Os05g41060 OJ1119_H02.17	31	ath-miR840-3p, ath-miR860, ppt-miR1037, ppt-miR1052, gma-miR171b-5p, osa-miR2093-5p, mtr-miR2655a, mtr-miR2655b, mtr-miR2655c, mtr-miR2655d, mtr-miR2655e, mtr-miR2655f, mtr-miR2655g, mtr-miR2655h, mtr-miR2655i, mtr-miR2655j, mtr-miR2655k, mtr-miR2655l, mtr-miR2655m, mtr-miR2655n, mtr-miR2655o, aly-miR156g-3p, aly-miR840-3p, gma-miR4380b, osa-miR5491, mtr-miR5745b, bna-miR860, bdi-miR7741-5p.1, rg…
ARF Os05g0489600 LOC_Os05g41060 OJ1119_H02.17	31	osa-miR399a, osa-miR399b, osa-miR399c, sbi-miR399a, sbi-miR399c, zma-miR399a-3p, zma-miR399c-3p, sbi-miR399h, ptc-miR399f, ptc-miR399g, cre-miR1168.1, vvi-miR399a, vvi-miR399h, gma-miR1513a-3p, ath-miR1888a, sbi-miR399j, zma-miR399h-3p, csi-miR399e, csi-miR399c, tcc-miR399g, bdi-miR399b, vun-miR399b, mes-miR399a, mdm-miR399a, mdm-miR399b, mdm-miR399c, ghr-miR7485, bdi-miR399c, gma-miR399i, ata-mi…
Os01g0813400 LOC_Os01g59790 OsJ_03844 OSJNBa0085D07.10 P0425G02.41 P0432B10.14	31	ptc-miR397c, ppt-miR1025, mtr-miR2630a, mtr-miR2630b, mtr-miR2630c, mtr-miR2630w, mtr-miR2630x, mtr-miR2630y, mtr-miR2630d, mtr-miR2630e, mtr-miR2630g, mtr-miR2630h, mtr-miR2630i, mtr-miR2630j, mtr-miR2630k, mtr-miR2630l, mtr-miR2630m, mtr-miR2630n, mtr-miR2630o, mtr-miR2630p, mtr-miR2630q, mtr-miR2630r, mtr-miR2630t, mtr-miR2630u, mtr-miR2630v, aly-miR4223, cca-miR6103-5p, ptc-miR6443, bdi-miR77…
ARF Os05g0489600 LOC_Os05g41060 OJ1119_H02.17	31	osa-miR171g, osa-miR171h, sbi-miR171c, sbi-miR171e, zma-miR171g-3p, zma-miR171k-3p, zma-miR171h-3p, sbi-miR171f, ppt-miR477h, cre-miR1147.1, vvi-miR477a, mtr-miR2199, mtr-miR2199, aqc-miR171e, aly-miR158b-3p, gma-miR4408, mtr-miR5261, mtr-miR5037a, mtr-miR5037b, mtr-miR5037c, ptc-miR6439b, mdm-miR171i, mes-miR477f, mes-miR477g, bdi-miR7732-5p, ptc-miR7826, stu-miR8051-3p, stu-miR479, gra-miR8758,…
ARF1 ARF1A1C BEX1 At2g47170 T3D7.2 T8I13.1	31	ath-miR408-3p, osa-miR167e-3p, osa-miR167i-3p, ptc-miR408-3p, pta-miR408, pta-miR947, ppt-miR902h-3p, vvi-miR408, aly-miR161-3p.2, aly-miR408-3p, ahy-miR408-3p, aly-miR3444b, pab-miR947, csi-miR408, ssp-miR1128, mtr-miR5269a, gma-miR408a-3p, gma-miR408b-3p, gma-miR408c-3p, mtr-miR408-3p, vun-miR408, osa-miR812r, mes-miR408, nta-miR6145b, pde-miR947, mdm-miR408a, cme-miR408, bdi-miR5174e-5p.2, bdi…
Os01g0813400 LOC_Os01g59790 OsJ_03844 OSJNBa0085D07.10 P0425G02.41 P0432B10.14	31	ath-miR403-3p, ptc-miR403a, ptc-miR403b, ptc-miR403c-3p, vvi-miR403a, vvi-miR403b, vvi-miR403c, vvi-miR403d, vvi-miR403e, vvi-miR403f, rco-miR403a, rco-miR403b, aly-miR403a-3p, csi-miR403, tcc-miR403a, tcc-miR403b, bna-miR403, htu-miR403a, htu-miR403b, htu-miR403c, htu-miR403d, htu-miR403e, har-miR403a, hpe-miR403a, mdm-miR403a, mdm-miR403b, mes-miR403a, mes-miR403b, ptc-miR403d, aly-miR403b-3p, …
ARF1	31	osa-miR160c-3p, ppt-miR900-5p, ppt-miR1027a, ppt-miR1027b, smo-miR1091, gma-miR1514a-5p, gma-miR1514b-5p, osa-miR1850.3, mtr-miR2609a, mtr-miR2609b, aly-miR825-5p, bdi-miR160d-3p, osa-miR5511, mtr-miR5757, osa-miR5796, ath-miR5595a, ath-miR5995b, hbr-miR6166, hme-miR-6301-2-5p, ptc-miR6422, mdm-miR7127a, mdm-miR7127b, bdi-miR7750-5p, bdi-miR7723b-3p, bdi-miR7777-5p.2, ptc-miR7841, esi-miR8624b, g…
Os01g0813400 LOC_Os01g59790 OsJ_03844 OSJNBa0085D07.10 P0425G02.41 P0432B10.14	31	osa-miR160c-3p, ppt-miR900-5p, ppt-miR1027a, ppt-miR1027b, smo-miR1091, gma-miR1514a-5p, gma-miR1514b-5p, osa-miR1850.3, mtr-miR2609a, mtr-miR2609b, aly-miR825-5p, bdi-miR160d-3p, osa-miR5511, mtr-miR5757, osa-miR5796, ath-miR5595a, ath-miR5995b, hbr-miR6166, hme-miR-6301-2-5p, ptc-miR6422, mdm-miR7127a, mdm-miR7127b, bdi-miR7750-5p, bdi-miR7723b-3p, bdi-miR7777-5p.2, ptc-miR7841, esi-miR8624b, g…
Os01g0813400 LOC_Os01g59790 OsJ_03844 OSJNBa0085D07.10 P0425G02.41 P0432B10.14	31	ath-miR419, ppt-miR1222a, pta-miR948, osa-miR169r-3p, mtr-miR2653a, mtr-miR2653b, mtr-miR2653c, aly-miR397b-3p, ghr-miR3476-5p, csi-miR3949, osa-miR2873b, ath-miR5012, bdi-miR5058, osa-miR5541, bra-miR5721, cca-miR6109, nta-miR479a, hvu-miR6201, hme-miR-279b, hme-miR-6303-5p, mdm-miR7121a, mdm-miR7121b, mdm-miR7121c, mtr-miR2653d, bdi-miR7723a-3p, bdi-miR7741-5p.1, ptc-miR7813, tae-miR9655-3p, ta…
Os01g0813400 LOC_Os01g59790 OsJ_03844 OSJNBa0085D07.10 P0425G02.41 P0432B10.14	30	ath-miR169g-3p, osa-miR393a, sbi-miR393a, mtr-miR393a, ptc-miR393a-5p, ptc-miR393b-5p, ptc-miR393c, mtr-miR393b-5p, bna-miR393, vvi-miR393b, gma-miR393a, vvi-miR393a, osa-miR2099-5p, sbi-miR393b, rco-miR393, tcc-miR393b, bdi-miR393a, bdi-miR393b-5p, gma-miR393h, gma-miR393i, gma-miR393j, gma-miR393k, cme-miR393a, cme-miR393b, cme-miR393c, gra-miR7504d, gra-miR7504e, gra-miR7504f, gra-miR7504g, gr…
Os01g0813400 LOC_Os01g59790 OsJ_03844 OSJNBa0085D07.10 P0425G02.41 P0432B10.14	30	ath-miR171a-3p, osa-miR171a, ptc-miR171c, ptc-miR171d, ptc-miR171k, mtr-miR171e-3p, bna-miR171g, cre-miR1146, bna-miR171f, vvi-miR171e, bra-miR171e, sbi-miR171g, sbi-miR171j, bdi-miR171a, zma-miR171n-3p, ccl-miR171, rco-miR171g, aly-miR171a-3p, esi-miR3461-5p, tcc-miR171a, tcc-miR171b, tcc-miR171c, mdm-miR171c, mdm-miR171d, mdm-miR171e, cme-miR171e, cme-miR171a, cme-miR171g, mes-miR171e, mes-miR1…
Os02g0677700 LOC_Os02g45480	30	ath-miR400, zma-miR399a-5p, zma-miR399b-5p, ptc-miR169n-3p, ptc-miR478a, ptc-miR478b, ptc-miR478c, ptc-miR478f, smo-miR1085-5p, osa-miR1846a-5p, osa-miR1846b-5p, osa-miR1877, osa-miR1846c-5p, mtr-miR2679a, mtr-miR2679b, mtr-miR2679c, zma-miR399h-5p, aly-miR400-5p, aly-miR3446-3p, ath-miR773b-3p, vvi-miR3630-5p, csi-miR3952, sbi-miR5564b, osa-miR5816, nta-miR6145c, hme-miR-184, ptc-miR156l, ath-mi…
UBA2A At3g56860 T8M16.190	30	ath-miR172b-5p, ath-miR172e-5p, osa-miR172d-5p, gma-miR172b-5p, ppt-miR1027a, ppt-miR1027b, ppt-miR1028c-3p, cre-miR1152, bra-miR172b-5p, aly-miR172b-5p, aly-miR172e-5p, aly-miR774a-3p.2, aly-miR4232, gma-miR5371-3p, gma-miR172g, gma-miR172h-5p, gma-miR172i-5p, gma-miR172j, osa-miR2275d, mdm-miR393d, mdm-miR393e, mdm-miR393f, ghr-miR7484a, ghr-miR7484b, stu-miR4376-3p, stu-miR172b-5p, stu-miR393-…
At5g25630 T14C9_170	30	osa-miR2102-5p, mtr-miR2630a, mtr-miR2630b, mtr-miR2630c, mtr-miR2630w, mtr-miR2630x, mtr-miR2630y, mtr-miR2630d, mtr-miR2630e, mtr-miR2630f, mtr-miR2630g, mtr-miR2630h, mtr-miR2630i, mtr-miR2630j, mtr-miR2630k, mtr-miR2630l, mtr-miR2630m, mtr-miR2630n, mtr-miR2630o, mtr-miR2630p, mtr-miR2630q, mtr-miR2630r, mtr-miR2630s, mtr-miR2630t, mtr-miR2630u, mtr-miR2630v, far-miR437, sbi-miR5568g-3p, bdi-…
At5g25630 T14C9_170	30	ath-miR164b-3p, zma-miR164c-3p, osa-miR528-3p, ath-miR472-3p, ath-miR472-3p, ath-miR841a-3p, mtr-miR2638a, mtr-miR2638b, zma-miR164h-3p, aly-miR164b-3p, aly-miR472-3p, aly-miR472-3p, gso-miR482a, gso-miR482a, gso-miR482b, gso-miR482b, aly-miR4239, ath-miR4239, gma-miR482b-3p, gma-miR482b-3p, bdi-miR164a-3p, gma-miR482d-3p, gma-miR482d-3p, stu-miR482d-3p, stu-miR482d-3p, sly-miR482b, sly-miR482b, …
GATC Sb01g013180	30	osa-miR166i-5p, mtr-miR2592b-5p, mtr-miR2592d-5p, mtr-miR2592e-5p, mtr-miR2592o-5p, mtr-miR2592q-5p, mtr-miR2592s-5p, aly-miR3449-3p, mtr-miR2592t, mtr-miR2592u, mtr-miR2592v, mtr-miR2592w, mtr-miR2592x, mtr-miR2592y, mtr-miR2592z, mtr-miR2592ab, mtr-miR2592ac, mtr-miR2592ad, mtr-miR2592ae, mtr-miR2592af, mtr-miR2592ah, mtr-miR2592ai, mtr-miR2592aj, mtr-miR2592al, mtr-miR2592am, osa-miR5514, nta-…
GATC VIT_04s0008g00570	29	zma-miR395b-5p, ath-miR830-5p, zma-miR395e-5p, zma-miR395h-5p, zma-miR395i-5p, zma-miR395j-5p, zma-miR395k-5p, zma-miR395n-5p, zma-miR395o-5p, zma-miR395p-5p, aly-miR163-5p.1, csi-miR473, bdi-miR156d-3p, bdi-miR395c-5p, bdi-miR395f-5p, bdi-miR395g-5p, bdi-miR395h-5p, bdi-miR395j-5p, bdi-miR395k-5p, bdi-miR395l-5p, bdi-miR395n-5p, mes-miR477h, bdi-miR156f-3p, bdi-miR395o-5p, bdi-miR395p-5p, ata-mi…
PGSIP8 At2g35710 T20F21.27	29	ath-miR170-5p, ath-miR171a-5p, ath-miR171c-5p, osa-miR171c-5p, osa-miR171i-5p, zma-miR171b-5p, zma-miR171f-5p, ptc-miR171a-5p, pta-miR398, bdi-miR171c-5p, mtr-miR2607, zma-miR171l-5p, aly-miR170-5p, aly-miR171a-5p, aly-miR171c-5p, gma-miR171c-5p, gma-miR171j-5p, sbi-miR5568g-5p, bdi-miR5163b-5p, bdi-miR7743-5p, stu-miR171b-5p, stu-miR171a-5p, stu-miR171c-5p, stu-miR171d-5p, gra-miR8637, gra-miR87…
RABC1 RAB18 RAB18-1 At1g43890 F28H19.15 F9C16.3	29	ath-miR163, ptc-miR172b-5p, ptc-miR172g-5p, ptc-miR172h-5p, cre-miR905-5p, ppt-miR1067, mtr-miR2652a, mtr-miR2652b, mtr-miR2652c, mtr-miR2652d, mtr-miR2652e, mtr-miR2652f, mtr-miR2652g, mtr-miR2652h, mtr-miR2652i, mtr-miR2652j, mtr-miR2652k, mtr-miR2652l, osa-miR2931, aly-miR172c-5p, aly-miR163-3p.1, bdi-miR5178-5p, pti-miR5477, ath-miR5664, mtr-miR2652m, stu-miR6149-5p, stu-miR172d-5p, aly-miR17…
TIF3A1 At4g11420 F25E4.40	29	ath-miR165a-5p, osa-miR166a-5p, osa-miR166b-5p, osa-miR166c-5p, osa-miR166d-5p, osa-miR166e-5p, zma-miR166a-5p, zma-miR166b-5p, zma-miR166c-5p, zma-miR166d-5p, gma-miR166a-5p, mtr-miR166g-5p, csi-miR166e-5p, aly-miR165a-5p, aly-miR165b-5p, aly-miR166a-5p, aly-miR166c-5p, aly-miR166d-5p, osa-miR812n-5p, gma-miR166c-5p, bdi-miR166b-5p, bdi-miR166e-5p, bdi-miR166c-5p, gma-miR166l, stu-miR166a-5p, gr…
TIF3A1 At4g11420 F25E4.40	29	ath-miR839-5p, smo-miR1113, mtr-miR1509a-5p, mtr-miR2119, mtr-miR2674, zma-miR827-5p, osa-miR2921, aly-miR839-5p, ahy-miR3519, aly-miR4236, mtr-miR5238, gma-miR5380a, gma-miR5380b, mtr-miR5558-3p, ath-miR5637, ath-miR5645a, ath-miR5645b, ath-miR5645d, ath-miR5645f, ath-miR5645e, gma-miR5678, gma-miR5784, hme-miR-7, ghr-miR7500, stu-miR8027, ath-miR826b, gma-miR9745, ata-miR2118a-3p, ata-miR2118b-…
Os12g0104800 LOC_Os12g01390	29	ath-miR171b-5p, ath-miR171c-5p, osa-miR171c-5p, ppt-miR535a, ppt-miR535b, ppt-miR535c, osa-miR535-5p, ppt-miR535d, vvi-miR535a, vvi-miR535b, vvi-miR535c, aqc-miR535, rco-miR535, aly-miR171b-5p, aly-miR171c-5p, pab-miR535, gma-miR4385, gma-miR171c-5p, csi-miR535, tcc-miR535, ath-miR5637, mdm-miR535a, mdm-miR535b, mdm-miR535c, mdm-miR535d, mes-miR535a, mes-miR535b, stu-miR8007a-5p, cpa-miR535
Os11g0104900 LOC_Os11g01380	29	osa-miR164d, sbi-miR164b, ptc-miR164f, ath-miR771, ath-miR822-5p, mtr-miR164d, vvi-miR164b, aqu-miR-2014-3p, zma-miR164f-5p, rco-miR164d, aly-miR771-5p, gma-miR4410, tcc-miR164c, osa-miR5154, bdi-miR164c-5p, cme-miR164a, osa-miR5511, nta-miR164c, hme-bantam, cme-miR164b, sbi-miR6218-3p, mes-miR164d, bdi-miR7735-3p, bdi-miR7780-3p, ptc-miR7829, stu-miR164-5p, gra-miR167a, gra-miR167b, ata-miR164a-…
CYP21-4 At3g66654 T8E24.14	29	ath-miR415, osa-miR415, mtr-miR319a-3p, gma-miR319a, gma-miR319b, ptc-miR319a, ptc-miR319b, ptc-miR319c, ptc-miR319d, ppt-miR319a, ppt-miR319b, ppt-miR319c, ppt-miR319d-3p, mtr-miR319b-3p, ppt-miR319e, ppt-miR897, pta-miR159a, pta-miR319, vvi-miR319g, sly-miR319a, ctr-miR319, gma-miR319e, mtr-miR5253, pti-miR5481, cme-miR319b, cme-miR319a, lja-miR7521, mtr-miR319c-3p, gma-miR319p
CYP21-4 At3g66654 T8E24.14	29	ath-miR396a-3p, osa-miR396a-3p, osa-miR396b-3p, gma-miR396a-3p, zma-miR396b-3p, zma-miR396a-3p, mtr-miR396b-3p, ppt-miR1053-3p, smo-miR1103-3p, aly-miR396a-3p, lja-miR2111-3p, ath-miR4243, bdi-miR396d-3p, bdi-miR396c-3p, gma-miR396i-3p, ath-miR5645a, ath-miR5645b, ath-miR5645d, ath-miR5645f, ath-miR5645e, gma-miR5778, bdi-miR7736-5p, bdi-miR7755-3p, stu-miR8048-5p, stu-miR398b-5p, sly-miR396a-3p,…
UGE-1 Os05g0595100 LOC_Os05g51670 OsJ_19776 OSJNBa0030I14.9	29	osa-miR437, sbi-miR437a, sbi-miR437b, sbi-miR437c, sbi-miR437d, sbi-miR437e, sbi-miR437f, sbi-miR437g, sbi-miR437i, sbi-miR437j, sbi-miR437k, sbi-miR437l, sbi-miR437m, sbi-miR437n, sbi-miR437o, sbi-miR437p, sbi-miR437q, sbi-miR437r, sbi-miR437s, sbi-miR437t, sbi-miR437u, sbi-miR437v, sbi-miR437w, bdi-miR5058, ssp-miR437a, stu-miR7997c, gra-miR8682, tae-miR9652-5p, bra-miR400-3p
At4g17486 dl4780c FCAALL.234	29	zma-miR166i-5p, osa-miR818a, osa-miR818b, osa-miR818c, osa-miR818d, osa-miR818e, ath-miR869.1, gma-miR1512a-5p, mtr-miR2655a, mtr-miR2655c, mtr-miR2655d, mtr-miR2655e, mtr-miR2655f, mtr-miR2655g, mtr-miR2655h, mtr-miR2655i, mtr-miR2655j, mtr-miR2655k, mtr-miR2655l, mtr-miR2655m, mtr-miR2655n, mtr-miR2655o, vvi-miR477b-5p, gma-miR4992, gma-miR1512b, gma-miR5777, osa-miR6247, gra-miR8771f, bdi-miR2…
RAC2 Os05g0513800 LOC_Os05g43820 B1155G07.15 OsJ_19185 P0022D06.2	29	ath-miR396b-3p, osa-miR396c-3p, ath-miR849, cre-miR1152, mtr-miR1507-5p, osa-miR2868, osa-miR2871a-3p, osa-miR2871b, zma-miR396f-3p, osa-miR2923, aly-miR396b-3p, aly-miR4234, gma-miR4380a, ath-miR5029, gma-miR5031, bdi-miR396e-3p, mtr-miR5278, osa-miR5340, ath-miR5640, bra-miR5716, ptc-miR6460, sbi-miR6222-3p, lja-miR7544, gra-miR8636, gra-miR8660, bra-miR396-3p, gma-miR9726, tae-miR9775, ata-miR…
	28	cre-miR908.2, mtr-miR2592b-5p, mtr-miR2592d-5p, mtr-miR2592e-5p, mtr-miR2592o-5p, mtr-miR2592q-5p, mtr-miR2592s-5p, vvi-miR3637-3p, mtr-miR2592t, mtr-miR2592u, mtr-miR2592v, mtr-miR2592w, mtr-miR2592x, mtr-miR2592y, mtr-miR2592z, mtr-miR2592ab, mtr-miR2592ac, mtr-miR2592ad, mtr-miR2592ae, mtr-miR2592af, mtr-miR2592ah, mtr-miR2592ai, mtr-miR2592aj, mtr-miR2592al, mtr-miR2592am, gma-miR5772, mtr-mi…
BLUS1 At4g14480 dl3280c	28	ath-miR170-5p, ath-miR171a-5p, osa-miR171d-5p, osa-miR171e-5p, mtr-miR319a-5p, zma-miR171d-5p, zma-miR159a-5p, zma-miR171e-5p, ptc-miR397b, ppt-miR1023e-3p, zma-miR159f-5p, zma-miR397a-5p, zma-miR397b-5p, aly-miR170-5p, aly-miR171a-5p, bdi-miR319b-5p, sly-miR482e-5p, gma-miR171j-5p, osa-miR5484, dpr-miR397, hme-miR-282, mtr-miR319d-5p, bdi-miR159b-5p.1, stu-miR171a-5p, stu-miR171c-5p, sly-miR319c…
TPR3 ASPR1 TPR1 Os03g0254700 LOC_Os03g14980 OsJ_08437	28	ptc-miR472a, ptc-miR472b, ath-miR472-3p, osa-miR820a, osa-miR820b, osa-miR820c, osa-miR2118b, osa-miR2118d, osa-miR2118e, osa-miR2118n, osa-miR2118p, osa-miR2118r, zma-miR2118b, zma-miR2118d, aly-miR472-3p, gso-miR482a, gso-miR482b, gma-miR482b-3p, csi-miR472, gma-miR482d-3p, rgl-miR5573, nta-miR482d, ddi-miR-7131a-3p, sbi-miR2118-3p, bdi-miR7739-3p, ata-miR2118c-3p, ata-miR2118b-5p, ata-miR2118d…
UKL5 At3g27440 K1G2.27	28	zma-miR167f-3p, ppt-miR1028a-3p, bna-miR1140, mtr-miR2587a, mtr-miR2587b, mtr-miR2587c, mtr-miR2587d, mtr-miR2587e, mtr-miR2587f, mtr-miR2592a-5p, osa-miR2929, mtr-miR5281b, mtr-miR5281c, mtr-miR5281d, mtr-miR5281e, mtr-miR5281f, gma-miR5368, bra-miR1140, hci-miR156a, mdm-miR7124a, mdm-miR7124b, mtr-miR2587g, stu-miR8011a-5p, stu-miR8008b, ath-miR8169, bdi-miR5281b, bdi-miR5281a, bra-miR9563a-3p
LECRK91 At5g10530 F12B17.120	28	ath-miR156g, ath-miR857, smo-miR156a, gma-miR1529, mtr-miR1509b, aly-miR156g-5p, aly-miR857-3p, gma-miR4351, bdi-miR5185a-5p, bdi-miR5185b-5p, mtr-miR5227, rgl-miR5574, ath-miR5644, nta-miR156f, mdm-miR7128, bdi-miR159b-3p.2, bdi-miR5185c-5p, bdi-miR5185d-5p, bdi-miR5185e-5p, bdi-miR5185f-5p, bdi-miR5185g-5p, bdi-miR5185h-5p, bdi-miR5185i-5p, bdi-miR5185j-5p, bdi-miR5185k-5p, bdi-miR7727-5p, gra-…
At4g13710 F18A5.100	28	osa-miR168a-3p, ath-miR426, zma-miR168a-3p, zma-miR168b-3p, ppt-miR390c-5p, ath-miR472-3p, ppt-miR477c, ppt-miR477a-5p, ppt-miR477d, tae-miR1124, ppt-miR477b, mtr-miR1510a-5p, mtr-miR2672, zma-miR169n-3p, ghr-miR482a, aly-miR472-3p, aly-miR851-5p, aly-miR3436-3p, hvu-miR168-3p, bdi-miR168-3p, mtr-miR5251, sly-miR482e-3p, gma-miR5676, ptc-miR477d-5p, sbi-miR5568c-3p, stu-miR7983-5p, bdi-miR9497, a…
FLZ6 DUF581-6 At1g78020 F28K19.24	28	osa-miR437, sbi-miR437a, sbi-miR437b, sbi-miR437c, sbi-miR437d, sbi-miR437e, sbi-miR437f, sbi-miR437g, sbi-miR437i, sbi-miR437j, sbi-miR437k, sbi-miR437l, sbi-miR437m, sbi-miR437n, sbi-miR437o, sbi-miR437p, sbi-miR437q, sbi-miR437r, sbi-miR437s, sbi-miR437t, sbi-miR437u, sbi-miR437v, sbi-miR437w, aly-miR163-3p.2, vvi-miR3640-5p, ssp-miR437a, ssp-miR437b, osa-miR5791
FLZ6 DUF581-6 At1g78020 F28K19.24	28	osa-miR171i-3p, mtr-miR171b, ppt-miR171b, smo-miR171a, vvi-miR171b, vvi-miR171f, vvi-miR171h, sly-miR171d, sbi-miR171h, zma-miR171l-3p, zma-miR171m-3p, gma-miR4382, csi-miR171a, gma-miR171k-3p, ssl-miR171b, gma-miR5784, mes-miR171a, nta-miR171b, mdm-miR171j, mdm-miR171k, mdm-miR171l, cme-miR171h, ghr-miR7508, lja-miR171b, lja-miR171d-5p, bdi-miR166i-5p, stu-miR171b-3p, sly-miR171e
FLZ5 DUF581-2 At1g22160 F2E2.23	28	osa-miR171i-3p, mtr-miR171b, ppt-miR171b, smo-miR171a, vvi-miR171b, vvi-miR171f, vvi-miR171h, sly-miR171d, sbi-miR171h, zma-miR171l-3p, zma-miR171m-3p, gma-miR4382, gma-miR4393a, csi-miR171a, gma-miR171k-3p, ssl-miR171b, gma-miR5784, mes-miR171a, nta-miR171b, mdm-miR171j, mdm-miR171k, mdm-miR171l, cme-miR171h, lja-miR171b, lja-miR171d-5p, bdi-miR166i-5p, stu-miR171b-3p, sly-miR171e
IQD1 At3g09710 F11F8.30	28	osa-miR171i-3p, mtr-miR171b, ppt-miR171b, smo-miR171a, vvi-miR171b, vvi-miR171f, vvi-miR171h, sly-miR171d, sbi-miR171h, zma-miR171l-3p, zma-miR171m-3p, gma-miR4382, csi-miR171a, gma-miR171k-3p, ssl-miR171b, gma-miR5784, mes-miR171a, nta-miR171b, mdm-miR171j, mdm-miR171k, mdm-miR171l, cme-miR171h, ghr-miR7508, lja-miR171b, lja-miR171d-5p, bdi-miR166i-5p, stu-miR171b-3p, sly-miR171e
IQD1 At3g09710 F11F8.30	28	ppt-miR533a-3p, ath-miR865-3p, ppt-miR533c, ppt-miR533d, gma-miR482a-3p, gma-miR1507a, mtr-miR1507-3p, gma-miR1507b, vun-miR1507a, vun-miR1507b, mtr-miR2595, gra-miR482, gso-miR1507a, gso-miR1507b, ath-miR4239, pab-miR3709b, sly-miR482a, mtr-miR5557-3p, gma-miR5678, vun-miR482, stu-miR482a-3p, nta-miR482a, sly-miR6027-3p, stu-miR6027, nta-miR482c, mtr-miR7696c-5p, bdi-miR7757-5p.1, tae-miR7757-5p
PAIR3 Os10g0405500 LOC_Os10g26560 OsJ_31462 OSJNBa0060A14.5	27	zma-miR159c-5p, zma-miR159d-5p, ptc-miR397b, ath-miR845b, tae-miR1139, vvi-miR399f, bdi-miR1139, mtr-miR2656a, mtr-miR2656b, mtr-miR2668, osa-miR2876-5p, zma-miR397a-5p, zma-miR397b-5p, aly-miR319c-5p, aly-miR166f-5p, aly-miR319d-5p, bdi-miR319b-5p, mtr-miR5253, gma-miR3522, ssl-miR1078, dpr-miR397, mtr-miR2656c, mtr-miR2656d, mtr-miR2656e, mtr-miR319d-5p, stu-miR7992-3p, aly-miR166h-5p
PCMP-H61 At5g66520 K1F13.18	27	ath-miR159b-3p, ath-miR159c, osa-miR159c, osa-miR159d, osa-miR159e, sof-miR159c, zma-miR159c-3p, zma-miR159d-3p, sbi-miR159b, ptc-miR159d, pta-miR159a, pta-miR159b, pta-miR159c, smo-miR159, zma-miR159e-3p, aly-miR159b-3p, aly-miR159c-3p, bdi-miR159a-3p, sbi-miR5565c, sbi-miR5565a, sbi-miR5565b, pde-miR159, mdm-miR159a, mdm-miR159b, cme-miR159b, cpa-miR159b, bdi-miR159c
ALATS ALARS At1g50200 F14I3.17	27	osa-miR169n, osa-miR169o, sbi-miR169i, ptc-miR169q, ptc-miR169u-5p, ath-miR832-3p, mtr-miR2624, zma-miR169o-5p, aly-miR161-3p.1, aly-miR169n-5p, tcc-miR169f, osa-miR5155, bdi-miR169d, osa-miR5491, cme-miR169o, cme-miR169d, cme-miR169c, cme-miR169m, cme-miR169j, cme-miR169b, cme-miR169a, cme-miR169i, cme-miR169l, stu-miR7997a, stu-miR7997b, sly-miR169e-5p, tae-miR5050
BGLU16 Os04g0513400 LOC_Os04g43390 OSJNBa0004N05.24 OSJNBb0070J16.1	27	ppt-miR535a, ppt-miR535b, ppt-miR535c, osa-miR535-5p, ppt-miR535d, ath-miR776, ppt-miR1038-5p, smo-miR1098, vvi-miR535a, vvi-miR535b, vvi-miR535c, osa-miR2101-5p, mtr-miR2680a, mtr-miR2680b, mtr-miR2680c, mtr-miR2680d, mtr-miR2680e, aqc-miR535, osa-miR2929, rco-miR535, pab-miR535, far-miR437, bdi-miR5164, bdi-miR5180a, mdm-miR535a, stu-miR8048-5p, cpa-miR535
FLU At3g14110 MAG2.7	27	ath-miR420, zma-miR166l-5p, ath-miR824-5p, ppt-miR904a, ppt-miR904b, bol-miR824, bra-miR824, bna-miR824, osa-miR2873a, aly-miR824-5p, ath-miR3434-3p, ahy-miR3513-3p, bdi-miR1878-5p, bdi-miR172a-5p, bdi-miR398b, mtr-miR5204, sbi-miR5568a, bra-miR5721, ddi-miR-7105, sbi-miR5568g-3p, mtr-miR7701-3p, ptc-miR7818, stu-miR319-5p, gra-miR8695, gra-miR8723a, gma-miR9745, ata-miR172b-5p
FLZ14 DUF581-15 At5g20700 T1M15.100	27	ath-miR171a-3p, osa-miR171a, zma-miR171a-5p, ath-miR856, bna-miR171g, cre-miR1150.1, bna-miR171f, vvi-miR171e, gma-miR1520a, bra-miR171e, sbi-miR171g, sbi-miR171j, bdi-miR171a, zma-miR171n-3p, ccl-miR171, aly-miR171a-3p, aly-miR4243, pab-miR3709a, tcc-miR171a, cca-miR171, mdm-miR171c, mdm-miR171d, mdm-miR171e, cme-miR171e, cme-miR171a, cme-miR171g, stu-miR8048-5p
COL13 At2g47890 F17A22.28 T9J23	27	mtr-miR2592b-5p, mtr-miR2592d-5p, mtr-miR2592e-5p, mtr-miR2592o-5p, mtr-miR2592q-5p, mtr-miR2592s-5p, mtr-miR2592t, mtr-miR2592u, mtr-miR2592v, mtr-miR2592w, mtr-miR2592x, mtr-miR2592y, mtr-miR2592z, mtr-miR2592ab, mtr-miR2592ac, mtr-miR2592ad, mtr-miR2592ae, mtr-miR2592af, mtr-miR2592ah, mtr-miR2592ai, mtr-miR2592aj, mtr-miR2592al, mtr-miR2592am, bra-miR5654a, bra-miR5654b, lja-miR7525, gma-miR9…
VP15	27	mtr-miR2592b-5p, mtr-miR2592d-5p, mtr-miR2592e-5p, mtr-miR2592o-5p, mtr-miR2592q-5p, mtr-miR2592s-5p, osa-miR2870, osa-miR2878-3p, mtr-miR2592t, mtr-miR2592u, mtr-miR2592v, mtr-miR2592w, mtr-miR2592x, mtr-miR2592y, mtr-miR2592z, mtr-miR2592ab, mtr-miR2592ac, mtr-miR2592ad, mtr-miR2592ae, mtr-miR2592af, mtr-miR2592ah, mtr-miR2592ai, mtr-miR2592aj, mtr-miR2592al, mtr-miR2592am, hvu-miR6212, gma-miR…
At3g47200 F13I12.250	27	ath-miR391-5p, osa-miR1866-5p, zma-miR2275b-3p, zma-miR2275c-3p, aly-miR391-5p, vvi-miR3629a-3p, vvi-miR3629b, vvi-miR3629c, ssp-miR1432, bdi-miR5201-3p, osa-miR5502, ath-miR5635a, ath-miR5635d, ath-miR5635b, ath-miR5635c, bra-miR5713, mtr-miR5225b, mtr-miR5225c, hme-let-7, mdm-miR3627a, mdm-miR3627b, mdm-miR3627c, ptc-miR7821, stu-miR3627-5p, bdi-miR2275a, tae-miR2275-3p, bra-miR391-5p
TBL12 At5g64470 T12B11.6	27	ath-miR399a, osa-miR399k, sbi-miR399g, mtr-miR399d, mtr-miR399c, zma-miR399f-3p, ptc-miR472b, mtr-miR399h, mtr-miR399i, mtr-miR399m, mtr-miR399n, ppt-miR1223h, ppt-miR1223i, mdm-miR482a-3p, osa-miR2118b, osa-miR2118g, osa-miR2118n, zma-miR2118b, zma-miR2118c, ghr-miR399d, aly-miR399f-3p, aly-miR774b-3p, ghr-miR3476-3p, mtr-miR5231, cca-miR399, ptc-miR7838, ata-miR2118b-5p
At3g04600 F7O18.7	27	mtr-miR319a-3p, gma-miR319a, gma-miR319b, ptc-miR319a, ptc-miR319b, ptc-miR319c, ptc-miR319d, ppt-miR319a, ppt-miR319b, ppt-miR319c, ppt-miR319d-3p, mtr-miR319b-3p, ppt-miR319e, ppt-miR897, pta-miR159a, pta-miR319, vvi-miR319g, sly-miR319a, ctr-miR319, gma-miR319e, mtr-miR5253, pti-miR5481, cme-miR319b, cme-miR319a, lja-miR7521, mtr-miR319c-3p, gma-miR319p
DTX18 LAL5 At3g23550 MDB19.3	27	mtr-miR319a-3p, gma-miR319a, gma-miR319b, ptc-miR319a, ptc-miR319b, ptc-miR319c, ptc-miR319d, ppt-miR319a, ppt-miR319b, ppt-miR319c, ppt-miR319d-3p, mtr-miR319b-3p, ppt-miR319e, ppt-miR897, pta-miR159a, pta-miR319, vvi-miR319g, sly-miR319a, ctr-miR319, gma-miR319e, mtr-miR5253, pti-miR5481, cme-miR319b, cme-miR319a, lja-miR7521, mtr-miR319c-3p, gma-miR319p
At5g06060 K16F4.2	27	osa-miR166c-5p, ppt-miR1023a-3p, ppt-miR1039-3p, smo-miR156d, ptc-miR1448, aqu-miR-2021-5p, bdi-miR399a, mtr-miR2640, mtr-miR2661, aly-miR856-5p, osa-miR5338, gma-miR397b-3p, gma-miR166i-5p, sbi-miR5565a, sbi-miR5565b, ath-miR5638a, ath-miR5662, ssl-miR399, stu-miR482e-3p, sly-miR482c, gma-miR6299, hme-miR-2733, hbr-miR156, mtr-miR2592bp-3p, bdi-miR7743-5p, stu-miR166d-5p, sly-miR9478-5p
PUMP5 DIC1 UCP5 At2g22500 F14M13.10	27	ath-miR397a, osa-miR397a, osa-miR169i-3p, ptc-miR397a, osa-miR395v, cre-miR906-5p, cre-miR917, vvi-miR397a, sbi-miR397-5p, bdi-miR397a, osa-miR2929, rco-miR397, aly-miR397a-5p, aly-miR397b-5p, esi-miR3455-3p, pab-miR397, gma-miR4355, csi-miR397, tcc-miR397, gma-miR397a, gma-miR397b-5p, ssl-miR397, mdm-miR482c, cme-miR397, mtr-miR397-5p, bdi-miR397b-5p, ata-miR9674b-5p
PUMP5 DIC1 UCP5 At2g22500 F14M13.10	27	ath-miR397a, osa-miR397a, osa-miR169i-3p, ptc-miR397a, osa-miR395v, cre-miR906-5p, cre-miR917, vvi-miR397a, sbi-miR397-5p, bdi-miR397a, osa-miR2929, rco-miR397, aly-miR397a-5p, aly-miR397b-5p, esi-miR3455-3p, pab-miR397, gma-miR4355, csi-miR397, tcc-miR397, gma-miR397a, gma-miR397b-5p, ssl-miR397, mdm-miR482c, cme-miR397, mtr-miR397-5p, bdi-miR397b-5p, ata-miR9674b-5p
BASS2 SBF1 Os01g0645200 LOC_Os01g45750 OsJ_02805 P0707D10.23-1	27	ath-miR167c-3p, mtr-miR2086-3p, aqc-miR477f, ghr-miR2949a-3p, aly-miR167c-3p, aly-miR828-3p, gma-miR4375, bdi-miR5185a-5p, bdi-miR5185b-5p, aau-miR2086, amg-miR2086, mtr-miR2592bm-5p, mtr-miR2592bn-5p, mtr-miR167b-3p, hme-miR-2767, sbi-miR6231-5p, bdi-miR5185c-5p, bdi-miR5185d-5p, bdi-miR5185e-5p, bdi-miR5185f-5p, bdi-miR5185g-5p, bdi-miR5185h-5p, bdi-miR5185i-5p, bdi-miR5185j-5p, bdi-miR5185k-5p…
RER3 At3g08640 F17O14.11	27	ath-miR163, zma-miR171k-5p, zma-miR171h-5p, ppt-miR1222a, ath-miR840-3p, ath-miR840-3p, cre-miR1145.1, vvi-miR479, ath-miR1886.2, ghr-miR479, aly-miR157d-3p, aly-miR840-3p, aly-miR840-3p, aly-miR163-3p.1, gma-miR4364b, csi-miR479, osa-miR5532, ath-miR5650, nta-miR479a, mdm-miR7125, ghr-miR7507, bdi-miR5167b-3p, stu-miR7991a, stu-miR7991b, stu-miR7991c, tae-miR1137b-5p, ata-miR171a-5p
ADIPOR2 Os02g0179500 LOC_Os02g08320 P0544B02.25	27	ath-miR828, gma-miR1522, vvi-miR828a, aly-miR828-5p, osa-miR5161, pti-miR5477, mtr-miR5555-5p, ath-miR5641, ssl-miR828, gma-miR828a, gma-miR828b, gma-miR156ab, hme-miR-1a, ptc-miR828a, ptc-miR828b-5p, mdm-miR828a, mdm-miR828b, cme-miR828, sbi-miR6218-5p, mes-miR828a, mes-miR828b, stu-miR8047, gra-miR8656, bdi-miR9486b, tae-miR9772, ata-miR9772a-5p, ata-miR9772b-5p
BIM2 BHLH102 EN125 At1g69010 T6L1.19	26	ath-miR399c-5p, cre-miR1153-3p.2, osa-miR1850.2, mtr-miR2612, zma-miR399g-5p, aly-miR399b-5p, aly-miR399c-5p, mdm-miR2118a, mdm-miR2118b, mdm-miR2118c, cme-miR399g, stu-miR399a-5p, stu-miR399b-5p, stu-miR399c-5p, stu-miR399d-5p, stu-miR399e-5p, stu-miR399f-5p, stu-miR399g-5p, stu-miR399h, stu-miR399j-5p, stu-miR399k-5p, stu-miR399l-5p, stu-miR399m-5p, stu-miR399n-5p, stu-miR399o-5p, ata-miR399a-5p
GLUTRBP PGR7 At3g21200 MXL8.5	26	ath-miR846-3p, cre-miR905-3p, tae-miR1137a, sbi-miR1432, mtr-miR2659a, mtr-miR2659b, mtr-miR2659c, mtr-miR2659d, mtr-miR2659e, mtr-miR2659f, zma-miR1432-5p, aly-miR846-3p, pab-miR3705, gma-miR1520o, ssp-miR1432, bdi-miR5201-3p, hme-miR-308, ptc-miR6426a, ptc-miR6426b, mtr-miR2659g, mtr-miR2659h, mtr-miR2659i, mtr-miR2659j, mtr-miR2659k, bdi-miR7731-5p, ata-miR5070-3p
COL5 At5g57660 MRI1.1	26	ath-miR831-3p, mtr-miR2592b-3p, mtr-miR2592c, mtr-miR2592d-3p, mtr-miR2592e-3p, mtr-miR2592f, mtr-miR2592i, mtr-miR2592j, mtr-miR2592o-3p, mtr-miR2592p, mtr-miR2592q-3p, mtr-miR2592r, mtr-miR2592a.2-3p, mtr-miR2592g, mtr-miR2592h, mtr-miR2592k, mtr-miR2592l, mtr-miR2592m, mtr-miR2592n, esi-miR3461-5p, csi-miR857, mtr-miR2592an, mtr-miR2592ao, mtr-miR2592bo-3p, mtr-miR2592bp-5p, mtr-miR2592br-3p
COL5 At5g57660 MRI1.1	26	osa-miR166g-3p, osa-miR166h-3p, sbi-miR166f, zma-miR166l-3p, zma-miR166m-3p, mtr-miR166b, mtr-miR166c, mtr-miR166f, sbi-miR166k, aqc-miR166a, aqc-miR166c, aqc-miR166d, aly-miR165a-3p, aly-miR165b-3p, pab-miR166a, far-miR166, tcc-miR166c, ssl-miR166a, gma-miR5768, dpr-miR166a, cme-miR166e, mes-miR166j, stu-miR166b, gra-miR8679, gra-miR7502f, sly-miR166c-3p
VHA-c''2 VMA16 At2g25610 F3N11.6	26	osa-miR166g-3p, osa-miR166h-3p, sbi-miR166f, zma-miR166l-3p, zma-miR166m-3p, mtr-miR166b, mtr-miR166c, mtr-miR166f, sbi-miR166k, aqc-miR166a, aqc-miR166c, aqc-miR166d, aly-miR165a-3p, aly-miR165b-3p, pab-miR166a, far-miR166, tcc-miR166c, ssl-miR166a, gma-miR5768, dpr-miR166a, cme-miR166e, mes-miR166j, stu-miR166b, gra-miR8679, gra-miR7502f, sly-miR166c-3p
TIC22 IAP25	26	ptc-miR172b-5p, ptc-miR172g-5p, ptc-miR172h-5p, cre-miR905-5p, ppt-miR1067, mtr-miR2652a, mtr-miR2652b, mtr-miR2652c, mtr-miR2652d, mtr-miR2652e, mtr-miR2652f, mtr-miR2652g, mtr-miR2652h, mtr-miR2652i, mtr-miR2652j, mtr-miR2652k, mtr-miR2652l, osa-miR2931, aly-miR172c-5p, bdi-miR5178-5p, ath-miR5664, mtr-miR2652m, stu-miR6149-5p, stu-miR172d-5p, aly-miR172f-5p, gra-miR8699
At5g08180 T22D6.120	26	ptc-miR478h, ptc-miR478i, ptc-miR478j, ptc-miR478k, ptc-miR478l, ptc-miR478m, ptc-miR478o, ptc-miR478q, ptc-miR478r, ptc-miR478s, ptc-miR478n, ath-miR868-5p, ghr-miR156c, osa-miR1861e, osa-miR1861g, osa-miR1861k, osa-miR1861m, vvi-miR3634-3p, gma-miR5035-3p, mtr-miR5224b, gma-miR4401b, mtr-miR5740, hme-miR-6306-5p, sbi-miR6232b-3p, tae-miR397-5p, gma-miR9753
VSR6 BP80D ELP6 At1g30900 F17F8.23	26	ath-miR172b-5p, ath-miR172e-5p, osa-miR172d-5p, gma-miR172b-5p, ppt-miR1028c-3p, cre-miR1152, bra-miR172b-5p, aly-miR172b-5p, aly-miR172e-5p, aly-miR774a-3p.2, aly-miR4232, gma-miR5371-3p, gma-miR172g, gma-miR172h-5p, gma-miR172i-5p, gma-miR172j, osa-miR2275d, mdm-miR393d, mdm-miR393e, mdm-miR393f, stu-miR4376-3p, stu-miR172b-5p, stu-miR393-3p, tae-miR9671-5p, ata-miR2275a-3p, ata-miR172a-5p
MODD Os03g0214200 LOC_Os03g11550	26	ppt-miR535a, ppt-miR535b, ppt-miR535c, osa-miR535-5p, ppt-miR535d, ath-miR776, ppt-miR1038-5p, smo-miR1098, vvi-miR535a, vvi-miR535b, vvi-miR535c, osa-miR2101-5p, mtr-miR2680a, mtr-miR2680b, mtr-miR2680c, mtr-miR2680d, mtr-miR2680e, aqc-miR535, osa-miR2929, rco-miR535, pab-miR535, bdi-miR5164, bdi-miR5180a, mdm-miR535a, stu-miR8048-5p, cpa-miR535
MPSR1 At1g26800 T24P13.19	26	ppt-miR535a, ppt-miR535b, ppt-miR535c, osa-miR535-5p, ppt-miR535d, ath-miR776, ppt-miR1038-5p, smo-miR1098, vvi-miR535a, vvi-miR535b, vvi-miR535c, osa-miR2101-5p, mtr-miR2680a, mtr-miR2680b, mtr-miR2680c, mtr-miR2680d, mtr-miR2680e, aqc-miR535, osa-miR2929, rco-miR535, pab-miR535, bdi-miR5164, bdi-miR5180a, mdm-miR535a, stu-miR8048-5p, cpa-miR535
ASD1 ARAF ARAF1 At3g10740 T7M13.18	26	mtr-miR2592b-5p, mtr-miR2592d-5p, mtr-miR2592e-5p, mtr-miR2592o-5p, mtr-miR2592q-5p, mtr-miR2592s-5p, mtr-miR2592t, mtr-miR2592u, mtr-miR2592v, mtr-miR2592w, mtr-miR2592x, mtr-miR2592y, mtr-miR2592z, mtr-miR2592ab, mtr-miR2592ac, mtr-miR2592ad, mtr-miR2592ae, mtr-miR2592af, mtr-miR2592ah, mtr-miR2592ai, mtr-miR2592aj, mtr-miR2592al, mtr-miR2592am, mtr-miR5245, ptc-miR6461, pde-miR949a
Os09g0533400 LOC_Os09g36300 OJ1112_E07.9 OsJ_30122 P0515E01.28	26	ath-miR780.1, ath-miR864-5p, ppt-miR902b-5p, cre-miR908.3, ppt-miR902c-5p, ppt-miR902d-5p, ppt-miR902e-5p, ppt-miR902f-5p, ppt-miR902g-5p, ppt-miR902j-5p, aly-miR860-3p, aly-miR402-3p, aly-miR837-5p, ath-miR773b-5p, vvi-miR3624-3p, osa-miR3981-3p, mtr-miR2643b-5p, mtr-miR2590g, mtr-miR5745b, osa-miR5789, cca-miR6106-3p, nta-miR6025c, nta-miR6025d, gra-miR8756, sly-miR9476-5p, tae-miR9655-3p
RSH1 Os03g0340900 LOC_Os03g22160 OsJ_10786	26	ath-miR408-3p, ptc-miR408-3p, pta-miR408, ppt-miR408b, cre-miR1156.1, vvi-miR408, osa-miR2931, aly-miR408-3p, ahy-miR408-3p, csi-miR408, gma-miR408d, gma-miR408a-3p, gma-miR408b-3p, gma-miR408c-3p, mtr-miR408-3p, vun-miR408, mes-miR408, cca-miR408, nta-miR408, mdm-miR408a, cme-miR408, bdi-miR7730-3p, stu-miR408b-3p, esi-miR8618b, bdi-miR9496, ata-miR408-3p
CPN60B4 Cpn60-B(4) At1g26230 F28B23.11	26	ath-miR390a-3p, osa-miR419, ptc-miR390d-3p, gma-miR390a-3p, sly-miR397, osa-miR1320-3p, aqu-miR-2016-5p, aqc-miR477f, aly-miR390a-3p, csi-miR3948, gma-miR390c, mtr-miR5745b, nta-miR827, mdm-miR397a, mdm-miR397b, mes-miR390, mes-miR397, lja-miR390a-3p, lja-miR390b-3p, bdi-miR397b-5p, stu-miR827-3p, stu-miR397-5p, sly-miR390a-3p, sly-miR390b-3p, ata-miR9863a-3p, ata-miR9863b-3p
AIRP2 At5g01520 F7A7_40	26	osa-miR171h, sbi-miR171e, zma-miR171k-3p, zma-miR171h-3p, sbi-miR171f, ptc-miR171l-3p, ptc-miR171m, ptc-miR171j, gma-miR171b-3p, vvi-miR171g, csi-miR171b, osa-miR3979-3p, ath-miR5016, mtr-miR171h, mtr-miR5560-3p, mtr-miR171g, gma-miR171r, gma-miR171s, hvu-miR6210, hme-miR-9a, mdm-miR171i, lja-miR171c, bdi-miR7738-5p, stu-miR479, bdi-miR171f, ata-miR171a-3p
IDM1 ROS4 At3g14980 K15M2.12	26	ppt-miR537a, ppt-miR537b, osa-miR814a, osa-miR814b, osa-miR814c, ppt-miR537c, ppt-miR537d, ppt-miR1055, gma-miR1526, ath-miR3933, bdi-miR5166, mtr-miR5289a, mtr-miR5289b, mtr-miR5555-5p, mtr-miR5758, gma-miR5782, osa-miR5809, mdm-miR482c, sbi-miR5568e-5p, bdi-miR5185m-3p, bdi-miR7721-5p, stu-miR7993b-5p, gra-miR8636, gra-miR8781b, ata-miR9672-5p, ata-miR9672-5p
RPL27AC At1g70600 F24J13.17 F5A18.22	26	osa-miR399h, zma-miR171j-5p, ath-miR829-3p.2, mtr-miR156d-3p, ppt-miR1043-5p, ppt-miR1061-5p, cre-miR1155, osa-miR1862d, aly-miR319a-5p, aly-miR173a-3p, aly-miR398c-5p, esi-miR3459-3p, gma-miR5371-5p, osa-miR5521, ath-miR5651, bra-miR5654a, bra-miR5654b, bra-miR5725, hme-miR-307, aly-miR173b-3p, esi-miR8618b, gra-miR8686, bra-miR9559-5p, tae-miR5048-5p, bra-miR319-5p, bra-miR398-5p
CYPRO4	26	mtr-miR2630a, mtr-miR2630b, mtr-miR2630c, mtr-miR2630w, mtr-miR2630x, mtr-miR2630y, mtr-miR2630d, mtr-miR2630e, mtr-miR2630f, mtr-miR2630g, mtr-miR2630h, mtr-miR2630i, mtr-miR2630j, mtr-miR2630k, mtr-miR2630l, mtr-miR2630m, mtr-miR2630n, mtr-miR2630o, mtr-miR2630p, mtr-miR2630q, mtr-miR2630r, mtr-miR2630s, mtr-miR2630t, mtr-miR2630u, mtr-miR2630v, esi-miR3459-3p
At3g51070 F24M12.110	26	ppt-miR537a, ppt-miR537b, ppt-miR477c, ppt-miR477a-5p, ppt-miR477f, ppt-miR477g-5p, ppt-miR160g, ppt-miR160h, ppt-miR477d, ppt-miR477e, ppt-miR477h, ppt-miR537c, ppt-miR537d, ppt-miR1039-5p, ppt-miR477b, cre-miR1157-3p, vvi-miR477a, mtr-miR2673a, mtr-miR2673b, vvi-miR3630-3p, csi-miR477c, osa-miR5805, dpr-miR160, mes-miR477h, mes-miR477f, mes-miR477g
TOP6B OsI_30680	26	ath-miR407, osa-miR171c-5p, zma-miR171c-5p, ptc-miR171a-5p, ath-miR866-3p, ppt-miR1040, osa-miR1863a, osa-miR1863b, aly-miR319a-5p, aly-miR391-3p, aly-miR823-3p, esi-miR3450-3p, aly-miR4248a, aly-miR4248b, aly-miR4248c, vvi-miR3632-3p, pab-miR1863, gma-miR5031, osa-miR5079a, mtr-miR5247, ptc-miR6434, cme-miR1863, bdi-miR7783-3p, rgl-miR7798, osa-miR5079b, bra-miR319-5p
TOP6B OsI_30680	26	ptc-miR477a-5p, ptc-miR477b, ppt-miR538a, ppt-miR538b, ppt-miR538c, ppt-miR1212, pta-miR156a, pta-miR156b, smo-miR156b, cre-miR1143-3p, osa-miR1847.1, mtr-miR2199, mtr-miR5213-3p, osa-miR5340, mtr-miR5554a-5p, mtr-miR5554b-5p, mtr-miR5554c-5p, cca-miR6116-5p, ptc-miR6432, ptc-miR169ag, mdm-miR156p, mdm-miR156r, mdm-miR156s, bdi-miR7770-3p, bol-miR9410, sly-miR5302b-3p
At4g14190 dl3135c FCAALL.115	26	ath-miR867, cre-miR919.1, pta-miR156a, ppt-miR1223b, ppt-miR1223c, ppt-miR1223d, ppt-miR1051-3p, smo-miR1104, tae-miR1131, gma-miR1514a-5p, gma-miR1514b-5p, mtr-miR2087-5p, zma-miR408b-5p, vvi-miR3626-3p, osa-miR5519, mtr-miR5555-5p, ath-miR5646, mtr-miR5759, bna-miR6032, ghr-miR7498, stu-miR8008a, stu-miR8009, stu-miR8031, cpa-miR8147, sly-miR9472-3p, ata-miR167c-3p
MENG At1g23360 F26F24.24	25	osa-miR156b-3p, ath-miR781a, ppt-miR1023a-5p, cre-miR1148.1, mtr-miR2652a, mtr-miR2652b, mtr-miR2652c, mtr-miR2652d, mtr-miR2652e, mtr-miR2652f, mtr-miR2652g, mtr-miR2652h, mtr-miR2652i, mtr-miR2652j, mtr-miR2652k, mtr-miR2652l, aly-miR156f-3p, aly-miR781-5p, osa-miR5505, ath-miR781b, osa-miR5794, mtr-miR2652m, stu-miR6149-5p, bra-miR156b-3p, bra-miR156d-3p
NFD4 At1g31470 T8E3.15	25	zma-miR168a-3p, ptc-miR475c, pta-miR482a, pta-miR482b, smo-miR1092, ddi-miR-1176, pta-miR482c, vvi-miR482, osa-miR2092-5p, pab-miR482a, pab-miR482b, pab-miR482c, osa-miR812n-3p, gma-miR4413b, mtr-miR2619b-3p, bra-miR5654a, bra-miR5654b, osa-miR812t, osa-miR812u, pde-miR482a, pde-miR482b, rgl-miR7802, cpa-miR8153, gra-miR8734, gma-miR9749
WRKY53 At4g23810 F9D16.280	25	ath-miR164b-3p, zma-miR164c-3p, ptc-miR478f, cre-miR910, aqu-miR-2018-5p, pvu-miR2118, zma-miR164h-3p, aly-miR164b-3p, gso-miR2218, gma-miR2118a-3p, gma-miR2118b-3p, hme-miR-2788-3p, hvu-miR5048a, bdi-miR164a-3p, bdi-miR5181d, sbi-miR5386, ath-miR5638a, vun-miR2118, osa-miR5833, hvu-miR5048b, mdm-miR482b, stu-miR7987, gra-miR7484f, tae-miR9674a-5p, ata-miR5181-3p
HIPP39 At1g01490 F22L4.5	25	osa-miR443, zma-miR167f-3p, osa-miR2275a, osa-miR2275b, zma-miR2275a-3p, zma-miR2275b-3p, zma-miR2275c-3p, zma-miR2275d-3p, hvu-miR171-5p, bdi-miR171d-5p, osa-miR5512a, ath-miR5628, nta-miR6153, osa-miR5512b, mes-miR2275, stu-miR7993b-5p, ath-miR8165, bdi-miR2275a, bdi-miR2275b, bdi-miR2275c, tae-miR2275-3p, ata-miR2275a-3p, ata-miR2275b-3p, ata-miR2275c-3p, ata-miR171d-5p
IRK At3g56370 T5P19.20	25	osa-miR443, zma-miR167f-3p, osa-miR2275a, osa-miR2275b, zma-miR2275a-3p, zma-miR2275b-3p, zma-miR2275c-3p, zma-miR2275d-3p, hvu-miR171-5p, bdi-miR171d-5p, osa-miR5512a, ath-miR5628, nta-miR6153, osa-miR5512b, mes-miR2275, stu-miR7993b-5p, ath-miR8165, bdi-miR2275a, bdi-miR2275b, bdi-miR2275c, tae-miR2275-3p, ata-miR2275a-3p, ata-miR2275b-3p, ata-miR2275c-3p, ata-miR171d-5p
RAD23B RAD23 RAD23-1 At1g79650 F20B17.8	25	ath-miR835-3p, mtr-miR2659a, mtr-miR2659b, mtr-miR2659c, mtr-miR2659d, mtr-miR2659e, mtr-miR2659f, ath-miR2934-5p, aly-miR835-3p, gma-miR4378b, gma-miR5370, ptc-miR6476a, hbr-miR6484, sbi-miR6231-5p, mtr-miR2659g, mtr-miR2659h, mtr-miR2659i, mtr-miR2659j, mtr-miR2659k, bdi-miR7725b-3p.2, ptc-miR6476b, ptc-miR6476c, ptc-miR7827, gra-miR8655, gra-miR8756
CAMTA2 CMTA2 SR4 At5g64220 MSJ1.6	25	ppt-miR535a, ppt-miR535b, ppt-miR535c, osa-miR535-5p, ppt-miR535d, ath-miR776, ppt-miR1038-5p, smo-miR1098, vvi-miR535a, vvi-miR535b, vvi-miR535c, osa-miR2101-5p, mtr-miR2680a, mtr-miR2680b, mtr-miR2680c, mtr-miR2680d, mtr-miR2680e, aqc-miR535, osa-miR2929, rco-miR535, pab-miR535, bdi-miR5164, bdi-miR5180a, mdm-miR535a, cpa-miR535
CAMTA2 CMTA2 SR4 At5g64220 MSJ1.6	25	gma-miR172b-5p, osa-miR1435, gma-miR1536, sbi-miR1435a, esi-miR3454e-5p, mtr-miR5241a, mtr-miR5241b, mtr-miR5241c, mtr-miR172c-5p, sbi-miR5564a, bra-miR5654a, bra-miR5654b, mtr-miR396c, ptc-miR6459a-5p, ptc-miR6426a, ptc-miR6426b, sbi-miR6235-5p, lja-miR7536a, lja-miR7536b, rgl-miR7805-3p, stu-miR172e-5p, gra-miR172b, gra-miR8770, tae-miR9675-3p, bra-miR172d-5p
CAMTA2 CMTA2 SR4 At5g64220 MSJ1.6	25	ath-miR158a-5p, osa-miR408-3p, sof-miR408a, sof-miR408b, sof-miR408c, sof-miR408d, zma-miR408a, ppt-miR1052, smo-miR408, tae-miR408, sbi-miR408, zma-miR408b-3p, zma-miR482-3p, osa-miR2924, rco-miR408, aly-miR158a-5p, pab-miR3707, bdi-miR408-3p, ssp-miR408d, ssp-miR408a, dpr-miR408, bdi-miR7752-5p, cpa-miR408, bdi-miR9489, ata-miR408-3p
MTX1 At2g19080 T20K24.9	25	mtr-miR2596, mtr-miR2667a, zma-miR397a-5p, zma-miR397b-5p, aly-miR848-3p, aly-miR4244, vvi-miR3630-5p, sly-miR5304, mtr-miR2619b-5p, bna-miR6035, nta-miR6145b, hme-miR-277, ptc-miR6448, mtr-miR2667b, rgl-miR7801, stu-miR8007a-3p, stu-miR8034, stu-miR8041a-3p, stu-miR8041b-3p, stu-miR8042, stu-miR167d-3p, tae-miR9660-5p, gma-miR9732, gma-miR9766, ata-miR399b-5p
PWP2 At1g15440 F9L1.40	25	osa-miR393b-3p, zma-miR167c-3p, zma-miR393a-3p, ath-miR855, gma-miR1507a, gma-miR1507b, vun-miR1507a, vun-miR1507b, sbi-miR397-3p, mtr-miR2677, zma-miR393c-3p, gso-miR1507a, gso-miR1507b, pab-miR482d, gma-miR4376a-3p, csi-miR482a-5p, csi-miR535, gma-miR319d, gma-miR1507c-3p, bdi-miR393b-3p, gma-miR319i, bra-miR5725, tae-miR9652-3p, gma-miR319o, ata-miR393-3p
AKR4C9 At2g37770 F13M22 T8P21.32	25	osa-miR169i-5p.2, ath-miR846-5p, ath-miR865-3p, ppt-miR1223j, smo-miR1092, mtr-miR2642, mtr-miR2677, ahy-miR3512, gma-miR4358, osa-miR812n-3p, ath-miR5029, hvu-miR5048a, gma-miR5370, gma-miR5375, osa-miR5511, mtr-miR2619b-3p, osa-miR812t, osa-miR812u, hvu-miR5048b, sbi-miR6225-5p, ghr-miR7489, stu-miR169f-3p, sly-miR169e-3p, bdi-miR9496, tae-miR5048-5p
AKR4C9 At2g37770 F13M22 T8P21.32	25	osa-miR166d-5p, zma-miR166c-5p, gma-miR166a-5p, mtr-miR166g-5p, smo-miR1085-5p, bna-miR161, csi-miR166e-5p, aly-miR166a-5p, aly-miR166c-5p, aly-miR166d-5p, gma-miR166c-5p, gma-miR5042-5p, gma-miR5044, osa-miR5157a-5p, osa-miR5157b-5p, bdi-miR166e-5p, mtr-miR5219, gma-miR166l, osa-miR1319b, bdi-miR7742-5p, stu-miR166a-5p, ath-miR8166, sly-miR403-5p, sly-miR167b-3p, bra-miR161-5p
MBS1 At3g02790 F13E7.27	25	osa-miR417, pta-miR950a, pta-miR950b, bna-miR169g, bna-miR169h, bna-miR169i, bna-miR169j, bna-miR169k, bna-miR169l, vvi-miR169e, osa-miR169r-5p, zma-miR169l-5p, sbi-miR169o, bdi-miR169k-5p, pde-miR950, mdm-miR169b, cme-miR169m, cme-miR169j, cme-miR169b, cme-miR169a, cme-miR169i, cme-miR169l, ata-miR169j-5p, ata-miR169b-5p, ata-miR169a-5p
CPK23 At4g04740 T4B21.15	25	ptc-miR476a, ptc-miR476a, ptc-miR476b, ptc-miR476b, ath-miR862-5p, mtr-miR2655a, mtr-miR2655c, mtr-miR2655d, mtr-miR2655e, mtr-miR2655f, mtr-miR2655g, mtr-miR2655h, mtr-miR2655i, mtr-miR2655j, mtr-miR2655k, mtr-miR2655l, mtr-miR2655m, mtr-miR2655n, mtr-miR2655o, aly-miR862-5p, ath-miR4240, mtr-miR5749, hbr-miR476, hbr-miR476, bra-miR168a-3p
RPS9C At5g39850 MYH19.1 MYH19.10	25	ath-miR831-3p, cre-miR910, vvi-miR479, mtr-miR2087-3p, gma-miR2109-5p, mtr-miR2633, zma-miR159g-5p, zma-miR159h-5p, zma-miR159i-5p, gso-miR2109, ath-miR4228-3p, osa-miR1862f, osa-miR1862g, osa-miR5074, osa-miR5837.1, nta-miR477a, hvu-miR6199, mes-miR477i, mes-miR477a, mes-miR477b, mes-miR477c, mes-miR477e, stu-miR477a-5p, gra-miR8726, gra-miR166c
LET12	25	osa-miR166k-3p, osa-miR166l-3p, sbi-miR166e, zma-miR166k-3p, zma-miR166j-3p, sbi-miR166g, zma-miR166n-3p, aly-miR3445-3p.1, osa-miR5157a-5p, osa-miR5157b-5p, bdi-miR167d-3p, mtr-miR5235a, mtr-miR5235b, gma-miR5769, hme-miR-929, bdi-miR166h-3p, ptc-miR7837, ptc-miR7836, stu-miR1886a, stu-miR1886b, stu-miR1886c, stu-miR1886d, stu-miR1886e, stu-miR1886f, ata-miR5168-3p
	25	pta-miR947, ppt-miR1070, osa-miR1425-5p, vvi-miR395n, osa-miR2095-3p, ath-miR2936, aly-miR860-3p, ath-miR3932a, ath-miR3932b-3p, gma-miR4995, bdi-miR5058, mtr-miR5209, osa-miR5536, sbi-miR5565d, ath-miR5639-5p, gma-miR5667-5p, gma-miR5767, cca-miR6108f, nta-miR6148a, hvu-miR6210, pde-miR947, lja-miR7528, cpa-miR8143, gra-miR8736, bol-miR9409
LET12	25	osa-miR437, sbi-miR437a, sbi-miR437b, sbi-miR437c, sbi-miR437d, sbi-miR437e, sbi-miR437f, sbi-miR437g, sbi-miR437i, sbi-miR437j, sbi-miR437k, sbi-miR437l, sbi-miR437m, sbi-miR437n, sbi-miR437o, sbi-miR437p, sbi-miR437q, sbi-miR437r, sbi-miR437s, sbi-miR437t, sbi-miR437u, sbi-miR437v, sbi-miR437w, ssp-miR437a, tae-miR9652-5p
NET4B At2g30500 T6B20.15	25	ath-miR394b-3p, zma-miR159b-5p, osa-miR1432-3p, gma-miR1508a, aqc-miR167, zma-miR159j-5p, zma-miR159k-5p, zma-miR399g-3p, sbi-miR399k, aly-miR394a-3p, gso-miR1508a, gma-miR4354, gma-miR1508c, bdi-miR5177, osa-miR5523, ptc-miR6468-5p, ptc-miR6444, cme-miR167e, stu-miR8005a, stu-miR8005b-3p, stu-miR8005c, stu-miR8030-3p, stu-miR8011b-3p, gra-miR8653a, ata-miR394-3p
SAP4 At2g36320 F2H17.7	24	ath-miR161.1, ath-miR399d, osa-miR399h, ptc-miR399a, ptc-miR399d, ptc-miR399c, mtr-miR399k, vvi-miR399d, rco-miR399f, aly-miR399d-3p, aly-miR399g-3p, aly-miR399i-3p, tcc-miR399h, hvu-miR399, mtr-miR399r, osa-miR5526, ghr-miR399e, mdm-miR399e, mdm-miR399f, mdm-miR399g, mdm-miR399h, cme-miR399a, mes-miR399e, bdi-miR7711-3p.1
SAP4 At2g36320 F2H17.7	24	osa-miR2100-3p, mtr-miR2635, mtr-miR2670a, mtr-miR2670b, mtr-miR2670c, mtr-miR2670d, aly-miR156e-3p, aly-miR160b-3p, aly-miR161-3p.2, aly-miR856-5p, aly-miR861-3p, pab-miR3712, gma-miR1520q, mtr-miR5210, gma-miR5379, nta-miR6153, bdi-miR156g-3p, bdi-miR156i-3p, ptc-miR7824, stu-miR8049-3p, gra-miR8781a, bra-miR156a-3p, ata-miR156a-3p, ata-miR156e-3p
SAP4 At2g36320 F2H17.7	24	osa-miR1861d, osa-miR1861d, osa-miR1861e, osa-miR1861e, osa-miR1861g, osa-miR1861g, osa-miR1861h, osa-miR1861h, osa-miR1861j, osa-miR1861j, osa-miR1861k, osa-miR1861k, osa-miR1861m, osa-miR1861m, mtr-miR2617a, mtr-miR2617c, mtr-miR2617b, gma-miR5040, mtr-miR5250, osa-miR5490, hme-miR-190, ghr-miR7510b, ath-miR8166, gra-miR8751a
rps3	24	osa-miR166b-5p, osa-miR166d-5p, osa-miR166k-5p, zma-miR166a-5p, zma-miR166c-5p, gma-miR166a-5p, mtr-miR166g-5p, csi-miR166e-5p, aly-miR166a-5p, aly-miR166c-5p, aly-miR166d-5p, aly-miR166f-5p, aly-miR166g-5p, gma-miR166c-5p, gma-miR166h-5p, bdi-miR166b-5p, bdi-miR166e-5p, gma-miR166j-5p, gma-miR166l, stu-miR166a-5p, stu-miR166c-5p, aly-miR166h-5p, sly-miR164b-3p, ata-miR166d-5p
GTG1 At1g64990 F13O11.29	24	ath-miR158a-5p, osa-miR408-3p, sof-miR408a, sof-miR408b, sof-miR408c, sof-miR408d, zma-miR408a, smo-miR408, tae-miR408, sbi-miR408, zma-miR408b-3p, zma-miR482-3p, osa-miR2924, rco-miR408, aly-miR158a-5p, pab-miR3707, bdi-miR408-3p, ssp-miR408d, ssp-miR408a, dpr-miR408, bdi-miR7752-5p, cpa-miR408, bdi-miR9489, ata-miR408-3p
TATA THA4	24	tae-miR1121, mtr-miR2655a, mtr-miR2655c, mtr-miR2655d, mtr-miR2655e, mtr-miR2655f, mtr-miR2655g, mtr-miR2655h, mtr-miR2655i, mtr-miR2655j, mtr-miR2655k, mtr-miR2655l, mtr-miR2655m, mtr-miR2655n, mtr-miR2655o, osa-miR2918, gma-miR4383, bgy-miR529, bcy-miR529, mtr-miR396c, hme-miR-745, ghr-miR7491, gra-miR8787, ata-miR9783-5p
SAPK10 Os03g0610900 LOC_Os03g41460 OsJ_11716 OSJNBb0007E22.11	24	ath-miR773a, ppt-miR1223b, ppt-miR1223c, ppt-miR1223j, osa-miR1320-5p, bdi-miR5057, mtr-miR5210, mtr-miR5281b, mtr-miR5281c, mtr-miR5281d, mtr-miR5281e, mtr-miR5281f, gma-miR4387e, cca-miR6111-3p, nta-miR6157, hvu-miR6213, mdm-miR7127a, mdm-miR7127b, bdi-miR5174e-5p.1, bdi-miR5174b-5p, bdi-miR7771-5p, stu-miR7996a, stu-miR7996b, stu-miR7996c
FAH1 At2g34770 T29F13.2	24	ath-miR867, ppt-miR1030a, ppt-miR1030b, ppt-miR1030c, ppt-miR1030d, ppt-miR1030e, ppt-miR1030f, ppt-miR1030g, ppt-miR1030h, ppt-miR1030i, ppt-miR1030j, aly-miR169j-3p, aly-miR169k-3p, aly-miR169l-3p, aly-miR3440-5p, bdi-miR169e-3p, mtr-miR5263, ath-miR5629, hme-miR-13b, sbi-miR5568g-5p, bdi-miR7708a-3p, stu-miR530, sly-miR9472-3p, ata-miR169i-3p
DGAT3 At1g48300 F11A17.15	24	osa-miR530-5p, ppt-miR1030a, ppt-miR1030b, ppt-miR1030c, ppt-miR1030d, ppt-miR1030e, ppt-miR1030f, ppt-miR1030g, ppt-miR1030h, ppt-miR1030i, ppt-miR1030j, ptc-miR530a, aqc-miR530, aly-miR3443-3p, csi-miR530a, csi-miR530b, tcc-miR530a, tcc-miR530b, htu-miR530, cme-miR530b, cme-miR530a, mes-miR530a, mes-miR530b, stu-miR530
DGAT3 At1g48300 F11A17.15	24	ath-miR418, osa-miR418, ath-miR851-3p, ppt-miR1056, gma-miR1526, mtr-miR1507-5p, osa-miR2093-5p, sbi-miR1435a, sbi-miR1435b, mtr-miR2607, aly-miR851-3p, esi-miR3459-5p, ahy-miR3513-5p, ahy-miR3516, vvi-miR3627-5p, ath-miR5632-3p, osa-miR5337b, ptc-miR6440a, stu-miR166d-5p, gra-miR8672, gma-miR9752, ata-miR9863a-5p, ata-miR2275c-5p, ata-miR9863b-5p
GDCSH GCDH GCSH	24	mtr-miR171e-5p, ppt-miR1063a, ppt-miR1063b, ppt-miR1063c, ppt-miR1063d, ppt-miR1063e, ppt-miR1063f, ppt-miR1063g, ppt-miR1063h, mtr-miR2592a-5p, aly-miR399e-5p, mtr-miR2606c, gma-miR171k-5p, gma-miR171l, osa-miR5809, hme-miR-2a, hme-miR-2b, hme-miR-2c, ptc-miR6424, lja-miR171d-3p, bdi-miR7719-5p, bdi-miR7741-3p.1, gra-miR8724, tae-miR9678-3p
PSBR	24	ath-miR399a, mtr-miR399c, ptc-miR399j, ath-miR842, mtr-miR399h, mtr-miR399i, smo-miR1085-5p, vvi-miR399f, sbi-miR821a, sbi-miR821c, sbi-miR821e, ghr-miR399d, aly-miR399f-3p, aly-miR842-3p, tcc-miR399f, gma-miR5679, bna-miR399c, cca-miR399, hme-miR-306, gra-miR8710a, gra-miR8710b, gra-miR7486f, gra-miR7486g, gra-miR8769
COG4 At4g01395 F3D13.1	23	mtr-miR2592d-5p, mtr-miR2592e-5p, mtr-miR2592o-5p, mtr-miR2592q-5p, aly-miR774b-5p, bdi-miR5166, mtr-miR2592t, mtr-miR2592u, mtr-miR2592v, mtr-miR2592w, mtr-miR2592x, mtr-miR2592y, mtr-miR2592z, mtr-miR2592ab, mtr-miR2592ac, mtr-miR2592ad, mtr-miR2592ae, mtr-miR2592af, mtr-miR2592ah, mtr-miR2592ai, mtr-miR2592aj, mtr-miR2592al, mtr-miR2592am
RPS10 SOVF_026730	23	zma-miR156k-5p, sbi-miR156e, bna-miR156a, rco-miR156a, rco-miR156b, rco-miR156c, rco-miR156d, aly-miR838-5p, hvu-miR156a, tae-miR156, ssp-miR156, ssl-miR156, gma-miR5225, osa-miR5814, hbr-miR6172, ptc-miR6434, ghr-miR7499, bdi-miR7741-3p.1, gra-miR8653b, gra-miR7504k, gra-miR7504l, gra-miR7504m, hvu-miR156b
RPS10 SOVF_026730	23	osa-miR1861a, osa-miR1861d, ath-miR3933, mtr-miR2592ap, mtr-miR2592aq, mtr-miR2592ar, mtr-miR2592as, mtr-miR2592at, mtr-miR2592au, mtr-miR2592av, mtr-miR2592aw, mtr-miR2592ax, mtr-miR2592ay, mtr-miR2592az, mtr-miR2592ba, mtr-miR2592bb, mtr-miR2592bc, mtr-miR2592bd, mtr-miR2592be, mtr-miR2592bf, mtr-miR2592bg, bdi-miR159b-5p.3, osa-miR1861o
	23	osa-miR399i, sbi-miR399b, mtr-miR399b, zma-miR399d-3p, ptc-miR399h, mtr-miR399o, aqu-miR-2021-5p, bdi-miR399a, mtr-miR399q, rco-miR399d, gma-miR4998, ath-miR5016, bdi-miR395c-5p, bdi-miR395k-5p, hvu-miR6190, sbi-miR5568g-3p, stu-miR399a-3p, stu-miR399b-3p, stu-miR399c-3p, stu-miR399d-3p, stu-miR399e-3p, stu-miR399f-3p, ath-miR8177
AGD13 At4g05330 C6L9.10	23	ath-miR397a, osa-miR397a, ptc-miR397a, ptc-miR397b, ppt-miR1064-3p, vvi-miR397a, sbi-miR397-5p, bdi-miR397a, zma-miR397a-5p, zma-miR397b-5p, rco-miR397, aly-miR397a-5p, aly-miR397b-5p, aly-miR858-3p, csi-miR397, tcc-miR397, gma-miR397a, gma-miR397b-5p, ssl-miR397, dpr-miR397, bna-miR6031, cme-miR397, mtr-miR397-5p
AGD12 ZAC At4g21160 F7J7.100	23	ath-miR419, ptc-miR171a-5p, ppt-miR1220a, ppt-miR1220b, ath-miR824-5p, ath-miR864-5p, bol-miR824, bra-miR824, bna-miR824, vvi-miR395n, osa-miR2091-3p, mtr-miR2616, aly-miR824-5p, mtr-miR408-5p, gma-miR5770a, gma-miR5770b, mdm-miR7128, bdi-miR7738-5p, ptc-miR7831, stu-miR1886g-3p, stu-miR1886h, stu-miR1886i-3p, gma-miR9724
TOM3 At2g02180 F5O4.5	23	ath-miR172b-5p, ath-miR172e-5p, osa-miR172d-5p, zma-miR172d-5p, zma-miR172b-5p, zma-miR172c-5p, ppt-miR1220a, ppt-miR1220b, osa-miR395w, cre-miR914, gma-miR1535a, aly-miR172e-5p, aly-miR4229, pab-miR3707, bdi-miR172a-5p, gma-miR172g, cca-miR6109, hme-miR-13b, osa-miR1437b-5p, gra-miR7502e, bdi-miR9483a, bdi-miR9483b, ata-miR172b-5p
CM2 At5g10870 T30N20.140	23	ptc-miR480, ath-miR845b, mtr-miR169c, gma-miR1536, mtr-miR2665, ahy-miR3513-5p, ahy-miR3513-3p, ssp-miR437b, mtr-miR4414a-3p, mtr-miR5236a, mtr-miR5236b, mtr-miR5236c, mtr-miR5236d, mtr-miR5236e, mtr-miR5269a, gma-miR5368, gma-miR169n-5p, osa-miR5492, gma-miR5765, sbi-miR6218-5p, gra-miR7505b, gra-miR8713, bdi-miR9482
LCY1 CRTL	23	ppt-miR902h-5p, ppt-miR902i-5p, cre-miR1150.1, ptc-miR1447, gma-miR1520a, gma-miR1526, mtr-miR2119, aly-miR828-3p, gma-miR4371a, gma-miR4376-5p, gma-miR1520k, ath-miR3932a, ath-miR3932b-3p, osa-miR5150-3p, mtr-miR5292a, mtr-miR5292b, sly-miR4376, hvu-miR1130, ptc-miR6421-3p, ptc-miR828b-3p, stu-miR4376-5p, bol-miR9409, tae-miR9773
	23	ath-miR391-3p, ath-miR417, osa-miR821a, osa-miR821b, osa-miR821c, ppt-miR894, pta-miR952a, osa-miR1882a, osa-miR1882b, osa-miR1882c, osa-miR1882d, osa-miR1882e-5p, osa-miR1882f, osa-miR1882g, osa-miR1882h, ppt-miR2079, mtr-miR2631, aly-miR391-3p, bdi-miR5181b, osa-miR5508, gra-miR399, bol-miR9408, bra-miR391-3p
	23	osa-miR530-5p, ppt-miR1030i, ppt-miR1030j, aly-miR169m-3p, aly-miR862-3p, aly-miR3441-3p.2, gma-miR4385, ath-miR5014a-3p, osa-miR5083, osa-miR5525, osa-miR5543, bra-miR5723, cca-miR6116-3p, ptc-miR482d-5p, ptc-miR6452, sbi-miR5564c-3p, ghr-miR7486a, ghr-miR7486b, bdi-miR7725a-5p, stu-miR7980b-3p, bdi-miR530a, bdi-miR530b, gra-miR827b
	23	osa-miR530-5p, ppt-miR1030i, ppt-miR1030j, aly-miR169m-3p, aly-miR862-3p, aly-miR3441-3p.2, gma-miR4385, osa-miR5083, osa-miR5525, osa-miR5543, mtr-miR5558-3p, bra-miR5723, cca-miR6116-3p, ptc-miR482d-5p, ptc-miR6452, sbi-miR5564c-3p, ghr-miR7486a, ghr-miR7486b, bdi-miR7725a-5p, stu-miR7980b-3p, bdi-miR530a, bdi-miR530b, gra-miR827b
	23	osa-miR1428e-5p, osa-miR1428f-5p, osa-miR1428g-5p, aly-miR399f-5p, gma-miR4404, hvu-miR5051, bdi-miR5185a-3p, bdi-miR5185b-3p, ath-miR5647, hme-miR-2796, bdi-miR5185c-3p, bdi-miR5185d-3p, bdi-miR5185e-3p, bdi-miR5185f-3p, bdi-miR5185g-3p, bdi-miR5185h-3p, bdi-miR5185i-3p, bdi-miR5185j-3p, bdi-miR5185k-3p, bdi-miR5185m-3p, gra-miR8753, gra-miR8771d, gra-miR8763
At2g44860 T13E15.13	23	osa-miR156b-3p, gma-miR172b-5p, cre-miR1170.1, pta-miR1311, mtr-miR2663, aly-miR172a-5p, pab-miR1311, bdi-miR5165-5p, mtr-miR172c-5p, gma-miR5373, stu-miR6026-3p, stu-miR6026-3p, sly-miR6026, sly-miR6026, cca-miR6110-3p, hme-miR-13a, pde-miR1311, sbi-miR6233-3p, ptc-miR7841, stu-miR172e-5p, gra-miR172a, gra-miR172b, bra-miR172d-5p
At5g23290 MKD15.15	23	ath-miR161.1, smo-miR1107, cre-miR1142, vvi-miR169i, aly-miR161-5p.1, aly-miR846-5p, osa-miR3981-3p, gma-miR5042-3p, osa-miR5144-3p, mtr-miR5248, gma-miR169j-3p, osa-miR5526, hme-miR-9a, mtr-miR7696c-3p, mtr-miR7696d-3p, rgl-miR7798, rgl-miR7807b-3p, stu-miR8001b-5p, gra-miR7502b, gra-miR7502c, gra-miR7504g, gra-miR8749, sly-miR9470-3p
GLYI-11 GLX-I Os08g0191700 LOC_Os08g09250 OSJNBa0056O06.9-1	23	ppt-miR533b-3p, ath-miR829-3p.2, pvu-miR1514a, ath-miR2933a, ath-miR2933b, bdi-miR169i, gma-miR169j-5p, gma-miR169k, gma-miR169l-5p, hbr-miR396a, ptc-miR6466-3p, ptc-miR6468-5p, ptc-miR6472, sbi-miR6231-5p, mes-miR169l, mes-miR169m, cpa-miR169, ath-miR8171, gra-miR8669, gra-miR7494e, gra-miR7494f, gra-miR8761, sly-miR9473-5p
At1g67280 F1N21.10	23	ppt-miR533b-3p, ath-miR829-3p.2, pvu-miR1514a, ath-miR2933a, ath-miR2933b, bdi-miR169i, gma-miR169j-5p, gma-miR169k, gma-miR169l-5p, hbr-miR396a, ptc-miR6466-3p, ptc-miR6468-5p, ptc-miR6472, sbi-miR6231-5p, mes-miR169l, mes-miR169m, cpa-miR169, ath-miR8171, gra-miR8669, gra-miR7494e, gra-miR7494f, gra-miR8761, sly-miR9473-5p
RPL37C At3g16080 MSL1.12	23	zma-miR168a-3p, ppt-miR1223b, ppt-miR1223c, ppt-miR1223d, ppt-miR1223e, ppt-miR1223f, ppt-miR1223g, ppt-miR1223h, ppt-miR1223i, ppt-miR1223j, mtr-miR2676a, mtr-miR2676b, mtr-miR2676c, mtr-miR2676d, mtr-miR2676e, mtr-miR2676f, zma-miR1432-3p, ahy-miR3516, bdi-miR168-3p, osa-miR5831, ptc-miR7842, bra-miR9556-3p, ata-miR168-3p
SIRB At1g50170 F14I3.20	23	ath-miR157a-3p, ath-miR157b-3p, ppt-miR1066, aqu-miR-2018-3p, bdi-miR1122, aly-miR773b-5p, bdi-miR172a-5p, mtr-miR172c-5p, sly-miR5302a, stu-miR482b-3p, hme-miR-6305-3p, hme-miR-6306-3p, ddi-miR-7099, ddi-miR-7103, mtr-miR7701-5p, stu-miR8036-3p, stu-miR8047, stu-miR172e-5p, gra-miR172b, gra-miR8744, gra-miR8785, gma-miR9766, ata-miR172b-5p
SIRB At1g50170 F14I3.20	23	ath-miR827, ghr-miR156c, osa-miR2927, ghr-miR827a, ghr-miR827b, ghr-miR827c, aly-miR827-3p, aly-miR869-5p, esi-miR3468-5p, aly-miR4222, gma-miR4387a, csi-miR827, tcc-miR827, mtr-miR5283, osa-miR5500, nta-miR827, ddi-miR-7099, mes-miR827, osa-miR7694-3p, bdi-miR7719-5p, stu-miR827-3p, gra-miR8735, gra-miR7502f
SIRB At1g50170 F14I3.20	23	ath-miR394b-3p, zma-miR159b-5p, ptc-miR478d, osa-miR1432-3p, gma-miR1508a, gma-miR1508b, aqc-miR167, zma-miR159j-5p, zma-miR159k-5p, aly-miR394a-3p, gso-miR1508a, gma-miR1508c, osa-miR5523, cme-miR167e, bdi-miR7717b-3p, bdi-miR7724a-3p, bdi-miR7724b-3p, ptc-miR7825, ptc-miR7840, stu-miR8005a, stu-miR8005b-3p, stu-miR8005c, ata-miR394-3p
SULTR3;4 At3g15990 MSL1.3	22	mtr-miR2592d-5p, mtr-miR2592e-5p, mtr-miR2592o-5p, mtr-miR2592q-5p, mtr-miR2592t, mtr-miR2592u, mtr-miR2592v, mtr-miR2592w, mtr-miR2592x, mtr-miR2592y, mtr-miR2592z, mtr-miR2592ab, mtr-miR2592ac, mtr-miR2592ad, mtr-miR2592ae, mtr-miR2592af, mtr-miR2592ah, mtr-miR2592ai, mtr-miR2592aj, mtr-miR2592al, mtr-miR2592am, stu-miR8051-5p
PI21 OsI_15741 OSIGBa0113L04.7 OSIGBa0155K12.2	22	zma-miR399c-5p, osa-miR2102-3p, ath-miR2111b-3p, mtr-miR2592ap, mtr-miR2592aq, mtr-miR2592ar, mtr-miR2592as, mtr-miR2592at, mtr-miR2592au, mtr-miR2592av, mtr-miR2592aw, mtr-miR2592ax, mtr-miR2592ay, mtr-miR2592az, mtr-miR2592ba, mtr-miR2592bb, mtr-miR2592bc, mtr-miR2592bd, mtr-miR2592be, mtr-miR2592bf, mtr-miR2592bg, ath-miR8169
At4g01037 A_IG002N01.30	22	osa-miR166b-5p, ath-miR398b-5p, ath-miR398c-5p, zma-miR166a-5p, zma-miR166k-5p, ppt-miR898a-3p, pta-miR482a, pta-miR482b, smo-miR1104, csi-miR172a-5p, aly-miR398b-5p, aly-miR398c-5p, aly-miR399b-5p, pab-miR482a, bdi-miR166b-5p, mdm-miR5225c, lja-miR7524, bdi-miR7707-5p, stu-miR172c-5p, bra-miR398-5p, ata-miR166d-5p, ata-miR399a-5p
SG1 At3g18420 MYF24.13	22	osa-miR167e-3p, osa-miR167e-3p, osa-miR167i-3p, osa-miR167i-3p, zma-miR319a-5p, zma-miR319c-5p, zma-miR167h-3p, zma-miR167h-3p, zma-miR167i-3p, zma-miR167i-3p, ptc-miR167f-3p, ptc-miR167g-3p, ptc-miR167h-3p, ppt-miR319d-5p.1, ath-miR782, ahy-miR167-3p, bdi-miR167d-3p, bdi-miR167d-3p, mtr-miR167b-3p, gra-miR167a, gra-miR167b, ata-miR167f-3p
At5g22580 MQJ16.12	22	osa-miR443, zma-miR167f-3p, osa-miR2275a, osa-miR2275b, zma-miR2275a-3p, zma-miR2275b-3p, zma-miR2275c-3p, zma-miR2275d-3p, hvu-miR171-5p, bdi-miR171d-5p, nta-miR6153, mes-miR2275, stu-miR7993b-5p, ath-miR8165, bdi-miR2275a, bdi-miR2275b, bdi-miR2275c, tae-miR2275-3p, ata-miR2275a-3p, ata-miR2275b-3p, ata-miR2275c-3p, ata-miR171d-5p
HS1 At3g17210 MGD8.2	22	mtr-miR171a, ppt-miR1221-3p, ppt-miR1041, gma-miR1511, osa-miR2097-3p, mtr-miR2659a, mtr-miR2659b, mtr-miR2659c, mtr-miR2659d, mtr-miR2659e, mtr-miR2659f, osa-miR5492, mtr-miR5561-3p, gma-miR396j, mtr-miR2659g, mtr-miR2659h, mtr-miR2659i, mtr-miR2659j, mtr-miR2659k, gra-miR8712, gra-miR8757a, gra-miR8757b
PFK3 At4g26270 T25K17.80	22	ptc-miR473a-5p, ptc-miR473b, ppt-miR477c, ppt-miR477a-5p, ppt-miR477d, ppt-miR477e, ppt-miR477h, ppt-miR477b, vvi-miR477a, aqc-miR477e, aqc-miR477a, aqc-miR477b, aly-miR160c-3p, ahy-miR3520-3p, csi-miR477c, cme-miR477b, ghr-miR7504b, mes-miR477i, mes-miR477f, mes-miR477g, bdi-miR7774-3p, stu-miR477b-5p
RNP1 At4g14300 dl3190w FCAALL.156	22	sbi-miR169d-5p, osa-miR438, ptc-miR169o, mtr-miR169f, vvi-miR169y, vvi-miR169t, osa-miR1426, gma-miR4377, mtr-miR5217, cca-miR169a, nta-miR169t, cme-miR169k, stu-miR8046-5p, stu-miR169a-5p, stu-miR169b-5p, stu-miR169c-5p, stu-miR169d-5p, stu-miR169e-5p, stu-miR169f-5p, stu-miR169g, stu-miR169h, sly-miR169e-5p
At2g18990 F19F24.19	22	ppt-miR535a, ppt-miR535b, ppt-miR535c, osa-miR535-5p, ppt-miR535d, ppt-miR529g, ppt-miR529g, ppt-miR1041, vvi-miR535a, vvi-miR535b, vvi-miR535c, aqc-miR535, rco-miR535, pab-miR535, csi-miR535, hme-miR-12, mdm-miR535a, mdm-miR535d, mes-miR535a, mes-miR535b, cpa-miR535, bra-miR9555a-3p
CPK3 Os01g0832300 LOC_Os01g61590 OsJ_03967 P0460C04.4	22	osa-miR393b-3p, zma-miR167c-3p, zma-miR393a-3p, ath-miR855, gma-miR1507a, gma-miR1507b, vun-miR1507a, vun-miR1507b, sbi-miR397-3p, zma-miR393c-3p, gso-miR1507a, gso-miR1507b, pab-miR482d, gma-miR4376a-3p, csi-miR535, gma-miR319d, gma-miR1507c-3p, bdi-miR393b-3p, gma-miR319i, bra-miR5725, gma-miR319o, ata-miR393-3p
CPK1 Os01g0622600 LOC_Os01g43410 OsJ_02652 P0501G01.10	22	ath-miR396a-3p, ath-miR396b-3p, osa-miR396a-3p, osa-miR396b-3p, gma-miR396a-3p, zma-miR396b-3p, zma-miR396a-3p, mtr-miR396b-3p, mtr-miR2592b-5p, mtr-miR2592s-5p, aly-miR396a-3p, aly-miR396b-3p, bdi-miR396d-3p, bdi-miR396c-3p, gma-miR396i-3p, stu-miR396-3p, gra-miR7494e, gra-miR7494f, sly-miR396a-3p, bra-miR396-3p, tae-miR9653b, ata-miR396e-3p
PCMP-H77 At3g49142 F2K15.2 T2J13.20	22	ppt-miR1058, pta-miR1316, mtr-miR2659a, mtr-miR2659b, mtr-miR2659c, mtr-miR2659d, mtr-miR2659e, mtr-miR2659f, aly-miR774b-3p, vvi-miR3630-5p, mtr-miR5269a, gma-miR5037b, osa-miR5533, mtr-miR5558-5p, hme-miR-137, mtr-miR2659g, mtr-miR2659h, mtr-miR2659i, mtr-miR2659j, mtr-miR2659k, stu-miR8007a-3p, ata-miR2275b-3p
NFYC6 HAP5D Os08g0496500 LOC_Os08g38780 B1142B04.32 P0026F07.3	22	ath-miR170-3p, ppt-miR1038-3p, osa-miR2105, mtr-miR2606a, mtr-miR2606b, mtr-miR2659a, mtr-miR2659b, mtr-miR2659c, mtr-miR2659d, mtr-miR2659e, mtr-miR2659f, mtr-miR2663, aly-miR170-3p, gma-miR4414-5p, mtr-miR4414a-5p, mtr-miR2659g, mtr-miR2659h, mtr-miR2659i, mtr-miR2659j, mtr-miR2659k, stu-miR171c-3p, tae-miR9664-3p
SGR OsI_32148	22	ath-miR166a-5p, ath-miR166b-5p, ath-miR172b-5p, ath-miR172e-5p, osa-miR172d-5p, zma-miR172d-5p, zma-miR172b-5p, zma-miR172c-5p, ptc-miR172h-5p, bra-miR172b-5p, aly-miR166b-5p, aly-miR172b-5p, aly-miR172e-5p, bdi-miR172a-5p, mtr-miR172c-5p, gma-miR172g, stu-miR172b-5p, gra-miR172a, gra-miR172b, bra-miR172d-5p, ata-miR172a-5p, ata-miR172b-5p
ADIPOR3 Os03g0232900 LOC_Os03g13040 OJ1175C11.13	22	ath-miR418, osa-miR418, ath-miR851-3p, ppt-miR1056, gma-miR1526, mtr-miR1507-5p, osa-miR2093-5p, sbi-miR1435a, sbi-miR1435b, mtr-miR2607, aly-miR851-3p, ahy-miR3513-5p, ahy-miR3516, vvi-miR3627-5p, ath-miR5632-3p, osa-miR5337b, ptc-miR6440a, gra-miR8672, gma-miR9752, ata-miR9863a-5p, ata-miR2275c-5p, ata-miR9863b-5p
5GT	22	mtr-miR169d-5p, smo-miR1082a, smo-miR1082b, cre-miR1147.1, gma-miR169c, vvi-miR169b, vvi-miR169h, vvi-miR169l, mtr-miR169k, zma-miR398a-3p, zma-miR398b-3p, sbi-miR398, tae-miR398, gma-miR5041-3p, ath-miR5636, gma-miR169o, gma-miR169r, gma-miR169s, gma-miR169u, osa-miR5792, ata-miR398f-3p, ata-miR398g-3p
SRF6 At1g53730 F22G10.3 F22G10.31	22	osa-miR1428e-5p, osa-miR1428f-5p, osa-miR1428g-5p, aly-miR399f-5p, gma-miR4404, hvu-miR5051, bdi-miR5185a-3p, bdi-miR5185b-3p, ath-miR5647, hme-miR-2796, bdi-miR5185c-3p, bdi-miR5185d-3p, bdi-miR5185e-3p, bdi-miR5185f-3p, bdi-miR5185g-3p, bdi-miR5185h-3p, bdi-miR5185i-3p, bdi-miR5185j-3p, bdi-miR5185k-3p, bdi-miR5185m-3p, gra-miR8771d, gra-miR8763
CEST Os01g0798500 LOC_Os01g58470 OsJ_03754 P0691E06.11-1	22	osa-miR1428e-5p, osa-miR1428f-5p, osa-miR1428g-5p, aly-miR399f-5p, gma-miR4404, hvu-miR5051, bdi-miR5185a-3p, bdi-miR5185b-3p, ath-miR5647, hme-miR-2796, bdi-miR5185c-3p, bdi-miR5185d-3p, bdi-miR5185e-3p, bdi-miR5185f-3p, bdi-miR5185g-3p, bdi-miR5185h-3p, bdi-miR5185i-3p, bdi-miR5185j-3p, bdi-miR5185k-3p, bdi-miR5185m-3p, gra-miR8771d, gra-miR8763
	22	pta-miR1311, mdm-miR482a-5p, aly-miR169h-3p, aly-miR169j-3p, aly-miR169k-3p, aly-miR169l-3p, pab-miR1311, gma-miR4399, bdi-miR169e-3p, mtr-miR2592bi, mtr-miR2592bj, mtr-miR2592bk, ath-miR5637, nta-miR6020b, hme-miR-6310-3p, pde-miR1311, bdi-miR7745-3p, bdi-miR7752-3p, stu-miR8039, stu-miR319-3p, gra-miR8642, ata-miR169i-3p
At1g16860 F6I1.14	22	ath-miR829-3p.1, ath-miR845a, sbi-miR821a, sbi-miR821c, aly-miR845b-3p, aly-miR773b-5p, esi-miR3465-5p, mtr-miR5229a, mtr-miR5229b, ptc-miR6462a, ptc-miR6462b, ptc-miR6462c-3p, ptc-miR6462d, bdi-miR7751-3p, stu-miR7997c, gra-miR8746, gra-miR8768, gra-miR7504k, gra-miR7504l, gra-miR7504m, bdi-miR845, tae-miR9781
BTR1 At5g04430 T32M21_30	22	ath-miR414, osa-miR414, osa-miR528-5p, cre-miR1153-5p.1, zma-miR528a-5p, zma-miR528b-5p, sbi-miR528, bdi-miR528-5p, ssp-miR528, mtr-miR5240, ath-miR5635a, ath-miR5635d, ath-miR5635b, ath-miR5635c, hbr-miR6484, gra-miR8655, bdi-miR5200a-3p, bdi-miR5200b-3p, tae-miR9657b-5p, tae-miR5200, ata-miR5200-3p, ata-miR528-5p
BTR1 At5g04430 T32M21_30	22	ppt-miR1036-3p, smo-miR1088-5p, cre-miR1164, gma-miR390b-5p, gma-miR390b-5p, zma-miR397b-3p, ahy-miR3508, aly-miR4233, ath-miR4228-3p, mtr-miR5746, nta-miR390a, nta-miR390a, gma-miR390d, gma-miR390d, gma-miR390e, gma-miR390e, ptc-miR6471, bdi-miR7711-5p.2, stu-miR390-5p, stu-miR390-5p, sly-miR390a-5p, sly-miR390a-5p
CRCK2 At4g00330 A_IG005I10.8 F5I10.8	22	ath-miR837-3p, smo-miR1112-5p, smo-miR1103-3p, gma-miR1527, osa-miR2105, osa-miR2875, aly-miR859-5p, aly-miR837-3p, aly-miR3436-5p, vvi-miR3624-3p, csi-miR3951, mtr-miR5205a, ath-miR5628, mtr-miR2593e, mtr-miR2593d, mtr-miR7701-3p, stu-miR8040-5p, stu-miR156g-3p, gra-miR8650, gra-miR7484e, sly-miR156e-3p, tae-miR9656-3p
Os03g0743400 LOC_Os03g53190 OJ1365_D05.1 OsJ_12526 OSJNBb0036F07.3	21	ath-miR396a-3p, osa-miR396a-3p, osa-miR396b-3p, osa-miR396c-3p, gma-miR396a-3p, zma-miR396b-3p, zma-miR396a-3p, mtr-miR396b-3p, zma-miR396f-3p, osa-miR2925, aly-miR396a-3p, gma-miR4354, bdi-miR396d-3p, bdi-miR396c-3p, bdi-miR396e-3p, gma-miR396i-3p, cca-miR396a-3p, cca-miR396c, sly-miR396a-3p, ata-miR396e-3p, ata-miR396c-3p
SR45A TRA2 At1g07350 F22G5.31	21	ath-miR396a-3p, osa-miR396a-3p, osa-miR396b-3p, osa-miR396c-3p, gma-miR396a-3p, zma-miR396b-3p, zma-miR396a-3p, ppt-miR1215, mtr-miR396b-3p, zma-miR396f-3p, aly-miR396a-3p, gma-miR4354, bdi-miR396d-3p, bdi-miR396c-3p, bdi-miR396e-3p, gma-miR396i-3p, cca-miR396a-3p, cca-miR396c, sly-miR396a-3p, ata-miR396e-3p, ata-miR396c-3p
SR45A TRA2 At1g07350 F22G5.31	21	osa-miR5509, hme-miR-2765, ptc-miR6460, ptc-miR7837, ptc-miR7836, stu-miR399a-5p, stu-miR399b-5p, stu-miR399c-5p, stu-miR399d-5p, stu-miR399e-5p, stu-miR399f-5p, stu-miR399g-5p, stu-miR399h, stu-miR166d-5p, stu-miR399k-5p, stu-miR399l-5p, stu-miR399m-5p, stu-miR399n-5p, stu-miR399o-5p, tae-miR531, ata-miR2275a-5p
At3g51990 F4F15.100	21	ath-miR157d, ath-miR169a-3p, ptc-miR396g-5p, aqc-miR156b, aqc-miR156a, aly-miR157d-5p, pab-miR396b, pab-miR396c, tcc-miR396d, bdi-miR5059, ath-miR5014b, nta-miR156g, nta-miR156h, nta-miR156i, nta-miR156j, mdm-miR156x, mdm-miR156y, mdm-miR156z, mdm-miR156aa, cme-miR156f, stu-miR7990a
PIP At2g14260 T1O16.15	21	ath-miR395b, ath-miR395c, ath-miR395f, zma-miR159b-5p, ppt-miR1042-5p, mtr-miR2639, zma-miR159g-5p, zma-miR159h-5p, zma-miR159i-5p, zma-miR159j-5p, zma-miR159k-5p, aly-miR395b-3p, aly-miR395f-3p, aly-miR395h-3p, mtr-miR5290, mtr-miR5755, bna-miR395d, bna-miR395e, bna-miR395f, ddi-miR-7104, bdi-miR7757-3p.1
WRKY65 At1g29280 F28N24.4	21	ath-miR396a-3p, osa-miR396a-3p, osa-miR396b-3p, gma-miR396a-3p, zma-miR396b-3p, zma-miR396a-3p, mtr-miR396b-3p, aly-miR396a-3p, gma-miR156g, bdi-miR396d-3p, bdi-miR396c-3p, bdi-miR5200c, gma-miR396i-3p, nta-miR6144, bdi-miR7733-5p, gra-miR8743c, gra-miR8743d, gra-miR8743e, gra-miR8743a, sly-miR396a-3p, ata-miR396e-3p
GID8 At1g61150 F11P17.12	21	ath-miR160c-3p, zma-miR164d-3p, ath-miR779.2, ppt-miR1041, gma-miR390a-3p, osa-miR2918, aly-miR839-3p, aly-miR773b-5p, aly-miR4225, gma-miR390c, gma-miR5038a, gma-miR5038b, hme-bantam, ghr-miR7503, mes-miR390, bdi-miR7717c-3p, bdi-miR7754-5p, stu-miR8046-5p, cpa-miR8151, gra-miR8732, bra-miR6032-5p
RANBPM At1g35470 F12A4.1	21	mtr-miR319b-5p, ppt-miR1068, gma-miR1531-3p, peu-miR2913, bdi-miR5185a-3p, bdi-miR5185b-3p, lja-miR7523a, lja-miR7523b, bdi-miR5185c-3p, bdi-miR5185d-3p, bdi-miR5185e-3p, bdi-miR5185f-3p, bdi-miR5185g-3p, bdi-miR5185h-3p, bdi-miR5185i-3p, bdi-miR5185j-3p, bdi-miR5185k-3p, bdi-miR7743-3p, stu-miR477b-3p, sly-miR9469-3p, bdi-miR9485
At5g13200 T19L5.4 T31B5_20	21	ptc-miR394a-3p, ptc-miR394b-3p, ptc-miR473b, ath-miR834, ath-miR837-5p, mtr-miR156g-5p, ppt-miR408a, smo-miR156d, mtr-miR2615a, mtr-miR2615b, mtr-miR2615c, aly-miR834-3p, gma-miR408d, mtr-miR5205c, mtr-miR5205d, osa-miR5815, cme-miR156e, sbi-miR5568c-3p, sbi-miR6220-3p, sly-miR9479-5p, ata-miR408-3p
PCMP-H11 At1g31920 F5M6.8	21	ppt-miR535a, ppt-miR535b, ppt-miR535c, osa-miR535-5p, ppt-miR535d, ppt-miR529g, ppt-miR1041, vvi-miR535a, vvi-miR535b, vvi-miR535c, aqc-miR535, rco-miR535, pab-miR535, csi-miR535, hme-miR-12, mdm-miR535a, mdm-miR535d, mes-miR535a, mes-miR535b, cpa-miR535, bra-miR9555a-3p
DHAPS-1	21	ath-miR390a-3p, ath-miR390b-3p, osa-miR390-3p, ptc-miR390d-3p, gma-miR390a-3p, zma-miR390a-3p, zma-miR390b-3p, aly-miR319c-5p, aly-miR390a-3p, aly-miR390b-3p, aly-miR319d-5p, gma-miR390c, bdi-miR390a-3p, sbi-miR437x-3p, mes-miR390, lja-miR390a-3p, lja-miR390b-3p, sly-miR390a-3p, sly-miR390b-3p, bra-miR390-3p, ata-miR390-3p
At3g04780 F7O18.27 T9J14.27	21	ath-miR398b-5p, ath-miR398c-5p, smo-miR156d, osa-miR1435, osa-miR1846e, sbi-miR1435a, aly-miR398b-5p, gma-miR1520f-3p, bgy-miR156, bcy-miR156, mtr-miR2592bm-3p, mtr-miR2592bn-3p, gma-miR156q, gma-miR156s, hme-miR-79, ddi-miR-7095-3p, bdi-miR7724a-3p, bdi-miR7724b-3p, stu-miR398a-5p, gra-miR8647, tae-miR9675-3p
PTAC14 PAP7 TAC14 At4g20130 F18F4 F1C12.4	21	gma-miR390b-5p, sbi-miR1432, zma-miR2275a-3p, zma-miR2275b-3p, zma-miR2275c-3p, zma-miR2275d-3p, zma-miR1432-5p, aly-miR395e-5p, aly-miR395g-5p, ssp-miR1432, bdi-miR395j-5p, nta-miR390a, gma-miR390d, gma-miR390e, stu-miR3627-5p, stu-miR390-5p, sly-miR390a-5p, bra-miR395d-5p, bra-miR395b-5p, bra-miR395c-5p, bra-miR395a-5p
PMAT2 At3g29670 MOD1_4	21	smo-miR1098, bna-miR167a, bna-miR167b, ccl-miR167a, ctr-miR167, ccl-miR167b, gma-miR167g, bdi-miR167c-5p, bdi-miR167d-5p, mes-miR167d, mes-miR167e, mes-miR167f, bdi-miR167e-5p, stu-miR8038a-3p, stu-miR8038b-3p, cpa-miR167d, gra-miR8709c, bdi-miR167g, gma-miR5780b, ata-miR167b-5p, ata-miR167d-5p
LIP1 At5g64813 MXK3.3	21	ath-miR398b-3p, ath-miR398c-3p, ath-miR773a, ath-miR779.2, bol-miR398a-5p, aly-miR398a-5p, aly-miR398b-3p, aly-miR3442-5p, ahy-miR3509-5p, ath-miR4239, gma-miR319f, mtr-miR5299, bdi-miR7755-3p, bdi-miR7765-5p, bdi-miR7776-5p.2, stu-miR8043, stu-miR8043, stu-miR398b-3p, hbr-miR9387, bra-miR398-3p, gma-miR9746i
CESA3 ATHB CEV1 ELI1 IXR1 RSW5 At5g05170 K2A11.4	21	mtr-miR169c, ppt-miR1223b, ppt-miR1223c, ppt-miR1223d, ppt-miR1223j, ppt-miR1070, pab-miR3696, gma-miR4384, bdi-miR5064, rgl-miR5137, bdi-miR5169a, gma-miR169n-5p, osa-miR5542, bna-miR6032, ptc-miR6465, pde-miR169, mdm-miR7124a, mdm-miR7124b, cme-miR399f, bdi-miR5169b, tae-miR9774
CESA6 Os07g0252400 LOC_Os07g14850 OsJ_23733 P0669H03.13	21	mtr-miR169c, ppt-miR1223b, ppt-miR1223c, ppt-miR1223d, ppt-miR1223j, ppt-miR1070, pab-miR3696, gma-miR4384, bdi-miR5064, bdi-miR5169a, gma-miR169n-5p, osa-miR5542, bna-miR6032, ptc-miR6465, pde-miR169, mdm-miR7124a, mdm-miR7124b, mdm-miR319c, cme-miR399f, bdi-miR5169b, tae-miR9774
SYP71 At3g09740 F11F8_33	21	osa-miR820a, osa-miR820b, osa-miR820c, ppt-miR900-5p, mtr-miR2676a, mtr-miR2676b, mtr-miR2676c, mtr-miR2676d, mtr-miR2676e, mtr-miR2676f, aly-miR773b-5p, gma-miR393h, gma-miR393i, gma-miR393j, gma-miR393k, osa-miR7693-5p, bdi-miR7767-5p, bdi-miR7772-5p, stu-miR8048-3p, gma-miR9735, ata-miR393-5p
BBX24 STO At1g06040 T21E18.8 T21E18.9	21	ptc-miR172b-5p, ptc-miR172g-5p, aly-miR172c-5p, aly-miR3435-5p, mtr-miR2600b, mtr-miR2600c, mtr-miR2600d, mtr-miR2600e, pti-miR5474, osa-miR5511, osa-miR5528, gma-miR5037d, bra-miR5725, osa-miR5793, bdi-miR166i-5p, bdi-miR7765-5p, stu-miR172d-5p, aly-miR172f-5p, gra-miR172a, gra-miR172b, tae-miR9664-3p
BBX24 STO At1g06040 T21E18.8 T21E18.9	21	ath-miR779.2, ppt-miR1079-3p, smo-miR1099, aly-miR4237, csi-miR396c, ath-miR5017-3p, bdi-miR5199, mtr-miR2606c, mtr-miR5558-3p, cca-miR6104, ptc-miR7829, stu-miR8040-3p, gra-miR8639a, gra-miR8639b, gra-miR8639c, gra-miR8639f, gra-miR8639g, gra-miR8639h, gra-miR8639i, gra-miR8639d, gra-miR8639e
TBL3 At5g01360 T10O8.70	21	ptc-miR477a-5p, ptc-miR477b, ath-miR472-5p, ppt-miR477c, ppt-miR477a-5p, ppt-miR477d, ppt-miR477e, ppt-miR477h, ppt-miR477b, vvi-miR477a, osa-miR2118e, osa-miR2118o, osa-miR2118r, ghr-miR2949b, ghr-miR2949c, aly-miR472-5p, sbi-miR6221-3p, sbi-miR6232a-3p, mes-miR477f, mes-miR477g, gra-miR8678
OEP37 At2g43950 F6E13.8	21	ath-miR160c-3p, osa-miR160a-3p, osa-miR160b-3p, ath-miR398b-5p, ath-miR398c-5p, zma-miR160b-3p, ptc-miR169aa, aqc-miR168, zma-miR160g-3p, zma-miR398a-5p, aly-miR160c-3p, gma-miR4410, bdi-miR160b-3p, bdi-miR160c-3p, pti-miR5475, hme-miR-133, sbi-miR6233-3p, ghr-miR7503, gra-miR7484j, bra-miR9556-5p, ata-miR160c-3p
OEP37	21	mtr-miR2604, mtr-miR2673a, mtr-miR2673b, esi-miR3453-3p, ahy-miR3511-3p, bdi-miR5185a-3p, bdi-miR5185b-3p, mtr-miR5554a-5p, mtr-miR5554b-5p, mtr-miR5554c-5p, bdi-miR5185c-3p, bdi-miR5185d-3p, bdi-miR5185e-3p, bdi-miR5185f-3p, bdi-miR5185g-3p, bdi-miR5185h-3p, bdi-miR5185i-3p, bdi-miR5185j-3p, bdi-miR5185k-3p, bdi-miR5185m-3p, gra-miR8700
SAE1A SAE1-1 At4g24940 F13M23.80	21	ath-miR170-5p, ath-miR171a-5p, osa-miR171e-5p, zma-miR171d-5p, zma-miR171e-5p, smo-miR1112-5p, aly-miR170-5p, aly-miR171a-5p, mtr-miR5241a, mtr-miR5241b, mtr-miR5241c, gma-miR171j-5p, hme-miR-10, pde-miR3704a, pde-miR3704b, ddi-miR-7100, bdi-miR7744-5p, stu-miR171b-5p, stu-miR171a-5p, stu-miR171c-5p, bra-miR158-5p
RPT3 BIM409 At5g58290 MCK7.16	21	ath-miR159c, osa-miR159e, sof-miR159c, zma-miR159c-3p, zma-miR159d-3p, sbi-miR159b, ptc-miR159d, pta-miR159c, smo-miR159, osa-miR2869, aly-miR159c-3p, ath-miR5012, ath-miR5025, cca-miR6111-5p, mdm-miR159a, mdm-miR159b, cme-miR159b, stu-miR7984a, stu-miR7984b-5p, cpa-miR159b, esi-miR8631
CLPR2 NCLPP2 At1g12410 F5O11.13	21	aqu-miR-2017-5p, mtr-miR2651, ccl-miR167a, ctr-miR167, ccl-miR167b, vvi-miR3633a-5p, gma-miR167g, bdi-miR167c-5p, bdi-miR167d-5p, gma-miR5776, hbr-miR482a, mes-miR167d, mes-miR167e, mes-miR167f, bdi-miR167e-5p, stu-miR7985, cpa-miR167d, sly-miR167b-5p, bdi-miR167g, ata-miR167b-5p, ata-miR167d-5p
HSP81-1 HSP82 OsI_028744	21	ptc-miR476b, osa-miR810a, ath-miR841a-5p, ath-miR865-5p, cre-miR906-5p, bna-miR167a, bna-miR167b, osa-miR1425-5p, mtr-miR1507-3p, osa-miR2118a, gma-miR4371a, bdi-miR5172-3p, cca-miR6104, hme-miR-279c, ddi-miR-7101, mdm-miR7124a, mdm-miR7124b, lja-miR7535, stu-miR7986, gra-miR8729, tae-miR530
HSP81-1 HSP82 OsI_028744	21	ath-miR2933a, ath-miR2933b, esi-miR3460-5p, bdi-miR5185a-5p, bdi-miR5185b-5p, mtr-miR5237, mtr-miR5237, gma-miR169j-3p, gma-miR5773, gma-miR5773, sbi-miR6231-5p, bdi-miR5185c-5p, bdi-miR5185d-5p, bdi-miR5185e-5p, bdi-miR5185f-5p, bdi-miR5185g-5p, bdi-miR5185h-5p, bdi-miR5185i-5p, bdi-miR5185j-5p, bdi-miR5185k-5p, bdi-miR5185m-5p
LLG1 At5g56170 MDA7.23	21	ppt-miR1030h, ppt-miR1030i, gma-miR4365, csi-miR1515, lja-miR7526a, lja-miR7526b, lja-miR7526c, lja-miR7526d, lja-miR7526e, lja-miR7526f, lja-miR7526g, lja-miR7526h, gra-miR8677, gma-miR9746a, gma-miR9746b, gma-miR9746c, gma-miR9746d, gma-miR9746e, gma-miR9746f, gma-miR9746g, gma-miR9746h
PCMP-H73 ECB2 VAC1 At1g15510 T16N11.2	21	ptc-miR481a, ptc-miR481b, ptc-miR481c, ptc-miR481d, mtr-miR2655a, mtr-miR2655c, mtr-miR2655d, mtr-miR2655e, mtr-miR2655f, mtr-miR2655g, mtr-miR2655h, mtr-miR2655i, mtr-miR2655j, mtr-miR2655k, mtr-miR2655l, mtr-miR2655m, mtr-miR2655n, mtr-miR2655o, mtr-miR2592bm-5p, mtr-miR2592bn-5p, ata-miR5070-5p
HSFC1A HSF02 HSF13 Os01g0625300 LOC_Os01g43590 OsJ_002575 OsJ_02668 P0006C01.11	21	ath-miR414, ath-miR414, ath-miR414, osa-miR414, osa-miR414, osa-miR414, zma-miR167g-3p, ppt-miR414, ppt-miR414, ppt-miR414, pta-miR951, pab-miR951, gma-miR5030, tae-miR5086, bra-miR5720, pde-miR951, mtr-miR7698-5p, bdi-miR167e-3p, gra-miR8632, gma-miR9725, ata-miR167b-3p
PP2A10 At1g10150 F14N23.3	20	osa-miR166g-3p, osa-miR166h-3p, sbi-miR166f, zma-miR166l-3p, zma-miR166m-3p, ptc-miR166p, mtr-miR166c, mtr-miR166f, aqc-miR166a, aqc-miR166d, pab-miR166a, tcc-miR166c, osa-miR5534a, ssl-miR166a, dpr-miR166a, cme-miR166e, mes-miR166j, lja-miR408, stu-miR166b, sly-miR166c-3p
WTF9 At2g39120 T7F6.29	20	tae-miR1137a, vvi-miR828a, mtr-miR2612, aly-miR823-5p, vvi-miR477b-3p, gma-miR4364b, ath-miR5013, ath-miR5015, ssl-miR828, gma-miR828a, gma-miR828b, ptc-miR828a, ptc-miR828b-5p, mdm-miR828a, mdm-miR828b, cme-miR828, mes-miR828a, mes-miR828b, sly-miR169e-3p, bdi-miR9484
At3g16150 MSL1.19	20	zma-miR169e, osa-miR817, vvi-miR166a, vvi-miR166b, aly-miR165a-3p, vvi-miR3625-5p, gma-miR166h-3p, bdi-miR166f, bdi-miR166e-3p, mtr-miR5556-3p, gma-miR166k, bna-miR6032, gma-miR166u, hme-miR-263b, hbr-miR166a, pde-miR166a, pde-miR166b, sbi-miR5568e-3p, gra-miR8668, bra-miR6032-5p
JAL19 At1g73040 F3N23.24	20	osa-miR395u, ath-miR401, ptc-miR408-5p, ptc-miR475a-5p, ptc-miR475b-5p, ptc-miR475d-5p, ppt-miR902h-3p, ppt-miR1024b, osa-miR1851, ath-miR4228-3p, pab-miR482d, bdi-miR5070, mdm-miR408b, mdm-miR408c, mdm-miR408d, lja-miR408, lja-miR7529, stu-miR8033-3p, gra-miR8640, gra-miR8698
	20	ptc-miR171g-5p, ptc-miR171h-5p, aly-miR859-5p, bdi-miR5185a-3p, bdi-miR5185b-3p, gma-miR4401b, gma-miR5772, bdi-miR5185c-3p, bdi-miR5185d-3p, bdi-miR5185e-3p, bdi-miR5185f-3p, bdi-miR5185g-3p, bdi-miR5185h-3p, bdi-miR5185i-3p, bdi-miR5185j-3p, bdi-miR5185k-3p, bdi-miR5185m-3p, stu-miR8024a-5p, stu-miR8024a-3p, stu-miR8024b
At4g09670 F17A8.20	20	mtr-miR171a, ptc-miR399h, ath-miR780.1, cre-miR911, ppt-miR1038-5p, osa-miR810b.2, osa-miR827, mtr-miR2592s-3p, zma-miR827-3p, ghr-miR827a, ghr-miR827b, ghr-miR827c, csi-miR827, tcc-miR827, bdi-miR827-3p, ssp-miR827, osa-miR5535, mes-miR827, mtr-miR2592bq-3p, rgl-miR7803b-5p
SCL7	20	mtr-miR171a, ptc-miR399h, ath-miR780.1, cre-miR911, ppt-miR1038-5p, osa-miR810b.2, osa-miR827, mtr-miR2592s-3p, osa-miR1863b, zma-miR827-3p, ghr-miR827a, ghr-miR827b, ghr-miR827c, csi-miR827, tcc-miR827, bdi-miR827-3p, ssp-miR827, mes-miR827, mtr-miR2592bq-3p, rgl-miR7803b-5p
RPS20B At3g47370 T21L8.120	20	osa-miR171f-5p, gma-miR1514a-5p, gma-miR1514b-5p, osa-miR1846a-3p, osa-miR1846b-3p, aly-miR844-5p, aly-miR3448-5p, aly-miR4245, gma-miR4399, sbi-miR5385, osa-miR5497, mtr-miR5557-3p, ath-miR4245, ghr-miR7510a, bdi-miR7757-3p.2, ptc-miR7819, gra-miR7492e, gra-miR7492f, gra-miR8728, gma-miR9740
RPS20A At3g45030 F14D17_100; RPS20C At5g62300 MMI9.13 MMI9_120	20	ath-miR169f-3p, ath-miR865-5p, ppt-miR1070, gma-miR1512a-3p, bdi-miR1135, aly-miR169d-3p, aly-miR169e-3p, aly-miR169f-3p, aly-miR169g-3p, gma-miR1516b, sbi-miR5568a, stu-miR6022, sly-miR6022, nta-miR6148a, stu-miR6149-5p, bra-miR9552a-3p, bra-miR9552b-3p, bra-miR9552b-3p, tae-miR9776, ata-miR9776-5p
BXL6 At5g10560 F12B17.90	20	ath-miR824-5p, bol-miR824, bra-miR824, bna-miR824, osa-miR1882a, osa-miR1882b, osa-miR1882c, osa-miR1882d, osa-miR1882e-5p, osa-miR1882f, osa-miR1882g, osa-miR1882h, mtr-miR2111d-3p, aly-miR824-5p, gma-miR5374-5p, hme-miR-12, ptc-miR6479, esi-miR8623c, gra-miR8659a, gra-miR8659b
VPS2.1 CHMP2-1 SLP At2g06530 T12H3.8	20	ath-miR156g, smo-miR156a, aly-miR156g-5p, bdi-miR5185a-5p, bdi-miR5185b-5p, mtr-miR5227, rgl-miR5574, nta-miR156f, bdi-miR159b-3p.2, bdi-miR5185c-5p, bdi-miR5185d-5p, bdi-miR5185e-5p, bdi-miR5185f-5p, bdi-miR5185g-5p, bdi-miR5185h-5p, bdi-miR5185i-5p, bdi-miR5185j-5p, bdi-miR5185k-5p, bdi-miR7727-5p, gra-miR8648
At1g05910 T20M3.19	20	ptc-miR478a, ptc-miR478b, ptc-miR478c, ath-miR774b-3p, gma-miR1523b, ath-miR5633, stu-miR399a-5p, stu-miR399b-5p, stu-miR399c-5p, stu-miR399d-5p, stu-miR399e-5p, stu-miR399f-5p, stu-miR399g-5p, stu-miR399h, stu-miR399j-5p, stu-miR399k-5p, stu-miR399l-5p, stu-miR399m-5p, stu-miR399n-5p, stu-miR399o-5p
At1g29880 F1N18.8	20	ath-miR159b-3p, ath-miR159c, osa-miR159c, osa-miR159d, osa-miR159e, sof-miR159c, zma-miR159c-3p, zma-miR159d-3p, sbi-miR159b, ptc-miR159d, pta-miR159a, pta-miR159c, smo-miR159, aly-miR159b-3p, aly-miR159c-3p, mdm-miR159a, mdm-miR159b, cme-miR159b, cpa-miR159b, gra-miR7492d
RBG4 GR-RBP4 GRP4 MRBP1B At3g23830 F14O13_2	20	ath-miR396a-3p, osa-miR396a-3p, osa-miR396b-3p, zma-miR396b-3p, zma-miR396a-3p, zma-miR171k-5p, zma-miR171h-5p, mtr-miR396b-3p, smo-miR1101-5p, gma-miR1513a-3p, aly-miR396a-3p, bdi-miR396d-3p, bdi-miR396c-3p, mtr-miR5257, gma-miR396i-3p, ath-miR5633, sbi-miR2118-5p, gra-miR8632, sly-miR396a-3p, ata-miR396e-3p
RBG4 GR-RBP4 GRP4 MRBP1B At3g23830 F14O13_2	20	ath-miR396a-3p, osa-miR396a-3p, osa-miR396b-3p, zma-miR396b-3p, zma-miR396a-3p, zma-miR171k-5p, zma-miR171h-5p, mtr-miR396b-3p, smo-miR1101-5p, gma-miR1513a-3p, aly-miR396a-3p, bdi-miR396d-3p, bdi-miR396c-3p, mtr-miR5257, gma-miR396i-3p, ath-miR5633, sbi-miR2118-5p, gra-miR8632, sly-miR396a-3p, ata-miR396e-3p
RBG4 GR-RBP4 GRP4 MRBP1B At3g23830 F14O13_2	20	ath-miR390a-3p, ath-miR390b-3p, osa-miR390-3p, ppt-miR1047-5p, osa-miR810b.1, zma-miR390a-3p, zma-miR390b-3p, aly-miR390a-3p, aly-miR390b-3p, gma-miR5042-5p, bdi-miR390a-3p, nta-miR6020a-3p, lja-miR390a-3p, lja-miR390b-3p, gra-miR7502b, gra-miR7502c, gra-miR8772, gra-miR8674c, sly-miR390b-3p, ata-miR390-3p
RBG4 GR-RBP4 GRP4 MRBP1B At3g23830 F14O13_2	20	osa-miR1846d-3p, mtr-miR2656a, mtr-miR2656b, aqc-miR171e, aly-miR3447-3p, aly-miR4243, aly-miR4248a, aly-miR4248b, aly-miR4248c, pab-miR3708, mtr-miR5226, hme-miR-1a, hme-miR-263b, hme-miR-279b, mtr-miR2656c, mtr-miR2656d, mtr-miR2656e, cpa-miR8152, gra-miR7494d, bra-miR9556-3p
RIPK PBL14 PIX8 At2g05940	20	osa-miR319a-3p, zma-miR169e, ppt-miR902h-3p, bna-miR1140, mtr-miR2591, mtr-miR2634, mtr-miR2670a, mtr-miR2670b, mtr-miR2670c, mtr-miR2670d, aly-miR319b-5p, bra-miR1140, bdi-miR7715-3p, bdi-miR7732-5p, rgl-miR7797a, stu-miR319a-5p, bdi-miR9497, gma-miR9745, ata-miR398f-5p, ata-miR319-3p
RIPK PBL14 PIX8 At2g05940	20	ath-miR782, gma-miR1507a, gma-miR1533, osa-miR2099-5p, gma-miR1507b, vun-miR1507a, vun-miR1507b, mtr-miR2199, gso-miR1507a, gso-miR1507b, mtr-miR5296, mtr-miR5557-3p, ath-miR5640, mtr-miR5748, hme-miR-13b, ptc-miR6451, sbi-miR6224a-3p, sbi-miR6224b-3p, sbi-miR6224c-3p, gra-miR8691
RIPK PBL14 PIX8 At2g05940	20	ath-miR773a, ppt-miR1223b, ppt-miR1223c, ppt-miR1223j, osa-miR1320-5p, bdi-miR5057, mtr-miR5210, mtr-miR5281b, mtr-miR5281c, mtr-miR5281d, mtr-miR5281e, mtr-miR5281f, nta-miR6157, hvu-miR6213, mdm-miR393d, mdm-miR393e, mdm-miR393f, mdm-miR7127a, mdm-miR7127b, bdi-miR7771-5p
RIPK PBL14 PIX8 At2g05940	20	ath-miR773a, ppt-miR1223b, ppt-miR1223c, ppt-miR1223j, osa-miR1320-5p, bdi-miR5057, mtr-miR5210, mtr-miR5281b, mtr-miR5281c, mtr-miR5281d, mtr-miR5281e, mtr-miR5281f, nta-miR6157, hvu-miR6213, mdm-miR393d, mdm-miR393e, mdm-miR393f, mdm-miR7127a, mdm-miR7127b, bdi-miR7771-5p
RIPK PBL14 PIX8 At2g05940	20	ath-miR158a-3p, ath-miR158b, ath-miR846-5p, cre-miR907, mtr-miR2629a, mtr-miR2629d, mtr-miR2629e, mtr-miR2629b, mtr-miR2629c, mtr-miR2629f, mtr-miR2629g, aly-miR158a-3p, aly-miR158b-3p, aau-miR160, mtr-miR5225b, mtr-miR5225c, pde-miR396, ddi-miR-7101, bdi-miR7781-5p, bra-miR158-3p
PBL19 At5g47070 K14A3.2	20	ath-miR167a-3p, pta-miR946a-3p, pta-miR946b, osa-miR2105, mtr-miR2646a, mtr-miR2646b, aly-miR161-3p.1, aly-miR167a-3p, gma-miR5044, mtr-miR5554a-5p, mtr-miR5554b-5p, mtr-miR5554c-5p, sly-miR6023, bna-miR6029, cca-miR6105a, pde-miR946, stu-miR164-3p, sly-miR9474-5p, bdi-miR9483a, bdi-miR9483b
PRP4 At4g38770 T9A14.50	20	ath-miR167a-3p, pta-miR946a-3p, pta-miR946b, osa-miR2105, mtr-miR2646a, mtr-miR2646b, aly-miR161-3p.1, aly-miR167a-3p, gma-miR5044, mtr-miR5554a-5p, mtr-miR5554b-5p, mtr-miR5554c-5p, sly-miR6023, bna-miR6029, cca-miR6105a, pde-miR946, stu-miR164-3p, sly-miR9474-5p, bdi-miR9483a, bdi-miR9483b
NLP1 Os03g0131100 LOC_Os03g03900 OJ1004C08.16 OsJ_09292	20	bdi-miR1127, mtr-miR2647a, mtr-miR2647b, mtr-miR2647c, mtr-miR5225a, mtr-miR5272f, gma-miR5368, hvu-miR6195, hme-miR-2797, pde-miR3704a, cme-miR399g, sbi-miR5568e-3p, sbi-miR6233-5p, stu-miR1886a, stu-miR1886b, stu-miR1886c, stu-miR1886d, stu-miR1886e, stu-miR1886f, sly-miR156e-5p
FT1	20	gma-miR1514a-3p, gma-miR1514b-3p, mtr-miR2086-3p, ahy-miR3513-3p, gma-miR1512b, aau-miR2086, amg-miR2086, gma-miR5772, osa-miR5789, hme-miR-745, mdm-miR171i, sbi-miR2118-5p, lja-miR171c, stu-miR8008a, stu-miR8009, stu-miR479, gra-miR8771e, bra-miR9567-5p, tae-miR9773, ata-miR171a-3p
TULP8 TULP1 Os05g0437900 LOC_Os05g36190 OJ1058_F05.11 OsJ_017918 OsJ_18676 OSJNBb0042J17.6	20	zma-miR2275b-3p, zma-miR2275c-3p, mtr-miR2655a, mtr-miR2655c, mtr-miR2655d, mtr-miR2655e, mtr-miR2655f, mtr-miR2655g, mtr-miR2655h, mtr-miR2655i, mtr-miR2655j, mtr-miR2655k, mtr-miR2655l, mtr-miR2655m, mtr-miR2655n, mtr-miR2655o, zma-miR395l-5p, zma-miR395m-5p, vvi-miR2950-5p, mes-miR2950
SFH9 At3g24840 K7P8.13	20	cre-miR905-3p, ppt-miR1033a, ppt-miR1033b, ppt-miR1033c, ppt-miR1033d, ppt-miR1033e, osa-miR1850.1, osa-miR1854-5p, mtr-miR2638a, mtr-miR2638b, aly-miR856-5p, aly-miR4227, ath-miR5018, osa-miR5811, ddi-miR-7100, rgl-miR7807a-5p, gra-miR7494e, gra-miR7494f, gra-miR7484n, gma-miR9732
SFH9 At3g24840 K7P8.13	20	zma-miR171b-5p, zma-miR319b-5p, zma-miR319d-5p, ptc-miR477a-3p, osa-miR395w, ath-miR834, ath-miR855, ppt-miR1077-3p, osa-miR1860-3p, aly-miR834-3p, pab-miR3706, gma-miR4345, gma-miR4394, mtr-miR5562-3p, cca-miR6114-5p, nta-miR6162, bdi-miR7714-3p, bdi-miR7729b-3p, gra-miR8634, sly-miR9478-3p
At5g40400 MPO12.110	20	zma-miR171b-5p, zma-miR319b-5p, zma-miR319d-5p, ptc-miR477a-3p, osa-miR395w, ath-miR834, ath-miR855, ppt-miR1077-3p, osa-miR1860-3p, aly-miR834-3p, pab-miR3706, gma-miR4345, gma-miR4394, mtr-miR5562-3p, cca-miR6114-5p, nta-miR6162, bdi-miR7714-3p, bdi-miR7729b-3p, gra-miR8634, sly-miR9478-3p
RACK1A Os01g0686800 LOC_Os01g49290	20	osa-miR2118b, osa-miR2118d, osa-miR2118f, osa-miR2118j, osa-miR2118m, osa-miR2118n, osa-miR2118o, osa-miR2118p, zma-miR2118b, zma-miR2118d, gso-miR482a, gso-miR482b, gma-miR4410, mtr-miR5211, sbi-miR2118-3p, stu-miR8036-3p, bdi-miR2118b, ata-miR2118c-3p, ata-miR2118b-5p, ata-miR2118d-3p
	20	osa-miR2118b, osa-miR2118d, osa-miR2118f, osa-miR2118j, osa-miR2118m, osa-miR2118n, osa-miR2118o, osa-miR2118p, zma-miR2118b, zma-miR2118d, gso-miR482a, gso-miR482b, gma-miR4410, mtr-miR5211, sbi-miR2118-3p, stu-miR8036-3p, bdi-miR2118b, ata-miR2118c-3p, ata-miR2118b-5p, ata-miR2118d-3p
RACK1B Os05g0552300 LOC_Os05g47890 OsJ_19467 OSJNBa0079H23.13 P0560C03.18	20	ath-miR391-3p, ath-miR417, ppt-miR894, pta-miR952a, osa-miR1882a, osa-miR1882b, osa-miR1882c, osa-miR1882d, osa-miR1882e-5p, osa-miR1882f, osa-miR1882g, osa-miR1882h, ppt-miR2079, mtr-miR2631, aly-miR391-3p, bdi-miR5181b, osa-miR5508, gra-miR399, bol-miR9408, bra-miR391-3p
BC10 FC116 Os05g0170000 LOC_Os05g07790 OsJ_17281 P0685E10.4	20	osa-miR396e-5p, tae-miR1131, ddi-miR-1177, aly-miR173a-3p, far-miR396, gma-miR4994-3p, bdi-miR396a-5p, bdi-miR396b-5p, nta-miR6146b, mdm-miR7122a, mdm-miR7122b, bdi-miR7713-3p, bdi-miR7743-5p, bdi-miR7745-3p, bdi-miR7708b-3p, stu-miR7984c-5p, aly-miR173b-3p, ata-miR396a-5p, ata-miR396d-5p, ata-miR396b-5p
BC10 FC116 Os05g0170000 LOC_Os05g07790 OsJ_17281 P0685E10.4	20	osa-miR396e-5p, mtr-miR399j, tae-miR1131, ddi-miR-1177, far-miR396, gma-miR4994-3p, bdi-miR396a-5p, bdi-miR396b-5p, nta-miR6146b, mdm-miR7122a, mdm-miR7122b, bdi-miR7713-3p, bdi-miR7743-5p, bdi-miR7745-3p, bdi-miR7708b-3p, stu-miR7984c-5p, ata-miR396a-5p, ata-miR396d-5p, ata-miR396b-5p, ata-miR9776-3p
ICS2 At1g18870 F6A14.3	20	osa-miR444a-3p.1, ath-miR864-5p, tae-miR444a, osa-miR444d.1, osa-miR2122, zma-miR2275a-3p, zma-miR2275d-3p, bdi-miR444a, ath-miR841b-3p, aly-miR4221, tae-miR444b, hvu-miR444a, bdi-miR319a, mtr-miR5257, mtr-miR5557-5p, mes-miR2275, bdi-miR7769-5p, rgl-miR7807a-5p, stu-miR8025-3p, ata-miR2275b-3p
WRKY75 At5g13080 T19L5.40	20	ppt-miR1211-3p, osa-miR1432-5p, osa-miR1432-5p, gma-miR1536, osa-miR2104, sbi-miR1432, sbi-miR1432, zma-miR1432-5p, zma-miR1432-5p, vvi-miR3627-5p, ssp-miR1432, ssp-miR1432, gma-miR5786, hme-miR-6306-5p, stu-miR393-3p, bdi-miR1432, bdi-miR1432, tae-miR9774, ata-miR1432-5p, ata-miR1432-5p
NAC081 ATAF2 At5g08790 T2K12.140	20	mtr-miR156g-5p, vvi-miR166a, vvi-miR166b, aly-miR165a-3p, aly-miR165b-3p, aly-miR399g-5p, aly-miR399h-5p, aly-miR399i-5p, gma-miR4387c, ath-miR5633, nta-miR6163, hbr-miR166a, pde-miR166a, pde-miR166b, cme-miR156e, mtr-miR399s-5p, mtr-miR399t-5p, stu-miR8007b-5p, stu-miR8027, stu-miR8051-5p
PDIL2-3 PDIL5-1 Os09g0451500 LOC_Os09g27830 OJ1163_C07.26 P0488D02.3	20	osa-miR1319a, mtr-miR2585a, mtr-miR2585b, mtr-miR2585c, mtr-miR2585d, ghr-miR399c, aly-miR844-5p, esi-miR3457-5p, gso-miR482a, gso-miR482b, osa-miR5071, gma-miR5368, ath-miR5999, stu-miR6026-3p, sly-miR6026, ptc-miR6466-3p, cme-miR399d, cme-miR399e, rgl-miR7797b, gra-miR3476
PDIL2-3 PDIL5-1 Os09g0451500 LOC_Os09g27830 OJ1163_C07.26 P0488D02.3	20	ath-miR399a, mtr-miR399c, ptc-miR399j, mtr-miR399h, mtr-miR399i, smo-miR1085-5p, vvi-miR399f, sbi-miR821a, sbi-miR821c, sbi-miR821e, ghr-miR399d, aly-miR399f-3p, tcc-miR399f, gma-miR403a, gma-miR403b, gma-miR5679, bna-miR399c, cca-miR399, hme-miR-306, gra-miR8769
PDIL2-3 PDIL5-1 Os09g0451500 LOC_Os09g27830 OJ1163_C07.26 P0488D02.3	20	zma-miR169a-3p, zma-miR169b-3p, cre-miR1156.2, ath-miR1886.3, aly-miR829-5p, aly-miR831-3p, vvi-miR3629a-5p, osa-miR3982-5p, mtr-miR5743a, mtr-miR5743b, sbi-miR5568f-5p, mtr-miR319c-5p, bdi-miR7779-3p, gra-miR7502b, gra-miR7502b, gra-miR7502c, gra-miR7502c, gra-miR8714, tae-miR531, ata-miR2275b-5p
PDIL2-3 PDIL5-1 Os09g0451500 LOC_Os09g27830 OJ1163_C07.26 P0488D02.3	19	mtr-miR2675, mtr-miR5267a, mtr-miR5267b, mtr-miR5267c, mtr-miR5267d, mtr-miR5267e, mtr-miR5267f, mtr-miR5267g, mtr-miR5267h, mtr-miR5267i, mtr-miR5267j, mtr-miR5267k, mtr-miR5267l, mtr-miR5267m, mtr-miR5267n, mtr-miR5267o, gma-miR3522, lja-miR7542, stu-miR8029
DOF5.4 OBP4 At5g60850 MAE1.9	19	pta-miR156b, smo-miR1114, pvu-miR1514a, osa-miR2120, mtr-miR5267a, mtr-miR5267b, mtr-miR5267c, mtr-miR5267d, mtr-miR5267e, mtr-miR5267f, mtr-miR5267g, mtr-miR5267h, mtr-miR5267i, mtr-miR5267j, mtr-miR5267k, mtr-miR5267m, mtr-miR5267n, hme-miR-932, stu-miR408a-3p
AFC1 AME2 At3g53570 F4P12_270	19	cre-miR1144a.2, mtr-miR2652a, mtr-miR2652b, mtr-miR2652c, mtr-miR2652d, mtr-miR2652e, mtr-miR2652f, mtr-miR2652g, mtr-miR2652h, mtr-miR2652i, mtr-miR2652j, mtr-miR2652k, mtr-miR2652l, gma-miR4394, ath-miR5655, gma-miR169t, mtr-miR2652m, bdi-miR5185m-3p, bdi-miR7756-5p
At1g30570 T5I8.2	19	ppt-miR902c-3p, ppt-miR902c-3p, ppt-miR902e-3p, ppt-miR902e-3p, ppt-miR902f-3p, ppt-miR902f-3p, ppt-miR902g-3p, ppt-miR902g-3p, mtr-miR2679a, mtr-miR2679b, mtr-miR2679c, aly-miR399f-5p, aly-miR3442-5p, gso-miR2109, gso-miR2109, bdi-miR5180b, bdi-miR5180a, ddi-miR-7103, stu-miR8049-3p
FRL3 At5g48385 MJE7.2	19	osa-miR167e-3p, osa-miR167e-3p, osa-miR167i-3p, osa-miR167i-3p, zma-miR167h-3p, zma-miR167h-3p, zma-miR167i-3p, zma-miR167i-3p, ptc-miR167f-3p, ptc-miR167g-3p, ptc-miR167h-3p, ath-miR782, ahy-miR167-3p, bdi-miR167d-3p, bdi-miR167d-3p, mtr-miR167b-3p, gra-miR167a, gra-miR167b, ata-miR167f-3p
RPS19A Os03g0424800 LOC_Os03g31134 OsJ_11334 OSJNBa0032H19.4; RPS19B Os03g0424500 LOC_Os03g31090 OsJ_11332 OSJNBa0032H19.8	19	ptc-miR169ac, ptc-miR169ad, ptc-miR169ae, ptc-miR169af, ptc-miR169q, ptc-miR403c-5p, zma-miR169l-5p, tcc-miR169g, bdi-miR169j-5p, bdi-miR5179, osa-miR5179, mdm-miR482d, cme-miR169o, cme-miR169m, cme-miR169j, cme-miR169b, cme-miR169a, cme-miR169i, cme-miR169l
RPS19A Os03g0424800 LOC_Os03g31134 OsJ_11334 OSJNBa0032H19.4; RPS19B Os03g0424500 LOC_Os03g31090 OsJ_11332 OSJNBa0032H19.8	19	ptc-miR169u-3p, tae-miR1136, gma-miR159b-3p, gma-miR159c, mtr-miR2592s-3p, mtr-miR159b, gma-miR159f-3p, sbi-miR5565e, ath-miR5645a, ath-miR5645b, ath-miR5645d, ath-miR5645f, ath-miR5645e, hvu-miR6182, sbi-miR6217a-5p, sbi-miR6217b-5p, mtr-miR2592bq-3p, stu-miR172c-5p, bdi-miR9488
RPS19A Os03g0424800 LOC_Os03g31134 OsJ_11334 OSJNBa0032H19.4; RPS19B Os03g0424500 LOC_Os03g31090 OsJ_11332 OSJNBa0032H19.8	19	ptc-miR167f-5p, ptc-miR167g-5p, smo-miR1103-5p, gma-miR167e, gma-miR167f, aly-miR774a-5p.1, ahy-miR167-5p, aly-miR3444b, gma-miR4412-3p, csi-miR167b, tcc-miR167c, mdm-miR167h, mdm-miR167i, mdm-miR167j, cme-miR167c, mes-miR167g, mes-miR167h, cpa-miR167c, esi-miR8624b
At2g34160 T14G11.28	19	ath-miR397b, ath-miR771, cre-miR911, aqc-miR171e, aly-miR771-5p, gma-miR4376-5p, mtr-miR5225a, mtr-miR5274b-5p, ptc-miR482b-5p, mdm-miR3627a, mdm-miR3627b, mdm-miR3627c, bdi-miR7716-3p, bdi-miR7726a-5p, rgl-miR7807a-3p, gra-miR8725, gra-miR8754, bra-miR9556-3p, tae-miR1137b-5p
Os07g0563300 LOC_Os07g37610 OJ1720_F04.105	19	cre-miR1152, ptc-miR530a, osa-miR1861e, osa-miR1861k, osa-miR1861m, aqc-miR477e, aqc-miR477a, aqc-miR477b, aly-miR4233, vvi-miR477b-5p, csi-miR530a, csi-miR530b, tcc-miR530b, gma-miR319f, htu-miR530, cme-miR530a, mes-miR530a, mes-miR530b, ptc-miR7821
XAT3 Os03g0567600 LOC_Os03g37010 OsJ_11476 OSJNBa0026A15.4	19	ath-miR398a-3p, osa-miR398a, gma-miR398a, gma-miR398b, ptc-miR398a, mtr-miR398a-3p, vvi-miR398a, bol-miR398a-3p, aqc-miR398a, csi-miR398, rco-miR398a, gra-miR398, ghr-miR398, aly-miR398a-3p, tcc-miR398b, ath-miR5650, hvu-miR6210, mdm-miR398a, cme-miR398b
XAT2 Os02g0330200 LOC_Os02g22480 OJ1116_E03.2 OsJ_06523	19	ptc-miR473b, osa-miR1868, mtr-miR2671j, mtr-miR2671a, mtr-miR2671b, mtr-miR2671c, mtr-miR2671d, mtr-miR2671e, mtr-miR2671f, mtr-miR2671g, mtr-miR2671h, mtr-miR2671i, rgl-miR5574, bdi-miR7725b-3p.1, rgl-miR7807b-3p, stu-miR8048-5p, gra-miR8742a, gra-miR8742b, tae-miR9773
LRX6 At3g22800 MWI23.17	19	ptc-miR156k, ppt-miR160h, smo-miR156d, vvi-miR156a, esi-miR3454a-5p, esi-miR3454c-5p, esi-miR3454b-5p, esi-miR3454e-5p, ath-miR3932b-5p, osa-miR5144-5p, gma-miR156p, gma-miR156t, dpr-miR156a, hci-miR156b, cme-miR156h, cme-miR156g, sbi-miR5565g-3p, mes-miR1446, stu-miR8007b-3p
PRR1 Os02g0618200 LOC_Os02g40510 OJ1014_H03.23 OJ1212_C01.9 OsJ_07546	19	ath-miR162a-5p, ath-miR162b-5p, vvi-miR172d, gma-miR1533, sly-miR1917, csi-miR162-5p, aly-miR162a-5p, aly-miR162b-5p, aly-miR3435-3p, esi-miR3466-5p, aau-miR172, stu-miR8040-5p, stu-miR8040-3p, stu-miR162a-5p, stu-miR162b-5p, gra-miR8709b, bol-miR9408, bra-miR9408-3p, bra-miR162-5p
PRR1 Os02g0618200 LOC_Os02g40510 OJ1014_H03.23 OJ1212_C01.9 OsJ_07546	19	ptc-miR159c, gma-miR159b-3p, gma-miR159c, osa-miR827, zma-miR827-3p, aly-miR3434-3p, aly-miR4244, hvu-miR5051, bdi-miR827-3p, ssp-miR827, mtr-miR5212-5p, mtr-miR159b, gma-miR159f-3p, hbr-miR6483, mes-miR159c, mes-miR159d, lja-miR7520, bol-miR9408, tae-miR9660-5p
CYB561B ACYB-1 CYB-1 CYB561B2 CYBASC2 CYTB561 At5g38630 MBB18.18	19	ath-miR782, gma-miR1507a, gma-miR1533, osa-miR2099-5p, gma-miR1507b, vun-miR1507a, vun-miR1507b, mtr-miR2199, gso-miR1507a, gso-miR1507b, mtr-miR5296, mtr-miR5557-3p, ath-miR5640, mtr-miR5748, hme-miR-13b, ptc-miR6451, sbi-miR6224a-3p, sbi-miR6224b-3p, sbi-miR6224c-3p
YSL12 Os04g0524600 LOC_Os04g44320 OSJNBb0065J09.17	19	gma-miR319c, ath-miR773a, ppt-miR1223b, ppt-miR1223c, ppt-miR1223j, osa-miR1320-5p, osa-miR2863b, bdi-miR5057, mtr-miR5210, mtr-miR5281b, mtr-miR5281c, mtr-miR5281d, mtr-miR5281e, mtr-miR5281f, hvu-miR6213, mdm-miR7127a, mdm-miR7127b, bdi-miR7771-5p, bdi-miR9486a
PPA4 At3g53620 F4P12.320	19	ppt-miR535a, ppt-miR535b, ppt-miR535c, osa-miR535-5p, ppt-miR535d, vvi-miR535a, vvi-miR535b, vvi-miR535c, osa-miR1858a, osa-miR1858b, aqc-miR535, rco-miR535, pab-miR535, csi-miR535, mdm-miR535a, mdm-miR535d, mes-miR535a, mes-miR535b, cpa-miR535
MKK4 At1g51660 F19C24.26	19	zma-miR171a-5p, ath-miR824-3p, osa-miR2275a, osa-miR2275b, zma-miR2275a-3p, zma-miR2275d-3p, zma-miR169m-3p, aly-miR824-3p, pab-miR3709a, bdi-miR5178-3p, osa-miR2275d, stu-miR482d-3p, sly-miR482b, bdi-miR2275a, bdi-miR2275c, tae-miR2275-3p, ata-miR2275a-3p, ata-miR2275b-3p, ata-miR2275c-3p
SKD1 VPS4 At2g27600 F10A12.27 F15K20	19	ath-miR851-5p, osa-miR1876, ath-miR2111b-3p, bna-miR2111b-3p, zma-miR396g-5p, zma-miR396h, aly-miR2111b-3p, vvi-miR3635-3p, gma-miR4396, gma-miR4409, gma-miR4992, mtr-miR2670e, gma-miR3522, cca-miR396b, hme-miR-8, pde-miR396, mdm-miR396a, ptc-miR7813, bra-miR9563a-3p
MOS4 BCAS2 SPF27 At3g18165 MRC8.16	19	osa-miR160a-3p, osa-miR160b-3p, osa-miR160c-3p, osa-miR160d-3p, zma-miR160a-3p, zma-miR160d-3p, zma-miR160b-3p, ppt-miR1060, zma-miR160g-3p, bdi-miR160a-3p, bdi-miR160b-3p, bdi-miR160c-3p, bdi-miR160d-3p, nta-miR6145b, pde-miR949a, bdi-miR7723b-3p, gra-miR8675c, ata-miR160b-3p, ata-miR160c-3p
SKD1 VPS4 At2g27600 F10A12.27 F15K20	19	osa-miR530-5p, ppt-miR1030a, ppt-miR1030b, ppt-miR1030c, ppt-miR1030d, ppt-miR1030e, ppt-miR1030f, ppt-miR1030g, ppt-miR1030h, ppt-miR1030i, ppt-miR1030j, smo-miR1101-3p, ptc-miR530b, aqc-miR530, csi-miR530b, cme-miR530b, stu-miR530, bdi-miR530a, bdi-miR530b
PAP13 FBN7b FIB7b At2g42130 T24P15.4	19	ath-miR415, zma-miR172d-5p, zma-miR172b-5p, zma-miR172c-5p, ptc-miR172b-5p, ptc-miR172g-5p, ptc-miR172h-5p, ppt-miR1217-5p, ptc-miR171l-3p, ptc-miR171m, ptc-miR171j, aly-miR172c-5p, osa-miR5080, pde-miR949a, stu-miR172a-5p, stu-miR172d-5p, aly-miR172f-5p, bra-miR9555b-3p, tae-miR9663-5p
PAP13 FBN7b FIB7b At2g42130 T24P15.4	19	ppt-miR1028a-5p, ppt-miR1028b-5p, osa-miR2099-5p, mtr-miR2644, ghr-miR7510a, stu-miR8011b-5p, stu-miR399a-5p, stu-miR399b-5p, stu-miR399c-5p, stu-miR399d-5p, stu-miR399e-5p, stu-miR399f-5p, stu-miR399g-5p, stu-miR399h, stu-miR399k-5p, stu-miR399l-5p, stu-miR399m-5p, stu-miR399n-5p, stu-miR399o-5p
PAP13 FBN7b FIB7b At2g42130 T24P15.4	19	ath-miR158a-3p, osa-miR528-5p, cre-miR919.2, ppt-miR1038-3p, zma-miR528a-5p, zma-miR528b-5p, sbi-miR528, aly-miR158a-3p, aly-miR158b-3p, bdi-miR528-5p, ssp-miR528, ghr-miR7502, mtr-miR7698-5p, bdi-miR5163b-5p, stu-miR8032a-3p, stu-miR8032e-3p, gra-miR7502f, gma-miR9742, ata-miR528-5p
At1g55760 F20N2.15	19	sbi-miR164c, ptc-miR166n, ptc-miR166o, ptc-miR166p, ptc-miR166q, pta-miR949, cre-miR1150.1, cre-miR1171, zma-miR164e-5p, esi-miR3467-5p, ath-miR4228-5p, pab-miR166b, osa-miR5818, cca-miR6118-3p, ptc-miR6468-3p, pde-miR949b, bdi-miR166j, ata-miR9776-5p, ata-miR166c-3p
At1g55760 F20N2.15	19	ppt-miR1063a, ppt-miR1063b, ppt-miR1063c, ppt-miR1063d, ppt-miR1063e, ppt-miR1063f, ppt-miR1063g, ppt-miR1063h, osa-miR1850.1, osa-miR1860-3p, aly-miR403a-5p, esi-miR3468-5p, aly-miR4222, ath-miR4228-3p, mtr-miR160f, aau-miR160, stu-miR1886g-3p, aly-miR403b-5p, bra-miR403-5p
TPR3 ASPR1 TPR1 Os03g0254700 LOC_Os03g14980 OsJ_08437	19	ath-miR846-5p, mtr-miR2659a, mtr-miR2659b, mtr-miR2659c, mtr-miR2659d, mtr-miR2659e, mtr-miR2659f, osa-miR812n-3p, bdi-miR5061, mtr-miR5205b, gma-miR5679, osa-miR812t, osa-miR812u, mtr-miR2659g, mtr-miR2659h, mtr-miR2659i, mtr-miR2659j, mtr-miR2659k, bdi-miR9481a
TPR3 ASPR1 TPR1 Os03g0254700 LOC_Os03g14980 OsJ_08437	19	ath-miR159c, osa-miR159e, sof-miR159c, zma-miR159c-3p, zma-miR159d-3p, sbi-miR159b, ptc-miR159d, pta-miR159c, smo-miR159, aly-miR159c-3p, ath-miR5012, ath-miR5025, mdm-miR159a, mdm-miR159b, cme-miR159b, stu-miR7984a, stu-miR7984b-5p, cpa-miR159b, esi-miR8631
HST HCT	19	mtr-miR2592ap, mtr-miR2592aq, mtr-miR2592ar, mtr-miR2592as, mtr-miR2592at, mtr-miR2592au, mtr-miR2592av, mtr-miR2592aw, mtr-miR2592ax, mtr-miR2592ay, mtr-miR2592az, mtr-miR2592ba, mtr-miR2592bb, mtr-miR2592bc, mtr-miR2592bd, mtr-miR2592be, mtr-miR2592bf, mtr-miR2592bg, gra-miR8723b
HST HCT	19	osa-miR396e-5p, tae-miR1131, ddi-miR-1177, far-miR396, gma-miR4994-3p, bdi-miR396a-5p, bdi-miR396b-5p, nta-miR6146b, mdm-miR7122a, mdm-miR7122b, bdi-miR7713-3p, bdi-miR7743-5p, bdi-miR7745-3p, bdi-miR7708b-3p, stu-miR7984c-5p, ata-miR396a-5p, ata-miR396d-5p, ata-miR396b-5p, ata-miR9776-3p
Os04g0656100 LOC_Os04g56160 OSJNBa0071I13.11	19	osa-miR396e-5p, tae-miR1131, ddi-miR-1177, far-miR396, gma-miR4994-3p, bdi-miR396a-5p, bdi-miR396b-5p, nta-miR6146b, mdm-miR7122a, mdm-miR7122b, bdi-miR7713-3p, bdi-miR7743-5p, bdi-miR7745-3p, bdi-miR7708b-3p, stu-miR7984c-5p, ata-miR396a-5p, ata-miR396d-5p, ata-miR396b-5p, ata-miR9776-3p
RLCK176 Os05g0110900 LOC_Os05g02020 OsJ_16858 P0016H04.10	19	mtr-miR319a-5p, smo-miR1112-5p, gma-miR1517, ppt-miR2085, mtr-miR1510b-3p, ath-miR2112-5p, aly-miR2112-5p, esi-miR3451-5p, gma-miR4377, hvu-miR5052, ath-miR5663-3p, osa-miR7692-5p, bdi-miR7711-5p.1, ptc-miR6459b, ptc-miR7832, stu-miR319a-5p, gra-miR7494e, gra-miR7494f, gra-miR8753
GXM2 At4g09990 T5L19.120	19	osa-miR444a-3p.2, osa-miR444b.2, osa-miR444c.2, osa-miR444d.2, osa-miR444e, osa-miR444f, ssp-miR444a, ssp-miR444b.2, ssp-miR444c-3p, zma-miR444a, zma-miR444b, stu-miR8046-5p, gra-miR8635, gra-miR8727, gra-miR8771a, gra-miR8771b, bdi-miR444b, bdi-miR444c, bdi-miR444d
GXM2 At4g09990 T5L19.120	19	ath-miR861-5p, ppt-miR1222d, ppt-miR1024a, ppt-miR1024b, aly-miR166g-5p, aly-miR853-3p, ahy-miR156b-3p, gma-miR166h-5p, bdi-miR5065, osa-miR5160, gma-miR166j-5p, ath-miR5645a, ath-miR5645b, ath-miR5645d, ath-miR5645f, ath-miR5645e, bdi-miR166i-5p, stu-miR166c-5p, gra-miR166d
	19	osa-miR821a, osa-miR821b, osa-miR821c, ath-miR826a, pta-miR390, tae-miR1122a, osa-miR2923, aly-miR402-3p, far-miR1122, ath-miR5025, mtr-miR5239, osa-miR5531, mtr-miR5555-5p, pde-miR390, bdi-miR7745-5p, gra-miR7502b, gra-miR7502c, gra-miR8739, gma-miR9759
	19	osa-miR2275a, osa-miR2275b, zma-miR2275a-3p, zma-miR2275d-3p, ghr-miR2949b, ghr-miR2949c, aly-miR773b-5p, aly-miR3441-3p.2, aly-miR3446-3p, csi-miR3954, gma-miR2118a-5p, gma-miR2118b-5p, esi-miR8630, bdi-miR2275a, bdi-miR2275c, tae-miR2275-3p, ata-miR2275a-3p, ata-miR2275b-3p, ata-miR2275c-3p
ELF5A-1 At1g13950 F16A14.17 F7A19.4	19	mtr-miR156g-5p, vvi-miR166a, vvi-miR166b, aly-miR165a-3p, aly-miR165b-3p, aly-miR399g-5p, aly-miR399h-5p, aly-miR399i-5p, gma-miR4387c, ath-miR5633, ptc-miR6459a-5p, cme-miR156e, mtr-miR399s-5p, mtr-miR399t-5p, ptc-miR7823, stu-miR8007b-5p, stu-miR8027, stu-miR8051-5p, sly-miR9475-3p
	19	ppt-miR1071-5p, smo-miR1093, tae-miR1137a, gma-miR1517, mtr-miR2639, mtr-miR2676a, mtr-miR2676b, mtr-miR2676c, mtr-miR2676d, mtr-miR2676e, mtr-miR2676f, ghr-miR3476-3p, aly-miR4243, osa-miR5509, osa-miR5515, nta-miR6158a, nta-miR6158b, nta-miR6158c, bdi-miR5174e-5p.2
EIF-5A2	19	ath-miR867, cre-miR919.1, cre-miR919.1, pta-miR156a, ppt-miR1223b, ppt-miR1223c, ppt-miR1223d, ppt-miR1051-3p, mtr-miR2087-5p, zma-miR408b-5p, vvi-miR3626-3p, osa-miR5519, mtr-miR5759, ghr-miR7498, stu-miR8008a, stu-miR8009, stu-miR8031, sly-miR9472-3p, ata-miR167c-3p
	19	ath-miR837-3p, smo-miR1112-5p, smo-miR1103-3p, gma-miR1527, osa-miR2105, osa-miR2875, aly-miR837-3p, aly-miR3436-5p, csi-miR3951, mtr-miR5205a, mtr-miR2593e, mtr-miR2593d, mtr-miR7701-3p, stu-miR8040-5p, stu-miR156g-3p, gra-miR8650, gra-miR7484e, sly-miR156e-3p, tae-miR9656-3p
	18	ptc-miR160h, ppt-miR160b, ppt-miR160c, ppt-miR160d, cre-miR909.2, ppt-miR160i, mtr-miR2587a, mtr-miR2587b, mtr-miR2587c, mtr-miR2587d, mtr-miR2587e, mtr-miR2587f, csi-miR160, gma-miR4343b, nta-miR160d, mes-miR160g, mes-miR160h, mtr-miR2587g
TIM14-1 At2g35795 T20F21.1	18	osa-miR168a-5p, sbi-miR168, sof-miR168a, sof-miR168b, zma-miR168a-5p, zma-miR168b-5p, ath-miR3434-3p, aly-miR4237, hvu-miR168-5p, bdi-miR168-5p, cme-miR168, ssp-miR168a, gma-miR5669, ptc-miR6443, bdi-miR7740-3p, gra-miR8663a, bdi-miR9491, ata-miR168-5p
RAP2-7 TOE1 At2g28550 T17D12.11	18	pta-miR156b, ppt-miR1223b, ppt-miR1223c, ppt-miR1223d, stu-miR399a-5p, stu-miR399b-5p, stu-miR399c-5p, stu-miR399d-5p, stu-miR399e-5p, stu-miR399f-5p, stu-miR399g-5p, stu-miR399h, stu-miR399j-5p, stu-miR399k-5p, stu-miR399l-5p, stu-miR399m-5p, stu-miR399n-5p, stu-miR399o-5p
AP2-1 AP2D23 RSR1 TOE1 LOC_Os05g03040 Os05g0121600 OsJ_16937 OSNPB_050121600	18	ath-miR1887, mtr-miR2086-5p, mtr-miR2652a, mtr-miR2652b, mtr-miR2652c, mtr-miR2652d, mtr-miR2652e, mtr-miR2652f, mtr-miR2652g, mtr-miR2652h, mtr-miR2652i, mtr-miR2652j, mtr-miR2652k, mtr-miR2652l, aly-miR4243, osa-miR5507, mtr-miR2652m, ptc-miR7831
CRR7 At5g39210 K3K3.10	18	osa-miR444a-3p.2, ath-miR831-5p, osa-miR444b.2, osa-miR444c.2, osa-miR444d.2, osa-miR444e, osa-miR444f, vvi-miR3631b-3p, hvu-miR444b, osa-miR5074, ssp-miR444a, ssp-miR444b.2, ssp-miR444c-3p, zma-miR444a, zma-miR444b, bdi-miR444b, bdi-miR444c, bdi-miR444d
CRR7 At5g39210 K3K3.10	18	osa-miR820a, osa-miR820b, osa-miR820c, ath-miR824-5p, ath-miR859, bol-miR824, bra-miR824, bna-miR824, mtr-miR1510b-3p, mtr-miR2592a-5p, aly-miR824-5p, aly-miR859-5p, hvu-miR6195, ddi-miR-7131b, gra-miR7504e, gra-miR7504f, sly-miR9469-3p, tae-miR9674a-5p
IRL7 Os03g0212200 LOC_Os03g11360 OsJ_09890	18	osa-miR444a-3p.2, ath-miR839-5p, osa-miR444d.2, osa-miR444e, gma-miR1521a, mtr-miR2614, ath-miR5026, ath-miR5655, ptc-miR6464, ghr-miR7502, bdi-miR7709-5p, rgl-miR7804-5p, ath-miR8178, gra-miR7502e, gra-miR7484h, gra-miR7484i, gra-miR7502f, bdi-miR444b
NAT6 At5g62890 MQB2.190 MQB2.21	18	ptc-miR478h, ptc-miR478i, ptc-miR478j, ptc-miR478k, ptc-miR478l, ptc-miR478m, ptc-miR478o, ptc-miR478q, ptc-miR478r, ptc-miR478s, ptc-miR478n, bgy-miR156, ath-miR5014a-3p, mtr-miR5249, hme-miR-2763, bdi-miR7732-3p, bra-miR9568-5p, ata-miR171b-5p
NAT6 At5g62890 MQB2.190 MQB2.21	18	ppt-miR319d-5p.2, ath-miR841a-5p, cre-miR1147.2, sly-miR397, mtr-miR2111e-3p, mtr-miR2653a, mtr-miR2653b, mtr-miR2653c, aly-miR3443-3p, mtr-miR167b-3p, stu-miR6026-3p, sly-miR6026, cca-miR6106-3p, lja-miR397, mtr-miR2653d, bdi-miR5181c-3p, bra-miR9408-3p, tae-miR9662b-3p
RDM1 At3g22680 MWI23.5	18	pta-miR159a, ppt-miR902j-5p, ppt-miR902k-5p, ppt-miR902l-5p, osa-miR1882a, osa-miR1882b, osa-miR1882c, osa-miR1882d, osa-miR1882e-5p, osa-miR1882f, osa-miR1882g, osa-miR1882h, gma-miR4994-3p, bdi-miR7773-5p, stu-miR7997a, stu-miR7997b, tae-miR9654b-3p, bra-miR172d-5p
RPS24B At5g28060 F15F15.130	18	osa-miR319a-3p.2-3p, osa-miR319b, sbi-miR319a, zma-miR319a-3p, zma-miR319c-3p, zma-miR319b-3p, zma-miR319d-3p, ath-miR833a-5p, smo-miR1091, sbi-miR319b, aly-miR161-3p.2, aly-miR4227, csi-miR3950, ath-miR5014a-3p, bdi-miR5165-5p, bdi-miR319b-3p, gra-miR167a, gra-miR167b
PAT04 At3g56930 F24I3.10	18	osa-miR827, zma-miR827-3p, aly-miR166g-5p, ahy-miR3520-5p, gma-miR4396, gma-miR166h-5p, bdi-miR827-3p, ssp-miR827, gma-miR166j-5p, osa-miR5492, osa-miR5544, bdi-miR7715-5p, stu-miR8050-3p, stu-miR166c-5p, esi-miR8623a, esi-miR8623d, gra-miR7494d, gra-miR8638
RBP47	18	sly-miR171c, gma-miR4368a, nta-miR171a, stu-miR7984d-5p, stu-miR399a-5p, stu-miR399b-5p, stu-miR399c-5p, stu-miR399d-5p, stu-miR399e-5p, stu-miR399f-5p, stu-miR399g-5p, stu-miR399h, stu-miR399j-5p, stu-miR399k-5p, stu-miR399l-5p, stu-miR399m-5p, stu-miR399n-5p, stu-miR399o-5p
Os01g0622700 LOC_Os01g43420 P0501G01.11	18	cre-miR1171, osa-miR1862a, osa-miR1862b, osa-miR1862c, osa-miR1875, osa-miR2093-5p, csi-miR857, osa-miR1862f, osa-miR1862g, mtr-miR5560-3p, mtr-miR5560-3p, ath-miR5636, osa-miR5824, ghr-miR7495a, ghr-miR7495b, gra-miR8786a, gra-miR8786b, gma-miR4348c
Os01g0622700 LOC_Os01g43420 P0501G01.11	18	osa-miR167d-3p, zma-miR167e-3p, osa-miR1432-5p, ptc-miR530b, osa-miR2094-5p, sbi-miR1432, zma-miR1432-5p, gma-miR4368b, bdi-miR167c-3p, ssp-miR1432, osa-miR5498, ssl-miR948, mtr-miR5225b, mtr-miR5225c, gma-miR390e, lja-miR7546, bdi-miR1432, ata-miR1432-5p
ABIL1 At2g46225 T3F17	18	zma-miR171a-5p, osa-miR2275a, osa-miR2275b, zma-miR2275a-3p, zma-miR2275d-3p, zma-miR169m-3p, pab-miR3709a, bdi-miR5178-3p, osa-miR2275d, stu-miR482d-3p, sly-miR482b, bdi-miR2275a, bdi-miR2275c, tae-miR2275-3p, tae-miR9679-5p, ata-miR2275a-3p, ata-miR2275b-3p, ata-miR2275c-3p
PAP2	18	ath-miR172d-5p, ath-miR417, osa-miR417, ppt-miR1053-3p, cre-miR1153-5p.1, osa-miR444f, csi-miR172a-5p, aly-miR172d-5p, vvi-miR3627-5p, bdi-miR5169a, ssp-miR444a, ssp-miR444b.2, pde-miR949a, lja-miR7528, bdi-miR159b-5p.2, stu-miR156f-3p, gra-miR7584e, bdi-miR5169b
PAP	18	zma-miR159a-5p, mtr-miR156g-5p, ppt-miR902i-3p, osa-miR1432-3p, bra-miR1885a, osa-miR2093-3p, esi-miR3465-5p, esi-miR3465-5p, aly-miR4231, bdi-miR5065, mtr-miR2629h, ath-miR5632-5p, cme-miR530b, cme-miR156e, sbi-miR6230-5p, bdi-miR159b-5p.1, bdi-miR5167b-3p, gra-miR8668
PAP	18	osa-miR319a-3p.2-3p, osa-miR319b, sbi-miR319a, zma-miR399a-5p, zma-miR399b-5p, zma-miR399d-5p, zma-miR319a-3p, zma-miR319c-3p, zma-miR319b-3p, zma-miR319d-3p, ath-miR773a, ath-miR840-3p, sbi-miR319b, zma-miR399i-5p, aly-miR848-3p, bdi-miR319b-3p, mtr-miR5556-5p, stu-miR5303e
MOS1 At4g24680 F22K18.120	18	ath-miR156f-3p, osa-miR156b-3p, osa-miR426, ath-miR829-5p, mtr-miR156b-3p, mtr-miR156c-3p, aly-miR156d-3p, aly-miR156e-3p, aly-miR156f-3p, aly-miR862-5p, cca-miR6103-5p, sbi-miR5568g-5p, bdi-miR156i-3p, gra-miR8778, bra-miR156a-3p, bra-miR156b-3p, bra-miR156d-3p, ata-miR156e-3p
	18	osa-miR171g, sbi-miR171c, zma-miR171g-3p, tae-miR1121, osa-miR2921, aly-miR169c-3p, aly-miR169c-3p, aly-miR399f-5p, aly-miR829-5p, osa-miR812p, osa-miR812p, ptc-miR828b-3p, ghr-miR7509, lja-miR7519, gra-miR7494d, tae-miR9654a-3p, tae-miR9654b-3p, gma-miR9739
PFC1 DIM1C At1g01860 F22M8.1 T1N6.27	18	ptc-miR477a-5p, ptc-miR477b, ppt-miR477c, ppt-miR477a-5p, ppt-miR477d, ppt-miR477e, ppt-miR477h, ppt-miR477b, vvi-miR477a, osa-miR2118e, osa-miR2118o, osa-miR2118r, ghr-miR2949b, ghr-miR2949c, sbi-miR6221-3p, sbi-miR6232a-3p, mes-miR477f, mes-miR477g
CAS At2g46520 F11C10 F13A10.5	18	cre-miR906-5p, sly-miR397, ptc-miR6460, mdm-miR397a, mdm-miR397b, sbi-miR5568c-3p, mes-miR397, stu-miR7988, stu-miR397-5p, gra-miR7494c, gma-miR9746a, gma-miR9746b, gma-miR9746c, gma-miR9746d, gma-miR9746e, gma-miR9746f, gma-miR9746g, gma-miR9746h
PMP22 At4g04470 T26N6.9	18	ppt-miR536f, osa-miR810b.2, aqc-miR167, zma-miR395o-5p, aly-miR829-5p, aly-miR3449-5p, pab-miR3696, pab-miR3706, mtr-miR5264, gma-miR5679, cme-miR167e, lja-miR7545, bdi-miR7740-3p, bdi-miR7723b-5p, stu-miR8003, gra-miR7492l, gra-miR7492m, ata-miR160a-3p
TMN2 EMP8 At1g14670 F10B6.2/F10B6.3 T5E21.15	18	ath-miR160c-3p, ath-miR863-5p, ath-miR774b-3p, esi-miR3460-3p, aly-miR4226, osa-miR5338, cca-miR6107, hme-miR-133, han-miR3440, mtr-miR7696a-5p, mtr-miR7696b-5p, mtr-miR7696d-5p, bdi-miR5163b-5p, bdi-miR7783-5p, bra-miR9567-3p, tae-miR9659-3p, gma-miR9740, ata-miR395e-5p
TMN3 EMP9 At2g01970 F14H20.4	18	ath-miR390a-3p, ptc-miR390d-3p, gma-miR390a-3p, aly-miR169d-3p, aly-miR169e-3p, aly-miR169g-3p, aly-miR390a-3p, aly-miR399a-5p, gma-miR390c, osa-miR5544, hvu-miR6195, ghr-miR7485, mes-miR390, lja-miR390a-3p, lja-miR390b-3p, sly-miR390a-3p, sly-miR390b-3p, bra-miR390-3p
MAPKKK3 MAP3KA At1g53570 F22G10.18 T3F20.12	18	osa-miR1319a, mtr-miR2585a, mtr-miR2585b, mtr-miR2585c, mtr-miR2585d, ghr-miR399c, aly-miR844-5p, esi-miR3457-5p, osa-miR5071, gma-miR5368, ath-miR5999, stu-miR6026-3p, sly-miR6026, ptc-miR6466-3p, cme-miR399d, cme-miR399e, rgl-miR7797b, gra-miR3476
	18	ppt-miR533b-3p, ath-miR829-3p.2, cre-miR1160.2, ath-miR2933a, ath-miR2933b, bdi-miR169i, gma-miR169j-5p, gma-miR169k, gma-miR169l-5p, hbr-miR396a, ptc-miR6468-5p, sbi-miR6231-5p, mes-miR169l, mes-miR169m, cpa-miR169, ath-miR8171, gra-miR8669, tae-miR9669-5p
B'ETA At3g26020 MPE11.19	18	mdm-miR482a-5p, aly-miR169h-3p, aly-miR169j-3p, aly-miR169k-3p, aly-miR169l-3p, gma-miR4399, bdi-miR169e-3p, mtr-miR2592bi, mtr-miR2592bj, mtr-miR2592bk, ath-miR5637, nta-miR6020b, hme-miR-6310-3p, bdi-miR7745-3p, bdi-miR7752-3p, stu-miR8039, gra-miR8642, ata-miR169i-3p
GRP-2	18	mtr-miR171a, ppt-miR536a, ppt-miR536b, ppt-miR536d, ppt-miR536e, ppt-miR1046-5p, cre-miR1159.2, mtr-miR2628, aly-miR781-3p, vvi-miR3625-3p, osa-miR5153, cca-miR6108e-5p, ptc-miR6443, bdi-miR167e-3p, gra-miR8729, gra-miR8786a, gra-miR8786b, ata-miR167b-3p
PEX22 At3g21865 MSD21.24	18	cre-miR1143-3p, aqu-miR-2020-3p, mtr-miR2118, osa-miR1863b, aly-miR4226, gma-miR862a, aau-miR160, osa-miR5536, mtr-miR2592bl-5p, sbi-miR5565f, hme-miR-2767, mtr-miR2592bp-3p, ptc-miR7829, gra-miR8702, gra-miR8762b, gra-miR8785, gra-miR8762c, bra-miR9568-5p
PEX22 At3g21865 MSD21.24	18	ptc-miR398c-5p, pta-miR156a, mtr-miR2670a, mtr-miR2670b, mtr-miR2670c, mtr-miR2670d, osa-miR2879, aly-miR858-3p, aly-miR3448-5p, esi-miR3467-5p, mtr-miR5276, mtr-miR2600b, mtr-miR2600c, mtr-miR2600d, gma-miR5667-3p, mtr-miR5759, cpa-miR8145, bra-miR9563a-3p
NAC086 At5g17260 MKP11.11	18	ath-miR396b-3p, osa-miR396c-3p, cre-miR1152, cre-miR1168.1, mtr-miR1507-5p, osa-miR2868, osa-miR2871a-3p, osa-miR2871b, zma-miR396f-3p, aly-miR396b-3p, ath-miR5029, bdi-miR396e-3p, mtr-miR5278, cca-miR396c, ptc-miR6460, bra-miR396-3p, gma-miR9726, ata-miR396c-3p
NAC086 At5g17260 MKP11.11	17	ppt-miR1023a-3p, osa-miR1846a-5p, osa-miR1846b-5p, aqu-miR-2015-3p, osa-miR1846c-5p, ctr-miR171, aly-miR837-3p, gma-miR4414-3p, gma-miR171m, gma-miR171n, gma-miR171p, gma-miR171t, osa-miR6250, mdm-miR171a, mdm-miR171b, stu-miR171b-3p, sly-miR171e
At4g36750 C7A10.610	17	ath-miR170-5p, ath-miR171a-5p, osa-miR2101-5p, osa-miR2121a, osa-miR2121b, aly-miR170-5p, aly-miR171a-5p, hme-miR-2788-5p, mtr-miR5250, gma-miR171j-5p, nta-miR6145c, hvu-miR6189, bdi-miR7717b-5p, ptc-miR7839, stu-miR8041a-3p, stu-miR171a-5p, stu-miR171c-5p
At4g36750 C7A10.610	17	osa-miR439a, osa-miR439b, osa-miR439c, osa-miR439d, osa-miR439e, osa-miR439f, osa-miR439g, osa-miR439h, osa-miR439i, osa-miR1439, mtr-miR2616, mtr-miR2653a, mtr-miR2653b, mtr-miR2653c, mtr-miR5240, hme-miR-6305-3p, mtr-miR2653d
At4g36750 C7A10.610	17	ppt-miR902c-3p, ppt-miR902c-3p, ppt-miR902e-3p, ppt-miR902e-3p, ppt-miR902f-3p, ppt-miR902f-3p, ppt-miR902g-3p, ppt-miR902g-3p, mtr-miR2679a, mtr-miR2679b, mtr-miR2679c, aly-miR399f-5p, gso-miR2109, gso-miR2109, bdi-miR5180b, bdi-miR5180a, stu-miR8049-3p
At4g36750 C7A10.610	17	ppt-miR1223b, ppt-miR1223c, ppt-miR1223d, stu-miR399a-5p, stu-miR399b-5p, stu-miR399c-5p, stu-miR399d-5p, stu-miR399e-5p, stu-miR399f-5p, stu-miR399g-5p, stu-miR399h, stu-miR399j-5p, stu-miR399k-5p, stu-miR399l-5p, stu-miR399m-5p, stu-miR399n-5p, stu-miR399o-5p
UBP12 At5g06600 F15M7.13	17	ath-miR414, ath-miR414, ath-miR414, osa-miR414, osa-miR414, osa-miR414, ath-miR864-3p, ppt-miR1028c-3p, gma-miR4352b, gma-miR4372b, cca-miR6105b, bdi-miR7753-5p, gra-miR8657a, gra-miR8657c, gra-miR8657d, gra-miR8657e, gra-miR8657b
SCL28 At5g18810 F17K4.60	17	ath-miR402, zma-miR319a-5p, zma-miR319c-5p, ppt-miR1222a, mtr-miR319b-5p, ppt-miR1222b, ppt-miR1222c, ppt-miR1222e, pvu-miR159a.2, aly-miR319b-5p, gma-miR396f, bdi-miR5181b, bdi-miR319b-5p, mtr-miR319d-5p, bdi-miR5181c-5p, sly-miR319c-5p, bra-miR9555a-5p
ARF17 At1g77850 F28K19.6 T32E8.16	17	mtr-miR2659a, mtr-miR2659b, mtr-miR2659c, mtr-miR2659d, mtr-miR2659e, mtr-miR2659f, vvi-miR3623-5p, mtr-miR5286a, osa-miR5519, gma-miR5775, cca-miR6103-5p, nta-miR6144, mtr-miR2659g, mtr-miR2659h, mtr-miR2659i, mtr-miR2659j, mtr-miR2659k
ATXR2 SDG36 SET36 At3g21820 MSD21.13	17	osa-miR166c-5p, osa-miR166g-5p, zma-miR160d-3p, zma-miR166h-5p, zma-miR166l-5p, osa-miR1439, osa-miR1865-3p, aly-miR166f-5p, ath-miR4228-3p, osa-miR5161, bdi-miR5173-5p, gma-miR166i-5p, cme-miR858, bdi-miR7772-3p, stu-miR166d-5p, aly-miR166h-5p, ata-miR166b-5p
IRL5 Os10g0572300 LOC_Os10g42190 OsJ_32547 OSJNBa0095C07.8	17	aly-miR831-5p, ath-miR5021, ath-miR5021, bdi-miR5200c, mtr-miR5293, sbi-miR5383, gma-miR5673, sbi-miR6229-3p, lja-miR7531, bdi-miR7775-3p, ath-miR8167a, ath-miR8167b, ath-miR8167c, tae-miR5049-3p, ath-miR8167d, ath-miR8167e, ath-miR8167f
SAG21 LEA38 LEA5 At4g02380 T14P8.2	17	osa-miR166i-5p, zma-miR393a-3p, aly-miR166g-5p, esi-miR3454c-3p, gma-miR166h-5p, gma-miR166j-5p, pti-miR5480, mtr-miR2592bl-5p, bna-miR860, hvu-miR5049c, hme-miR-6306-5p, sbi-miR6225-5p, mtr-miR397-3p, bdi-miR5174e-5p.1, bdi-miR5174b-5p, stu-miR166c-5p, bra-miR860-3p
GAUT7 JS33 LGT7 At2g38650 T6A23.15	17	ptc-miR480, ath-miR776, ath-miR852, ppt-miR1061-5p, osa-miR1429-5p, osa-miR1882e-3p, aly-miR852-3p, gma-miR1507c-3p, bdi-miR5181a-5p, osa-miR5485, mtr-miR5561-5p, ath-miR833b, bra-miR5712, mtr-miR5742, hvu-miR5049b, tae-miR5048-5p, tae-miR9779
At3g50210 F11C1.50	17	ath-miR778, smo-miR1105, cre-miR1145.1, mtr-miR2648, zma-miR395o-5p, esi-miR3460-3p, esi-miR3456-5p, aly-miR4223, gma-miR4381, mtr-miR5249, gma-miR4401b, mtr-miR5758, nta-miR6145a, cme-miR171i, sbi-miR5565g-5p, lja-miR7517, bra-miR9555b-5p
At3g50210 F11C1.50	17	cre-miR915, pta-miR1314, zma-miR2118e, aly-miR3447-5p, ahy-miR3510, ahy-miR3511-5p, ahy-miR3517, gma-miR4342, mtr-miR5562-3p, gma-miR5777, bna-miR6029, ptc-miR6460, ghr-miR160, stu-miR172e-5p, gra-miR7502b, gra-miR7502c, bra-miR9558-3p
LNG1 TRM2 At5g15580 T20K14.190	17	mtr-miR319a-5p, aly-miR319b-5p, aly-miR319b-5p, esi-miR3465-5p, gma-miR5039, mtr-miR5267b, mtr-miR5267c, mtr-miR5267d, mtr-miR5267e, mtr-miR5267f, mtr-miR5267g, mtr-miR5267k, mtr-miR5267m, gma-miR169n-3p, stu-miR167b-3p, stu-miR167a-3p, bra-miR9554-5p
At1g76660 F28O16.3	17	ath-miR170-5p, ath-miR171a-5p, pta-miR166c, cre-miR1153-5p.1, crt-miR166a, csi-miR166b, aly-miR165a-3p, aly-miR165b-3p, aly-miR170-5p, aly-miR171a-5p, aly-miR4241, far-miR166, gma-miR171j-5p, ath-miR5654-5p, mes-miR166h, stu-miR171a-5p, stu-miR171c-5p
	17	ptc-miR172i, mtr-miR172a, pta-miR166c, bdi-miR172d, sbi-miR172f, crt-miR166a, csi-miR166b, ghr-miR172, aly-miR165a-3p, aly-miR165b-3p, aly-miR4241, far-miR166, tcc-miR172d, mtr-miR482-5p, mes-miR166h, ptc-miR7827, gra-miR8771f
UBC9 UBC4B At4g27960 T13J8.70	17	osa-miR416, mtr-miR2647a, mtr-miR2647b, mtr-miR2647c, aly-miR3448-5p, esi-miR3454a-5p, esi-miR3454c-5p, esi-miR3454b-5p, esi-miR3454e-5p, bgy-miR529, bcy-miR529, bdi-miR156b-3p, bdi-miR5200c, bdi-miR167e-3p, stu-miR7122-3p, bdi-miR9487, ata-miR167b-3p
	17	osa-miR416, mtr-miR2647a, mtr-miR2647b, mtr-miR2647c, aly-miR3448-5p, esi-miR3454a-5p, esi-miR3454c-5p, esi-miR3454b-5p, esi-miR3454e-5p, bgy-miR529, bcy-miR529, bdi-miR156b-3p, bdi-miR5200c, bdi-miR167e-3p, stu-miR7122-3p, bdi-miR9487, ata-miR167b-3p
COP1 At2g32950 T21L14.11	17	osa-miR156c-3p, osa-miR156g-3p, zma-miR156a-3p, ath-miR865-3p, ppt-miR1027a, ppt-miR1027b, osa-miR1874-5p, gma-miR4350, gma-miR5675, bdi-miR156e-3p, bdi-miR7754-3p, stu-miR8038a-3p, stu-miR8038b-3p, gra-miR7504k, gra-miR7504l, gra-miR7504m, ata-miR156b-3p
SNL3 SIN3 At1g24190 F3I6.12	17	ath-miR835-5p, aqu-miR-2019-3p, mtr-miR2656a, mtr-miR2656b, aly-miR835-5p, mtr-miR5557-5p, gma-miR5777, osa-miR5837.1, nta-miR6025c, ptc-miR6454, lja-miR7542, mtr-miR2656c, mtr-miR2656d, mtr-miR2656e, bdi-miR5174c-5p, rgl-miR7799, ata-miR167c-3p
SNL3 SIN3 At1g24190 F3I6.12	17	osa-miR396e-5p, zma-miR396c, zma-miR396d, osa-miR2120, sbi-miR396d, sbi-miR396e, vvi-miR3623-5p, far-miR396, bdi-miR396a-5p, bdi-miR396b-5p, gma-miR169n-3p, nta-miR6144, hme-miR-71, ptc-miR6431, ata-miR396a-5p, ata-miR396d-5p, ata-miR396b-5p
SNL3 SIN3 At1g24190 F3I6.12	17	ath-miR165a-5p, ath-miR166e-5p, osa-miR166a-5p, osa-miR166c-5p, osa-miR166e-5p, zma-miR166b-5p, zma-miR166d-5p, osa-miR1428b, osa-miR1428c, osa-miR1428d, aly-miR166e-5p, aly-miR3448-5p, esi-miR3466-3p, bdi-miR166c-5p, osa-miR812v, ath-miR8177, ata-miR166a-5p
SNL3 SIN3 At1g24190 F3I6.12	17	ath-miR172d-5p, ath-miR393a-3p, ath-miR393b-3p, ptc-miR393a-3p, ptc-miR393b-3p, aly-miR172d-5p, aly-miR393a-3p, aly-miR393b-3p, tae-miR167b, mtr-miR5275, osa-miR5497, osa-miR5812, gma-miR393c-3p, mdm-miR393d, mdm-miR393e, mdm-miR393f, stu-miR172c-5p
SNL1 At3g01320 T22N4.5	17	mtr-miR2647a, mtr-miR2647b, mtr-miR2647c, mtr-miR5272f, gma-miR5368, hme-miR-2797, pde-miR3704a, cme-miR399g, sbi-miR5568e-3p, sbi-miR6233-5p, stu-miR1886a, stu-miR1886b, stu-miR1886c, stu-miR1886d, stu-miR1886e, stu-miR1886f, sly-miR156e-5p
At3g59020 F17J16.70	17	ath-miR172b-5p, ath-miR172e-5p, ath-miR834, ath-miR834, cre-miR1154-5p, cre-miR1154-5p, bra-miR172b-5p, mtr-miR2600a, mtr-miR2667a, aly-miR172e-5p, aly-miR834-3p, aly-miR834-3p, pab-miR3694, gma-miR5368, mtr-miR2667b, bdi-miR159b-5p.3, gra-miR8648
RABC2A RAB18B At5g03530 F12E4.310	17	ath-miR172b-5p, ath-miR172e-5p, cre-miR1154-5p, cre-miR1154-5p, gma-miR1520a, mtr-miR2089-3p, bra-miR172b-5p, mtr-miR2600a, mtr-miR2667a, aly-miR172e-5p, pab-miR3694, bdi-miR5064, gma-miR5368, mtr-miR2667b, bdi-miR159b-5p.3, gra-miR8648, ata-miR9674b-3p
At5g27470 F21A20_180	17	ath-miR828, vvi-miR828a, aly-miR828-5p, gma-miR4364b, ssl-miR828, gma-miR828a, gma-miR828b, nta-miR6148b, ptc-miR828a, ptc-miR828b-5p, mdm-miR828a, mdm-miR828b, cme-miR828, mes-miR828a, mes-miR828b, bdi-miR7741-3p.2, stu-miR398b-5p
DVR	17	osa-miR156l-5p, osa-miR156l-5p, ath-miR838, cre-miR918, ppt-miR1025, mtr-miR2597, bdi-miR5167a-3p, cca-miR156b, cca-miR156b, hci-miR156a, hci-miR156a, mdm-miR7124a, mdm-miR7124a, mdm-miR7124b, mdm-miR7124b, bdi-miR166i-5p, stu-miR8044-5p
	17	ath-miR166a-5p, ath-miR166b-5p, ath-miR399a, mtr-miR399c, zma-miR166k-5p, mtr-miR399h, mtr-miR399i, mtr-miR399k, ghr-miR399d, aly-miR166b-5p, aly-miR166g-5p, aly-miR399f-3p, gma-miR166h-5p, gma-miR166j-5p, cca-miR399, hme-miR-285, stu-miR166c-5p
SPDSYN1 Os07g0408700 LOC_Os07g22600 OsJ_23928 P0492E07.108	17	ath-miR415, zma-miR172d-5p, zma-miR172b-5p, zma-miR172c-5p, ptc-miR172b-5p, ptc-miR172g-5p, ptc-miR172h-5p, ppt-miR1217-5p, ath-miR823, aly-miR172c-5p, aly-miR823-3p, gma-miR4385, osa-miR3981-5p, osa-miR5080, stu-miR172a-5p, stu-miR172d-5p, aly-miR172f-5p
4CLL1 Os03g0152400 LOC_Os03g05780	17	ath-miR393a-3p, ath-miR1886.3, ptc-miR171c, ptc-miR171d, ptc-miR171k, ath-miR824-3p, mtr-miR171e-3p, cre-miR1149.2, rco-miR171g, aly-miR393a-3p, aly-miR824-3p, tcc-miR171b, tcc-miR171c, bdi-miR5179, osa-miR5179, mes-miR171e, mes-miR171f
4CLL1 Os03g0152400 LOC_Os03g05780	17	osa-miR816, ath-miR830-3p, ath-miR853, osa-miR2096-3p, sbi-miR821b, esi-miR3450-3p, gma-miR4405, tae-miR5085, gma-miR5376, osa-miR5494, sly-miR6027-5p, cca-miR6108a, cca-miR6108g, cca-miR6108b, sbi-miR6228-3p, ath-miR8174, tae-miR9673-5p
	17	osa-miR528-3p, osa-miR1870-5p, ppt-miR2084, mtr-miR2645, aly-miR156g-3p, ahy-miR3513-5p, mtr-miR5212-3p, stu-miR482b-5p, stu-miR482e-5p, hbr-miR2118, hme-miR-14, ptc-miR6475, bdi-miR7709-5p, ath-miR8170-3p, sly-miR9473-5p, tae-miR9679-5p, ata-miR9672-5p
NFYB3 HAP3C At4g14540 dl3310w FCAALL.252	17	ath-miR780.2, ppt-miR1031a, ppt-miR1031b, ppt-miR1067, vvi-miR172b, gma-miR1521a, aly-miR860-5p, mtr-miR5554a-3p, mtr-miR5554b-3p, mtr-miR5554c-3p, gma-miR171r, gma-miR171s, osa-miR1440b, sbi-miR6232b-5p, mtr-miR7698-3p, rgl-miR7803b-3p, bra-miR860-5p
NFYB8 HAP3I Os03g0413000 LOC_Os03g29970	17	ath-miR172b-5p, ath-miR172e-5p, osa-miR172d-5p, zma-miR172c-5p, bra-miR172b-5p, aly-miR172b-5p, aly-miR172e-5p, ath-miR5016, bdi-miR172a-5p, mtr-miR5266, mtr-miR5266, gma-miR172g, stu-miR172b-5p, ath-miR8175, ath-miR8175, ata-miR172a-5p, ata-miR172b-5p
GLTP1 At2g33470 F4P9.24	17	mtr-miR169d-5p, gma-miR169c, vvi-miR169b, vvi-miR169h, vvi-miR169l, osa-miR2092-5p, mtr-miR169k, aly-miR167d-3p, vvi-miR3626-3p, gma-miR5041-3p, ath-miR5636, gma-miR169o, gma-miR169r, gma-miR169s, gma-miR169u, osa-miR5792, bdi-miR166i-5p
MHZ4 Os01g0128300 LOC_Os01g03750 P0408F06.3	17	osa-miR396e-5p, tae-miR1131, ddi-miR-1177, far-miR396, gma-miR4994-3p, bdi-miR396a-5p, bdi-miR396b-5p, mdm-miR7122a, mdm-miR7122b, bdi-miR7713-3p, bdi-miR7743-5p, bdi-miR7745-3p, bdi-miR7708b-3p, stu-miR7984c-5p, ata-miR396a-5p, ata-miR396d-5p, ata-miR396b-5p
MSH6 AGAA.3 MSH6-1 At4g02070 T10M13.8	17	osa-miR396e-5p, zma-miR396c, zma-miR396d, sbi-miR396e, osa-miR396g, osa-miR396h, osa-miR396d, vvi-miR477b-3p, far-miR396, bdi-miR396a-5p, bdi-miR396b-5p, gma-miR5678, bra-miR5719, gma-miR9737, ata-miR396a-5p, ata-miR396d-5p, ata-miR396b-5p
TSS At4g28080 T13J8.190	17	mtr-miR169e-5p, vvi-miR169y, vvi-miR169m, vvi-miR169p, vvi-miR169n, vvi-miR169q, esi-miR3452-5p, bdi-miR5184, mdm-miR169c, mdm-miR169d, cme-miR858, mes-miR169r, mes-miR169t, mes-miR169v, mes-miR169x, mes-miR169z, bdi-miR7712-5p
BAM9 BMY3 At5g18670 T1A4.50	17	mtr-miR156g-5p, ppt-miR902b-5p, pta-miR166c, ppt-miR902c-5p, ppt-miR902d-5p, ppt-miR902e-5p, ppt-miR902f-5p, ppt-miR902g-5p, ppt-miR1058, osa-miR2874, gar-miR2947, far-miR166, ath-miR5633, hbr-miR156, cme-miR156e, stu-miR8027, stu-miR8051-5p
BAM9 BMY3 At5g18670 T1A4.50	17	mtr-miR156g-5p, vvi-miR166b, aly-miR165a-3p, aly-miR165b-3p, aly-miR399g-5p, aly-miR399h-5p, aly-miR399i-5p, gma-miR4387c, ath-miR5633, nta-miR6163, hbr-miR166a, cme-miR156e, mtr-miR399s-5p, mtr-miR399t-5p, stu-miR8007b-5p, stu-miR8027, stu-miR8051-5p
Os04g0338000 LOC_Os04g26910 OsJ_14315 OSJNBa0008A08.11 OSJNBa0032I19.2	17	ath-miR397b, zma-miR166k-5p, bna-miR397a, bna-miR397b, ptc-miR530b, osa-miR1857-3p, osa-miR2092-3p, sbi-miR396d, osa-miR2867-5p, zma-miR166n-5p, csi-miR530b, ath-miR5640, bna-miR2111c, gra-miR7492e, gra-miR7492f, sly-miR9472-3p, bra-miR2111-5p
Os03g0329200 LOC_Os03g21160	17	osa-miR160a-3p, osa-miR160b-3p, osa-miR160d-3p, osa-miR169p, zma-miR160a-3p, zma-miR160b-3p, mtr-miR168a, zma-miR160g-3p, aly-miR853-5p, bdi-miR160a-3p, bdi-miR160b-3p, bdi-miR160c-3p, sbi-miR5565f, gma-miR2111a, gma-miR2111d, gma-miR169t, ata-miR160c-3p
PSB27-2 LPA19 At1g05385 T25N20.4	17	zma-miR395b-5p, zma-miR395c-5p, osa-miR2092-5p, zma-miR395f-5p, zma-miR395i-5p, osa-miR5150-5p, bdi-miR395c-5p, bdi-miR395g-5p, bdi-miR395h-5p, bdi-miR395k-5p, bdi-miR395l-5p, bdi-miR395n-5p, lja-miR7539, bdi-miR395o-5p, bdi-miR395p-5p, ata-miR395e-5p, ata-miR395b-5p
ROC5 GL2-5 Os02g0674800 LOC_Os02g45250 OsJ_07908 P0657H12.28	17	gma-miR1512a-5p, mtr-miR2655a, mtr-miR2655c, mtr-miR2655d, mtr-miR2655e, mtr-miR2655f, mtr-miR2655g, mtr-miR2655h, mtr-miR2655i, mtr-miR2655j, mtr-miR2655k, mtr-miR2655l, mtr-miR2655m, mtr-miR2655n, mtr-miR2655o, ptc-miR6462c-5p, sbi-miR6219-3p
	17	ppt-miR902c-3p, ppt-miR902e-3p, ppt-miR902g-3p, ath-miR841b-5p, aly-miR4250, osa-miR5073, bdi-miR169i, bdi-miR395d-5p, bdi-miR395j-5p, mtr-miR5259, gma-miR5774a, gma-miR5774b, nta-miR6145f, hvu-miR6191, mtr-miR2592bo-5p, stu-miR8015-3p, stu-miR8001b-5p
CAB13 LHBC1	17	ath-miR168a-3p, ptc-miR168a-3p, ptc-miR168b-3p, aqu-miR-2019-3p, mtr-miR2589, aly-miR168a-3p, tcc-miR535, mtr-miR168c-3p, ath-miR858b, hvu-miR6198, osa-miR6253, sly-miR168b-3p, lja-miR7531, stu-miR8046-3p, sly-miR9478-3p, bra-miR168b-3p, bra-miR168c-3p
CAB13 LHBC1	16	ath-miR472-3p, bna-miR1140, vvi-miR482, aqc-miR482a, aqc-miR482b, aqc-miR482c, gra-miR482, aly-miR472-3p, aly-miR3434-3p, pab-miR482c, bra-miR1140, hme-miR-6307-3p, ptc-miR482c-3p, pde-miR482a, gra-miR8753, bdi-miR2118a
CYP72A15 At3g14690 MIE1.20	16	ptc-miR472a, pta-miR482a, pta-miR482b, osa-miR1859, mdm-miR482a-3p, vvi-miR3633b-3p, pab-miR482a, csi-miR482a-3p, csi-miR482c, stu-miR482c, cca-miR6118-3p, pde-miR482b, mdm-miR482c, mes-miR482, gra-miR482d, sly-miR482d-3p
petB	16	osa-miR166c-5p, ppt-miR902a-3p, ppt-miR902b-3p, ppt-miR902c-3p, ppt-miR902e-3p, ppt-miR902g-3p, cre-miR1145.1, aly-miR842-5p, gma-miR5038a, gma-miR5038b, ath-miR5665, bna-miR6029, hme-miR-6306-3p, pde-miR396, cpa-miR8140, gra-miR167c
PIX13 KIN3 At2g17220	16	osa-miR166b-5p, ath-miR420, zma-miR166a-5p, ppt-miR1222a, ppt-miR1222b, ppt-miR1222c, ppt-miR1222d, esi-miR3469-3p, hvu-miR5049a, bdi-miR166b-5p, osa-miR5542, gma-miR5782, ptc-miR6435, bdi-miR159b-5p.2, ptc-miR7814, ata-miR166d-5p
TIM50 EMB1860 At1g55900 F14J16.15	16	zma-miR159b-5p, osa-miR1860-3p, sbi-miR1435b, osa-miR2877, zma-miR159j-5p, zma-miR159k-5p, aly-miR319a-5p, esi-miR3457-5p, gma-miR4399, mtr-miR5234, gma-miR1512b, bra-miR5716, nta-miR6162, osa-miR7693-3p, bdi-miR9484, bra-miR319-5p
RPL3A At2g43030 MFL8.11	16	osa-miR319a-3p.2-3p, osa-miR319b, sbi-miR319a, zma-miR319a-3p, zma-miR319c-3p, zma-miR319b-3p, zma-miR319d-3p, gma-miR159b-3p, gma-miR159c, sbi-miR319b, mtr-miR2586b, mtr-miR159b, gma-miR159f-3p, mtr-miR5562-3p, rgl-miR5574, sbi-miR6225-3p
Os01g0870100 LOC_Os01g64980 P0039A07.9 P0677H08.41	16	ppt-miR1053-5p, osa-miR1879, mtr-miR2088-3p, pab-miR3699, pab-miR395, gma-miR4378a, bdi-miR5065, osa-miR5522, osa-miR5542, hbr-miR6166, hme-miR-2767, stu-miR7991a, stu-miR7991b, stu-miR7991c, gra-miR167c, gma-miR9742
RPPL1 At3g14470 MOA2.9	16	mtr-miR2659a, mtr-miR2659b, mtr-miR2659c, mtr-miR2659d, mtr-miR2659e, mtr-miR2659f, vvi-miR3623-5p, mtr-miR5286a, osa-miR5519, gma-miR5775, cca-miR6103-5p, mtr-miR2659g, mtr-miR2659h, mtr-miR2659i, mtr-miR2659j, mtr-miR2659k
	16	pta-miR951, cre-miR1160.1, mtr-miR2111d-3p, aly-miR163-5p.2, aly-miR3438-5p, pab-miR3707, pab-miR951, ath-miR5028, mtr-miR2111l, mtr-miR2111a-3p, gma-miR2111a, gma-miR2111d, hbr-miR6167, hvu-miR6204, pde-miR951, ghr-miR7511
RNP1 At4g14300 dl3190w FCAALL.156	16	ath-miR161.2, ath-miR773a, ath-miR861-5p, mtr-miR2642, osa-miR2923, aly-miR161-5p.2, aly-miR861-5p, ssp-miR437b, mtr-miR5554a-5p, mtr-miR5554b-5p, mtr-miR5554c-5p, osa-miR6251, ptc-miR6467, osa-miR7693-5p, ath-miR8182, tae-miR9664-3p
PHT4;4 Os09g0570400 LOC_Os09g39680 OJ1003_C09.34 OsJ_30419	16	ath-miR858a, ath-miR858a, pta-miR950a, pta-miR950b, aly-miR858-5p, aly-miR858-5p, pab-miR3698, gma-miR5776, hme-miR-305, ptc-miR6464, cme-miR858, stu-miR8032a-3p, stu-miR8032b-3p, stu-miR8032e-3p, stu-miR8032f-3p, stu-miR8032g-3p
PHT4;4 Os09g0570400 LOC_Os09g39680 OJ1003_C09.34 OsJ_30419	16	osa-miR443, gma-miR4415a-3p, gma-miR4415b-3p, nta-miR399a, nta-miR399b, nta-miR399c, nta-miR399d, nta-miR399e, nta-miR399f, nta-miR399g, stu-miR399j-3p, stu-miR399k-3p, stu-miR399l-3p, stu-miR399m-3p, stu-miR399n-3p, stu-miR399o-3p
ATG7 APG7 PEUP4 At5g45900 K15I22.10	16	osa-miR443, gma-miR4415a-3p, gma-miR4415b-3p, nta-miR399a, nta-miR399b, nta-miR399c, nta-miR399d, nta-miR399e, nta-miR399f, nta-miR399g, stu-miR399j-3p, stu-miR399k-3p, stu-miR399l-3p, stu-miR399m-3p, stu-miR399n-3p, stu-miR399o-3p
RPH1	16	osa-miR167c-3p, zma-miR399c-5p, ptc-miR166p, ptc-miR472b, aly-miR3433-3p, gma-miR1520r, hvu-miR6209, ptc-miR6459b, stu-miR7997a, stu-miR7997b, stu-miR5303g, stu-miR5303h, stu-miR5303i, ath-miR8175, gra-miR8635, ata-miR167e-3p
SKIP11 At2g02870 T17M13.4	16	osa-miR156c-3p, osa-miR156g-3p, ath-miR391-5p, osa-miR810a, ppt-miR1046-5p, gma-miR482a-5p, zma-miR2118e, aly-miR319a-5p, aly-miR391-5p, aly-miR4234, ath-miR5998a, ath-miR5998b, bdi-miR156e-3p, bra-miR319-5p, bra-miR391-5p, ata-miR156d-3p
SKIP11 At2g02870 T17M13.4	16	ath-miR166a-5p, ath-miR166b-5p, osa-miR166a-5p, osa-miR166e-5p, osa-miR166l-5p, zma-miR166b-5p, zma-miR166d-5p, aly-miR166b-5p, aly-miR4243, bdi-miR166c-5p, ptc-miR3627a, bdi-miR7768a-5p, bdi-miR7768b-5p, gra-miR8683, ata-miR166a-5p, ata-miR5168-5p
PCMP-E36 At4g21300 T6K22.30	16	ppt-miR538a, ppt-miR538b, ppt-miR538c, gma-miR4374a, mtr-miR5210, gma-miR5380a, gma-miR5380b, pti-miR5481, hme-miR-276, bdi-miR7777-3p.1, gra-miR8702, gra-miR8743c, gra-miR8743d, gra-miR8743e, gra-miR8743a, gra-miR8752
MADS18 OsI_025875	16	sof-miR159e, ath-miR868-3p, ppt-miR1045, tae-miR1138, zma-miR2275b-3p, zma-miR2275b-3p, zma-miR2275c-3p, zma-miR2275c-3p, mtr-miR5232, pti-miR5483, hme-miR-2763, ghr-miR7497, rgl-miR7807b-3p, gra-miR8706a, gra-miR8706b, ata-miR6201-3p
MADS18 OsI_025875	16	osa-miR171c-5p, pta-miR950a, pta-miR950b, mtr-miR2655b, aqc-miR477d, aly-miR164c-3p, aly-miR169h-3p, aly-miR169j-3p, aly-miR169k-3p, aly-miR169l-3p, bdi-miR169e-3p, gma-miR5037d, gma-miR5761a, gma-miR5761b, hme-miR-928, ata-miR169i-3p
MADS18 OsI_025875	16	osa-miR171c-5p, pta-miR950a, pta-miR950b, mtr-miR2655b, aqc-miR477d, aly-miR164c-3p, aly-miR169h-3p, aly-miR169j-3p, aly-miR169k-3p, aly-miR169l-3p, bdi-miR169e-3p, gma-miR5037d, gma-miR5761a, gma-miR5761b, hme-miR-928, ata-miR169i-3p
EXL5 At2g17230 T23A1.9	16	zma-miR169a-3p, zma-miR169b-3p, osa-miR528-5p, mtr-miR2599, zma-miR528a-5p, zma-miR528b-5p, sbi-miR528, aly-miR3439-5p, aly-miR3440-3p, ath-miR5029, bdi-miR528-5p, ssp-miR528, bdi-miR5181d, mtr-miR2643b-5p, lja-miR7529, ata-miR528-5p
ANN4 ANNAT4 At2g38750 T6A23.5	16	gma-miR482a-5p, esi-miR3457-5p, vvi-miR3630-5p, pab-miR3708, gma-miR4343a, mtr-miR5296, mtr-miR5554a-5p, mtr-miR5554b-5p, mtr-miR5554c-5p, hme-miR-1a, hme-miR-6301-3p, ptc-miR6459a-3p, ptc-miR6431, bdi-miR5174e-5p.2, bdi-miR7725b-5p.2, stu-miR8001b-5p
ANN4 ANNAT4 At2g38750 T6A23.5	16	osa-miR395t, gma-miR1525, pta-miR1314, mtr-miR2659a, mtr-miR2659b, mtr-miR2659c, mtr-miR2659d, mtr-miR2659e, mtr-miR2659f, mtr-miR2659g, mtr-miR2659h, mtr-miR2659i, mtr-miR2659j, mtr-miR2659k, hbr-miR9386, gma-miR9736
ACA5 Os04g0605500 LOC_Os04g51610 OsJ_16068 OSJNBa0035M09.2 OSJNBb0015N08.12	16	mtr-miR156i-3p, cre-miR905-5p, osa-miR444b.1, osa-miR444c.1, ptc-miR530a, mtr-miR2119, csi-miR530a, tcc-miR530b, tcc-miR535, sbi-miR5386, htu-miR530, cme-miR530b, cme-miR530a, mes-miR530a, mes-miR530b, gra-miR8734
NAC021 NAC022 NAC1 At1g56010 F14J16.32 T6H22.19	16	zma-miR164d-3p, osa-miR396e-5p, ptc-miR1444b, ptc-miR1444c, gma-miR4400, far-miR396, bdi-miR396a-5p, bdi-miR396a-3p, bdi-miR396b-5p, hme-miR-6302-1-5p, ptc-miR6435, stu-miR7986, ata-miR396a-5p, ata-miR396a-3p, ata-miR396d-5p, ata-miR396b-5p
At1g06690 F12K11.2 F4H5.17	16	mtr-miR2086-3p, ahy-miR3513-3p, gma-miR5379, gma-miR1512b, aau-miR2086, amg-miR2086, gma-miR5772, osa-miR5789, hme-miR-745, mdm-miR171i, lja-miR171c, stu-miR479, gra-miR8771e, bra-miR9567-5p, tae-miR9773, ata-miR171a-3p
	16	ath-miR773a, cre-miR909.1, vvi-miR169r, vvi-miR169t, vvi-miR169u, gma-miR1532, mtr-miR2111g-3p, gma-miR169u, hbr-miR6166, hvu-miR6192, rgl-miR7805-5p, cpa-miR8135, gra-miR8659a, gra-miR8659b, gra-miR8727, bdi-miR9499
At5g47540 MNJ7.13	16	aqu-miR-2018-5p, vvi-miR477b-3p, pab-miR3706, nta-miR399a, nta-miR399b, nta-miR399c, nta-miR399d, nta-miR399e, nta-miR399f, nta-miR399g, stu-miR399j-3p, stu-miR399k-3p, stu-miR399l-3p, stu-miR399m-3p, stu-miR399n-3p, stu-miR399o-3p
IRE At5g62310	16	zma-miR399c-5p, ppt-miR1217-5p, mtr-miR2587a, mtr-miR2587b, mtr-miR2587c, mtr-miR2587d, mtr-miR2587e, mtr-miR2587f, mtr-miR5743a, mtr-miR5743b, hvu-miR6187, mtr-miR2587g, bdi-miR7781-3p, gra-miR5741, gra-miR8751a, ata-miR5200-5p
IRE At5g62310	16	zma-miR171b-5p, smo-miR1098, ddi-miR-1176, aly-miR166g-5p, aly-miR399g-5p, aly-miR399i-5p, gma-miR166h-5p, gma-miR5030, gma-miR166j-5p, mtr-miR2592bl-3p, mtr-miR5760, stu-miR166c-5p, cpa-miR8134, gra-miR8681, gra-miR7484c, tae-miR9655-3p
LIR1 Os01g0102900 LOC_Os01g01340 OsJ_00023 P0436E04.2 P0455C04.23 P0672D08.50	16	ppt-miR1219a, ppt-miR1219b, ppt-miR1219c, ppt-miR1219d, ath-miR780.2, osa-miR444b.1, osa-miR444c.1, gma-miR1528, osa-miR1880, mtr-miR2592a-5p, mtr-miR2635, osa-miR5532, nta-miR6146a, nta-miR6146b, osa-miR7694-5p, gma-miR9760
OXI1 AGC2-1 At3g25250 MJL12.21	16	gma-miR396b-3p, ptc-miR394a-3p, ptc-miR394b-3p, ptc-miR396e-3p, ptc-miR396g-3p, mtr-miR396a-3p, smo-miR1099, tae-miR1117, osa-miR1423-3p, ahy-miR3510, ahy-miR3521, mtr-miR5213-5p, gma-miR396k-3p, osa-miR5801, stu-miR7980b-3p, gra-miR8705
SAT1 SAT5 At1g55920 F14J16.18	16	zma-miR172d-5p, zma-miR172b-5p, tae-miR1120a, bra-miR172b-5p, aly-miR172b-5p, hvu-miR1120, ath-miR5013, mtr-miR5747, hme-miR-305, han-miR3440, ghr-miR7507, stu-miR172b-5p, ath-miR8179, esi-miR8624b, bra-miR172c-5p, ata-miR172a-5p
MYB94 ATMYBCP70 At3g47600 F1P2.150	16	ath-miR168b-3p, osa-miR426, zma-miR159a-5p, ath-miR774a, gma-miR2107, aly-miR168b-3p, gma-miR394b-3p, osa-miR5150-5p, bdi-miR5178-5p, mtr-miR5747, ptc-miR6454, sbi-miR5568d-3p, mtr-miR2592bo-5p, bdi-miR159b-5p.1, bdi-miR7735-5p, ata-miR398f-5p
MYB96 MYBCOV1 At5g62470 K19B1.8	16	gma-miR172b-5p, ptc-miR172b-5p, ptc-miR172g-5p, ptc-miR172h-5p, ppt-miR1032, aly-miR172a-5p, aly-miR172c-5p, aly-miR3438-5p, mtr-miR172c-5p, nta-miR6150, mtr-miR172d-5p, stu-miR172d-5p, aly-miR172f-5p, gra-miR172b, bra-miR172d-5p, ata-miR172c-5p
URT1 At2g45620 F17K2.15	16	ath-miR158a-3p, ath-miR158b, zma-miR160d-3p, zma-miR399b-5p, zma-miR399d-5p, ath-miR842, ppt-miR1039-5p, zma-miR399i-5p, zma-miR399j-5p, aly-miR158a-3p, aly-miR842-3p, aly-miR856-5p, cpa-miR8149, cpa-miR8153, gra-miR8693, bra-miR158-3p
HIPP07 FP3 At5g63530 MLE2.16	16	zma-miR167g-3p, zma-miR398a-3p, zma-miR398b-3p, zma-miR528a-3p, zma-miR528b-3p, sbi-miR398, aly-miR390b-3p, vvi-miR2111-5p, tae-miR398, bdi-miR528-3p, mdm-miR2118a, mdm-miR2118b, mdm-miR2118c, ata-miR398f-3p, ata-miR528-3p, ata-miR398g-3p
At5g20050 F28I16.200	16	osa-miR1846a-5p, osa-miR1846a-5p, osa-miR1846b-5p, osa-miR1846b-5p, osa-miR1846c-5p, osa-miR1846c-5p, zma-miR171m-5p, aly-miR838-5p, ahy-miR3521, gma-miR4368b, gma-miR4375, mtr-miR5037a, mtr-miR5037b, mtr-miR5037c, ptc-miR482c-5p, cpa-miR8147
At2g39795 T5I7.20	16	ath-miR391-3p, sly-miR171c, aly-miR391-3p, osa-miR3979-5p, mtr-miR5284a, mtr-miR5284b, mtr-miR5284c, mtr-miR5284d, mtr-miR5284e, mtr-miR5284f, mtr-miR5284g, nta-miR171a, ghr-miR7511, stu-miR7992-3p, gra-miR1446, bra-miR391-3p
KEA2 At4g00630/At4g00640 F6N23.14/F6N23.15	16	ath-miR171c-5p, osa-miR415, cre-miR918, gma-miR1515a, ath-miR2933a, ath-miR2933b, aly-miR171c-5p, vvi-miR3623-5p, gma-miR171c-5p, ath-miR5664, osa-miR5804, osa-miR5832, hvu-miR6204, gma-miR1515b, hme-miR-2797, stu-miR171d-5p
KEA2 At4g00630/At4g00640 F6N23.14/F6N23.15	16	ath-miR171c-5p, osa-miR415, cre-miR918, gma-miR1515a, ath-miR2933a, ath-miR2933b, aly-miR171c-5p, vvi-miR3623-5p, gma-miR171c-5p, ath-miR5664, osa-miR5804, osa-miR5832, hvu-miR6204, gma-miR1515b, hme-miR-2797, stu-miR171d-5p
AO2	16	osa-miR443, mtr-miR2635, zma-miR393b-3p, sbi-miR5565c, nta-miR6025b, hme-miR-6301-2-5p, sbi-miR5565g-3p, lja-miR7526a, lja-miR7526b, lja-miR7526c, lja-miR7526d, lja-miR7526e, lja-miR7526f, lja-miR7526g, lja-miR7526h, gra-miR8677
AO2	16	zma-miR169a-3p, zma-miR169b-3p, cre-miR1156.2, aly-miR829-5p, aly-miR831-3p, vvi-miR3629a-5p, osa-miR3982-5p, mtr-miR5743a, mtr-miR5743b, sbi-miR5568f-5p, bdi-miR7779-3p, gra-miR7502b, gra-miR7502c, gra-miR8714, tae-miR531, ata-miR2275b-5p
Os07g0281700 Os07g0281800 LOC_Os07g18120 P0557D09.31	16	gma-miR1512a-5p, mtr-miR2655a, mtr-miR2655c, mtr-miR2655d, mtr-miR2655e, mtr-miR2655f, mtr-miR2655g, mtr-miR2655h, mtr-miR2655i, mtr-miR2655j, mtr-miR2655k, mtr-miR2655l, mtr-miR2655m, mtr-miR2655n, mtr-miR2655o, sbi-miR6219-3p
Os07g0281700 Os07g0281800 LOC_Os07g18120 P0557D09.31	16	gma-miR1512a-5p, mtr-miR2655a, mtr-miR2655c, mtr-miR2655d, mtr-miR2655e, mtr-miR2655f, mtr-miR2655g, mtr-miR2655h, mtr-miR2655i, mtr-miR2655j, mtr-miR2655k, mtr-miR2655l, mtr-miR2655m, mtr-miR2655n, mtr-miR2655o, sbi-miR6219-3p
LIP1 Sb06g018660	16	osa-miR810a, aly-miR172a-5p, tcc-miR172d, bdi-miR5173-5p, ssp-miR1128, bdi-miR164f, gma-miR166i-5p, ssl-miR395, mtr-miR5758, mtr-miR5745b, hbr-miR6167, ptc-miR6477, lja-miR7518, stu-miR166d-5p, bra-miR9562-5p, bra-miR408-5p
LIP1 Sb06g018660	16	ghr-miR156c, mtr-miR2590a, mtr-miR2590b, mtr-miR2590c, mtr-miR2590d, mtr-miR2590e, mtr-miR2590f, aly-miR159a-5p, gma-miR4997, osa-miR5082, mtr-miR5206a, mtr-miR156j, mdm-miR7125, bdi-miR7776-3p.1, stu-miR8007b-5p, gma-miR9759
LIP1 Sb06g018660	16	zma-miR171k-5p, zma-miR171h-5p, ppt-miR1222a, ath-miR840-3p, ath-miR840-3p, vvi-miR479, ghr-miR479, aly-miR840-3p, aly-miR840-3p, gma-miR4364b, csi-miR479, nta-miR479a, stu-miR7991a, stu-miR7991b, stu-miR7991c, ata-miR171a-5p
ABCG35 PDR11 PDR2 Os01g0609200 LOC_Os01g42370 P0410E03.6	15	osa-miR1846a-5p, osa-miR1846b-5p, aqu-miR-2015-3p, osa-miR1846c-5p, ctr-miR171, aly-miR837-3p, gma-miR4414-3p, gma-miR171m, gma-miR171n, gma-miR171p, gma-miR171t, mdm-miR171a, mdm-miR171b, stu-miR171b-3p, sly-miR171e
At5g65560 K21L13.7	15	osa-miR528-5p, ppt-miR1036-5p, mtr-miR2642, zma-miR528a-5p, zma-miR528b-5p, sbi-miR528, gma-miR4367, bdi-miR528-5p, ssp-miR528, mtr-miR5751, gma-miR166m, hvu-miR6184, mes-miR166i, cpa-miR166e, ata-miR528-5p
GTE8 At3g27260 K17E12.8	15	mtr-miR2652a, mtr-miR2652b, mtr-miR2652c, mtr-miR2652d, mtr-miR2652e, mtr-miR2652f, mtr-miR2652g, mtr-miR2652h, mtr-miR2652i, mtr-miR2652j, mtr-miR2652k, mtr-miR2652l, aly-miR3441-5p.1, mtr-miR5263, mtr-miR2652m
PUX2 PUB3 At2g01650 T8O11.18	15	mtr-miR2652a, mtr-miR2652b, mtr-miR2652c, mtr-miR2652d, mtr-miR2652e, mtr-miR2652f, mtr-miR2652g, mtr-miR2652h, mtr-miR2652i, mtr-miR2652j, mtr-miR2652k, mtr-miR2652l, aly-miR3441-5p.1, mtr-miR5263, mtr-miR2652m
PAPS4 NPAP At4g32850 T16I18.60	15	mtr-miR156i-3p, cre-miR1166.2, zma-miR2275d-3p, ath-miR2934-3p, esi-miR3454g-3p, esi-miR3454a-3p, esi-miR3454c-3p, esi-miR3454f-3p, esi-miR3454b-3p, esi-miR3454e-3p, esi-miR3454d-3p, mtr-miR5233, ptc-miR482b-3p, sbi-miR6222-3p, lja-miR7521
PIP5K2 At1g77740 T32E8.7	15	osa-miR408-5p, cre-miR1162-3p, aly-miR395b-5p, aly-miR395c-5p, bdi-miR408-5p, osa-miR5537, mtr-miR396c, cca-miR6114-3p, nta-miR6159, ghr-miR7508, lja-miR7532a, lja-miR7532b, bdi-miR5174e-5p.1, bdi-miR5174b-5p, bdi-miR7736-3p
DXR Os01g0106900 LOC_Os01g01710 OsJ_00058 P0005A05.24 P0482C06.2	15	osa-miR166h-5p, zma-miR166m-5p, osa-miR528-3p, mtr-miR166e-5p, gma-miR1509a, osa-miR2876-3p, zma-miR482-5p, zma-miR528a-3p, zma-miR528b-3p, gso-miR1509a, bdi-miR528-3p, bdi-miR398b, tae-miR9677a, ata-miR528-3p, ata-miR9677-3p
ADK-B Os11g0312400 LOC_Os11g20790; Os11g0312220	15	ath-miR419, ptc-miR156k, cre-miR911, vvi-miR156a, aly-miR823-5p, osa-miR5544, bra-miR5715, dpr-miR156a, hvu-miR6213, ptc-miR6473, hci-miR156b, har-miR156c, cme-miR156h, cme-miR156g, tae-miR9652-3p
ADK-B Os11g0312400 LOC_Os11g20790; Os11g0312220	15	ath-miR419, ptc-miR156k, cre-miR911, vvi-miR156a, aly-miR823-5p, osa-miR5544, bra-miR5715, dpr-miR156a, hvu-miR6213, ptc-miR6473, hci-miR156b, har-miR156c, cme-miR156h, cme-miR156g, tae-miR9652-3p
RAN1	15	osa-miR166b-5p, ath-miR420, zma-miR166a-5p, ppt-miR1222a, ppt-miR1222b, ppt-miR1222c, ppt-miR1222d, aly-miR774a-5p.2, esi-miR3469-3p, hvu-miR5049a, bdi-miR166b-5p, osa-miR5542, gma-miR5782, ptc-miR6435, ata-miR166d-5p
RAN-B1	15	ath-miR156b-3p, osa-miR156f-3p, osa-miR156h-3p, osa-miR156l-3p, ath-miR414, ath-miR414, zma-miR156d-3p, zma-miR156f-3p, zma-miR156g-3p, aly-miR156b-3p, ath-miR5662, hvu-miR6188, ptc-miR6468-3p, bdi-miR7753-5p, bra-miR156e-3p
At2g24240 F27D4.15	15	ath-miR170-5p, ath-miR171a-5p, zma-miR169l-3p, zma-miR398b-5p, ghr-miR399c, aly-miR170-5p, aly-miR171a-5p, vvi-miR3631a-3p, gma-miR171j-5p, stu-miR171a-5p, stu-miR171c-5p, gra-miR8739, sly-miR166c-5p, tae-miR9652-3p, tae-miR9652-3p
WAV2 At5g20520	15	osa-miR2118h, osa-miR2118k, zma-miR2118a, esi-miR3458-5p, gma-miR530a, osa-miR5071, bdi-miR5179, gma-miR530b, mtr-miR530, gma-miR530c, gma-miR530d, gma-miR530e, osa-miR5179, bdi-miR9497, tae-miR9781
CPK4 CDPK1 Os02g0126400 LOC_Os02g03410 P0482F12.15-1 P0482F12.15-2	15	osa-miR1866-5p, osa-miR2098-5p, osa-miR2121a, osa-miR2121b, aly-miR3445-3p.1, hvu-miR5051, ath-miR5650, gma-miR5037d, hme-miR-2763, sbi-miR6223-5p, lja-miR7516-5p, stu-miR8041a-3p, stu-miR8041b-3p, gra-miR8697, bra-miR9562-5p
IDD12 At4g02670 T10P11.4	15	osa-miR1866-5p, osa-miR2098-5p, osa-miR2121a, osa-miR2121b, aly-miR3445-3p.1, hvu-miR5051, ath-miR5650, gma-miR5037d, hme-miR-2763, sbi-miR6223-5p, lja-miR7516-5p, stu-miR8041a-3p, stu-miR8041b-3p, gra-miR8697, bra-miR9562-5p
At4g38150 F20D10.270	15	ptc-miR476a, zma-miR390a-3p, zma-miR390b-3p, aly-miR390b-3p, bdi-miR390a-3p, osa-miR5794, hbr-miR476, gma-miR9746a, gma-miR9746b, gma-miR9746c, gma-miR9746d, gma-miR9746e, gma-miR9746f, gma-miR9746g, gma-miR9746h
RPL8 RPL2	15	ptc-miR476a, zma-miR390a-3p, zma-miR390b-3p, aly-miR390b-3p, bdi-miR390a-3p, nta-miR6163, hbr-miR476, gma-miR9746a, gma-miR9746b, gma-miR9746c, gma-miR9746d, gma-miR9746e, gma-miR9746f, gma-miR9746g, gma-miR9746h
RPL8 RPL2	15	ath-miR2934-5p, pab-miR3701, ath-miR5645c, osa-miR5794, nta-miR6020a-3p, hbr-miR2118, osa-miR6251, ptc-miR6442, mtr-miR172d-5p, bdi-miR7741-3p.1, bdi-miR7746-3p, esi-miR8623b, gra-miR8642, gra-miR8738a, gra-miR8738b
At1g60070 T2K10.12	15	ptc-miR160h, ath-miR825, ppt-miR160b, ppt-miR160c, ppt-miR160d, ppt-miR160i, ppt-miR1061-3p, osa-miR1864, gma-miR160b, gma-miR160c, gma-miR160d, gma-miR160e, nta-miR160d, htu-miR160a, bdi-miR160f
At1g60070 T2K10.12	15	mtr-miR171a, gma-miR2108b, ctr-miR171, gma-miR171d, mtr-miR5232, sly-miR5300, gma-miR171m, gma-miR171n, gma-miR171p, gma-miR171t, mdm-miR171a, mdm-miR171b, stu-miR171b-3p, cpa-miR8135, sly-miR171e
VIII-1 ATM ATM1 At3g19960 MZE19.1	15	ath-miR426, ath-miR426, ppt-miR1214, ghr-miR156c, mtr-miR2588a, mtr-miR2588b, aly-miR3433-5p, aly-miR4247, bdi-miR5170, ath-miR5631, mdm-miR7120a, mdm-miR7120b, mdm-miR7125, bdi-miR7717c-3p, bdi-miR7738-5p
VHA-D VATD VATPD At3g58730 T20N10_80	15	pta-miR951, cre-miR1160.1, mtr-miR2111d-3p, aly-miR3438-5p, pab-miR3707, pab-miR951, ath-miR5028, mtr-miR2111l, mtr-miR2111a-3p, gma-miR2111a, gma-miR2111d, hbr-miR6167, hvu-miR6204, pde-miR951, ghr-miR7511
AGL65 At1g18750 F6A14.14	15	ath-miR172d-5p, osa-miR168b, ptc-miR473a-5p, mtr-miR1507-3p, osa-miR2118d, osa-miR2118p, zma-miR2118d, aly-miR172d-5p, bra-miR5719, osa-miR5833, stu-miR6024-3p, sbi-miR2118-3p, gma-miR9725, ata-miR2118c-3p, ata-miR2118d-3p
AGL65 At1g18750 F6A14.14	15	ptc-miR159e, osa-miR444b.2, osa-miR444c.2, osa-miR1440a, esi-miR3463-3p, hvu-miR444b, ssp-miR444c-3p, zma-miR444a, zma-miR444b, gma-miR5783, nta-miR6155, hvu-miR6179, bdi-miR444c, bdi-miR444d, bra-miR164e-3p
EDR1 STY10 At1g08720 F22O13.20	15	ppt-miR1030j, cre-miR1168.1, osa-miR2863b, mtr-miR5244, osa-miR5522, osa-miR5541, nta-miR5303c, hvu-miR1130, bdi-miR5167b-5p, bdi-miR5049-3p, bdi-miR7755-5p, rgl-miR7807a-3p, rgl-miR7807b-3p, ptc-miR7819, gra-miR8777
EDR1 STY10 At1g08720 F22O13.20	15	ppt-miR1030a, ppt-miR1030b, ppt-miR1030c, ppt-miR1030d, ppt-miR1030e, ppt-miR1030f, ppt-miR1030g, ppt-miR1030h, ppt-miR1030i, ppt-miR1030j, ptc-miR6437b, ptc-miR6437a, bdi-miR7741-3p.2, stu-miR530, gma-miR9726
	15	ath-miR782, ath-miR861-5p, gma-miR1513a-5p, osa-miR2876-3p, bgy-miR529, bcy-miR529, tcc-miR535, gma-miR1513b, gma-miR1513c, ddi-miR-7131a-5p, ddi-miR-7131c-3p, ath-miR8173, hbr-miR9387, bdi-miR531, bdi-miR531
	15	ath-miR158a-3p, ath-miR158b, osa-miR160e-3p, zma-miR164b-3p, zma-miR160f-3p, ppt-miR1216, aly-miR158a-3p, aly-miR158b-3p, esi-miR3453-5p, bdi-miR7741-3p.1, stu-miR8032a-3p, stu-miR8032b-3p, stu-miR8032e-3p, stu-miR8032f-3p, stu-miR8032g-3p
	15	ath-miR837-5p, tae-miR1122a, osa-miR1861n, pvu-miR2118, bdi-miR1122, aly-miR397a-3p, ahy-miR3520-3p, gso-miR2218, far-miR1122, gma-miR2118a-3p, gma-miR2118b-3p, mtr-miR2643b-5p, osa-miR5510, vun-miR2118, ptc-miR6427-3p
	15	zma-miR395c-5p, cre-miR1154-3p, osa-miR1857-5p, ghr-miR479, gma-miR4349, gma-miR4392, csi-miR479, ath-miR5026, mtr-miR5558-5p, gma-miR171o-5p, nta-miR479a, lja-miR7539, stu-miR7980b-5p, stu-miR171d-5p, gra-miR8759
At4g28440 F20O9.120	15	ptc-miR396e-3p, pta-miR156b, ppt-miR902i-3p, ppt-miR1033a, ppt-miR1033b, ppt-miR1033c, ppt-miR1033d, ppt-miR1033e, aqc-miR529, mtr-miR5280, osa-miR5540, osa-miR5791, bdi-miR7778-3p, gra-miR8684, ata-miR160a-3p
At3g19950 MPN9.19	15	ath-miR865-5p, mtr-miR2622, bdi-miR5185a-3p, bdi-miR5185b-3p, mtr-miR5259, bdi-miR5185c-3p, bdi-miR5185d-3p, bdi-miR5185e-3p, bdi-miR5185f-3p, bdi-miR5185g-3p, bdi-miR5185h-3p, bdi-miR5185i-3p, bdi-miR5185j-3p, bdi-miR5185k-3p, bdi-miR5185m-3p
At3g19950 MPN9.19	15	osa-miR2275a, osa-miR2275b, zma-miR2118g, esi-miR3454a-5p, esi-miR3454c-5p, esi-miR3454f-5p, esi-miR3454b-5p, esi-miR3454e-5p, esi-miR3454d-5p, rgl-miR5575, mtr-miR5745a, bdi-miR7719-5p, bdi-miR2275c, ata-miR2275a-3p, ata-miR2275c-3p
RING1	15	ath-miR170-5p, ath-miR171a-5p, ptc-miR167f-3p, ptc-miR167g-3p, ptc-miR167h-3p, cre-miR1153-5p.1, zma-miR167j-3p, aly-miR170-5p, aly-miR171a-5p, ahy-miR167-3p, gma-miR171j-5p, ath-miR5654-5p, stu-miR171a-5p, stu-miR171c-5p, ata-miR167d-3p
CUT1 CER6 EL6 KCS6 At1g68530 T26J14.10	15	ath-miR828, ath-miR870-5p, ath-miR870-5p, ppt-miR1023b-3p, gma-miR1532, osa-miR1850.2, aly-miR828-5p, aly-miR846-5p, aly-miR846-5p, aly-miR869-5p, vvi-miR2950-5p, mes-miR2950, lja-miR7532a, lja-miR7532b, bdi-miR5181c-5p
CUT1 CER6 EL6 KCS6 At1g68530 T26J14.10	15	ppt-miR538a, ppt-miR538b, ppt-miR538c, ath-miR832-3p, cre-miR1153-5p.2, mtr-miR2629a, mtr-miR2629d, mtr-miR2629e, mtr-miR2629b, mtr-miR2629c, mtr-miR2629f, mtr-miR2629g, ath-miR3440b-5p, gma-miR169n-3p, bra-miR9552a-5p
BGLU4 Os01g0897600 LOC_Os01g67220 OsJ_04409 P0506A10.5 P0674H09.22	15	osa-miR2866, osa-miR2866, pab-miR3696, bdi-miR5180b, bdi-miR5180a, mtr-miR5263, ath-miR5663-3p, sbi-miR5568g-3p, bdi-miR7745-5p, stu-miR7984b-3p, gra-miR8707, gra-miR8752, bra-miR9568-5p, gma-miR9730, gma-miR9730
BGLU4 Os01g0897600 LOC_Os01g67220 OsJ_04409 P0506A10.5 P0674H09.22	15	ppt-miR1076-5p, ppt-miR1077-3p, bna-miR397a, bna-miR397b, gma-miR1531-3p, aly-miR869-3p, gma-miR4393b, bdi-miR5176-5p, bdi-miR5179, osa-miR5179, nta-miR6160, hme-miR-6301-3p, han-miR3630-3p, gra-miR8785, tae-miR9777
HOX21 Os03g0170600 LOC_Os03g07450 OSJNBa0091P11.3	15	ppt-miR537a, ppt-miR537b, ppt-miR537c, ppt-miR537d, osa-miR1858a, osa-miR1858b, osa-miR1862a, osa-miR1862b, osa-miR1862c, osa-miR2920, csi-miR393, mdm-miR5225c, ath-miR8121, gra-miR3267, gma-miR9750
BAM7 BMY4 At2g45880 F4I18.14	15	osa-miR160a-3p, osa-miR160b-3p, osa-miR160d-3p, zma-miR160a-3p, zma-miR160b-3p, zma-miR160g-3p, bdi-miR160a-3p, bdi-miR160b-3p, bdi-miR160c-3p, mtr-miR5233, ptc-miR6469, mtr-miR2592bo-5p, stu-miR8006-3p, tae-miR9655-3p, ata-miR160c-3p
RGA1 177O13.37 CB3A14.4	15	zma-miR399c-5p, ppt-miR1217-5p, mtr-miR2587a, mtr-miR2587b, mtr-miR2587c, mtr-miR2587d, mtr-miR2587e, mtr-miR2587f, mtr-miR5743a, mtr-miR5743b, hvu-miR6187, mtr-miR2587g, bdi-miR7781-3p, gra-miR8751a, ata-miR5200-5p
AIRP2 At5g01520 F7A7_40	15	zma-miR399c-5p, osa-miR528-5p, ath-miR774a, osa-miR2093-3p, zma-miR528a-5p, zma-miR528b-5p, sbi-miR528, bdi-miR528-5p, ssp-miR528, ath-miR5654-3p, gma-miR482e, cca-miR6118-5p, gra-miR8656, gra-miR827b, ata-miR528-5p
AIRP2 At5g01520 F7A7_40	15	osa-miR1423-5p, osa-miR1428a-3p, gma-miR1510a-5p, mtr-miR2655b, aly-miR167c-3p, gma-miR4403, csi-miR482a-5p, osa-miR3981-3p, gma-miR5371-5p, hme-miR-305, ptc-miR6462c-5p, sbi-miR5568b-3p, gra-miR8640, gra-miR8687, tae-miR1120c-5p
AIRP2 At5g01520 F7A7_40	15	osa-miR160a-3p, osa-miR160b-3p, osa-miR160d-3p, zma-miR160b-3p, ppt-miR1211-3p, ppt-miR2083-5p, zma-miR160g-3p, bdi-miR160a-3p, bdi-miR160b-3p, bdi-miR160c-3p, bdi-miR395f-5p, ghr-miR7510b, bdi-miR9483a, bdi-miR9483b, ata-miR160c-3p
CBL1 Os10g0564800 LOC_Os10g41510 OsJ_32489	15	osa-miR444a-3p.1, sbi-miR171f, ppt-miR1025, tae-miR444a, cre-miR1157-3p, osa-miR444b.1, osa-miR444c.1, osa-miR444d.1, bdi-miR444a, tae-miR444b, hvu-miR444a, mtr-miR5745b, bdi-miR7715-3p, bdi-miR7747-3p, bdi-miR9489
ACD6 At4g14400 dl3240w FCAALL.190	15	ppt-miR1063a, ppt-miR1063b, ppt-miR1063c, ppt-miR1063d, ppt-miR1063e, ppt-miR1063f, ppt-miR1063g, ppt-miR1063h, tcc-miR169n, mtr-miR2606c, hme-miR-2a, hme-miR-2b, hme-miR-2c, bdi-miR7719-5p, gra-miR8724
GOLS1 At2g47180 T3D7 T8I13	15	ath-miR160c-3p, ath-miR863-5p, esi-miR3460-3p, aly-miR4226, cca-miR6107, hme-miR-133, han-miR3440, mtr-miR7696a-5p, mtr-miR7696b-5p, mtr-miR7696d-5p, bdi-miR7783-5p, gra-miR8674b, bra-miR9567-3p, gma-miR9740, ata-miR395e-5p
LECCVA1	15	ppt-miR533b-5p, mtr-miR171e-5p, aly-miR3437-5p, gma-miR5041-5p, gma-miR171k-5p, gma-miR171l, mtr-miR5561-5p, mdm-miR397a, mdm-miR397b, mes-miR397, lja-miR171d-3p, bdi-miR397b-5p, stu-miR167b-3p, gra-miR8729, gra-miR8743a
KAB1 KV-BETA1 At1g04690 T1G11.6	15	ath-miR420, cre-miR919.1, ppt-miR1027a, ppt-miR1027b, tae-miR1131, cre-miR1156.2, osa-miR2103, zma-miR393c-3p, gra-miR482, aly-miR837-5p, sly-miR482a, stu-miR482a-3p, nta-miR482a, nta-miR482c, tae-miR9661-5p
UBL5 At5g42300 K5J14.10	15	osa-miR169d, ppt-miR898b, ppt-miR898a-5p, vvi-miR169v, osa-miR1860-3p, aly-miR868-5p, gma-miR4395, osa-miR5510, mtr-miR396c, gma-miR4416c, gma-miR319n, cme-miR169g, stu-miR396-3p, gra-miR8744, bdi-miR169l
BGLU22 Os05g0366600 LOC_Os05g30350 OSJNBa0090H02.10	15	ath-miR822-3p, ppt-miR1030a, ppt-miR1030b, ppt-miR1030c, ppt-miR1030d, ppt-miR1030e, ppt-miR1030f, ppt-miR1030g, ppt-miR1030i, ppt-miR1030j, osa-miR1863b, gma-miR4366, gma-miR5679, hme-miR-306, gma-miR9756
HAT2 At5g47370 MQL5.23	15	ath-miR822-3p, ppt-miR1030a, ppt-miR1030b, ppt-miR1030c, ppt-miR1030d, ppt-miR1030e, ppt-miR1030f, ppt-miR1030g, ppt-miR1030i, ppt-miR1030j, osa-miR1863b, gma-miR4366, gma-miR5679, hme-miR-306, gma-miR9756
HOX11 Os09g0447000 LOC_Os09g27450 OJ1596_C06.7 OsJ_028406	15	osa-miR166j-5p, cre-miR1168.1, cre-miR1168.1, osa-miR1320-3p, pvu-miR2118, gso-miR2218, gma-miR2118a-3p, gma-miR2118b-3p, gma-miR396f, gma-miR396g, vun-miR2118, cca-miR6118-3p, bdi-miR7741-5p.1, gra-miR7484h, gra-miR7484i
Os09g0567700 LOC_Os09g39420 OJ1003_C09.2 OJ1155_H10.34 OsJ_029198	15	ath-miR390a-3p, ptc-miR390d-3p, gma-miR390a-3p, aly-miR390a-3p, aly-miR399a-5p, gma-miR390c, osa-miR5544, hvu-miR6195, ghr-miR7485, mes-miR390, lja-miR390a-3p, lja-miR390b-3p, sly-miR390a-3p, sly-miR390b-3p, bra-miR390-3p
MCC1 At3g02980 F13E7.7	15	ath-miR829-3p.2, smo-miR1105, mtr-miR2668, aly-miR3444a-5p, vvi-miR3626-3p, bdi-miR7746-3p, stu-miR1886g-5p, stu-miR8032a-3p, stu-miR8032b-3p, stu-miR8032d-3p, stu-miR8032e-3p, stu-miR8032f-3p, stu-miR8032g-3p, ath-miR8179, sly-miR5302b-3p
WRKY70 At3g56400 T5P19.50	15	ghr-miR399a, ghr-miR399b, gma-miR482a-5p, osa-miR1879, osa-miR2929, aly-miR164c-3p, aly-miR4237, bdi-miR169k-3p, bdi-miR827-5p, mtr-miR5277, osa-miR5540, bdi-miR7749-3p, ptc-miR7840, gra-miR8736, gma-miR5780c
WRKY70 Solyc03g095770	15	ptc-miR398c-5p, ath-miR859, ppt-miR1073-5p, aly-miR859-5p, mtr-miR5205b, mtr-miR5205c, mtr-miR5205d, sbi-miR5568g-5p, mes-miR2275, lja-miR7519, bdi-miR7782-5p, gra-miR8764, gma-miR9750, ata-miR9863a-5p, ata-miR9863b-5p
ALKBH8 At1g31600 F27M3_19	15	osa-miR810a, aly-miR172a-5p, bdi-miR5173-5p, ssp-miR1128, bdi-miR164f, gma-miR166i-5p, ssl-miR395, mtr-miR5758, mtr-miR5745b, hbr-miR6167, ptc-miR6477, lja-miR7518, stu-miR166d-5p, bra-miR9562-5p, bra-miR408-5p
AG1	15	osa-miR810a, aly-miR172a-5p, bdi-miR5173-5p, ssp-miR1128, bdi-miR164f, gma-miR166i-5p, ssl-miR395, mtr-miR5758, mtr-miR5745b, hbr-miR6167, ptc-miR6477, lja-miR7518, stu-miR166d-5p, bra-miR9562-5p, bra-miR408-5p
CKX5 CKX6 At1g75450 F1B16.2	14	zma-miR394a-3p, zma-miR394b-3p, zma-miR399c-5p, smo-miR1112-5p, mtr-miR5274a, mtr-miR5559-3p, mtr-miR5559-3p, bdi-miR7768a-3p, bdi-miR7768b-3p, tae-miR9772, ata-miR9772a-5p, ata-miR9772b-5p, ata-miR394-3p, ata-miR399a-5p
GAF1 IDD2 At3g50700 T3A5.80	14	gma-miR1522, mtr-miR2639, mtr-miR2651, mtr-miR2668, ath-miR841b-5p, aly-miR841, hme-miR-2796, bdi-miR7741-5p.1, stu-miR319a-5p, gra-miR8644, gra-miR8703a, gra-miR8703b, gra-miR8703c, gra-miR8705
PEX4 UBC21 At5g25760 F18A17.10	14	ath-miR851-3p, ath-miR824-5p, bol-miR824, bra-miR824, bna-miR824, aly-miR824-5p, mtr-miR5272a, mtr-miR5272b, mtr-miR5272c, mtr-miR5272d, mtr-miR5272e, bna-miR2111c, hme-miR-34, bra-miR2111-5p
GTF2H2 P44 At1g05055 T7A14.8	14	ppt-miR1219a, ppt-miR1219b, ppt-miR1219c, ppt-miR1219d, aly-miR395e-5p, aly-miR395g-5p, gma-miR4358, mtr-miR5248, cca-miR6106-5p, hme-miR-71, bra-miR395d-5p, bra-miR395b-5p, bra-miR395c-5p, bra-miR395a-5p
SEC At3g04240 T6K12.14	14	ptc-miR159e, ppt-miR1060, vvi-miR159a, vvi-miR159b, gma-miR4387a, gma-miR396f, gma-miR396g, bra-miR5712, hbr-miR396a, mdm-miR408b, mdm-miR408c, mdm-miR408d, sbi-miR6230-3p, mtr-miR319c-5p
SEC At3g04240 T6K12.14	14	ptc-miR159e, ppt-miR1060, vvi-miR159a, vvi-miR159b, gma-miR4387a, gma-miR396f, gma-miR396g, bra-miR5712, hbr-miR396a, mdm-miR408b, mdm-miR408c, mdm-miR408d, sbi-miR6230-3p, mtr-miR319c-5p
BLH2 SAW1 At4g36870 AP22.90 C7A10.490	14	ath-miR854a, ath-miR854b, ath-miR854c, ath-miR854d, ath-miR854e, mtr-miR5284a, mtr-miR5284b, mtr-miR5284c, mtr-miR5284d, mtr-miR5284e, mtr-miR5284f, mtr-miR5284g, mtr-miR5284h, cca-miR6108f
MEKK1 At4g08500 T15F16.5	14	ath-miR420, zma-miR399b-5p, zma-miR399d-5p, ath-miR834, ppt-miR897, zma-miR399i-5p, aly-miR834-3p, tcc-miR169i, osa-miR5153, mtr-miR5235a, mtr-miR5235b, cca-miR6108e-3p, osa-miR6253, bdi-miR7780-3p
MEKK1 At4g08500 T15F16.5	14	vvi-miR3626-5p, osa-miR5080, mtr-miR2586b, cca-miR6108c, stu-miR5303c, stu-miR5303a, stu-miR5303b, stu-miR5303d, stu-miR5303f, gra-miR8654a, gra-miR8654b, gra-miR8654c, tae-miR396-5p, gma-miR9725
ROPGAP1 At5g22400 MWD9.20	14	ppt-miR1030a, ppt-miR1030b, ppt-miR1030c, ppt-miR1030d, ppt-miR1030e, ppt-miR1030f, ppt-miR1030g, ppt-miR1030h, ppt-miR1030i, ath-miR2112-3p, aly-miR398b-5p, aly-miR2112-3p, stu-miR530, ath-miR826b
ROPGAP1 At5g22400 MWD9.20	14	mtr-miR2593a, mtr-miR2593b, mtr-miR2593c, ahy-miR3518, vvi-miR3640-5p, gma-miR156k, gma-miR156n, gma-miR156o, mtr-miR5561-3p, bra-miR5722, hme-miR-6303-5p, mdm-miR156ad, mdm-miR156ae, ata-miR9674a-3p
NAC068 NAC4 Os01g0816100 LOC_Os01g60020 B1148D12.1 OSJNBa0085D07.44	14	osa-miR171h, zma-miR171h-3p, sbi-miR171f, ppt-miR1055, vvi-miR171g, gma-miR171r, gma-miR171s, mdm-miR171i, ghr-miR7497, bdi-miR7755-5p, stu-miR479, gra-miR8739, bdi-miR171f, ata-miR171a-3p
NAC068 NAC4 Os01g0816100 LOC_Os01g60020 B1148D12.1 OSJNBa0085D07.44	14	ath-miR414, ptc-miR478h, ptc-miR478i, ptc-miR478j, ptc-miR478k, ptc-miR478l, ptc-miR478o, ptc-miR478q, ptc-miR478r, ptc-miR478s, ptc-miR478n, ath-miR773a, ptc-miR1448, pde-miR482d
NAC068 NAC4 Os01g0816100 LOC_Os01g60020 B1148D12.1 OSJNBa0085D07.44	14	cre-miR910, aqu-miR-2018-5p, pvu-miR2118, gso-miR2218, gma-miR2118a-3p, gma-miR2118b-3p, gma-miR5042-5p, hme-miR-2788-3p, bdi-miR5181d, vun-miR2118, stu-miR7987, gra-miR7484f, tae-miR9674a-5p, ata-miR5181-3p
NAA10 At5g13780 MXE10.5	14	ppt-miR1073-5p, cme-miR169m, cme-miR169j, cme-miR169i, cme-miR169l, gra-miR7492e, gra-miR7492g, gra-miR7492h, gra-miR7492i, gra-miR7492j, gra-miR7492k, gra-miR7494e, gra-miR7494f, gra-miR7492f
NAA10 At5g13780 MXE10.5	14	ptc-miR478e, ath-miR827, ghr-miR827a, ghr-miR827b, ghr-miR827c, aly-miR827-3p, csi-miR827, tcc-miR827, sly-miR6027-3p, stu-miR6027, mdm-miR827, mes-miR827, bol-miR9408, bra-miR9408-3p
ORLIKE At5g06130	14	ath-miR162a-5p, ath-miR162b-5p, cre-miR1152, csi-miR162-5p, aly-miR162a-5p, aly-miR162b-5p, osa-miR5148a, osa-miR5148b, osa-miR5148c, osa-miR5338, stu-miR162a-5p, stu-miR162b-5p, sly-miR164b-3p, bra-miR162-5p
CRD1	14	ath-miR162a-5p, ath-miR162b-5p, cre-miR1152, csi-miR162-5p, aly-miR162a-5p, aly-miR162b-5p, osa-miR5148a, osa-miR5148b, osa-miR5148c, osa-miR5338, stu-miR162a-5p, stu-miR162b-5p, sly-miR164b-3p, bra-miR162-5p
CYP98A2	14	ath-miR162a-5p, ath-miR162b-5p, cre-miR1152, csi-miR162-5p, aly-miR162a-5p, aly-miR162b-5p, osa-miR5148a, osa-miR5148b, osa-miR5148c, osa-miR5338, stu-miR162a-5p, stu-miR162b-5p, sly-miR164b-3p, bra-miR162-5p
GSVIVT00037159001 LOC100264145	14	zma-miR160c-3p, ppt-miR1038-3p, osa-miR2870, zma-miR159e-5p, esi-miR3459-5p, ath-miR4227, pab-miR3698, gma-miR4353, gma-miR4353, bdi-miR5172-5p, bdi-miR5172-5p, mtr-miR5211, mdm-miR535d, gra-miR8647
SCO3 QWRF1 At3g19570 MMB12.2	14	aqc-miR477g, aqc-miR477e, aqc-miR477a, aqc-miR477b, aqc-miR477c, nta-miR477a, hme-miR-2733, mes-miR477a, mes-miR477b, mes-miR477c, mes-miR477e, gra-miR8785, bra-miR9555a-3p, tae-miR9667-5p
RPL21 At1g35680 F15O4.7	14	zma-miR395a-5p, ath-miR830-5p, tae-miR1137a, mtr-miR2596, aqc-miR477d, gma-miR4409, mtr-miR5218, hvu-miR6211, pde-miR1314, lja-miR7535, gra-miR8738a, gra-miR8738b, bra-miR9556-5p, gma-miR9759
AMI1 Os04g0118100 LOC_Os04g02780 OSJNBa0020P07.1	14	ath-miR413, ptc-miR477a-5p, ptc-miR477b, ppt-miR477c, ppt-miR477a-5p, ppt-miR477d, ppt-miR477e, ppt-miR477h, ppt-miR477b, vvi-miR477a, osa-miR2103, esi-miR3450-5p, mes-miR477f, mes-miR477g
RABC1 RAB18 RAB18-1 At1g43890 F28H19.15 F9C16.3	14	mtr-miR2659a, mtr-miR2659b, mtr-miR2659c, mtr-miR2659d, mtr-miR2659e, mtr-miR2659f, mtr-miR5286a, osa-miR5519, gma-miR5775, mtr-miR2659g, mtr-miR2659h, mtr-miR2659i, mtr-miR2659j, mtr-miR2659k
RABC1 RAB18 RAB18-1 At1g43890 F28H19.15 F9C16.3	14	mtr-miR2659a, mtr-miR2659b, mtr-miR2659c, mtr-miR2659d, mtr-miR2659e, mtr-miR2659f, gma-miR169i-3p, bdi-miR395d-5p, mtr-miR5286a, mtr-miR2659g, mtr-miR2659h, mtr-miR2659i, mtr-miR2659j, mtr-miR2659k
APRL5 Os03g0806500 LOC_Os03g59170 OsJ_13029 OSJNBa0059E14.22	14	osa-miR166g-5p, osa-miR1882a, osa-miR1882b, osa-miR1882c, osa-miR1882d, osa-miR1882e-5p, osa-miR1882f, osa-miR1882g, osa-miR1882h, gma-miR4370, vun-miR164, cpa-miR164d, cpa-miR164e, gra-miR8676
APRL5 At3g03860 F20H23.9	14	zma-miR395a-5p, zma-miR399a-5p, ppt-miR900-5p, mtr-miR2593a, mtr-miR2593b, mtr-miR2593c, zma-miR169l-3p, ath-miR5020b, gma-miR1512c, hbr-miR6166, pde-miR1314, ptc-miR6459b, stu-miR7980b-5p, stu-miR167b-3p
SARD1 At1g73805 F25P22.22	14	ath-miR776, ath-miR852, ppt-miR1061-5p, osa-miR1429-5p, osa-miR1882e-3p, aly-miR852-3p, gma-miR1507c-3p, bdi-miR5181a-5p, osa-miR5485, mtr-miR5561-5p, bra-miR5712, mtr-miR5742, hvu-miR5049b, tae-miR9779
SARD1 At1g73805 F25P22.22	14	ath-miR778, smo-miR1105, cre-miR1145.1, mtr-miR2648, zma-miR395o-5p, esi-miR3460-3p, aly-miR4223, mtr-miR5249, gma-miR4401b, mtr-miR5758, nta-miR6145a, sbi-miR5565g-5p, lja-miR7517, bra-miR9555b-5p
CBP60C At2g18750 MSF3.13	14	smo-miR1088-3p, vvi-miR159a, vvi-miR159b, osa-miR2098-3p, mtr-miR2585a, mtr-miR2585b, mtr-miR2585c, mtr-miR2585d, mtr-miR5295a, mtr-miR5295b, mtr-miR5295c, mtr-miR5295d, mes-miR159c, mes-miR159d
CBP60C At2g18750 MSF3.13	14	zma-miR159b-5p, osa-miR2098-3p, mtr-miR2604, zma-miR159j-5p, zma-miR159k-5p, esi-miR3468-5p, bdi-miR1878-3p, bdi-miR5174a, rgl-miR5578, nta-miR6146a, nta-miR6163, mtr-miR7696a-5p, mtr-miR7696b-5p, bra-miR172c-5p
SARD1 At1g73805 F25P22.22	14	ath-miR782, gma-miR1513a-5p, osa-miR2876-3p, bgy-miR529, bcy-miR529, tcc-miR535, gma-miR1513b, gma-miR1513c, ddi-miR-7131a-5p, ddi-miR-7131c-3p, ath-miR8173, hbr-miR9387, bdi-miR531, bdi-miR531
SARD1 At1g73805 F25P22.22	14	osa-miR528-5p, vvi-miR159a, vvi-miR159b, zma-miR528a-5p, zma-miR528b-5p, sbi-miR528, gma-miR1516b, bdi-miR528-5p, ssp-miR528, hvu-miR6184, osa-miR6249a, lja-miR7538, osa-miR6249b, ata-miR528-5p
ICR4 RIP4 At1g78430 F3F9.6	14	osa-miR817, smo-miR171c, cre-miR1172.2, aly-miR319a-5p, esi-miR3465-5p, csi-miR3948, hbr-miR482a, hme-miR-2768, lja-miR7545, stu-miR530, esi-miR8623a, esi-miR8623d, bra-miR319-5p, gma-miR9764
ICR4 RIP4 At1g78430 F3F9.6	14	osa-miR160d-3p, osa-miR167a-3p, zma-miR167a-3p, ptc-miR481a, ptc-miR481b, ptc-miR481c, ptc-miR481d, hvu-miR397a, bdi-miR5065, bdi-miR160a-3p, bdi-miR5166, nta-miR397, hbr-miR6485, bdi-miR7757-5p.2
PUMP1 UCP1 At3g54110 F24B22.70	14	osa-miR160d-3p, osa-miR167a-3p, zma-miR167a-3p, ptc-miR481a, ptc-miR481b, ptc-miR481c, ptc-miR481d, hvu-miR397a, bdi-miR5065, bdi-miR160a-3p, bdi-miR5166, nta-miR397, hbr-miR6485, bdi-miR7757-5p.2
PUMP1 UCP1 At3g54110 F24B22.70	14	zma-miR171m-5p, ath-miR5639-3p, bra-miR5719, stu-miR482b-3p, mdm-miR7121a, mdm-miR7121b, mdm-miR7121c, mdm-miR7121d, mdm-miR7121e, mdm-miR7121f, mdm-miR7121g, mdm-miR7121h, bdi-miR156f-3p, bdi-miR7748b-3p
PCMP-H52 MEF10 At3g11460 F24K9.13	14	ath-miR835-5p, cre-miR1154-5p, mtr-miR2591, mtr-miR2648, mtr-miR2672, zma-miR482-3p, aly-miR835-5p, aly-miR3436-3p, gma-miR4372b, bdi-miR7711-5p.1, bdi-miR7757-3p.1, cpa-miR8152, gma-miR5780c, gma-miR9742
WDR5B At4g02730 T5J8.2	14	zma-miR167b-3p, ptc-miR397b, ppt-miR1023b-3p, sly-miR397, aly-miR167b-3p, hvu-miR397a, dpr-miR397, bna-miR6035, mdm-miR171o, sbi-miR5568c-5p, mes-miR397, stu-miR167c-3p, stu-miR397-5p, ath-miR826b
EDR2L At5g45560 MFC19.23	14	ptc-miR396e-3p, pta-miR156b, ppt-miR1033a, ppt-miR1033b, ppt-miR1033c, ppt-miR1033d, ppt-miR1033e, aqc-miR529, mtr-miR5280, osa-miR5540, osa-miR5791, bdi-miR7778-3p, gra-miR8684, tae-miR9777
PCMP-E50 At2g37320 F3G5.11	14	osa-miR167e-3p, osa-miR167i-3p, zma-miR167h-3p, zma-miR167i-3p, ath-miR447a.2-3p, gma-miR1522, gma-miR1528, aqu-miR-2015-5p, osa-miR2100-3p, aly-miR3441-3p.1, ath-miR841b-3p, gma-miR5031, bdi-miR167d-3p, gma-miR9728
UBC5A Os01g0658400 LOC_Os01g46926 OsJ_02884	14	ath-miR400, ptc-miR475d-3p, ptc-miR475d-3p, smo-miR1101-3p, aly-miR400-5p, far-miR1119, mtr-miR5259, gma-miR4413b, gma-miR4413b, bdi-miR7710-3p, sly-miR9471b-5p, sly-miR9471a-5p, bra-miR400-5p, gma-miR9749
HSP70 ST70	14	ptc-miR475d-3p, ath-miR827, ppt-miR900-5p, osa-miR1435, sbi-miR1435b, ghr-miR827a, ghr-miR827b, ghr-miR827c, aly-miR827-3p, aly-miR4242, csi-miR827, tcc-miR827, hme-miR-1a, mes-miR827
LUG RON2 At4g32551 L23H3.30	14	ath-miR844-5p, osa-miR1861b, osa-miR1861f, osa-miR1861i, osa-miR1861l, mtr-miR2645, gar-miR2947, osa-miR5804, sbi-miR6224a-5p, sbi-miR6224b-5p, sbi-miR6224c-5p, gra-miR8659a, gra-miR8659b, gma-miR9760
ROPGEF12 MEEA64 At1g79860 F19K16.18	14	ath-miR844-5p, osa-miR1861b, osa-miR1861f, osa-miR1861i, osa-miR1861l, mtr-miR2645, gar-miR2947, osa-miR5804, sbi-miR6224a-5p, sbi-miR6224b-5p, sbi-miR6224c-5p, gra-miR8659a, gra-miR8659b, gma-miR9760
HSP70	14	osa-miR166k-3p, osa-miR166l-3p, sbi-miR166e, zma-miR166k-3p, zma-miR166j-3p, sbi-miR166g, zma-miR166n-3p, bdi-miR5178-5p, ssl-miR395, ptc-miR6439b, bdi-miR166h-3p, rgl-miR7798, gra-miR8733, ata-miR5168-3p
BTF3 At1g17880 F2H15.11	14	sbi-miR169d-3p, ppt-miR1218, ath-miR865-3p, zma-miR395k-5p, gma-miR1520n, gma-miR1520q, bdi-miR395j-5p, hme-miR-133, mdm-miR159c, lja-miR7523a, lja-miR7523b, bdi-miR395p-5p, bdi-miR7753-5p, ata-miR169c-3p
BTF3 At1g17880 F2H15.11	14	ath-miR5019, gma-miR5041-3p, gma-miR169k, gma-miR169l-5p, hme-miR-981, mes-miR169l, mes-miR169m, lja-miR7519, bdi-miR7714-5p, bdi-miR7729a-5p, bdi-miR7729b-5p, stu-miR8006-3p, cpa-miR169, sly-miR169e-5p
SQE3 At4g37760 T28I19.4	14	osa-miR396e-3p, ath-miR447a.2-3p, zma-miR167j-3p, bdi-miR396a-3p, bdi-miR396b-3p, ath-miR5654-3p, lja-miR7541, stu-miR167a-3p, stu-miR396-3p, gra-miR8703a, gra-miR8703b, gra-miR8703c, ata-miR396a-3p, ata-miR396d-3p
TUBB5 OSTB-50 R2242 TUB5 Os02g0167300 LOC_Os02g07060 OsJ_05524 OSJNBa0085K21.33	14	osa-miR396e-3p, ath-miR447a.2-3p, zma-miR167j-3p, bdi-miR396a-3p, bdi-miR396b-3p, ath-miR5654-3p, lja-miR7541, stu-miR167a-3p, stu-miR396-3p, gra-miR8703a, gra-miR8703b, gra-miR8703c, ata-miR396a-3p, ata-miR396d-3p
TUBB4	14	ppt-miR902f-3p, ptc-miR1446a, ptc-miR1446a, ptc-miR1446b, ptc-miR1446b, ptc-miR1446c, ptc-miR1446c, ptc-miR1446d, ptc-miR1446d, ptc-miR1446e, ptc-miR1446e, mes-miR1446, mes-miR1446, bdi-miR7725b-5p.1
NPF6.3 CHL1 NRT1 NRT1.1 At1g12110 F12F1.1 T28K15_13	14	mtr-miR2666, aly-miR774b-5p, aly-miR4240, pab-miR3711, gma-miR482b-5p, mtr-miR5256, gma-miR482d-5p, osa-miR5532, gma-miR482e, hvu-miR6214, bdi-miR7719-3p, bdi-miR7749-5p, rgl-miR7799, gra-miR8741
Os07g0682400 LOC_Os07g48410 OSJNBa0008J01.35	14	ptc-miR171c, ptc-miR171d, ptc-miR397c, mtr-miR171e-3p, ppt-miR1023e-3p, rco-miR171g, tcc-miR171b, tcc-miR171c, ptc-miR6468-5p, mes-miR171e, mes-miR171f, ptc-miR7840, ptc-miR7813, tae-miR9679-5p
OPT3 At4g16370 dl4215c FCAALL.72	14	ath-miR824-3p, ath-miR867, ddi-miR-1176, osa-miR1428a-3p, gma-miR1529, aly-miR397b-3p, aly-miR824-3p, aly-miR829-5p, ath-miR4221, vvi-miR3624-3p, mtr-miR5253, bra-miR5718, cca-miR6116-3p, rgl-miR7803a
OPT3 At4g16370 dl4215c FCAALL.72	14	ptc-miR172b-5p, ptc-miR172g-5p, gma-miR1514b-5p, aly-miR172c-5p, mtr-miR172c-5p, nta-miR6148b, ptc-miR6459a-3p, ptc-miR6457b, mtr-miR172d-5p, stu-miR8033-3p, stu-miR172d-5p, aly-miR172f-5p, bra-miR9554-5p, bra-miR172c-5p
XAT2 Os02g0330200 LOC_Os02g22480 OJ1116_E03.2 OsJ_06523	14	ppt-miR1030i, ppt-miR1030j, smo-miR1101-3p, ptc-miR530b, aqc-miR530, osa-miR2921, gma-miR4415a-5p, csi-miR530b, mtr-miR5291a, mtr-miR5291b, mtr-miR5291c, osa-miR5515, mdm-miR396a, stu-miR8035
XAT2 Os02g0330200 LOC_Os02g22480 OJ1116_E03.2 OsJ_06523	14	mtr-miR166b, cre-miR912, aqu-miR-2019-5p, sbi-miR166k, aqc-miR166c, aly-miR165a-3p, gma-miR166h-3p, bdi-miR166f, gma-miR166k, gma-miR166u, osa-miR7692-3p, mtr-miR7696c-3p, mtr-miR7696d-3p, gra-miR8676
Os07g0566200 LOC_Os07g37890 OJ1773_H01.121 OsJ_023811	14	mtr-miR166b, cre-miR912, aqu-miR-2019-5p, sbi-miR166k, aqc-miR166c, aly-miR165a-3p, gma-miR166h-3p, bdi-miR166f, gma-miR166k, gma-miR166u, osa-miR7692-3p, mtr-miR7696c-3p, mtr-miR7696d-3p, gra-miR8676
VIP2 At5g59710 MTH12.8	14	mtr-miR166b, cre-miR912, aqu-miR-2019-5p, sbi-miR166k, aqc-miR166c, aly-miR165a-3p, gma-miR166h-3p, bdi-miR166f, gma-miR166k, gma-miR166u, osa-miR7692-3p, mtr-miR7696c-3p, mtr-miR7696d-3p, gra-miR8676
At5g41620 MBK23.17	14	mtr-miR166b, cre-miR912, aqu-miR-2019-5p, sbi-miR166k, aqc-miR166c, aly-miR165a-3p, gma-miR166h-3p, bdi-miR166f, gma-miR166k, gma-miR166u, osa-miR7692-3p, mtr-miR7696c-3p, mtr-miR7696d-3p, gra-miR8676
TUBB8 TUB8	14	ath-miR158a-5p, zma-miR171f-5p, ppt-miR1058, ppt-miR1065, aqu-miR-2016-3p, aly-miR158a-5p, aly-miR158b-5p, aly-miR3446-5p, ath-miR4228-5p, bdi-miR5057, mtr-miR5221, rgl-miR7810, tae-miR9674b-5p, ata-miR9674a-5p
FRS5 At4g38180 F20D10.300	14	ppt-miR1221-5p, cre-miR914, osa-miR5147, osa-miR5531, gma-miR4387e, bdi-miR156g-3p, bdi-miR156i-3p, stu-miR164-3p, gra-miR8743c, gra-miR8743d, gra-miR8743e, gra-miR8743a, ata-miR156a-3p, ata-miR156e-3p
FRS5 At4g38180 F20D10.300	14	ppt-miR902h-5p, ppt-miR902i-5p, aly-miR3435-5p, mtr-miR2600b, mtr-miR2600c, mtr-miR2600d, mtr-miR2600e, osa-miR5487, osa-miR5487, bra-miR5722, bra-miR5722, bra-miR5725, bdi-miR7719-3p, stu-miR8001a
GLX2-2 GLY2 At3g10850 T7M13.7	14	ath-miR773a, cre-miR909.1, vvi-miR169r, vvi-miR169t, vvi-miR169u, gma-miR1532, mtr-miR2111g-3p, gma-miR169u, hbr-miR6166, hvu-miR6192, rgl-miR7805-5p, cpa-miR8135, gra-miR8727, bdi-miR9499
GLX2-2 GLY2 At3g10850 T7M13.7	14	osa-miR171f-5p, zma-miR171i-5p, ppt-miR1069-5p, gma-miR1510b-5p, mtr-miR2594, ghr-miR2949a-5p, ghr-miR2949b, ghr-miR2949c, osa-miR812n-5p, bdi-miR5178-3p, bdi-miR395j-5p, osa-miR5521, sbi-miR6221-3p, rgl-miR7799
AMY2 At1g76130 T23E18.6	14	ath-miR862-5p, mtr-miR2670f, mtr-miR2670g, sbi-miR5565f, mdm-miR7121a, mdm-miR7121b, mdm-miR7121c, mdm-miR7121d, mdm-miR7121e, mdm-miR7121f, mdm-miR7121g, mdm-miR7121h, ddi-miR-7131b, gra-miR8656
RCA2	14	ath-miR862-5p, aly-miR163-5p.1, sbi-miR5565f, mdm-miR7121a, mdm-miR7121b, mdm-miR7121c, mdm-miR7121d, mdm-miR7121e, mdm-miR7121f, mdm-miR7121g, mdm-miR7121h, ddi-miR-7131b, ghr-miR7489, gra-miR8656
UBQ11 At4g05050 C17L7.6 T32N4.13	14	ath-miR862-5p, mtr-miR2590g, sbi-miR5565f, stu-miR6024-5p, mdm-miR7121a, mdm-miR7121b, mdm-miR7121c, mdm-miR7121d, mdm-miR7121e, mdm-miR7121f, mdm-miR7121g, mdm-miR7121h, ddi-miR-7131b, gra-miR8656
PCUBI4-1	14	ptc-miR171l-3p, ptc-miR171m, ptc-miR171j, gma-miR171b-3p, csi-miR171b, mtr-miR5212-3p, mtr-miR171h, mtr-miR171g, lja-miR171c, bdi-miR7741-5p.2, stu-miR7984d-3p, ath-miR8171, bra-miR9557-5p, bra-miR9565-5p
UBQ11 At4g05050 C17L7.6 T32N4.13	14	ath-miR403-5p, cre-miR906-5p, pvu-miR159a.2, mtr-miR2111e-3p, bdi-miR5177, mtr-miR2592bi, mtr-miR2592bj, mtr-miR2592bk, nta-miR6145b, mtr-miR7696a-5p, mtr-miR7696b-5p, stu-miR7989, stu-miR319-3p, gma-miR5780d
ATPC At2g33040 F25I18.22	14	zma-miR167b-3p, osa-miR816, cre-miR1168.1, aqu-miR-2014-3p, pab-miR3699, ath-miR5645a, ath-miR5645b, ath-miR5645d, ath-miR5645f, ath-miR5645e, osa-miR1319b, ptc-miR6475, bdi-miR9485, ata-miR167a-3p
ATPC At2g33040 F25I18.22	14	osa-miR160d-3p, osa-miR160e-3p, zma-miR160a-3p, gma-miR160a-3p, gma-miR1520c, pab-miR3706, bdi-miR160a-3p, mtr-miR5238, gma-miR5373, ath-miR5999, stu-miR160a-3p, gra-miR8646, tae-miR9660-5p, ata-miR2275b-5p
ABCG16 WBC16 At3g55090 T15C9.80	14	ppt-miR1053-3p, smo-miR1092, smo-miR1103-3p, lja-miR2111-3p, aly-miR4229, ath-miR5645a, ath-miR5645b, ath-miR5645d, ath-miR5645f, ath-miR5645e, gma-miR5778, stu-miR8048-5p, stu-miR398b-5p, ata-miR166b-5p
Bp10	14	osa-miR395w, ppt-miR1025, osa-miR2120, aly-miR4224, aly-miR4224, vvi-miR3634-5p, osa-miR5150-3p, osa-miR5830, sly-miR6024, cca-miR6116-3p, ptc-miR6454, hbr-miR6483, stu-miR7984d-5p, ata-miR5084-3p
MYBS3 LOC_Os10g41200 Os10g0561400 OsJ_32461 OSJNBb0089A17.8	14	ath-miR160c-3p, osa-miR160a-3p, osa-miR160b-3p, ath-miR398b-5p, ath-miR398c-5p, zma-miR160b-3p, ptc-miR169aa, aqc-miR168, zma-miR160g-3p, aly-miR160c-3p, bdi-miR160b-3p, bdi-miR160c-3p, gra-miR7484j, ata-miR160c-3p
At3g50860 F18B3.140	14	osa-miR166g-5p, cre-miR908.3, mtr-miR2647a, mtr-miR2647b, mtr-miR2647c, esi-miR3469-3p, gma-miR4383, gma-miR4413a, osa-miR5072, gma-miR4413b, hvu-miR6195, sbi-miR6224a-3p, sbi-miR6224b-3p, sbi-miR6224c-3p
COR413IM1 COR413TM1 COR414TM1 At1g29395 F15D2.29	14	osa-miR166g-5p, cre-miR908.3, mtr-miR2647a, mtr-miR2647b, mtr-miR2647c, esi-miR3469-3p, gma-miR4383, gma-miR4413a, osa-miR5072, gma-miR4413b, hvu-miR6195, sbi-miR6224a-3p, sbi-miR6224b-3p, sbi-miR6224c-3p
EGY2 OsI_00340	14	zma-miR169a-3p, zma-miR169b-3p, ath-miR776, mtr-miR2597, zma-miR395e-5p, zma-miR395h-5p, zma-miR395j-5p, zma-miR395p-5p, osa-miR5071, ptc-miR482c-3p, mdm-miR5225a, mdm-miR5225b, bdi-miR7732-3p, ata-miR169h-3p
EGY2 Os01g0142100 LOC_Os01g04900 OsJ_00322 P0019D06.11	14	ppt-miR414, ppt-miR414, tae-miR1137a, mtr-miR2667a, aly-miR403a-5p, gma-miR5678, mtr-miR2667b, bdi-miR7724a-3p, bdi-miR7724b-3p, bdi-miR7728-5p, bdi-miR7770-3p, stu-miR7992-3p, aly-miR403b-5p, gma-miR9752
EGY2 OsI_00340	14	ptc-miR1446a, ptc-miR1446b, ptc-miR1446c, ptc-miR1446d, ptc-miR1446e, mtr-miR2676a, mtr-miR2676b, mtr-miR2676c, mtr-miR2676d, mtr-miR2676e, mtr-miR2676f, ath-miR5014a-3p, bdi-miR7730-3p, gra-miR530a
	14	ath-miR160c-3p, osa-miR1875, osa-miR1863b, hvu-miR1130, ptc-miR6430, han-miR3440, mtr-miR7696a-5p, mtr-miR7696b-5p, mtr-miR7696d-5p, gra-miR8654a, gra-miR8654b, gra-miR8654c, gra-miR8674b, bra-miR9567-3p
	14	osa-miR166k-3p, osa-miR166l-3p, sbi-miR166e, zma-miR166k-3p, zma-miR166j-3p, sbi-miR166g, ath-miR829-5p, ppt-miR1038-5p, osa-miR2106, zma-miR166n-3p, hme-miR-87, bdi-miR166h-3p, ptc-miR7821, ata-miR5168-3p
GAF1 IDD2 At3g50700 T3A5.80	14	ath-miR869.2, ptc-miR171l-3p, ptc-miR171m, ptc-miR171j, gma-miR171b-3p, osa-miR1320-3p, ath-miR2112-3p, aly-miR2112-3p, csi-miR171b, mtr-miR171h, mtr-miR5299, mtr-miR171g, nta-miR6144, stu-miR7989
UEL-2 Os04g0618200 LOC_Os04g52730 OsJ_16180 OSJNBa0058K23.4 OSJNBa0093O08.14	14	osa-miR169r-3p, osa-miR1875, zma-miR169l-3p, aly-miR3442-3p, ath-miR3932a, ath-miR3932b-3p, bdi-miR5178-3p, gma-miR5378, hvu-miR6191, ptc-miR6449, ghr-miR7499, bdi-miR7710-3p, bdi-miR7777-5p.1, stu-miR8034
UPF3 At1g33980 F12G12.20 T15K4.3	14	ppt-miR533b-5p, mtr-miR171e-5p, aly-miR3437-5p, gma-miR5041-5p, gma-miR171k-5p, gma-miR171l, mtr-miR5561-5p, mdm-miR397a, mdm-miR397b, mes-miR397, lja-miR171d-3p, bdi-miR397b-5p, stu-miR167b-3p, gra-miR8743a
PDCB3 At1g18650 F25I16.1	14	ptc-miR169b-3p, osa-miR1847.1, osa-miR2275a, osa-miR2275b, bdi-miR169a-3p, gma-miR169j-3p, bra-miR5717, mes-miR2275, gra-miR8717, bdi-miR2275c, tae-miR2275-3p, tae-miR530, ata-miR169g-3p, ata-miR2275c-3p
ARF1 ARF1A1C BEX1 At2g47170 T3D7.2 T8I13.1	14	osa-miR1847.1, pta-miR1316, osa-miR2275a, osa-miR2275b, aly-miR4243, gma-miR169j-3p, nta-miR6153, ghr-miR7490, mes-miR2275, gra-miR8717, bdi-miR2275c, tae-miR2275-3p, tae-miR530, ata-miR2275c-3p
EOL1 At4g02680 T10P11.24	14	ptc-miR396f, ptc-miR396g-5p, smo-miR396, tae-miR1123, mtr-miR2595, pab-miR396b, pab-miR396c, tcc-miR396d, mdm-miR396f, mdm-miR396g, cme-miR396e, bdi-miR7734-3p, gra-miR7506b, tae-miR9666a-3p
At2g23930 T29E15.13	14	ath-miR168b-3p, osa-miR426, zma-miR159a-5p, ath-miR774a, gma-miR2107, aly-miR168b-3p, gma-miR394b-3p, osa-miR5150-5p, bdi-miR5178-5p, ptc-miR6454, mtr-miR2592bo-5p, bdi-miR159b-5p.1, bdi-miR7735-5p, ata-miR398f-5p
At2g23930 T29E15.13	14	ath-miR168b-3p, osa-miR426, zma-miR159a-5p, ath-miR774a, gma-miR2107, aly-miR168b-3p, gma-miR394b-3p, osa-miR5150-5p, bdi-miR5178-5p, ptc-miR6454, mtr-miR2592bo-5p, bdi-miR159b-5p.1, bdi-miR7735-5p, ata-miR398f-5p
RPS2 At4g26090 F20B18.200	14	ptc-miR160h, ppt-miR160c, ppt-miR160g, ppt-miR160h, cre-miR1157-3p, sly-miR1916, zma-miR159h-3p, zma-miR159i-3p, zma-miR395k-5p, aly-miR771-5p, esi-miR3455-5p, osa-miR5827, dpr-miR160, nta-miR160d
RPS2 At4g26090 F20B18.200	14	cre-miR1142, ahy-miR3514-5p, gma-miR160b, gma-miR160c, gma-miR160d, gma-miR160e, gma-miR5368, mtr-miR2619b-3p, htu-miR160a, bdi-miR5181c-5p, gra-miR8770, bdi-miR160f, bra-miR9552b-5p, tae-miR9679-5p
At2g21870 F7D8.19	14	mtr-miR156g-5p, pta-miR166c, ppt-miR1058, gar-miR2947, aly-miR399g-5p, aly-miR399h-5p, aly-miR399i-5p, far-miR166, ath-miR5633, nta-miR6163, cme-miR156e, mtr-miR399s-5p, mtr-miR399t-5p, stu-miR8051-5p
At2g21870 F7D8.19	14	ppt-miR1221-3p, tae-miR1138, mtr-miR2665, gma-miR4382, pti-miR5479, gma-miR5667-3p, nta-miR6025b, nta-miR6025e, ddi-miR-7099, ghr-miR7499, ghr-miR7501, bdi-miR7760-3p, stu-miR7988, gra-miR8784
SNAP33 SNAP33B At5g61210 MAF19.21	14	osa-miR443, mtr-miR2635, zma-miR393b-3p, hme-miR-6301-2-5p, ghr-miR7486b, lja-miR7526a, lja-miR7526b, lja-miR7526c, lja-miR7526d, lja-miR7526e, lja-miR7526f, lja-miR7526g, lja-miR7526h, gra-miR8677
	14	ptc-miR395a, osa-miR2106, aqc-miR395b, aqc-miR395a, esi-miR3454g-5p, ahy-miR3514-3p, nta-miR6163, sbi-miR5568f-5p, mes-miR395e, bdi-miR7779-3p, rgl-miR7798, ath-miR8172, gra-miR8714, ata-miR2275b-5p
CLPD1 Os02g0526400 LOC_Os02g32520 P0458B05.10	14	ptc-miR476b, smo-miR1111, gma-miR1514b-5p, osa-miR2095-3p, gma-miR2108b, zma-miR159f-5p, hme-miR-2788-5p, bdi-miR5172-3p, osa-miR5514, nta-miR6025a, stu-miR6025, nta-miR6161a, nta-miR6161b, ptc-miR7823
CLPD2 Os04g0405000 LOC_Os04g33210 OJ000315_02.14	14	ath-miR405a, ath-miR405b, ath-miR405d, ppt-miR1061-3p, aly-miR4226, aau-miR160, osa-miR5536, sbi-miR5565f, stu-miR6026-5p, nta-miR1919, hvu-miR5048b, hme-miR-190, mtr-miR2592bp-3p, bdi-miR5181e
FIGL1 At3g27120 MOJ10.20	14	ath-miR846-5p, smo-miR1112-3p, mtr-miR2089-3p, aly-miR399b-5p, aly-miR781-3p, gma-miR5371-5p, mtr-miR5746, nta-miR6161a, nta-miR6161b, han-miR3630-3p, bdi-miR7741-5p.2, bdi-miR7748a-5p, gra-miR8777, ata-miR399a-5p
HSPRO2 At2g40000 T28M21.16	14	zma-miR399f-5p, vvi-miR395n, mtr-miR2609a, mtr-miR2609b, aly-miR163-5p.2, aly-miR3444a-3p, ath-miR841b-3p, aly-miR3444b, csi-miR1515, ath-miR5028, mtr-miR5228, mtr-miR5252, hme-miR-928, bdi-miR7712-5p
RPL7A-1 Os08g0326400 LOC_Os08g23710 OJ1136_A10.108 P0703C03.43	14	smo-miR1087, cre-miR1161a, cre-miR1161b, gma-miR4408, bdi-miR5173-3p, mtr-miR5288, ath-miR833b, osa-miR6255, mdm-miR7127a, mdm-miR7127b, bdi-miR7717c-5p, ptc-miR7826, gra-miR7505b, bra-miR9408-5p
AVT1C At2g39130 T16B24.23 T7F6.1	14	ppt-miR1035, mtr-miR2607, mtr-miR2615a, mtr-miR2615b, mtr-miR2615c, mtr-miR2642, gma-miR5763a, gma-miR5763b, gma-miR5776, gma-miR5763c, osa-miR6251, hme-miR-8, stu-miR8019-5p, gma-miR5780c
AVT1C At2g39130 T16B24.23 T7F6.1	14	ppt-miR1023c-3p, mtr-miR2621, zma-miR399g-3p, zma-miR399g-3p, sbi-miR399k, sbi-miR399k, hvu-miR5049a, mtr-miR2592bl-5p, gma-miR5767, hbr-miR159b, gra-miR8671, gra-miR8697, gra-miR7494e, gra-miR7494f
P5CS	14	mtr-miR1507-3p, aly-miR781-3p, ahy-miR3512, gma-miR4400, mtr-miR5257, mtr-miR5272f, sly-miR6027-3p, stu-miR6027, cca-miR6103-5p, hme-miR-2797, bdi-miR7707-3p, stu-miR8016, tae-miR7757-5p, ata-miR9674c-5p
AVPL2 At1g16780 F17F16.2	13	osa-miR1423-5p, mtr-miR2659a, mtr-miR2659b, mtr-miR2659c, mtr-miR2659d, mtr-miR2659e, mtr-miR2659f, gma-miR394a-3p, mtr-miR2659g, mtr-miR2659h, mtr-miR2659i, mtr-miR2659j, mtr-miR2659k
AVPL2 At1g16780 F17F16.2	13	ath-miR170-5p, ath-miR171a-5p, osa-miR820a, osa-miR820b, osa-miR820c, aly-miR170-5p, aly-miR171a-5p, gma-miR171j-5p, osa-miR5833, hme-miR-6306-5p, stu-miR171a-5p, stu-miR171c-5p, tae-miR9778
Os03g0134300 LOC_Os03g04169 OJ1006F06.12 OJ1006F06.14	13	ath-miR161.2, smo-miR156b, aly-miR159a-5p, aly-miR161-5p.2, aly-miR859-3p, gma-miR156r, hbr-miR156, mdm-miR156p, mdm-miR156q, mdm-miR156r, mdm-miR156s, cme-miR169t, gma-miR9741
GAE6 UGlcAE2 At3g23820 F14O13.1	13	ath-miR846-5p, ppt-miR1023a-5p, ppt-miR1023b-5p, cre-miR1153-3p.1, osa-miR1853-5p, osa-miR2099-3p, mtr-miR5279, ath-miR5996, hme-miR-2a, hme-miR-2b, sbi-miR6218-3p, ghr-miR7490, gma-miR9755
SAUR32 AAM1 At2g46690	13	mtr-miR169k, osa-miR5529, sbi-miR6222-3p, stu-miR8032a-5p, stu-miR8032b-5p, stu-miR8032c, stu-miR8032d-5p, stu-miR8032e-5p, stu-miR8032f-5p, stu-miR8032g-5p, gra-miR8717, ata-miR9772a-3p, ata-miR9772b-3p
SAUR32 AAM1 At2g46690	13	osa-miR5529, sbi-miR6222-3p, stu-miR8032a-5p, stu-miR8032b-5p, stu-miR8032c, stu-miR8032d-5p, stu-miR8032e-5p, stu-miR8032f-5p, stu-miR8032g-5p, gra-miR8717, tae-miR9666a-3p, ata-miR9772a-3p, ata-miR9772b-3p
CPK8 Os03g0808600 LOC_Os03g59390 OsJ_13049 OSJNBa0028F23.27 OSJNBa0060M17.7	13	ppt-miR898a-3p, cre-miR906-3p, ppt-miR1036-3p, osa-miR2104, aqc-miR408, zma-miR529-3p, aly-miR161-3p.2, bdi-miR529-3p, mtr-miR5256, gma-miR408a-5p, gma-miR408c-5p, bra-miR1885b, ptc-miR6461
GT-2 At1g76890 F7O12.6	13	osa-miR812a, osa-miR812b, osa-miR812c, osa-miR812d, osa-miR812e, smo-miR1101-5p, aly-miR3446-5p, osa-miR3979-5p, osa-miR3981-3p, bdi-miR5176-3p, gma-miR5037c, gra-miR8725, tae-miR1120c-5p
AIR3 SBT5.3 At2g04160 F3L12 T16B23	13	osa-miR5495, osa-miR5832, ptc-miR7828, gra-miR7492e, gra-miR7492g, gra-miR7492h, gra-miR7492i, gra-miR7492j, gra-miR7492k, gra-miR8732, gra-miR7494e, gra-miR7494f, gra-miR7492f
FFC CPSRP54 At5g03940 F8F6_150	13	ath-miR862-3p, mtr-miR2586a, aly-miR862-3p, ghr-miR7510a, gra-miR7492e, gra-miR7492g, gra-miR7492h, gra-miR7492i, gra-miR7492j, gra-miR7492k, gra-miR7494e, gra-miR7494f, gra-miR7492f
FFC CPSRP54 At5g03940 F8F6_150	13	ptc-miR477a-5p, ptc-miR477b, osa-miR1859, osa-miR1862d, aly-miR172a-5p, aly-miR399g-5p, aly-miR399i-5p, ath-miR5662, bdi-miR5167b-3p, stu-miR156g-3p, gra-miR8645, sly-miR156e-3p, bra-miR408-3p
MADS2 MADS Os01g0883100 LOC_Os01g66030 B1065E10.30 OsJ_04312	13	pta-miR952b, osa-miR1861a, gma-miR394b-3p, bdi-miR408-5p, nta-miR6146a, pde-miR952a, pde-miR952b, bdi-miR5185l-3p, stu-miR397-3p, osa-miR1861o, gra-miR8694a, gra-miR8694b, sly-miR394-3p
ATL72 At3g10910 T7M13.1	13	pta-miR952b, osa-miR1861a, gma-miR394b-3p, bdi-miR408-5p, nta-miR6146a, pde-miR952a, pde-miR952b, bdi-miR5185l-3p, stu-miR397-3p, osa-miR1861o, gra-miR8694a, gra-miR8694b, sly-miR394-3p
ATL72 At3g10910 T7M13.1	13	zma-miR159c-5p, zma-miR159d-5p, ptc-miR159c, ath-miR1886.1, osa-miR2120, zma-miR159g-5p, zma-miR159h-5p, zma-miR159h-3p, zma-miR159i-5p, zma-miR159i-3p, bdi-miR159a-5p, bdi-miR169h-3p, stu-miR1886g-5p
EXO70B1 At5g58430 MQJ2.3	13	ath-miR164b-3p, aly-miR164b-3p, gma-miR4412-5p, csi-miR482a-5p, sbi-miR5385, bdi-miR7714-5p, bdi-miR7719-5p, bdi-miR7768a-3p, bdi-miR7768b-3p, ptc-miR6462e, gma-miR9725, gma-miR9741, ata-miR164c-3p
EXO70B1 At5g58430 MQJ2.3	13	ptc-miR171l-3p, ptc-miR171m, ptc-miR171j, gma-miR171b-3p, csi-miR171b, gma-miR171h, mtr-miR171h, mtr-miR171g, gma-miR171r, gma-miR171s, lja-miR171c, stu-miR7984d-3p, cpa-miR8151
KAS3B	13	ath-miR390a-3p, ptc-miR390d-3p, gma-miR390a-3p, aly-miR390a-3p, gma-miR390c, osa-miR5511, nta-miR6020b, mes-miR390, lja-miR390a-3p, lja-miR390b-3p, stu-miR7993b-5p, sly-miR390a-3p, sly-miR390b-3p
KAS3B	13	ppt-miR1037, mtr-miR2593a, mtr-miR2593b, mtr-miR2593c, ghr-miR827a, ghr-miR827b, ghr-miR827c, aly-miR827-3p, csi-miR827, tcc-miR827, osa-miR5144-3p, mdm-miR827, mes-miR827
FIM5 FIM2 At5g35700 MXH1.5	13	ath-miR167a-3p, ath-miR164c-3p, cre-miR1161a, gma-miR1526, aly-miR167a-3p, aly-miR1887, cre-miR1161b, bdi-miR5064, bra-miR164b-3p, bra-miR164d-3p, bra-miR164c-3p, ata-miR9674c-5p, ata-miR9674b-3p
TIC56 At5g01590 F7A7_110	13	ath-miR860, mtr-miR2595, aly-miR860-3p, pab-miR3706, csi-miR3948, gma-miR862b, hvu-miR5049e, ptc-miR477d-3p, gra-miR8738a, gra-miR8738b, gra-miR8768, sly-miR167b-3p, sly-miR9476-5p
QKY At1g74720 F1M20.40 F25A4.30	13	mtr-miR1507-3p, esi-miR3454f-3p, esi-miR3454b-3p, pab-miR950-5p, bdi-miR5065, mtr-miR5276, mtr-miR5276, osa-miR5484, hvu-miR6196, sbi-miR6227-5p, stu-miR8044-3p, gra-miR8768, bra-miR408-3p
RPL35	13	osa-miR169d, zma-miR156b-3p, ath-miR827, ppt-miR1044-3p, mtr-miR2594, osa-miR1863b.2, ghr-miR2949a-3p, aly-miR161-5p.1, pab-miR3700, gma-miR4397-3p, mdm-miR827, bdi-miR169l, gma-miR9763
AGT1 At2g13360 F14O4.7	13	osa-miR439a, osa-miR439b, osa-miR439c, osa-miR439d, osa-miR439e, osa-miR439f, osa-miR439g, osa-miR439h, osa-miR439i, bdi-miR395c-5p, bdi-miR395k-5p, osa-miR5806, bdi-miR395p-5p
AGT1 At2g13360 F14O4.7	13	osa-miR528-5p, zma-miR528a-5p, zma-miR528b-5p, sbi-miR528, aly-miR781-3p, bdi-miR528-5p, ssp-miR528, mtr-miR5242, mtr-miR5037a, mtr-miR5037b, mtr-miR5037c, sbi-miR6235-5p, ata-miR528-5p
AGT1 At2g13360 F14O4.7	13	ath-miR161.2, ppt-miR1047-5p, mtr-miR2602a, mtr-miR2602b, aly-miR161-5p.2, aly-miR4241, bdi-miR5069, mtr-miR5214-5p, gma-miR5775, mtr-miR7698-5p, bdi-miR5163b-5p, stu-miR7986, ata-miR9674a-3p
AGT1 At2g13360 F14O4.7	13	osa-miR396e-3p, mtr-miR2608, aly-miR773b-5p, bdi-miR396b-3p, mtr-miR5221, mtr-miR5555-5p, hvu-miR6192, ptc-miR6426a, ptc-miR6426b, sbi-miR5568e-3p, bdi-miR7765-3p, ptc-miR7833, ata-miR396d-3p
AGT1 At2g13360 F14O4.7	13	osa-miR393b-3p, zma-miR393a-3p, zma-miR393c-3p, aly-miR4241, ath-miR5029, bdi-miR393b-3p, nta-miR479b, tae-miR1122c-3p, tae-miR1130b-3p, tae-miR530, ata-miR393-3p, ata-miR9776-5p, ata-miR9783-5p
ACP4 ACL1.4 At4g25050 F13M23.190	13	osa-miR166i-3p, gma-miR482a-5p, aly-miR319a-5p, bra-miR1885b, mdm-miR7123a, mdm-miR7123b, sbi-miR6224a-5p, sbi-miR6224b-5p, sbi-miR6224c-5p, rgl-miR7798, rgl-miR7802, gra-miR8685, bra-miR319-5p
ACP4 ACL1.4 At4g25050 F13M23.190	13	osa-miR1866-3p, osa-miR1846c-3p, zma-miR395k-5p, aly-miR395g-5p, bdi-miR395j-5p, ath-miR833b, osa-miR6249a, osa-miR6249b, bra-miR408-3p, bra-miR395d-5p, bra-miR395b-5p, bra-miR395c-5p, bra-miR395a-5p
RRA2 At1g75110 F9E10.4	13	ath-miR156h, smo-miR156c, osa-miR2106, zma-miR398b-5p, aly-miR156h-5p, aly-miR163-3p.2, esi-miR3451-5p, gma-miR4353, mtr-miR5209, ath-miR5654-5p, hvu-miR6205, cpa-miR8148, tae-miR1120c-5p
SAP8 SAP3 Os06g0612800 LOC_Os06g41010 OsJ_021110 P0417G12.11 P0429G06.28	13	osa-miR167e-3p, osa-miR167i-3p, zma-miR167h-3p, zma-miR167i-3p, gma-miR1522, gma-miR1528, aqu-miR-2015-5p, osa-miR2100-3p, aly-miR3441-3p.1, ath-miR841b-3p, gma-miR5031, bdi-miR167d-3p, gma-miR9728
LRK10	13	sbi-miR169d-3p, smo-miR1108, aly-miR827-5p, aly-miR3433-5p, esi-miR3460-5p, bdi-miR169h-3p, bdi-miR827-5p, osa-miR6256, ptc-miR6449, ddi-miR-7131b, stu-miR827-5p, gra-miR8641, ata-miR169c-3p
RH17 Os05g0110500 LOC_Os05g01990 OsJ_16855 P0016H04.6	13	mtr-miR2666, zma-miR398a-3p, zma-miR398b-3p, sbi-miR398, tae-miR398, mtr-miR5560-3p, mdm-miR7120a, mdm-miR7120a, mdm-miR7120b, mdm-miR7120b, ata-miR160a-3p, ata-miR398f-3p, ata-miR398g-3p
RH17 Os05g0110500 LOC_Os05g01990 OsJ_16855 P0016H04.6	13	ppt-miR1222e, aqu-miR-2015-3p, mtr-miR2593a, mtr-miR2593b, mtr-miR2593c, aly-miR829-3p, ahy-miR3517, hvu-miR1120, osa-miR812n-5p, mtr-miR5742, mtr-miR7701-5p, ptc-miR7825, stu-miR8035
CYSK	13	osa-miR319a-3p.2-3p, osa-miR319b, sbi-miR319a, zma-miR319a-3p, zma-miR319c-3p, zma-miR319b-3p, zma-miR319d-3p, ppt-miR1073-5p, osa-miR2093-3p, sbi-miR319b, cca-miR6107, stu-miR8050-5p, gra-miR8634
CYSK	13	ath-miR407, ptc-miR164f, mtr-miR164d, vvi-miR164b, rco-miR164d, pab-miR3698, bgy-miR156, bcy-miR156, tcc-miR164c, nta-miR164c, mes-miR164d, stu-miR164-5p, gra-miR8653b
B'KAPPA At5g25510 T14C9.50	13	osa-miR166a-5p, osa-miR166c-5p, osa-miR166e-5p, zma-miR166g-5p, zma-miR166b-5p, zma-miR166d-5p, pab-miR3693, bdi-miR166d-5p, bdi-miR166c-5p, bdi-miR5184, bra-miR158-5p, ata-miR166a-5p, ata-miR166e-5p
DJ1B At1g53280 F12M16.18	13	osa-miR156c-3p, osa-miR156g-3p, zma-miR156a-3p, ath-miR865-3p, ppt-miR1027a, ppt-miR1027b, gma-miR4350, bdi-miR156e-3p, bdi-miR7754-3p, gra-miR7504k, gra-miR7504l, gra-miR7504m, ata-miR156b-3p
DJ1B At1g53280 F12M16.18	13	ptc-miR399c, mtr-miR171b, vvi-miR171b, vvi-miR399d, rco-miR399f, gma-miR862b, cme-miR171h, lja-miR171b, bdi-miR7713-3p, ptc-miR7817a, sly-miR9469-5p, bra-miR9569-3p, gma-miR9725
U2AF65A	13	osa-miR171g, sbi-miR171c, zma-miR171g-3p, ath-miR447a.2-3p, ppt-miR1071-5p, osa-miR2878-5p, pab-miR482b, gma-miR4380b, ath-miR5026, mtr-miR5239, osa-miR5813, ptc-miR6451, sly-miR5302b-3p
U2AF65A	13	zma-miR159g-3p, tcc-miR399f, gma-miR319d, bdi-miR5183, mtr-miR2670f, mtr-miR2670g, gma-miR319i, hme-miR-278, osa-miR7695-3p, gra-miR8663b, gra-miR8699, hvu-miR397b-3p, gma-miR319o
	13	vvi-miR169i, osa-miR1428e-5p, osa-miR1428f-5p, osa-miR1428g-5p, vvi-miR3640-5p, gma-miR1520f-5p, bna-miR6033, hme-miR-6302-3p, hbr-miR6485, ddi-miR-7095-5p, lja-miR7541, lja-miR7541, ptc-miR7817b
	13	ath-miR398b-3p, ath-miR398c-3p, ath-miR842, ath-miR864-3p, ppt-miR477f, ppt-miR477g-5p, osa-miR531b, mtr-miR2119, aly-miR398b-3p, aly-miR842-3p, ahy-miR398, pab-miR3698, bra-miR398-3p
PPC2	13	ath-miR398b-5p, ath-miR398c-5p, ppt-miR1072, aly-miR771-3p, vvi-miR3625-5p, gma-miR4374b, osa-miR5081, bra-miR5712, mtr-miR5752a, mtr-miR5752b, sly-miR6027-3p, stu-miR6027, ptc-miR6475
	13	ath-miR161.2, osa-miR396c-3p, osa-miR1854-5p, mtr-miR1507-3p, mtr-miR2636, mtr-miR2645, zma-miR396f-3p, aly-miR161-5p.2, esi-miR3460-3p, bdi-miR396e-3p, stu-miR8047, gra-miR8640, ata-miR396c-3p
PSBR	13	cre-miR909.3, pta-miR398, ppt-miR1067, aqu-miR-2014-5p, osa-miR2105, aly-miR395d-5p, gma-miR5033, bdi-miR5169a, bdi-miR5170, osa-miR5495, bdi-miR7741-3p.2, bdi-miR7772-3p, bdi-miR5169b
PSBR	13	osa-miR319a-5p, gma-miR1521a, mtr-miR2635, zma-miR395k-5p, gma-miR1520f-3p, gma-miR1520g, gma-miR1520k, gma-miR1520n, mtr-miR7698-5p, gra-miR8767a, gra-miR8767b, bra-miR9408-3p, tae-miR9652-3p
PSBR	13	zma-miR166k-5p, gma-miR1522, aqc-miR408, pab-miR3699, gma-miR4368b, sbi-miR5564a, ghr-miR7486b, mtr-miR7699-3p, bdi-miR159b-5p.2, bdi-miR166h-5p, stu-miR8041a-3p, stu-miR8041b-3p, bdi-miR9487
ECT2 At3g13460 MRP15.12	13	ath-miR780.2, mtr-miR2632a, mtr-miR2632b, mtr-miR2632c, aly-miR3444b, osa-miR5144-3p, rgl-miR5575, ath-miR5650, stu-miR482a-5p, hbr-miR6172, bdi-miR159b-3p.3, bdi-miR7754-3p, stu-miR8047
PLS1	13	gma-miR1530, mtr-miR2118, gma-miR4398, gma-miR482c-3p, sly-miR482a, stu-miR482a-3p, nta-miR482a, nta-miR482c, pde-miR952a, pde-miR952b, pde-miR952c, ghr-miR7486a, ghr-miR7486b
PLS1	13	gma-miR1530, mtr-miR2118, gma-miR4398, gma-miR482c-3p, sly-miR482a, stu-miR482a-3p, nta-miR482a, nta-miR482c, pde-miR952a, pde-miR952b, pde-miR952c, ghr-miR7486a, ghr-miR7486b
Os07g0103200 LOC_Os07g01320 OsJ_22784 P0446F04.109	13	ath-miR159b-5p, gma-miR159a-5p, ath-miR779.1, cre-miR909.2, aly-miR159a-5p, aly-miR159b-5p, mtr-miR5278, gma-miR159e-5p, ath-miR5660, hvu-miR6180, ptc-miR6432, mdm-miR319c, bdi-miR9492
Os07g0103200 LOC_Os07g01320 OsJ_22784 P0446F04.109	13	ptc-miR475a-5p, ptc-miR475b-5p, ptc-miR475d-5p, mtr-miR2607, bdi-miR5200c, mtr-miR5212-3p, mtr-miR5214-5p, ath-miR5628, hvu-miR6200, bdi-miR5181c-3p, bdi-miR7740-5p, stu-miR7984b-3p, esi-miR8628
GLR3.3 At1g42540 T8D8.1	13	ptc-miR172i, mtr-miR172a, bdi-miR172d, mtr-miR2640, sbi-miR172f, ghr-miR172, tcc-miR172d, ath-miR5632-3p, bra-miR5716, bdi-miR7712-3p, ptc-miR7826, stu-miR8019-5p, stu-miR172c-3p
BIR2 At3g28450 MFJ20.14	13	ath-miR858a, ppt-miR536f, ppt-miR1064-3p, smo-miR1092, osa-miR2099-3p, aly-miR858-5p, gma-miR4411, osa-miR5490, hme-miR-283, ptc-miR6436, ptc-miR828b-3p, bdi-miR9485, tae-miR9652-3p
SLN1	13	ath-miR858a, ppt-miR536f, ppt-miR1064-3p, smo-miR1092, osa-miR2099-3p, aly-miR858-5p, gma-miR4411, osa-miR5490, hme-miR-283, ptc-miR6436, ptc-miR828b-3p, bdi-miR9485, tae-miR9652-3p
MYB52 AHS1 At1g17950 F2H15.17	13	ath-miR157a-3p, ath-miR157b-3p, cre-miR1168.1, osa-miR2864.2, aly-miR157a-3p, pab-miR3699, rgl-miR5142, ath-miR5645a, ath-miR5645b, ath-miR5645d, ath-miR5645f, ath-miR5645e, osa-miR1319b
MYB105 LOF2 At1g69560 F10D13.19 F24J1.31	13	zma-miR156k-3p, gma-miR2109-3p, mtr-miR2592s-3p, aly-miR857-5p, mtr-miR5236a, mtr-miR5236b, mtr-miR5236c, mtr-miR5236d, mtr-miR5236e, sbi-miR5389, mtr-miR2592bq-3p, sly-miR156e-5p, tae-miR9667-5p
HSFA5 HSF06 Os02g0496100 LOC_Os02g29340 P0040H05.33	13	osa-miR166b-5p, zma-miR166a-5p, zma-miR166i-5p, cre-miR1147.1, bdi-miR166b-5p, bdi-miR7786-5p, stu-miR5303c, stu-miR5303a, stu-miR5303b, stu-miR5303d, stu-miR5303f, gra-miR5207, ata-miR166d-5p
APR3 PRH26 At4g21990 F1N20.90	13	ath-miR402, mtr-miR2680a, mtr-miR2680b, mtr-miR2680c, mtr-miR2680d, mtr-miR2680e, aqc-miR171e, bdi-miR5060, ath-miR5664, mtr-miR5754, gma-miR5777, gra-miR7506b, gma-miR9723
KOB1 Os02g0817500 LOC_Os02g57240 OJ1136_C12.15 P0643F09.35	13	ath-miR858a, aly-miR858-5p, ath-miR858b, gma-miR5667-5p, cca-miR396c, mdm-miR858, cme-miR858, ghr-miR7510b, stu-miR7979, stu-miR396-3p, stu-miR169f-3p, bdi-miR9483a, bdi-miR9483b
IDH1	13	osa-miR2055, bdi-miR5185a-5p, bdi-miR5185b-5p, gma-miR5678, bdi-miR5185c-5p, bdi-miR5185d-5p, bdi-miR5185e-5p, bdi-miR5185f-5p, bdi-miR5185g-5p, bdi-miR5185h-5p, bdi-miR5185i-5p, bdi-miR5185j-5p, bdi-miR5185k-5p
QQT1 EMB1705 At5g22370 MWD9.17	13	ath-miR160c-3p, ath-miR837-3p, mtr-miR2639, aly-miR163-3p.2, aly-miR774b-3p, gma-miR5373, hme-miR-998, ptc-miR6471, bdi-miR7716-5p, bdi-miR7717b-5p, bdi-miR7776-3p.1, rgl-miR7972, gra-miR8688
PARV12.8	13	ppt-miR319d-5p.2, osa-miR815a, osa-miR815b, osa-miR815c, gma-miR4357, osa-miR812n-5p, bdi-miR166g-3p, hme-miR-283, ddi-miR-7096, bdi-miR7720-3p, bdi-miR7786-3p, stu-miR319a-5p, hbr-miR9387
XTH30 XTR4 At1g32170 F3C3.5	13	osa-miR531a, osa-miR531b, osa-miR812f, osa-miR812g, osa-miR812h, osa-miR812i, osa-miR812j, aly-miR834-5p, gma-miR5369, osa-miR812p, stu-miR8008a, stu-miR8009, osa-miR531c
CRR2 PCMP-H54 At3g46790 T6H20.180	13	osa-miR395t, osa-miR395c, zma-miR395c-3p, vvi-miR395n, sbi-miR395k, mtr-miR2621, zma-miR395l-3p, zma-miR395m-3p, osa-miR5501, ssl-miR395, bdi-miR395p-3p, tae-miR1847-5p, ata-miR9776-5p
	13	ath-miR829-3p.2, mtr-miR2592b-5p, mtr-miR2592s-5p, aly-miR3444a-5p, vvi-miR3626-3p, pab-miR3709a, bdi-miR5200c, mtr-miR5260, bra-miR5721, cca-miR6118-5p, stu-miR1886g-5p, ath-miR8179, sly-miR5302b-3p
At2g37660 F13M22.16	13	vvi-miR3633a-3p, bdi-miR408-5p, vun-miR164, ptc-miR6471, cpa-miR164d, cpa-miR164e, ath-miR8167a, ath-miR8167b, ath-miR8167c, bra-miR9554-3p, ath-miR8167d, ath-miR8167e, ath-miR8167f
SARED1	13	mtr-miR395k, osa-miR2932, aly-miR3441-3p.1, bdi-miR395d-3p, osa-miR5524, osa-miR5533, ath-miR5659, osa-miR5827, hbr-miR476, pde-miR950, lja-miR7519, stu-miR8015-3p, tae-miR1137b-5p
PTAC10 PAP3 PDE312 TAC10 At3g48500 T29H11_270 T8P19.10	13	ptc-miR167h-5p, ath-miR844-5p, smo-miR1105, mtr-miR2658, osa-miR2863a, aly-miR840-5p, gma-miR4359b, sbi-miR5568f-5p, cpa-miR8148, gra-miR8703a, gra-miR8703b, gra-miR8703c, gma-miR167k
PTAC10 PAP3 PDE312 TAC10 At3g48500 T29H11_270 T8P19.10	13	ath-miR397b, zma-miR166k-5p, bna-miR397a, bna-miR397b, osa-miR1857-3p, osa-miR2092-3p, osa-miR2867-5p, zma-miR166n-5p, ath-miR5640, bna-miR2111c, nta-miR6150, lja-miR7543, bra-miR2111-5p
At4g17486 dl4780c FCAALL.234	13	ath-miR160c-3p, osa-miR169d, ptc-miR169y, vvi-miR169v, osa-miR5149, bdi-miR5179, osa-miR5179, cme-miR169g, sbi-miR6222-5p, sbi-miR6225-3p, ghr-miR160, bdi-miR169l, bdi-miR5200b-5p
At1g79080 YUP8H12R.30	13	zma-miR319a-5p, zma-miR319c-5p, osa-miR1846a-3p, osa-miR1846b-3p, pta-miR1311, ath-miR4228-5p, pab-miR1311, mtr-miR5557-5p, ath-miR5637, gma-miR5775, pde-miR1311, bdi-miR7780-3p, ata-miR399b-5p
At1g79080 YUP8H12R.30	13	ptc-miR475a-5p, ptc-miR475b-5p, ptc-miR475d-5p, ath-miR834, aly-miR834-3p, vvi-miR3636-5p, osa-miR2275d, nta-miR6145b, nta-miR6145d, ptc-miR6452, bdi-miR7786-5p, stu-miR398a-5p, gra-miR8720
NDB1	13	mtr-miR2086-3p, mtr-miR2625, ahy-miR3511-3p, pab-miR3712, aau-miR2086, amg-miR2086, nta-miR6153, nta-miR6162, hme-let-7, stu-miR8029, stu-miR167d-3p, ath-miR8170-3p, tae-miR9656-3p
TIF3C1 AM3-1	13	ath-miR844-3p, ppt-miR1071-5p, smo-miR1085-5p, smo-miR1101-5p, osa-miR2103, gma-miR4413a, gma-miR4414-3p, mtr-miR4414a-3p, mtr-miR5285b, gma-miR4413b, mtr-miR5555-3p, mtr-miR5561-3p, ptc-miR6466-3p
LHCB4.2 At3g08940 T16O11.12	13	ahy-miR3512, aly-miR4235, gma-miR4400, far-miR437, far-miR437, mtr-miR5289a, mtr-miR5289b, mtr-miR5292a, pti-miR5477, ptc-miR6450a, bdi-miR7711-5p.3, bdi-miR7726b-5p, bdi-miR7773-3p
ABF2 AREB1 BZIP36 At1g45249 T2P3	13	cre-miR905-5p, sbi-miR1432, zma-miR1432-5p, osa-miR2928, ssp-miR1432, osa-miR5793, nta-miR6162, hme-miR-993, sly-miR168a-3p, lja-miR7540a, lja-miR7540b, gra-miR8723b, tae-miR9661-5p
At4g17830 dl4945w T6K21	12	gma-miR1528, osa-miR1849, pta-miR1311, mtr-miR2603, aly-miR774a-3p.1, pab-miR1311, bdi-miR5174a, pde-miR1311, mtr-miR397-3p, bdi-miR5174e-5p.1, bdi-miR5163b-5p, bdi-miR5174b-5p
At4g17830 dl4945w T6K21	12	osa-miR438, mtr-miR171a, osa-miR1854-3p, aly-miR3443-5p, vvi-miR3625-5p, gma-miR4382, osa-miR5145, gma-miR5368, bdi-miR7768a-3p, bdi-miR7768b-3p, stu-miR7997a, stu-miR7997b
BSPA	12	aly-miR3442-3p, ath-miR3434-5p, osa-miR5533, gma-miR5672, gma-miR2111a, gma-miR2111d, ath-miR5996, sbi-miR5568f-5p, bdi-miR7782-5p, stu-miR8022, stu-miR8033-5p, bra-miR9565-3p
HSF8	12	osa-miR156c-3p, osa-miR156f-3p, osa-miR156g-3p, osa-miR156h-3p, osa-miR156l-3p, zma-miR156d-3p, zma-miR156f-3p, zma-miR156g-3p, zma-miR156a-3p, zma-miR156k-3p, bdi-miR156e-3p, ata-miR156b-3p
MBD1 At4g22745 T12H17.130	12	smo-miR171c, ctr-miR171, osa-miR5155, osa-miR5155, gma-miR171m, gma-miR171t, osa-miR5812, mdm-miR171a, mdm-miR171b, mtr-miR7697-3p, stu-miR171b-3p, sly-miR171e
MBD1 At4g22745 T12H17.130	12	ppt-miR414, smo-miR1092, smo-miR1101-3p, mtr-miR2649, osa-miR6251, bdi-miR7716-3p, bdi-miR7782-5p, ptc-miR7827, gra-miR8652, sly-miR5302b-5p, gma-miR9724, gma-miR9758
At1g49730 F14J22.6	12	osa-miR172d-5p, zma-miR172c-5p, mtr-miR2086-5p, aly-miR4243, bdi-miR172a-5p, gma-miR172g, mtr-miR5274b-3p, ath-miR5630a, ath-miR5630b, mdm-miR482b, gra-miR8686, ata-miR172b-5p
ATP1 PDL1 SDIRIP1 At5g51110 MWD22.5	12	ppt-miR533a-3p, ppt-miR533b-3p, ppt-miR533c, ppt-miR533d, mtr-miR2585a, mtr-miR2585b, mtr-miR2585c, mtr-miR2585d, ptc-miR6454, mdm-miR535b, mdm-miR535c, ghr-miR7506
RhGT1	12	ppt-miR533a-3p, ppt-miR533b-3p, ppt-miR533c, ppt-miR533d, mtr-miR2585a, mtr-miR2585b, mtr-miR2585c, mtr-miR2585d, ptc-miR6454, mdm-miR535b, mdm-miR535c, ghr-miR7506
ATJ49 C49 At5g49060 K19E20.16 K20J1_3	12	ath-miR863-3p, smo-miR1095a, smo-miR1095b, osa-miR1426, osa-miR2095-5p, mtr-miR2111m-3p, aly-miR859-3p, gma-miR156g, osa-miR5522, bra-miR5725, nta-miR6144, gra-miR8693
At3g52155 F4F15.260	12	aly-miR169h-3p, aly-miR169i-3p, aly-miR169j-3p, aly-miR169k-3p, aly-miR169l-3p, aly-miR169m-3p, aly-miR169n-3p, bdi-miR169e-3p, osa-miR6246, hme-miR-190, gra-miR8663b, ata-miR169i-3p
ALMT3 At1g18420 F15H18.9	12	ath-miR417, smo-miR1113, cre-miR1153-3p.1, csi-miR3947-5p, gma-miR171i-5p, mtr-miR5212-3p, osa-miR5814, gra-miR8702, tae-miR9672a-3p, gma-miR9733, tae-miR9672b, ata-miR9672-3p
ALMT9 At3g18440 MYF24.16	12	ppt-miR1064-3p, aly-miR3445-5p.1, stu-miR7981-3p, gra-miR8639a, gra-miR8639b, gra-miR8639c, gra-miR8639f, gra-miR8639g, gra-miR8639h, gra-miR8639i, gra-miR8639d, gra-miR8639e
PMP22 At4g04470 T26N6.9	12	ppt-miR1064-3p, aly-miR3445-5p.1, stu-miR7981-3p, gra-miR8639a, gra-miR8639b, gra-miR8639c, gra-miR8639f, gra-miR8639g, gra-miR8639h, gra-miR8639i, gra-miR8639d, gra-miR8639e
TIC32 HP32 IEP32	12	ppt-miR1214, zma-miR396g-5p, zma-miR396h, gra-miR482, osa-miR5835, stu-miR482e-3p, sly-miR482c, cca-miR396b, bdi-miR7768a-5p, bdi-miR7768b-5p, gra-miR8674a, tae-miR1122c-3p
TRM13 Os03g0833200 LOC_Os03g61750 OSJNBa0078D06.36 OSJNBa0096I06.32	12	ppt-miR1061-3p, ppt-miR1023e-3p, osa-miR396f-3p, esi-miR3469-5p, ath-miR5660, gma-miR5667-3p, hvu-miR5049b, ptc-miR6447, sbi-miR5568g-5p, ath-miR8177, esi-miR8618a, gma-miR9754
At5g46170 MCL19.23	12	ppt-miR1039-5p, gma-miR1516a-5p, osa-miR1882a, osa-miR1882b, osa-miR1882c, osa-miR1882d, osa-miR1882e-5p, osa-miR1882f, osa-miR1882g, osa-miR1882h, ath-miR5664, bra-miR9566-5p
At5g46170 MCL19.23	12	osa-miR820a, osa-miR820b, osa-miR820c, ppt-miR1046-3p, smo-miR1112-5p, mtr-miR2592a-3p, aly-miR846-5p, mtr-miR5246, hbr-miR6170, hvu-miR6209, gra-miR7502b, gra-miR7502c
At1g56220 F14G9.17	12	osa-miR390-3p, mtr-miR319a-5p, bdi-miR1135, zma-miR390a-3p, zma-miR390b-3p, esi-miR3454a-3p, esi-miR3454e-3p, osa-miR3981-3p, gma-miR5041-3p, bdi-miR390a-3p, ath-miR5663-5p, ata-miR390-3p
At1g54070 F15I1.15	12	ppt-miR1059, tae-miR1134, sly-miR1919a, sly-miR1919b, sly-miR1919c-3p, mtr-miR2088-5p, aly-miR3433-5p, far-miR1134, gma-miR5668, hme-miR-2a, hme-miR-2b, stu-miR1919-3p
At1g54070 F15I1.15	12	ath-miR164b-3p, aly-miR164b-3p, gma-miR4412-5p, csi-miR482a-5p, bdi-miR7714-5p, bdi-miR7719-5p, bdi-miR7768a-3p, bdi-miR7768b-3p, ptc-miR6462e, gma-miR9725, gma-miR9741, ata-miR164c-3p
MADS50 AGL20 SOC1 Os03g0122600 LOC_Os03g03070 OJ1126B12.8	12	ath-miR852, aly-miR781-3p, ath-miR4227, gma-miR4372a, mdm-miR482d, bdi-miR7721-3p, stu-miR8005a, stu-miR8005b-3p, stu-miR8005c, stu-miR1886h, stu-miR1886i-3p, stu-miR8040-5p
UNG At3g18630 K24M9.12	12	osa-miR171h, zma-miR171h-3p, sbi-miR171f, vvi-miR482, osa-miR2925, pab-miR482c, gma-miR4382, gma-miR4996, gma-miR5037a, mtr-miR2670e, pde-miR482a, gra-miR8664
CHSP70	12	osa-miR167d-3p, zma-miR167e-3p, ppt-miR395, aly-miR852-3p, gma-miR4346, hvu-miR5049a, bdi-miR167c-3p, osa-miR5519, gma-miR5775, bdi-miR7767-3p, gra-miR8646, bra-miR9408-5p
BASS3 Os02g0475400 LOC_Os02g27490 P0419C03.11	12	ptc-miR171g-5p, ptc-miR171h-5p, ppt-miR1038-5p, smo-miR1084, aly-miR403a-5p, pab-miR3708, ath-miR5021, rgl-miR5142, mtr-miR5290, nta-miR6020a-5p, lja-miR7519, aly-miR403b-5p
BASS3 Os02g0475400 LOC_Os02g27490 P0419C03.11	12	ath-miR161.2, zma-miR166g-5p, bna-miR161, ath-miR2112-5p, aly-miR161-5p.2, aly-miR2112-5p, bdi-miR166d-5p, mtr-miR5248, sbi-miR5567, hci-miR156a, bra-miR161-5p, ata-miR166e-5p
BASS3 Os02g0475400 LOC_Os02g27490 P0419C03.11	12	osa-miR166c-5p, osa-miR166g-5p, zma-miR160d-3p, zma-miR166h-5p, zma-miR166l-5p, osa-miR1865-3p, aly-miR166f-5p, gma-miR166i-5p, cme-miR858, stu-miR166d-5p, aly-miR166h-5p, ata-miR166b-5p
PYL3 PYL10 RCAR3 Os02g0255500 LOC_Os02g15640 OSJNBa0052K15.19 P0613F08.1	12	osa-miR169p, ath-miR834, ath-miR863-3p, smo-miR1114, peu-miR2916, aly-miR834-3p, mtr-miR5205b, sbi-miR5564b, gma-miR169t, hvu-miR6199, bdi-miR5167b-3p, bra-miR161-3p
CAB3C	12	bna-miR156a, rco-miR156a, rco-miR156b, rco-miR156c, rco-miR156d, vvi-miR3635-3p, hvu-miR156a, tae-miR156, ssp-miR156, ssl-miR156, nta-miR156f, hvu-miR156b
MNS5 At1g27520 T17H3.2	12	bna-miR156a, rco-miR156a, rco-miR156b, rco-miR156c, rco-miR156d, vvi-miR3635-3p, hvu-miR156a, tae-miR156, ssp-miR156, ssl-miR156, nta-miR156f, hvu-miR156b
MNS5 At1g27520 T17H3.2	12	ath-miR2111a-3p, bna-miR2111a-3p, aly-miR2111a-3p, bra-miR2111a-3p, ath-miR5028, gma-miR2111a, gma-miR2111d, mdm-miR7123a, mdm-miR7123b, sbi-miR6217a-3p, sbi-miR6217b-3p, aly-miR2111c-3p
DCP2 TDT At5g13570 MSH12.3	12	osa-miR1849, mtr-miR2088-3p, aly-miR774b-5p, osa-miR812s, osa-miR5799, lja-miR7532a, lja-miR7532b, bdi-miR7724a-5p, bdi-miR7724b-5p, stu-miR8024a-3p, stu-miR8024b, gma-miR9740
DCP2 TDT At5g13570 MSH12.3	12	ppt-miR1220a, ppt-miR1220b, smo-miR1083, mtr-miR2653a, mtr-miR2653b, mtr-miR2653c, ath-miR5647, osa-miR5837.2, cca-miR390, mtr-miR2653d, gra-miR7486h, ata-miR160a-3p
At2g28960 T9I4.4	12	osa-miR166j-5p, zma-miR166h-5p, zma-miR1432-3p, ath-miR3933, mtr-miR5743a, mtr-miR5743b, stu-miR482b-5p, cca-miR6117, lja-miR7539, cpa-miR8141, ata-miR1432-3p, ata-miR1432-3p
RPL37C At3g16080 MSL1.12	12	osa-miR166j-5p, zma-miR166h-5p, zma-miR1432-3p, ath-miR3933, mtr-miR5743a, mtr-miR5743b, stu-miR482b-5p, cca-miR6117, lja-miR7539, cpa-miR8141, ata-miR1432-3p, ata-miR1432-3p
RPL37C At3g16080 MSL1.12	12	ath-miR156d-3p, zma-miR156b-3p, ptc-miR478f, ppt-miR903, aly-miR156d-3p, aly-miR156e-3p, aly-miR771-5p, gma-miR1520r, bdi-miR156g-3p, bdi-miR156i-3p, ata-miR156a-3p, ata-miR156e-3p
Os01g0290100 LOC_Os01g18640 P0469E05.28	12	ath-miR776, tae-miR1121, mtr-miR2656a, mtr-miR2656b, bdi-miR5170, mtr-miR5246, mtr-miR5558-5p, ptc-miR6437b, ptc-miR6437a, mtr-miR2656c, mtr-miR2656d, mtr-miR2656e
UCH3 At4g17510 dl4790c	12	ath-miR831-5p, ath-miR2933a, ath-miR2933b, aly-miR3445-5p.1, gma-miR4341, gma-miR5371-3p, mtr-miR5740, osa-miR5809, bdi-miR7774-5p, ptc-miR7832, cpa-miR8136, gra-miR8729
ABCI12 At3g21580 MIL23.15	12	ppt-miR1028c-3p, ppt-miR1073-5p, osa-miR1849, ppt-miR2079, mtr-miR5230, pti-miR5471, osa-miR5544, bra-miR5715, mtr-miR5749, cme-miR845, lja-miR7531, stu-miR7980b-3p
APG3 RF1 At3g62910 T20O10.10	12	osa-miR2118e, osa-miR2118o, osa-miR2118r, aly-miR851-5p, hvu-miR6191, ghr-miR7484a, ghr-miR7484b, stu-miR8034, gra-miR7484g, gra-miR7484k, bra-miR9552a-5p, bra-miR9552b-5p
HDT2 HD2B	12	osa-miR2099-5p, ath-miR4228-3p, ath-miR4228-3p, gma-miR1520i, hvu-miR5053, osa-miR5075, mtr-miR5559-3p, osa-miR5819, lja-miR7520, esi-miR8623c, gma-miR167k, gma-miR9760
HDT2 HD2B	12	osa-miR160e-3p, zma-miR164b-3p, zma-miR160f-3p, ath-miR864-3p, esi-miR3453-5p, gma-miR5374-3p, bdi-miR7741-3p.1, stu-miR8032a-3p, stu-miR8032b-3p, stu-miR8032e-3p, stu-miR8032f-3p, stu-miR8032g-3p
NRPB9A NRPE9A At3g16980 K14A17	12	bna-miR171g, ppt-miR1026a, ppt-miR1026b, ath-miR5020a, mtr-miR482-3p, ssl-miR395, cca-miR171, ptc-miR482b-3p, sbi-miR6230-5p, stu-miR8029, gra-miR3476, ata-miR5084-3p
ATL44 RHA3A At2g17450 F5J6.22 MJB20	12	osa-miR529a, osa-miR817, ppt-miR902j-3p, ptc-miR1445, ppt-miR2078, mtr-miR1510a-5p, sbi-miR529, lja-miR7525, bdi-miR7742-5p, rgl-miR7808, stu-miR5304-3p, bra-miR9569-3p
SMH6	12	pta-miR950a, pta-miR950b, ppt-miR902d-3p, gma-miR4355, gma-miR4382, gma-miR169t, nta-miR6161d, gra-miR3476, tae-miR9666c-5p, tae-miR9666b-5p, ata-miR9863a-5p, ata-miR9863b-5p
ND6 NAD6	12	ptc-miR475a-3p, ptc-miR475b-3p, ptc-miR475c, gma-miR1520b, mtr-miR2586a, nta-miR6148b, ddi-miR-7131c-3p, sbi-miR6217a-3p, sbi-miR6217b-3p, bdi-miR7772-3p, stu-miR8041a-3p, stu-miR8041b-3p
CCMC ABCI3 ABCI4 ABCI5 CCB256 CCB3 AtMg00900	12	osa-miR1428e-3p, mtr-miR2111e-3p, zma-miR395e-5p, zma-miR395h-5p, zma-miR395j-5p, zma-miR395k-5p, zma-miR395p-5p, aly-miR3441-3p.1, ath-miR4240, bdi-miR5169a, bdi-miR395o-5p, bdi-miR5169b
LOS1 At1g56070/At1g56075 T6H22.13	12	osa-miR167c-3p, ptc-miR166p, aly-miR3433-3p, ddi-miR-7131b, ddi-miR-7131b, ptc-miR6459b, stu-miR5303g, stu-miR5303h, stu-miR5303i, ath-miR8175, gra-miR8635, ata-miR167e-3p
MRS2-I OsI_13458	12	ppt-miR1223b, ppt-miR1223c, ppt-miR1223d, ppt-miR1223h, ppt-miR1223i, ppt-miR1223j, bra-miR5715, gra-miR8743c, gra-miR8743d, gra-miR8743e, gra-miR8743a, gra-miR7484g
GT2 Os02g0529600 LOC_Os02g32750 OsJ_06989 P0476H10.24	12	ppt-miR1046-3p, smo-miR1112-3p, ath-miR773b-5p, vvi-miR3624-3p, osa-miR3981-3p, mtr-miR2643b-5p, mtr-miR5225b, mtr-miR5225c, gma-miR5785, nta-miR6025c, nta-miR6025d, sly-miR9476-5p
RPL7B At2g01250 F10A8.13	12	zma-miR395e-5p, zma-miR395h-5p, zma-miR395j-5p, zma-miR395p-5p, gma-miR5031, gma-miR5031, osa-miR5073, mdm-miR7122a, mdm-miR7122b, bdi-miR7765-3p, ata-miR395a-5p, ata-miR395f-5p
CSTLP1 Os06g0523400 LOC_Os06g33210 OsJ_21524 OSJNBa0009J19.27	12	ath-miR406, ath-miR837-5p, ppt-miR893, aly-miR3449-3p, pab-miR3705, osa-miR3981-5p, gma-miR167h, gma-miR167i, ath-miR5643a, ath-miR5643a, ath-miR5997, bna-miR162a
MED37C HSC70-4 HSP70 HSP70-4 MED37_2 At3g12580 T16H11.7 T2E22.11	12	cre-miR908.2, ppt-miR2083-3p, mtr-miR2664a, pab-miR950-3p, gma-miR1520h, bna-miR6028, mdm-miR477b, lja-miR7524, mtr-miR2664b, rgl-miR7797b, stu-miR7979, gra-miR8709c
APCB1 At1g49050 F27J15.15	12	ppt-miR414, smo-miR319, osa-miR2097-3p, osa-miR2868, aly-miR4232, aly-miR4239, bdi-miR5202, bdi-miR7752-5p, stu-miR1886g-3p, esi-miR8618a, esi-miR8618a, gma-miR9731
Os04g0452000 Os04g0451900 LOC_Os04g37904 OsJ_014406 OSJNBa0086B14.22/OSJNBa0086B14.21	12	ppt-miR1218, aly-miR837-3p, osa-miR5082, osa-miR5152-3p, osa-miR5496, osa-miR5836, hme-miR-6308-3p, gra-miR8768, tae-miR9666a-3p, tae-miR9666b-3p, ata-miR5062a-5p, ata-miR5062b-3p
TIC214 ycf1-A CsCp100; TIC214 ycf1-B CsCp113	12	zma-miR395f-5p, zma-miR399j-5p, aly-miR172a-5p, mtr-miR5204, osa-miR5788, lja-miR7546, bdi-miR7725b-5p.2, ath-miR8166, gra-miR8729, gra-miR8730, ata-miR5062b-5p, ata-miR9776-5p
ELCL ELCHL VPS23B At5g13860 MAC12.18	12	ppt-miR1028a-5p, ppt-miR1028b-5p, smo-miR1092, osa-miR1865-5p, mtr-miR2633, pab-miR3703, osa-miR5522, gra-miR7486d, gra-miR399, tae-miR9772, ata-miR9772a-5p, ata-miR9772b-5p
RGLG2 At5g14420 F18O22.210	12	ath-miR173-5p, pta-miR156b, ppt-miR1033a, ppt-miR1033b, ppt-miR1033c, ppt-miR1033d, ppt-miR1033e, aly-miR173a-5p, hme-miR-285, ptc-miR6439a, aly-miR173b-5p, gra-miR8771d
ACS12 At5g51690 K10D11.3 MIO24.18	12	cre-miR1166.2, osa-miR2106, zma-miR159e-3p, vvi-miR3624-5p, mtr-miR5241a, mtr-miR5241b, mtr-miR5241c, pde-miR159, ghr-miR7497, bdi-miR7785-3p, gra-miR7504n, hbr-miR9386
DI19-3 At3g05700 F18C1.3	12	ath-miR169a-3p, ptc-miR169b-3p, zma-miR169r-3p, aly-miR169a-3p, aly-miR3443-5p, bdi-miR5060, bdi-miR169c-3p, sbi-miR5564a, bdi-miR7779-3p, stu-miR8050-5p, gra-miR8669, ata-miR169d-3p
DI19-3 At3g05700 F18C1.3	12	mtr-miR2666, zma-miR398a-3p, zma-miR398b-3p, sbi-miR398, tae-miR398, mtr-miR5560-3p, mdm-miR7120a, mdm-miR7120b, ata-miR160a-3p, ata-miR160a-3p, ata-miR398f-3p, ata-miR398g-3p
	12	ath-miR399c-5p, zma-miR162-5p, ath-miR830-5p, ath-miR840-3p, smo-miR1084, aly-miR399c-5p, gma-miR4374b, bdi-miR5202, sbi-miR6217a-3p, sbi-miR6217b-3p, ghr-miR7501, cpa-miR8143
	12	ath-miR407, ptc-miR164f, mtr-miR164d, vvi-miR164b, rco-miR164d, pab-miR3698, bgy-miR156, tcc-miR164c, nta-miR164c, mes-miR164d, stu-miR164-5p, gra-miR8653b
	12	ath-miR776, cre-miR1148.2, aly-miR163-3p.2, gma-miR5037c, ath-miR5650, hvu-miR6198, pde-miR3704b, stu-miR8002-5p, gra-miR8710a, gra-miR8710b, gra-miR8771c, gma-miR9750
CIGR1 Os07g0545800 LOC_Os07g36170 OsJ_24639 P0006G05.102	12	ath-miR158a-3p, ath-miR158b, ppt-miR1048-5p, osa-miR2907a, osa-miR2907b, osa-miR2907c, osa-miR2907d, aly-miR158a-3p, sly-miR5303, osa-miR5526, sbi-miR6218-3p, stu-miR8049-5p
ACER CES1 YPC1 At4g22330 T10I14.160	12	ath-miR164c-3p, ptc-miR171g-5p, ptc-miR171h-5p, ppt-miR1038-5p, bdi-miR7744-3p, stu-miR8041a-3p, stu-miR8041b-3p, gra-miR8718, bdi-miR9498, bra-miR164b-3p, bra-miR164d-3p, bra-miR164c-3p
ACER CES1 YPC1 At4g22330 T10I14.160	12	osa-miR166k-3p, osa-miR166l-3p, sbi-miR166e, zma-miR166k-3p, zma-miR166j-3p, sbi-miR166g, zma-miR166n-3p, ssl-miR395, ptc-miR6439b, bdi-miR166h-3p, rgl-miR7798, ata-miR5168-3p
At1g28640 F1K23.25	12	cre-miR1150.1, osa-miR810b.2, esi-miR3458-3p, aly-miR4241, aly-miR4250, mtr-miR5218, osa-miR5485, osa-miR5492, hme-miR-7, ghr-miR7502, rgl-miR7800, bdi-miR9496
At1g28640 F1K23.25	12	ptc-miR399c, mtr-miR171b, vvi-miR171b, vvi-miR399d, rco-miR399f, mtr-miR5245, ptc-miR6428, cme-miR171h, lja-miR171b, bdi-miR7713-3p, ptc-miR7817a, sly-miR9469-5p
SAUR32 AAM1 At2g46690	12	osa-miR159e, smo-miR1103-5p, gma-miR1515a, osa-miR1865-5p, zma-miR395o-3p, gma-miR1515b, cme-miR159b, ghr-miR7500, rgl-miR7797b, stu-miR8044-3p, gra-miR8663a, tae-miR1130b-3p
MYOB3 At5g16720 F5E19.60	12	cre-miR908.2, ppt-miR1076-5p, ppt-miR1077-3p, gma-miR1531-3p, aly-miR869-3p, bdi-miR5176-5p, bdi-miR5179, osa-miR5179, nta-miR6160, hme-miR-6301-3p, han-miR3630-3p, tae-miR9777
URGT6 At1g34020 F12G12.16 T15K4.8	12	zma-miR2275b-5p, vvi-miR477b-5p, nta-miR6025a, nta-miR6025b, stu-miR6025, nta-miR6025c, nta-miR5303a, nta-miR5303b, bdi-miR167e-3p, bdi-miR7716-5p, gra-miR8766, ata-miR167b-3p
PVIP	12	osa-miR156c-3p, osa-miR156g-3p, zma-miR156a-3p, cre-miR1154-3p, osa-miR2100-3p, hvu-miR397a, bdi-miR156b-3p, mtr-miR5239, ddi-miR-7102, bdi-miR156e-3p, gra-miR530a, ata-miR156d-3p
CYP709B2 At2g46950	12	ppt-miR1033a, ppt-miR1033b, ppt-miR1033c, ppt-miR1033d, ppt-miR1033e, aly-miR825-3p, aly-miR853-5p, ath-miR5666, hvu-miR6212, ptc-miR6451, gra-miR8658, gra-miR8766
CYP38 At3g01480 F4P13.3	12	osa-miR426, ptc-miR169s, gma-miR1512a-3p, vvi-miR169l, gma-miR1509b, osa-miR2926, aly-miR4226, vvi-miR3623-3p, gma-miR169u, ptc-miR6469, gra-miR8750, gma-miR9764
CYP38 At3g01480 F4P13.3	12	osa-miR426, ptc-miR169s, gma-miR1512a-3p, vvi-miR169l, gma-miR1509b, osa-miR2926, aly-miR4226, vvi-miR3623-3p, gma-miR169u, ptc-miR6469, gra-miR8750, gma-miR9764
At5g01750 T20L15.20	12	ptc-miR477a-5p, ptc-miR477b, cre-miR908.3, smo-miR536, mtr-miR2598, csi-miR172a-5p, aly-miR399d-5p, bna-miR6029, ptc-miR6455, sbi-miR5568d-3p, bdi-miR7731-5p, stu-miR172c-5p
At5g01750 T20L15.20	12	cre-miR909.3, pta-miR398, ppt-miR1067, aqu-miR-2014-5p, osa-miR2105, aly-miR395d-5p, bdi-miR5169a, bdi-miR5170, osa-miR5495, bdi-miR7741-3p.2, bdi-miR7772-3p, bdi-miR5169b
WAXY GBSS	12	cre-miR909.3, pta-miR398, ppt-miR1067, aqu-miR-2014-5p, osa-miR2105, aly-miR395d-5p, bdi-miR5169a, bdi-miR5170, osa-miR5495, bdi-miR7741-3p.2, bdi-miR7772-3p, bdi-miR5169b
OEP80 At5g19620 T29J13.40	12	osa-miR535-3p, ppt-miR160c, ppt-miR160d, ppt-miR160g, ppt-miR160h, esi-miR3450-5p, osa-miR5157a-5p, osa-miR5157b-5p, mtr-miR2619b-5p, dpr-miR160, ptc-miR6435, bdi-miR7711-3p.3
OEP80 At5g19620 T29J13.40	12	osa-miR166b-5p, zma-miR166a-5p, ppt-miR1037, osa-miR2927, aly-miR827-5p, bdi-miR166b-5p, sly-miR6024, nta-miR6024, lja-miR7542, tae-miR9653a-3p, tae-miR9667-5p, ata-miR166d-5p
SKIP11 At2g02870 T17M13.4	12	ath-miR870-5p, mtr-miR156d-3p, smo-miR1112-3p, ath-miR2939, aly-miR4221, aly-miR4248a, aly-miR4248b, aly-miR4248c, ptc-miR6461, sbi-miR6230-3p, bdi-miR7757-3p.1, stu-miR7992-3p
SKIP11 At2g02870 T17M13.4	12	ath-miR853, cre-miR914, ppt-miR902j-5p, cre-miR1173, bdi-miR5065, ath-miR5629, mtr-miR5747, hvu-miR6209, mtr-miR7699-3p, bdi-miR7714-5p, gra-miR8695, gra-miR8735
PAT14 At3g60800 T4C21_210	12	zma-miR319b-5p, zma-miR319d-5p, ptc-miR160e-3p, osa-miR2102-5p, mtr-miR2654, osa-miR2869, vvi-miR3637-5p, mtr-miR5214-5p, mtr-miR160f, bdi-miR7734-5p, gra-miR7492n, tae-miR396-5p
ACBP1 Os08g0162800 LOC_Os08g06550 OJ9990_A01.106 OsJ_26146 P0577B11.140	12	ptc-miR478a, ptc-miR478b, ptc-miR478c, ppt-miR1078, pab-miR3695, gma-miR159d, hvu-miR5051, bdi-miR7724a-3p, bdi-miR7724b-3p, bdi-miR7726b-5p, bdi-miR7768a-3p, bdi-miR7768b-3p
ACBP1 Os08g0162800 LOC_Os08g06550 OJ9990_A01.106 OsJ_26146 P0577B11.140	12	zma-miR395c-5p, ppt-miR1069-3p, zma-miR395d-5p, zma-miR395g-5p, aly-miR838-5p, bdi-miR395g-5p, bdi-miR395h-5p, bdi-miR395l-5p, bdi-miR395n-5p, osa-miR812v, bdi-miR395p-5p, ata-miR395b-5p
EXL3 At1g75900 T4O12.13	12	ptc-miR167f-3p, ptc-miR167g-3p, ptc-miR167h-3p, ath-miR2111b-3p, ahy-miR167-3p, vvi-miR3639-5p, osa-miR5802, mtr-miR7696a-3p, mtr-miR7696b-3p, stu-miR397-3p, cpa-miR477, gra-miR8730
UNE10 BHLH16 EN108 At4g00050 F6N15.11	12	ppt-miR1044-3p, vvi-miR172d, osa-miR1429-3p, sbi-miR396d, csi-miR857, aau-miR172, ath-miR5665, osa-miR1319b, cca-miR6118-5p, nta-miR6025d, stu-miR7983-5p, gma-miR9753
UNE10 BHLH16 EN108 At4g00050 F6N15.11	12	cre-miR908.3, cre-miR1156.1, ppt-miR2082, zma-miR395f-5p, aly-miR4225, ptc-miR7826, stu-miR7993a, stu-miR7993b-3p, stu-miR7993c, stu-miR7993d, cpa-miR8137, sly-miR9474-5p
UNE10 BHLH16 EN108 At4g00050 F6N15.11	12	osa-miR414, osa-miR414, ppt-miR414, ppt-miR414, smo-miR1088-5p, ptc-miR1446a, ptc-miR1446b, ptc-miR1446c, ptc-miR1446d, ptc-miR1446e, gma-miR5044, mes-miR1446
UNE10 BHLH16 EN108 At4g00050 F6N15.11	12	osa-miR414, osa-miR414, ppt-miR414, ppt-miR414, smo-miR1088-5p, ptc-miR1446a, ptc-miR1446b, ptc-miR1446c, ptc-miR1446d, ptc-miR1446e, gma-miR5044, mes-miR1446
GL2 ATHB10 At1g79840 F19K16.20	12	cre-miR1147.1, osa-miR1432-3p, ctr-miR171, gma-miR171m, gma-miR171t, hvu-miR6183, hvu-miR6184, hvu-miR6188, mdm-miR171a, mdm-miR171b, stu-miR171b-3p, sly-miR171e
At3g14410 MLN21.19	12	cre-miR905-3p, ppt-miR1033a, ppt-miR1033b, ppt-miR1033c, ppt-miR1033d, ppt-miR1033e, aly-miR856-5p, aly-miR4227, osa-miR5811, ddi-miR-7100, rgl-miR7807a-5p, gma-miR9732
ORP1D At1g13170 F3F19.19	12	mtr-miR2629a, mtr-miR2629d, mtr-miR2629e, mtr-miR2629b, mtr-miR2629c, mtr-miR2629f, mtr-miR2629g, osa-miR2919, esi-miR3454f-3p, esi-miR3454b-3p, osa-miR5529, gra-miR167c
At4g15545 dl3810w FCAALL.328	12	ath-miR780.2, ppt-miR1025, gma-miR4382, gma-miR862a, gma-miR5041-5p, gma-miR5777, hvu-miR6206, bdi-miR7740-3p, gra-miR7502f, bra-miR9568-5p, ata-miR5062a-3p, ata-miR5062b-5p
BZIP11 ATB2 GBF6 At4g34590 T4L20.170	12	ptc-miR159c, ath-miR829-3p.2, smo-miR1106, ppt-miR2079, aly-miR829-3p, osa-miR5162, ssp-miR437b, osa-miR5490, ssl-miR948, cpa-miR8138, cpa-miR8151, gma-miR9744
BZIP11 ATB2 GBF6 At4g34590 T4L20.170	12	osa-miR1428a-3p, gma-miR1510a-5p, mtr-miR2655b, aly-miR167c-3p, gma-miR4403, csi-miR482a-5p, osa-miR3981-3p, gma-miR5371-5p, hme-miR-305, bdi-miR7747-3p, gra-miR8687, tae-miR1120c-5p
	12	cre-miR906-5p, ppt-miR1076-5p, sly-miR397, bra-miR5726, ptc-miR6460, mdm-miR397a, mdm-miR397b, sbi-miR5568c-3p, mes-miR397, mtr-miR7698-3p, stu-miR397-5p, gra-miR3476
CYP72A67 MTR_2g023680	12	gma-miR159a-5p, ath-miR2111b-3p, bna-miR2111b-3p, mtr-miR2111m-3p, aly-miR2111b-3p, bra-miR2111b-3p, osa-miR5151, gma-miR159e-5p, hvu-miR6213, bdi-miR7763-5p, bdi-miR7763-5p, gra-miR8647
CYP72A154	12	zma-miR171f-3p, smo-miR171b, gma-miR171c-3p, pti-miR5477, gma-miR171o-3p, gma-miR171q, ath-miR5996, nta-miR6162, mdm-miR171m, mdm-miR171n, sbi-miR6230-3p, gra-miR8781b
GAUT7 JS33 LGT7 At2g38650 T6A23.15	12	ptc-miR478p, aqc-miR530, tcc-miR530a, ath-miR5014a-5p, bdi-miR5199, mtr-miR5271a, mtr-miR5271b, mtr-miR5271c, mtr-miR5271d, mtr-miR5271e, osa-miR5515, osa-miR5515
ATL59 At4g10160 F28M11.80 T9A4.20	12	sbi-miR169d-3p, gma-miR1519, osa-miR2864.2, aly-miR3444a-3p, bdi-miR169h-3p, ssp-miR437c, cme-miR164b, ghr-miR7488, lja-miR7522, ptc-miR7830, bra-miR9567-3p, ata-miR169c-3p
SCY1 SECY At2g18710 MSF3.9	12	tae-miR1137a, mtr-miR2667a, aly-miR403a-5p, gma-miR5678, mtr-miR2667b, bdi-miR7724a-3p, bdi-miR7724b-3p, bdi-miR7728-5p, bdi-miR7770-3p, stu-miR7992-3p, aly-miR403b-5p, gma-miR9752
mat1	12	ath-miR864-3p, smo-miR1106, cre-miR1147.2, mtr-miR2627, aly-miR400-3p, tcc-miR169n, gma-miR2111a, gma-miR2111d, bna-miR6036, gra-miR8784, tae-miR1127b-3p, gma-miR9744
XCT Os09g0535300 LOC_Os09g36480 J023088M16 OsJ_30139 P0569E11.5	12	ppt-miR1055, sly-miR397, mtr-miR2622, zma-miR397a-5p, zma-miR397b-5p, vvi-miR3633b-3p, hvu-miR397a, mdm-miR397a, mdm-miR397b, mes-miR397, bdi-miR397b-5p, stu-miR397-5p
ND2 NAD2	12	ath-miR160c-3p, osa-miR167c-3p, ath-miR394b-3p, zma-miR167d-3p, zma-miR167c-3p, gma-miR4374a, lja-miR7519, lja-miR7523a, lja-miR7523b, mtr-miR319c-5p, bdi-miR7748a-5p, ata-miR167e-3p
KNAT3 At5g25220 F21J6.18	12	ppt-miR1211-3p, aqu-miR-2018-5p, far-miR1119, gra-miR8639a, gra-miR8639b, gra-miR8639c, gra-miR8639f, gra-miR8639g, gra-miR8639h, gra-miR8639i, gra-miR8639d, gra-miR8639e
KNAT4 At5g11060 T5K6_50	12	osa-miR2907a, osa-miR2907b, osa-miR2907c, osa-miR2907d, aly-miR162a-5p, aly-miR162b-5p, aly-miR163-5p.2, gma-miR4412-3p, gma-miR4998, stu-miR162a-5p, stu-miR162b-5p, bra-miR162-5p
COX2 COXII	12	osa-miR408-5p, smo-miR1104, zma-miR2118f, aly-miR169n-3p, gma-miR4392, csi-miR477c, mtr-miR5233, mtr-miR5244, hvu-miR6182, rgl-miR7806, sly-miR9477-3p, bra-miR9553-5p
NAC091 TIP At5g24590 K18P6.12	12	osa-miR169d, ppt-miR536f, vvi-miR169v, osa-miR1860-3p, ghr-miR2949a-3p, aly-miR868-5p, gma-miR4395, osa-miR5510, mtr-miR396c, cme-miR169g, stu-miR396-3p, bdi-miR169l
NAC045 At3g03200 T17B22.11	12	osa-miR169i-5p.2, tae-miR1122a, bdi-miR1122, esi-miR3452-3p, gma-miR4412-5p, far-miR1122, osa-miR5144-3p, mtr-miR5554a-5p, mtr-miR5554b-5p, mtr-miR5554c-5p, sbi-miR5565e, nta-miR6160
NAC091 TIP At5g24590 K18P6.12	12	ppt-miR899, pta-miR1315, osa-miR2121a, osa-miR2121b, tae-miR169, osa-miR2863c, gma-miR4416b, hme-miR-316, ptc-miR6446, gra-miR7484f, gma-miR9728, ata-miR160b-3p
NAC045 At3g03200 T17B22.11	12	ptc-miR476b, osa-miR810a, cre-miR906-5p, bna-miR167a, bna-miR167b, osa-miR2118a, gma-miR4371a, bdi-miR5167a-3p, bdi-miR5172-3p, cca-miR6104, gra-miR8729, tae-miR530
FPP7 At2g23360 F26B6.1	12	ppt-miR534a, aly-miR395b-5p, aly-miR395c-5p, mtr-miR5261, osa-miR5833, hvu-miR6187, lja-miR7516-5p, bdi-miR7768a-5p, bdi-miR7768b-5p, cpa-miR477, hvu-miR397b-3p, tae-miR9780
FPP7 At2g23360 F26B6.1	12	osa-miR2275a, osa-miR2275b, zma-miR2275a-3p, zma-miR2275d-3p, zma-miR395o-3p, aly-miR3441-3p.2, bdi-miR2275a, bdi-miR2275c, tae-miR2275-3p, ata-miR2275a-3p, ata-miR2275b-3p, ata-miR2275c-3p
FPP7 At2g23360 F26B6.1	12	zma-miR156a-3p, osa-miR820a, osa-miR820b, osa-miR820c, ath-miR847, ath-miR773b-5p, ath-miR841b-3p, vvi-miR2950-5p, osa-miR5529, mes-miR2950, gra-miR8773, ata-miR156d-3p
EDS1B EDS1-80 EDS1L At3g48080 T17F15.50	12	ptc-miR167h-5p, smo-miR1105, mtr-miR2658, osa-miR2863a, aly-miR840-5p, gma-miR4359b, sbi-miR5568f-5p, cpa-miR8148, gra-miR8703a, gra-miR8703b, gra-miR8703c, gma-miR167k
MED8 MED8_1 SETH10 At2g03070 T17M13.24	12	tae-miR1129, zma-miR169m-5p, zma-miR169n-5p, zma-miR169q-5p, sbi-miR169p, sbi-miR169q, aly-miR4221, bdi-miR169j-5p, hvu-miR6194, pde-miR3704a, pde-miR3704b, bdi-miR7709-3p
GLCAT14B At5g15050 F2G14.170	12	zma-miR164c-3p, zma-miR164h-3p, ath-miR4228-5p, bdi-miR164a-3p, osa-miR5525, osa-miR5541, mtr-miR5557-5p, ath-miR5637, cca-miR6114-3p, bdi-miR7780-3p, stu-miR8040-5p, ata-miR399b-5p
POT8 HAK8 KUP8 At5g14880 T9L3_180	12	pta-miR1314, osa-miR2095-3p, gma-miR2108b, zma-miR159f-5p, hme-miR-2788-5p, sly-miR5302a, osa-miR5514, nta-miR6025a, stu-miR6025, nta-miR6161a, nta-miR6161b, ptc-miR7823
21D7	12	ptc-miR476b, pta-miR1314, zma-miR159f-5p, hme-miR-2788-5p, bdi-miR5172-3p, sly-miR5302a, nta-miR6025a, stu-miR6025, hvu-miR6183, cme-miR399f, gra-miR8706a, gra-miR8706b
GPDH	12	osa-miR1866-5p, aly-miR862-5p, osa-miR5081, osa-miR5144-5p, bdi-miR5163a-3p, ath-miR5637, ath-miR5640, gma-miR5668, ptc-miR6460, ghr-miR160, bdi-miR7776-3p.1, gra-miR8682
WDL2 At1g54460 F20D21.28	12	ath-miR832-3p, aly-miR862-5p, ath-miR5029, mtr-miR5290, osa-miR5486, gma-miR5668, ptc-miR7825, stu-miR7983-5p, stu-miR7993a, stu-miR7993b-3p, stu-miR7993c, stu-miR7993d
DGK5 At2g20900 F5H14.13	12	zma-miR399g-3p, zma-miR399g-3p, sbi-miR399k, sbi-miR399k, osa-miR5340, mtr-miR2592bl-5p, gma-miR5767, hbr-miR6169, hbr-miR159b, gra-miR8671, gra-miR7494e, gra-miR7494f
FATB1	12	ath-miR403-5p, mtr-miR1507-5p, bdi-miR5170, ath-miR5635a, ath-miR5635d, ath-miR5635b, ath-miR5635c, gra-miR8671, gra-miR8776a, gra-miR8776b, gra-miR8776c, gra-miR8776d
ABC1K7 SIA1 At3g07700 F17A17.4 MLP3.15	12	ppt-miR1069-3p, ptc-miR1448, mtr-miR1507-3p, csi-miR857, mtr-miR5257, nta-miR6021, sly-miR6027-3p, stu-miR6027, nta-miR6025e, bdi-miR5185l-5p, stu-miR7994b-5p, tae-miR7757-5p
	11	ath-miR169f-3p, aqu-miR-2016-5p, zma-miR528a-3p, zma-miR528b-3p, aly-miR169d-3p, aly-miR169e-3p, aly-miR169f-3p, aly-miR169g-3p, bdi-miR528-3p, bdi-miR5200c, ata-miR528-3p
	11	gma-miR1510b-3p, mtr-miR2617a, mtr-miR2617c, mtr-miR2617b, gso-miR1510b, gso-miR1510a, osa-miR5489, ath-miR5662, nta-miR6157, ptc-miR6422, rgl-miR7802
XAT3 Os03g0567600 LOC_Os03g37010 OsJ_11476 OSJNBa0026A15.4	11	cre-miR1154-5p, ptc-miR530b, osa-miR1882e-3p, mtr-miR2624, aqc-miR530, aly-miR844-3p, pab-miR482d, csi-miR530b, osa-miR5811, ptc-miR6447, bdi-miR9487
XAT3 Os03g0567600 LOC_Os03g37010 OsJ_11476 OSJNBa0026A15.4	11	ppt-miR533a-3p, ppt-miR533b-3p, ppt-miR533c, ppt-miR533d, ppt-miR533e, pvu-miR1514a, vvi-miR3635-3p, osa-miR5492, bdi-miR7745-5p, stu-miR8038a-5p, stu-miR8038b-5p
XAT3 Os03g0567600 LOC_Os03g37010 OsJ_11476 OSJNBa0026A15.4	11	ath-miR156a-3p, zma-miR156e-3p, zma-miR156h-3p, zma-miR156i-3p, tae-miR1128, bdi-miR1127, aly-miR156a-3p, ssp-miR1128, bra-miR156f-3p, ata-miR395a-5p, ata-miR395f-5p
RPS1 SOVF_099990	11	ath-miR851-3p, osa-miR2928, mtr-miR5272a, mtr-miR5272b, mtr-miR5272c, mtr-miR5272d, mtr-miR5272e, bna-miR2111c, hme-miR-34, osa-miR7692-5p, bra-miR2111-5p
NAC087 At5g18270 MRG7.23	11	osa-miR528-5p, zma-miR528a-5p, zma-miR528b-5p, sbi-miR528, ahy-miR3509-5p, gma-miR4367, bdi-miR528-5p, ssp-miR528, hvu-miR6184, lja-miR7543, ata-miR528-5p
HRD1B At1g65040 F16G16.4	11	ppt-miR1063a, ppt-miR1063b, ppt-miR1063c, ppt-miR1063d, ppt-miR1063e, ppt-miR1063f, ppt-miR1063g, ppt-miR1063h, osa-miR1854-5p, mtr-miR2592bq-5p, esi-miR8625
RPL12A At2g37190 T2N18.5	11	cre-miR908.2, osa-miR1875, vvi-miR3630-5p, hbr-miR6171, sbi-miR6235-5p, bdi-miR7708b-5p, ptc-miR7831, stu-miR8035, gra-miR7502b, gra-miR7502c, sly-miR9476-5p
RPL12A At2g37190 T2N18.5	11	osa-miR168a-5p, sbi-miR168, sof-miR168a, zma-miR168a-5p, zma-miR168b-5p, hvu-miR168-5p, bdi-miR168-5p, ssp-miR168a, bna-miR168b, bdi-miR7711-5p.2, ata-miR168-5p
At4g09580 T25P22.20	11	mtr-miR2659a, mtr-miR2659b, mtr-miR2659c, mtr-miR2659d, mtr-miR2659e, mtr-miR2659f, mtr-miR2659g, mtr-miR2659h, mtr-miR2659i, mtr-miR2659j, mtr-miR2659k
At1g09760 F21M12.14	11	gma-miR171b-3p, aly-miR157b-3p, ahy-miR156b-3p, csi-miR171b, mtr-miR171h, mtr-miR171g, gma-miR171r, gma-miR171r, gma-miR171s, gma-miR171s, bdi-miR7711-5p.3
FBX5 At2g44900 T13E15.9	11	osa-miR5539a, osa-miR5542, gma-miR5671a, ptc-miR7828, osa-miR5539b, ath-miR8167a, ath-miR8167b, ath-miR8167c, ath-miR8167d, ath-miR8167e, ath-miR8167f
At3g07290 T1B9.4	11	ath-miR172b-5p, ath-miR172e-5p, ppt-miR1028a-5p, gma-miR1520a, zma-miR397b-3p, aly-miR172e-5p, osa-miR5511, ath-miR5654-5p, ptc-miR6474, esi-miR8623c, bra-miR9559-5p
At3g51130 F24M12.170	11	gma-miR1528, osa-miR1849, pta-miR1311, mtr-miR2603, pab-miR1311, bdi-miR5174a, pde-miR1311, mtr-miR397-3p, bdi-miR5174e-5p.1, bdi-miR5163b-5p, bdi-miR5174b-5p
TPP2 Os02g0664300 LOC_Os02g44520 P0461B08.4-1 P0461B08.4-2	11	zma-miR167a-3p, ptc-miR169ac, ptc-miR169ad, ptc-miR169ae, ptc-miR169af, osa-miR1432-5p, sbi-miR1432, zma-miR1432-5p, lja-miR7538, bdi-miR1432, ata-miR1432-5p
CCB3 At5g36120 MAB16.6	11	ppt-miR1059, ppt-miR1078, mtr-miR2672, esi-miR3463-3p, vvi-miR3631a-3p, pab-miR397, hvu-miR397a, bdi-miR5067, mtr-miR5559-3p, sbi-miR5568c-5p, gra-miR7486i
CCB3 At5g36120 MAB16.6	11	gma-miR1533, bdi-miR5064, gma-miR5371-5p, ath-miR5645a, ath-miR5645b, ath-miR5645d, ath-miR5645f, ath-miR5645e, stu-miR8035, ata-miR9674c-5p, ata-miR9674b-3p
PNSL1 PPL2 At2g39470 F12L6.13	11	ptc-miR159c, gma-miR159b-3p, gma-miR159c, pab-miR3709b, mtr-miR159b, gma-miR159f-3p, ath-miR5644, ath-miR5663-5p, mes-miR159c, mes-miR159d, gma-miR5780d
ARAD1 At2g35100 T4C15	11	ppt-miR529e, ppt-miR529f, gma-miR1512a-3p, mtr-miR2610a, mtr-miR2610b, mtr-miR2677, aly-miR319a-5p, esi-miR3467-5p, ddi-miR-7131a-3p, ddi-miR-7131d, bra-miR319-5p
WOX8 Os01g0818400 LOC_Os01g60270 OsJ_03880 P0454H12.31	11	ath-miR395b, ath-miR395c, ath-miR395f, aly-miR395b-3p, aly-miR395f-3p, aly-miR395h-3p, bna-miR395d, bna-miR395e, bna-miR395f, cca-miR395a, gra-miR8655
RBL9 At5g38510 MBB18.4	11	ppt-miR1073-5p, pta-miR1309, mtr-miR2667a, aly-miR4222, mtr-miR5245, osa-miR5500, osa-miR5796, ath-miR5997, ptc-miR6452, mtr-miR2667b, ath-miR8179
RBL9 At5g38510 MBB18.4	11	gma-miR172b-5p, csi-miR172a-5p, aly-miR172a-5p, mtr-miR172c-5p, nta-miR6147, stu-miR172c-5p, gra-miR172a, gra-miR172b, gra-miR8674c, bra-miR172d-5p, ata-miR172c-5p
VPS60-1 VPS60A At3g10640 F13M14.7 F18K10.26	11	ath-miR172d-5p, mtr-miR2615a, mtr-miR2615b, mtr-miR2615c, mtr-miR2679a, mtr-miR2679b, mtr-miR2679c, aly-miR172d-5p, esi-miR3455-5p, osa-miR5824, pde-miR950
GINS2 At3g12530 MQC3.35 T2E22.16	11	ath-miR402, ath-miR407, osa-miR169p, gma-miR160a-3p, cre-miR908.1, cre-miR1160.1, ath-miR2112-5p, aly-miR2112-5p, mtr-miR5757, sbi-miR6230-5p, stu-miR160a-3p
CPC At2g46410 F11C10.10	11	osa-miR1882a, osa-miR1882b, osa-miR1882c, osa-miR1882d, osa-miR1882e-5p, osa-miR1882f, osa-miR1882g, osa-miR1882h, bra-miR9568-5p, gma-miR9735, tae-miR531
RGLG4 At1g79380 T8K14.20	11	osa-miR1882a, osa-miR1882b, osa-miR1882c, osa-miR1882d, osa-miR1882e-5p, osa-miR1882f, osa-miR1882g, osa-miR1882h, bra-miR9568-5p, gma-miR9735, tae-miR531
RPL10	11	zma-miR396b-3p, zma-miR396a-3p, smo-miR1108, aly-miR774b-5p, esi-miR3466-5p, tcc-miR535, bdi-miR396d-3p, bdi-miR396c-3p, bdi-miR7722-5p, gra-miR8632, ata-miR396e-3p
CIPK12 PKS8 SnRK3.9 At4g18700 F28A21.110	11	ptc-miR395a, aqc-miR395b, aqc-miR395a, osa-miR3982-5p, osa-miR5494, mtr-miR5743a, mtr-miR5743b, osa-miR5834, ath-miR5999, mes-miR395e, bra-miR9558-3p
MRS2-F Os01g0908500 LOC_Os01g68040 B1417F08.35 OsJ_04478 P0456E05.8 P0497A05.17	11	ppt-miR1212, osa-miR1857-3p, mtr-miR2642, pab-miR3704, pab-miR3704, osa-miR5523, pde-miR3704a, pde-miR3704a, mtr-miR7697-5p, gra-miR530a, tae-miR9666b-3p
VDE1 AVDE1 NPQ1 VXDE At1g08550 F22O13.3 T27G7.23	11	bna-miR161, pvu-miR159a.2, ghr-miR2949a-3p, aly-miR853-3p, mtr-miR2619b-3p, stu-miR6024-5p, hbr-miR159b, han-miR3630-3p, gra-miR7504n, sly-miR9470-3p, bra-miR161-5p
OsI_031067	11	aly-miR844-3p, pab-miR3704, bdi-miR5171a, gma-miR5373, rgl-miR5577, pde-miR3704a, bdi-miR7739-3p, bdi-miR7757-3p.2, gra-miR8674b, bdi-miR5171b, gma-miR5780d
ILL6 Os06g0691400 LOC_Os06g47620 OsJ_22451 P0532H03.15	11	ath-miR776, ppt-miR1034, ath-miR1886.3, ppt-miR2083-3p, mtr-miR2088-5p, aly-miR3449-3p, ath-miR5641, hvu-miR6213, bdi-miR7772-3p, gra-miR8741, gra-miR8745
PHL11 At5g45580 K2N11.5	11	ath-miR868-3p, ppt-miR1054, cre-miR1165-5p, osa-miR1436, aly-miR868-3p, vvi-miR3624-3p, gma-miR4349, hvu-miR1436, bdi-miR7722-5p, bdi-miR7768a-3p, bdi-miR7768b-3p
DELTA-ADR PAT4 At1g48760 F11I4.7	11	mtr-miR2634, aly-miR395e-5p, aly-miR395g-5p, aly-miR4222, hme-miR-252, hme-miR-3338, bdi-miR7708a-5p, bra-miR395d-5p, bra-miR395b-5p, bra-miR395c-5p, bra-miR395a-5p
LECRKS1 At1g15530 T16N11.4	11	osa-miR444d.3, pta-miR482c, mtr-miR2118, zma-miR482-3p, pab-miR482b, bdi-miR5164, ssp-miR444b.1, osa-miR5533, pde-miR482b, stu-miR167d-3p, ata-miR9776-3p
ASK3 SK12 At3g05840 F10A16.14	11	ppt-miR1029, ppt-miR1059, aly-miR399f-5p, aly-miR163-5p.1, pti-miR5481, gma-miR5678, ath-miR5999, sbi-miR6218-5p, sbi-miR6227-3p, bdi-miR7729a-5p, bdi-miR7729b-5p
BON3 At1g08860 F7G19.25	11	ptc-miR390d-3p, ppt-miR1222a, ppt-miR1222b, ppt-miR1222c, ppt-miR1222d, ppt-miR1222e, stu-miR8051-5p, stu-miR390-3p, sly-miR390a-3p, bra-miR9557-5p, gma-miR4348c
CYP89A2 CYP89 At1g64900 F13O11.20	11	osa-miR1846a-3p, osa-miR1846b-3p, osa-miR1846c-3p, ath-miR3440b-5p, ghr-miR7492a, ghr-miR7492b, ghr-miR7492c, mtr-miR7698-3p, gra-miR8648, gra-miR7492l, gra-miR7492m
HSP90-5 CR88 EMB1956 HSP88-1 At2g04030	11	pta-miR1314, osa-miR2098-5p, zma-miR395k-5p, osa-miR2922, ptc-miR6423, pde-miR1313, mtr-miR2592bq-5p, stu-miR7989, esi-miR8631, gra-miR8724, tae-miR5049-3p
GGH2 GGH GGH1 At1g78680 F9K20.28	11	osa-miR399k, sbi-miR399g, zma-miR399f-3p, ptc-miR399h, osa-miR5512a, osa-miR5512a, nta-miR6025e, nta-miR6025e, osa-miR5512b, osa-miR5512b, gra-miR8675a
Os03g0698800 LOC_Os03g49170 OSJNBb0017F17.19	11	ath-miR169a-3p, ath-miR1886.1, zma-miR169r-3p, aly-miR169a-3p, ath-miR5026, bdi-miR169c-3p, ptc-miR6444, stu-miR8001a, stu-miR8001b-5p, ata-miR169d-3p, ata-miR9783-5p
BAS1 At3g11630 F24K9.28 T19F11.3	11	gma-miR4997, mdm-miR7121a, mdm-miR7121b, mdm-miR7121c, mdm-miR7121d, mdm-miR7121e, mdm-miR7121f, mdm-miR7121g, mdm-miR7121h, gra-miR8721a, gra-miR8721b
At5g06290 MHF15.19	11	ppt-miR1039-5p, smo-miR1104, vvi-miR169y, gma-miR1535a, aly-miR169n-5p, gma-miR169h, hvu-miR6208, cme-miR169d, cme-miR169c, mtr-miR169l-3p, ata-miR5168-5p
At5g06290 MHF15.19	11	ppt-miR1061-3p, aly-miR169n-3p, aly-miR846-5p, mtr-miR5558-5p, ath-miR5999, hme-miR-6309-3p, ghr-miR7510b, mtr-miR2592bq-5p, stu-miR8047, cpa-miR8140, bra-miR9557-3p
BAS1	11	mtr-miR2666, aly-miR160b-3p, ath-miR5019, gma-miR171i-5p, ptc-miR6447, bdi-miR5174c-3p, bdi-miR7725b-5p.2, gra-miR7504d, gra-miR7504e, gra-miR7504f, gma-miR9744
CAM3 Os01g0279300 LOC_Os01g17190 OsJ_001265 OsJ_01307 P0003H10.4	11	ghr-miR156c, bdi-miR5056, rgl-miR5578, har-miR156c, mdm-miR7123a, mdm-miR7123b, tae-miR9672a-3p, tae-miR397-5p, tae-miR6197-5p, tae-miR9672b, ata-miR9672-3p
	11	ppt-miR1064-5p, gma-miR1509a, osa-miR2099-5p, aly-miR844-5p, gso-miR1509a, osa-miR5523, mdm-miR7122a, mdm-miR7122b, sbi-miR6234a-3p, sbi-miR6234b-3p, stu-miR7995
SPL11 Os12g0570000 LOC_Os12g38210	11	osa-miR166a-5p, osa-miR166e-5p, zma-miR166b-5p, zma-miR166d-5p, mtr-miR2089-5p, bdi-miR166c-5p, gma-miR166i-5p, hme-miR-13b, stu-miR166d-5p, gma-miR9762, ata-miR166a-5p
UBC5 At1g63800 F24D7.1 T12P18.18	11	mtr-miR1507-3p, esi-miR3454f-3p, esi-miR3454b-3p, pab-miR950-5p, mtr-miR5276, mtr-miR5276, osa-miR5484, hvu-miR6196, stu-miR8044-3p, gra-miR8768, bra-miR408-3p
PAL	11	bdi-miR395d-5p, bdi-miR395g-5p, mtr-miR5221, ath-miR5657, vun-miR164, osa-miR5828, rgl-miR7804-3p, cpa-miR164d, cpa-miR164e, cpa-miR477, cpa-miR8151
PAL1	11	aly-miR4243, gma-miR4372b, osa-miR5788, hme-miR-1b, hme-miR-1b, mdm-miR7121d, mdm-miR7121e, mdm-miR7121f, mdm-miR7121g, mdm-miR7121h, sly-miR5302b-5p
PAL1	11	osa-miR169f.2, osa-miR169f.2, aly-miR157b-3p, aly-miR3435-3p, gma-miR319d, gma-miR319i, ptc-miR6452, ddi-miR-7104, stu-miR167d-3p, gma-miR319o, ata-miR5084-5p
LHCB3 At5g54270 MDK4.9	11	ppt-miR1211-5p, aly-miR319a-5p, aly-miR3443-3p, osa-miR5790, bna-miR2111c, bdi-miR7776-3p.2, stu-miR7987, tae-miR9655-3p, bra-miR319-5p, bra-miR2111-5p, ata-miR5084-3p
LHCB3 At5g54270 MDK4.9	11	zma-miR159b-5p, osa-miR2098-3p, mtr-miR2199, mtr-miR2604, zma-miR159j-5p, zma-miR159k-5p, bdi-miR5067, bdi-miR5174a, rgl-miR5578, nta-miR6163, bra-miR9554-5p
CAB91R	11	zma-miR399c-5p, ptc-miR478a, ptc-miR478b, ptc-miR478c, ptc-miR478d, ptc-miR478f, ptc-miR478p, mtr-miR1510a-5p, gma-miR4372a, gma-miR5374-5p, sbi-miR6231-5p
CAB91R	11	osa-miR399h, ptc-miR477a-3p, smo-miR1095a, smo-miR1095b, osa-miR1438, osa-miR1438, ptc-miR1450, gma-miR4361, csi-miR3947-5p, osa-miR5144-5p, mtr-miR5231
CAB91R	11	ptc-miR1444b, ptc-miR1444c, gma-miR4415a-3p, gma-miR4415b-3p, osa-miR5543, ath-miR5997, bdi-miR7729a-3p, bdi-miR7729b-3p, gra-miR8743a, bra-miR9567-5p, bra-miR9563b-3p
At5g60760 MAE1.1	11	zma-miR162-5p, ath-miR2111a-3p, bna-miR2111a-3p, aly-miR2111a-3p, bra-miR2111a-3p, ptc-miR477d-3p, bdi-miR7785-5p, stu-miR7980a, stu-miR7982a, stu-miR7982b, aly-miR2111c-3p
LPA1 Os02g0819400 LOC_Os02g57400 OsJ_08893	11	osa-miR393b-3p, zma-miR393a-3p, ath-miR838, zma-miR393c-3p, bdi-miR393b-3p, osa-miR5833, bna-miR162a, ddi-miR-7097, stu-miR8001a, gra-miR8666, gma-miR4348b
	11	osa-miR816, vvi-miR477b-5p, mtr-miR5272a, mtr-miR5272b, mtr-miR5272c, mtr-miR5272d, mtr-miR5272e, mtr-miR5274b-5p, gra-miR8742a, gra-miR8742b, sly-miR9476-3p
LCKB2 At2g46090 T3F17.26	11	ath-miR420, osa-miR2878-5p, mtr-miR5226, pti-miR5475, mtr-miR7696a-5p, mtr-miR7696b-5p, bdi-miR7757-3p.1, sly-miR9476-3p, tae-miR1120c-5p, tae-miR6197-5p, gma-miR9762
MYB3R4 EDC At5g11510 F15N18.100	11	cre-miR1165-3p, osa-miR2878-5p, mtr-miR5226, pti-miR5475, mtr-miR7696a-5p, mtr-miR7696b-5p, bdi-miR7757-3p.1, sly-miR9476-3p, tae-miR1120c-5p, tae-miR6197-5p, gma-miR9762
ATI1 At2g45980	11	osa-miR156b-3p, zma-miR156b-3p, mtr-miR156b-3p, mtr-miR156c-3p, vvi-miR172b, osa-miR1426, aly-miR156f-3p, osa-miR812o-5p, mes-miR172c, bra-miR156b-3p, bra-miR156d-3p
ATI1 At2g45980	11	ath-miR777, ppt-miR902j-3p, osa-miR827, zma-miR827-3p, aly-miR163-5p.2, bdi-miR827-3p, ssp-miR827, sbi-miR5386, rgl-miR7801, bra-miR9558-5p, bra-miR9561-3p
ATI1 At2g45980	11	osa-miR2095-5p, ptc-miR477d-5p, gma-miR9746a, gma-miR9746b, gma-miR9746c, gma-miR9746d, gma-miR9746e, gma-miR9746f, gma-miR9746g, gma-miR9746h, gma-miR9746i
SCL27 At2g45160 T14P1.3	11	osa-miR821a, osa-miR821b, osa-miR821c, ath-miR841a-5p, osa-miR2096-3p, aly-miR164c-3p, gma-miR4397-5p, ptc-miR6430, ddi-miR-7105, tae-miR9678-3p, bra-miR6032-5p
SCL6 At4g00150 F6N15.20	11	osa-miR821a, osa-miR821b, osa-miR821c, ath-miR841a-5p, osa-miR2096-3p, aly-miR164c-3p, gma-miR4397-5p, ptc-miR6430, ddi-miR-7105, tae-miR9678-3p, bra-miR6032-5p
SCL6 At4g00150 F6N15.20	11	aly-miR839-3p, aly-miR860-3p, aly-miR3436-5p, aly-miR4227, gma-miR4389, ssl-miR948, bna-miR860, cca-miR6116-3p, tae-miR9652-5p, tae-miR9656-3p, bra-miR860-3p
CAS2	11	ath-miR172d-5p, zma-miR399f-5p, ath-miR855, pvu-miR2118, aly-miR172d-5p, gso-miR2218, aly-miR4238, vun-miR2118, hme-miR-279c, bdi-miR7708b-3p, tae-miR1137b-5p
MED26C MED26_3 At5g09850 MYH9.6	11	zma-miR162-5p, ppt-miR1211-5p, smo-miR1110, osa-miR1425-3p, sly-miR1919c-5p, mtr-miR2642, osa-miR5504, ghr-miR7500, lja-miR7543, stu-miR1919-5p, gra-miR8649
PYL8 ABIP1 RCAR3 At5g53160 MFH8.10	11	osa-miR167a-3p, zma-miR167a-3p, mtr-miR398a-5p, pta-miR947, bdi-miR395e-5p, nta-miR6025e, hbr-miR6171, hme-miR-929, pde-miR947, stu-miR6149-5p, ata-miR395c-5p
Os11g0148500 LOC_Os11g05110 OsJ_32969	11	osa-miR167a-3p, zma-miR167a-3p, mtr-miR398a-5p, pta-miR947, bdi-miR395e-5p, nta-miR6025e, hbr-miR6171, hme-miR-929, pde-miR947, stu-miR6149-5p, ata-miR395c-5p
Os11g0148500 LOC_Os11g05110 OsJ_32969	11	osa-miR444a-3p.2, smo-miR1085-5p, tae-miR1121, osa-miR444d.2, osa-miR444e, hme-miR-279a, hme-miR-279d, sbi-miR6232a-5p, rgl-miR7809, gra-miR8661, bdi-miR444b
GSVIVT00026920001 LOC100243180	11	pta-miR482c, mtr-miR5210, bra-miR5717, hbr-miR398, ptc-miR6462a, ptc-miR6462b, ptc-miR6462c-3p, ptc-miR6462d, cme-miR171i, sbi-miR6230-5p, bdi-miR7746-3p
MTERF2 EMB2219 At2g21710	11	ppt-miR1033a, ppt-miR1033b, ppt-miR1033c, ppt-miR1033d, ppt-miR1033e, osa-miR2865, sbi-miR5566, hme-miR-283, ptc-miR6452, gra-miR8730, gma-miR9746i
KAT1 At5g46240 MPL12.2	11	ppt-miR533b-3p, vvi-miR319g, aly-miR162a-5p, aly-miR162b-5p, pab-miR3694, nta-miR6145f, mtr-miR319c-3p, bdi-miR7709-3p, stu-miR162a-5p, stu-miR162b-5p, bra-miR162-5p
KAT1 At5g46240 MPL12.2	11	ppt-miR533b-3p, vvi-miR319g, aly-miR162a-5p, aly-miR162b-5p, pab-miR3694, nta-miR6145f, mtr-miR319c-3p, bdi-miR7709-3p, stu-miR162a-5p, stu-miR162b-5p, bra-miR162-5p
LPP3 At3g02600 F16B3.23	11	vvi-miR319g, aly-miR162a-5p, aly-miR162b-5p, pab-miR3694, mtr-miR5563-3p, nta-miR6145f, mtr-miR319c-3p, bdi-miR7709-3p, stu-miR162a-5p, stu-miR162b-5p, bra-miR162-5p
AVT3C At4g38250 F22I13.20	11	ath-miR846-5p, gma-miR1531-3p, aly-miR319b-5p, esi-miR3465-5p, gma-miR5039, gma-miR169n-3p, bdi-miR7775-5p, gra-miR8712, bra-miR9554-5p, bra-miR9557-3p, gma-miR167k
At1g74260 F1O17.7	11	osa-miR1849, pta-miR1312, osa-miR2105, osa-miR5517, cca-miR6111-5p, nta-miR6153, pde-miR1312, gra-miR8762a, bdi-miR9483a, bdi-miR9483b, gma-miR9752
At5g18950 F17K4_200	11	ath-miR169a-3p, ath-miR844-3p, mtr-miR2654, gma-miR169l-3p, osa-miR5793, cme-miR7130, lja-miR7540a, lja-miR7540b, mtr-miR7697-5p, bdi-miR7738-5p, gra-miR8731
At3g46220 F12M12.190	11	ath-miR391-3p, zma-miR159c-5p, zma-miR159d-5p, smo-miR1098, aly-miR391-3p, bdi-miR159a-5p, osa-miR5798, hme-miR-6302-1-5p, stu-miR8015-3p, stu-miR8040-5p, bra-miR391-3p
CRT3 At1g08450 T27G7.13	11	osa-miR1423-3p, osa-miR1862a, osa-miR1862b, osa-miR1862c, osa-miR1862d, osa-miR1862e, bdi-miR437, osa-miR1862f, osa-miR1862g, bdi-miR172a-5p, ata-miR172b-5p
SSRP1	11	ppt-miR390c-3p, cre-miR1172.1, cre-miR1159.1, osa-miR2877, aly-miR159c-5p, aly-miR4237, gma-miR4347, rgl-miR5578, nta-miR6164a, nta-miR6164b, gra-miR8729
PSAT1 At4g35630 F8D20.140	11	vvi-miR3630-5p, pab-miR3708, gma-miR4343a, mtr-miR5296, mtr-miR5554a-5p, mtr-miR5554b-5p, mtr-miR5554c-5p, hme-miR-6301-3p, ptc-miR6459a-3p, bdi-miR5174e-5p.2, bdi-miR7725b-5p.2
CHI9	11	ppt-miR533a-5p, cre-miR1144a.2, mtr-miR5212-3p, gma-miR5376, osa-miR5534b, ath-miR5628, hvu-miR6179, hme-miR-9a, stu-miR7984c-5p, stu-miR7984c-5p, gma-miR9759
rsca	11	osa-miR166k-3p, osa-miR166l-3p, sbi-miR166e, zma-miR166k-3p, zma-miR166j-3p, sbi-miR166g, zma-miR166n-3p, ptc-miR6439b, bdi-miR166h-3p, gra-miR8733, ata-miR5168-3p
CPFTSY FTSY At2g45770 F4I18.25	11	osa-miR166k-3p, osa-miR166l-3p, sbi-miR166e, zma-miR166k-3p, zma-miR166j-3p, sbi-miR166g, zma-miR166n-3p, bdi-miR5199, ptc-miR6439b, bdi-miR166h-3p, ata-miR5168-3p
CPFTSY FTSY At2g45770 F4I18.25	11	zma-miR156b-3p, ppt-miR477g-3p, mtr-miR2642, gma-miR4362, ath-miR5014b, bdi-miR156g-3p, bdi-miR156i-3p, sly-miR9472-5p, tae-miR9656-3p, ata-miR156a-3p, ata-miR156e-3p
LCY-E	11	zma-miR162-3p, ptc-miR827, gma-miR162a, osa-miR1428e-5p, osa-miR1428f-5p, osa-miR1428g-5p, gma-miR1520f-5p, ddi-miR-7095-5p, mdm-miR827, lja-miR7541, ptc-miR7817b
LCY-E	11	osa-miR396c-3p, zma-miR396f-3p, aly-miR169j-3p, aly-miR169k-3p, aly-miR169l-3p, ahy-miR3514-3p, bdi-miR396e-3p, cca-miR396c, bdi-miR7733-5p, ata-miR396c-3p, ata-miR9677-5p
LCY-E	11	osa-miR393b-3p, ppt-miR1039-3p, zma-miR393c-3p, aly-miR163-5p.2, ath-miR3434-3p, bdi-miR393b-3p, stu-miR8032a-3p, stu-miR8032e-3p, gra-miR8734, tae-miR9777, ata-miR393-3p
RPL10A OsI_30261	11	cre-miR906-5p, zma-miR169o-3p, aly-miR3441-5p.1, vvi-miR3633a-5p, pab-miR3706, gma-miR4392, gma-miR4396, mtr-miR5276, hvu-miR5049f, ghr-miR7511, lja-miR7534
RPL10A OsI_30261	11	osa-miR319a-3p, ath-miR773a, ath-miR865-3p, mtr-miR156g-3p, mtr-miR2621, esi-miR3467-3p, ahy-miR156b-3p, mtr-miR5247, bdi-miR7767-5p, rgl-miR7807b-3p, ata-miR319-3p
RPL10A OsI_30261	11	ath-miR416, osa-miR2928, esi-miR3454g-3p, esi-miR3454d-3p, mtr-miR5204, gma-miR5778, ptc-miR482c-3p, esi-miR8622a, esi-miR8622b, gra-miR8706a, gra-miR8706b
RPL10A OsI_30261	11	ptc-miR475c, ppt-miR1217-3p, osa-miR1435, osa-miR2093-5p, osa-miR2097-3p, sbi-miR1435a, aly-miR3435-3p, bdi-miR5069, osa-miR5494, lja-miR7529, sly-miR9469-5p
RPL10A OsI_30261	11	ath-miR834, ath-miR834, cre-miR1154-5p, cre-miR1154-5p, mtr-miR2600a, aly-miR834-3p, aly-miR834-3p, pab-miR3694, gma-miR5368, bdi-miR159b-5p.3, gra-miR8648
RPL10A OsI_30261	11	ppt-miR1219a, ppt-miR1219b, ppt-miR1219c, ppt-miR1219d, ath-miR857, tae-miR1135, aly-miR857-3p, esi-miR3452-3p, bdi-miR5172-3p, bdi-miR7771-3p, gra-miR8672
TIFY10B JAZ7 OsI_26864	11	ppt-miR160c, ppt-miR160d, ppt-miR160g, ppt-miR160h, esi-miR3450-5p, osa-miR5157a-5p, osa-miR5157b-5p, mtr-miR2619b-5p, dpr-miR160, ptc-miR6435, bdi-miR7711-3p.3
TIFY10B JAZ2 At1g74950 F25A4.8 F9E10.20	11	osa-miR820a, osa-miR820b, osa-miR820c, ppt-miR900-5p, esi-miR3454a-5p, esi-miR3454c-5p, esi-miR3454b-5p, esi-miR3454e-5p, osa-miR5075, mtr-miR399s-5p, bdi-miR7772-5p
TIFY10B JAZ7 OsI_26864	11	ppt-miR1028a-3p, osa-miR2105, zma-miR2275b-3p, zma-miR2275c-3p, mtr-miR2645, ath-miR5014a-3p, osa-miR2863c, bdi-miR395d-3p, bdi-miR159b-3p.3, bdi-miR7741-5p.2, ata-miR6201-3p
CNGC4 HLM1 At5g54250 MDK4.7	11	mtr-miR2620, aly-miR3435-5p, gma-miR169i-3p, bdi-miR166g-3p, mtr-miR2600b, mtr-miR2600c, mtr-miR2600d, mtr-miR2600e, bra-miR5725, bdi-miR166i-5p, cpa-miR8140
ASP5 AAT1 AAT3 At4g31990 F10N7.200	11	ptc-miR478a, ptc-miR478b, ptc-miR478c, ppt-miR1078, gma-miR159d, hvu-miR5051, bdi-miR7724a-3p, bdi-miR7724b-3p, bdi-miR7726b-5p, bdi-miR7768a-3p, bdi-miR7768b-3p
RPL5 At4g01310 A_IG002N01.3 F2N1.5	11	zma-miR395c-5p, zma-miR395d-5p, zma-miR395g-5p, bdi-miR395c-5p, bdi-miR395g-5p, bdi-miR395h-5p, bdi-miR395k-5p, bdi-miR395l-5p, bdi-miR395n-5p, bdi-miR395p-5p, ata-miR395b-5p
COL10 At5g48250 MIF21.14	11	aly-miR156g-3p, ath-miR5641, osa-miR5831, hbr-miR6175, cme-miR171i, stu-miR8032b-3p, stu-miR8032f-3p, stu-miR8032g-3p, tae-miR9652-3p, tae-miR9665-3p, tae-miR6197-5p
COL10 At5g48250 MIF21.14	11	ppt-miR1038-5p, vvi-miR169b, vvi-miR169h, mtr-miR2599, bdi-miR1878-3p, mtr-miR5246, sly-miR6027-5p, sbi-miR6230-5p, lja-miR7521, ptc-miR6462e, ptc-miR6462f
COL10 At5g48250 MIF21.14	11	osa-miR415, ptc-miR399h, ath-miR472-5p, osa-miR1846d-5p, aly-miR472-5p, gma-miR4371b, mtr-miR5219, hvu-miR5049d, ghr-miR7506, rgl-miR7797a, esi-miR8624b
CPK29 At1g76040 T4O12.25	11	ath-miR840-3p, pta-miR156b, aly-miR840-3p, esi-miR3453-3p, gma-miR5038a, mtr-miR5255, gma-miR5038b, sbi-miR5565e, osa-miR5792, stu-miR8024a-3p, stu-miR8024b
TPC1 Os01g0678500 LOC_Os01g48680 B1144G04.26-1 OsJ_03004	11	mtr-miR2664a, osa-miR2928, gma-miR5370, osa-miR5837.1, hme-miR-137, hme-miR-3286, hme-miR-6302-2-5p, mtr-miR2664b, bdi-miR397b-3p, rgl-miR7798, rgl-miR7804-3p
TPC1	11	mtr-miR2629a, mtr-miR2629d, mtr-miR2629e, mtr-miR2629b, mtr-miR2629c, mtr-miR2629f, mtr-miR2629g, esi-miR3454f-3p, esi-miR3454b-3p, osa-miR5529, gra-miR167c
AVT1C At2g39130 T16B24.23 T7F6.1	11	smo-miR1098, aly-miR3441-5p.2, gma-miR4352b, gma-miR482c-5p, mtr-miR5289a, mtr-miR5289b, mtr-miR5293, mtr-miR5559-3p, ptc-miR6421-5p, tae-miR1120c-5p, ata-miR166b-5p
ADIPOR1 Os06g0643700 LOC_Os06g43620 P0017B12.2 P0416A11.35	11	cre-miR906-5p, sly-miR397, gma-miR5030, osa-miR5535, hbr-miR6170, ptc-miR6460, mdm-miR397a, mdm-miR397b, sbi-miR5568c-3p, mes-miR397, stu-miR397-5p
HHP1 At5g20270 F5O24.160	11	cre-miR906-5p, sly-miR397, gma-miR5030, nta-miR827, ptc-miR6460, mdm-miR397a, mdm-miR397b, sbi-miR5568c-3p, mes-miR397, stu-miR827-3p, stu-miR397-5p
	11	cre-miR906-5p, sly-miR397, gma-miR5030, nta-miR827, ptc-miR6460, mdm-miR397a, mdm-miR397b, sbi-miR5568c-3p, mes-miR397, stu-miR827-3p, stu-miR397-5p
CDC48D At3g53230 T4D2.160	11	tae-miR1137a, mtr-miR2667a, aly-miR403a-5p, ath-miR5021, gma-miR5678, mtr-miR2667b, bdi-miR7724a-3p, bdi-miR7724b-3p, bdi-miR7728-5p, aly-miR403b-5p, gma-miR9752
CYP734A6 Os01g0388000 LOC_Os01g29150 OSJNBb0008D07.26	11	ath-miR864-3p, smo-miR1106, cre-miR1147.2, mtr-miR2627, aly-miR400-3p, tcc-miR169n, gma-miR2111a, gma-miR2111d, bna-miR6036, gra-miR8784, tae-miR1127b-3p
	11	ath-miR3434-3p, aly-miR4245, csi-miR3951, mtr-miR5274b-3p, ath-miR4245, sbi-miR6230-5p, mtr-miR7696a-3p, mtr-miR7696b-3p, mtr-miR7701-5p, gra-miR8633, gra-miR8668
CPR	11	ath-miR400, ath-miR861-5p, ppt-miR893, aly-miR400-5p, aly-miR861-5p, sbi-miR6223-5p, lja-miR7540a, lja-miR7540b, bdi-miR9491, tae-miR5049-3p, bra-miR400-5p
CPR	11	osa-miR319a-3p, cre-miR1163.2, osa-miR2864.2, ahy-miR3516, mtr-miR5282, hvu-miR6183, ptc-miR482b-3p, gra-miR8660, gra-miR8707, bdi-miR9486a, ata-miR319-3p
MET1 GAN ZKT At1g55480 T5A14.12	11	osa-miR160c-3p, zma-miR171j-5p, osa-miR816, ghr-miR2948-5p, aly-miR391-3p, vvi-miR3631a-3p, gma-miR4342, gma-miR5037a, bdi-miR160d-3p, gra-miR8634, gra-miR8641
PTEN2A PTEN2 At3g19420 MLD14.15	11	osa-miR435, ath-miR829-5p, aly-miR829-5p, far-miR164a, far-miR164b, osa-miR5543, gma-miR5671a, lja-miR7534, bdi-miR7717b-5p, gra-miR8771a, gra-miR8771b
PTEN2A PTEN2 At3g19420 MLD14.15	11	ppt-miR1064-3p, osa-miR1882a, osa-miR1882b, osa-miR1882c, osa-miR1882d, osa-miR1882e-5p, osa-miR1882f, osa-miR1882g, osa-miR1882h, bdi-miR7741-3p.1, bra-miR9553-3p
PTEN2A PTEN2 At3g19420 MLD14.15	11	cre-miR910, cre-miR912, osa-miR1430, mtr-miR5211, ath-miR5652, ath-miR5657, nta-miR172b, nta-miR6145a, ptc-miR828b-3p, tae-miR167c-5p, ata-miR167f-5p
TIM50 EMB1860 At1g55900 F14J16.15	11	osa-miR172c, sbi-miR172e, gma-miR172k, egu-miR172d, egu-miR172e, egu-miR172f, hme-miR-6307-3p, pde-miR949a, ptc-miR7828, stu-miR7997a, stu-miR7997b
ATHB-6 At2g22430 F14M13.17	11	ath-miR837-3p, mtr-miR2639, aly-miR163-3p.2, aly-miR774b-3p, gma-miR5373, hme-miR-998, ptc-miR6471, bdi-miR7716-5p, bdi-miR7776-3p.1, rgl-miR7972, gra-miR8688
HOX20 Os08g0481400 LOC_Os08g37580 OSJNBb0092C08.26	11	mtr-miR319a-5p, smo-miR1112-5p, esi-miR3451-5p, hvu-miR5052, ath-miR5663-3p, ghr-miR7511, bdi-miR7711-5p.1, ptc-miR7832, stu-miR319a-5p, gra-miR7494e, gra-miR7494f
PBL26 At3g07070 F17A9.25 T1B9.28	11	gma-miR1514b-5p, pvu-miR1514a, aly-miR395e-5p, aly-miR395g-5p, aly-miR4235, mtr-miR5221, gra-miR8719, bra-miR395d-5p, bra-miR395b-5p, bra-miR395c-5p, bra-miR395a-5p
GLCAT14B At5g15050 F2G14.170	11	ath-miR829-3p.2, mtr-miR2592b-5p, mtr-miR2592s-5p, vvi-miR3626-3p, pab-miR3709a, bdi-miR5200c, mtr-miR5260, cca-miR6118-5p, stu-miR1886g-5p, ath-miR8179, sly-miR5302b-3p
CML7 Os08g0117400 LOC_Os08g02420 OsJ_024805 P0470F10.20	11	osa-miR160a-3p, osa-miR160b-3p, zma-miR160b-3p, zma-miR160g-3p, aly-miR160c-3p, osa-miR5144-3p, bdi-miR160b-3p, bdi-miR160c-3p, osa-miR5523, bra-miR5723, ata-miR160c-3p
RTNLB8 At3g10260 F14P13.14	11	cre-miR1151a-5p, mtr-miR2677, aly-miR3448-5p, mtr-miR5230, ptc-miR6431, lja-miR7534, stu-miR5303c, stu-miR5303a, stu-miR5303b, stu-miR5303d, gra-miR8777
RTNLB8 At3g10260 F14P13.14	11	pta-miR159b, ppt-miR1059, gma-miR2109-5p, aly-miR169m-3p, gso-miR2109, nta-miR6021, hme-miR-278, ptc-miR7831, stu-miR8007a-3p, stu-miR8007b-3p, ata-miR9674b-3p
PCMP-H82 At3g62890 F26K9_320	11	ptc-miR394b-3p, ath-miR831-5p, aly-miR825-5p, bdi-miR5068, mtr-miR5212-3p, osa-miR5485, bra-miR1885b, ath-miR8180, sly-miR9471a-3p, sly-miR9477-5p, ata-miR399b-5p
PCMP-E81 At3g04750 F7O18.24	11	aly-miR395e-5p, aly-miR395g-5p, mtr-miR5230, mtr-miR5754, sly-miR168a-3p, stu-miR8015-3p, bra-miR395d-5p, bra-miR395b-5p, bra-miR395c-5p, bra-miR395a-5p, ata-miR9776-5p
SVR3 At5g13650 MSH12.11	11	ath-miR830-5p, smo-miR1109, aly-miR169h-3p, aly-miR169j-3p, aly-miR169k-3p, aly-miR169l-3p, bdi-miR169e-3p, mtr-miR5259, ath-miR5595a, ath-miR5995b, ata-miR169i-3p
SVR3 At5g13650 MSH12.11	11	osa-miR166g-5p, osa-miR166i-5p, aly-miR160b-3p, aly-miR167d-3p, bdi-miR5060, gma-miR169j-3p, pti-miR5480, sbi-miR5565d, osa-miR5836, stu-miR8031, gra-miR8712
SVR3 At5g13650 MSH12.11	11	ptc-miR398c-5p, osa-miR2879, esi-miR3467-5p, mtr-miR5276, mtr-miR2600b, mtr-miR2600c, mtr-miR2600d, mtr-miR5759, bdi-miR7729a-3p, gra-miR7486f, gra-miR7486g
Os08g0237200 LOC_Os08g13930 OsJ_04069 P0682A06.20	11	osa-miR166e-3p, osa-miR167h-3p, osa-miR166i-3p, osa-miR444a-5p, osa-miR2920, osa-miR2923, bdi-miR5178-3p, gma-miR166m, hme-miR-6303-5p, ptc-miR6458, ata-miR408-3p
ILR3 BHLH105 EN133 At5g54680 K5F14.2	11	ptc-miR530b, ptc-miR530b, mtr-miR2617a, mtr-miR2617c, mtr-miR2617b, aqc-miR408, aqc-miR530, aqc-miR530, aly-miR847-3p, ddi-miR-7105, tae-miR9779
ILR3 BHLH105 EN133 At5g54680 K5F14.2	11	tae-miR1124, zma-miR159e-3p, hvu-miR5049b, ptc-miR6472, ptc-miR6474, pde-miR159, stu-miR7981-5p, gra-miR8731, gra-miR8709b, bra-miR9564-3p, tae-miR9675-3p
ILR3 BHLH105 EN133 At5g54680 K5F14.2	11	zma-miR159a-5p, aly-miR829-5p, osa-miR5079a, osa-miR5503, osa-miR5517, hme-miR-6303-5p, ddi-miR-7131a-5p, bdi-miR159b-5p.1, osa-miR5079b, gra-miR7506b, ata-miR9672-5p
NET2A At1g58215 T18I24.12	10	pta-miR949, smo-miR1082b, pta-miR1316, sbi-miR821a, sbi-miR821c, aly-miR3445-5p.1, pde-miR949b, stu-miR397-3p, gra-miR8672, bra-miR161-3p
RPI1 RSW10 At1g71100 F23N20.9	10	osa-miR171f-5p, zma-miR171a-5p, zma-miR171i-5p, ppt-miR898b, ppt-miR898a-5p, mtr-miR2596, bdi-miR7759-5p, ata-miR9772a-3p, ata-miR9772b-3p, ata-miR171b-5p
LIF2 At4g00830 A_TM018A10.14 T18A10.13	10	gma-miR4353, gra-miR8639a, gra-miR8639b, gra-miR8639c, gra-miR8639f, gra-miR8639g, gra-miR8639h, gra-miR8639i, gra-miR8639d, gra-miR8639e
LIF2 At4g00830 A_TM018A10.14 T18A10.13	10	ath-miR160c-3p, osa-miR160a-3p, osa-miR160b-3p, zma-miR160b-3p, zma-miR160g-3p, aly-miR160c-3p, bdi-miR160b-3p, bdi-miR160c-3p, sbi-miR5566, ata-miR160c-3p
ROPGEF7 At5g02010 T7H20.60	10	ath-miR160c-3p, osa-miR160a-3p, osa-miR160b-3p, zma-miR160b-3p, zma-miR160g-3p, aly-miR160c-3p, bdi-miR160b-3p, bdi-miR160c-3p, sbi-miR5566, ata-miR160c-3p
SIGA SIG1 YGL13 Os08g0163400 LOC_Os08g06630 OJ9990_A01.116-1 OJ9990_A01.116-2	10	ath-miR2933a, ath-miR2933b, cca-miR6109, ddi-miR-7101, stu-miR5303c, stu-miR5303a, stu-miR5303b, stu-miR5303d, stu-miR5303e, stu-miR5303f
SIGA SIG1 YGL13 Os08g0163400 LOC_Os08g06630 OJ9990_A01.116-1 OJ9990_A01.116-2	10	ath-miR780.1, ath-miR781a, cre-miR908.2, aly-miR781-5p, mtr-miR5264, ath-miR781b, mtr-miR5751, bdi-miR7724a-5p, bdi-miR7724b-5p, bra-miR9564-5p
SIGA RPOD1 SIG1 SIG2 SIGB At1g64860 F13O11.16	10	gma-miR482a-5p, osa-miR5155, hme-miR-993, hme-miR-6301-3p, ptc-miR6461, ghr-miR7486a, ghr-miR7486b, gra-miR8771a, gra-miR8771b, sly-miR477-5p
Os03g0120900 LOC_Os03g02900 OJ1705B08.4	10	osa-miR171i-5p, zma-miR164d-3p, mtr-miR2653a, mtr-miR2653b, mtr-miR2653c, aly-miR3448-3p, nta-miR6156, mtr-miR2653d, bdi-miR5174e-3p.1, bdi-miR5174b-3p
HSP83A	10	ppt-miR533a-3p, ppt-miR533b-3p, ppt-miR533c, ppt-miR533d, smo-miR1080, mtr-miR2640, mtr-miR2640, ath-miR2934-5p, gma-miR5375, ata-miR169c-3p
	10	ath-miR831-3p, ppt-miR1064-5p, mdm-miR482a-3p, mtr-miR2635, mtr-miR5233, osa-miR5830, mdm-miR169e, mdm-miR169f, gra-miR8642, bra-miR6032-3p
OMT2	10	osa-miR1861a, osa-miR1861b, osa-miR1861d, osa-miR1861f, osa-miR1861i, osa-miR1861l, osa-miR7693-5p, stu-miR8025-5p, osa-miR1861o, ata-miR5200-5p
CML4 Os03g0743500 LOC_Os03g53200 OsJ_12528 OSJNBb0036F07.4	10	ptc-miR481a, ptc-miR481b, ptc-miR481c, ath-miR854a, ath-miR854b, ath-miR854c, ath-miR854d, ath-miR854e, hvu-miR6186, hvu-miR6186
RING1	10	ath-miR167c-5p, ath-miR841a-5p, aly-miR167c-5p, ath-miR841b-5p, mtr-miR2592bi, mtr-miR2592bj, mtr-miR2592bk, mtr-miR5276, mtr-miR5745a, ata-miR171a-5p
RING1	10	ath-miR832-3p, osa-miR1846d-3p, vvi-miR3633b-5p, pab-miR3694, hme-miR-193-5p, osa-miR5145, bdi-miR164c-3p, ath-miR5020c, ptc-miR6421-5p, ata-miR408-3p
RPN9B At4g19006 F13C5.4	10	mtr-miR319b-5p, mtr-miR2591, hvu-miR5052, lja-miR7543, bdi-miR7724a-5p, bdi-miR7724b-5p, gra-miR8755, bra-miR9552a-5p, bra-miR9552b-5p, bra-miR9563b-5p
CSI1 POM2 At2g22125 T16B14.2	10	ppt-miR1038-3p, cre-miR1166.2, aly-miR319c-5p, aly-miR319d-5p, vvi-miR3627-3p, vvi-miR3632-5p, mtr-miR5204, mtr-miR5276, hvu-miR6197, ptc-miR6439b
RggA	10	zma-miR171g-5p, aqc-miR167, mtr-miR5558-3p, ath-miR5651, cme-miR167e, sbi-miR6220-5p, stu-miR8005a, stu-miR8005b-3p, stu-miR8005c, gra-miR8665
RggA	10	osa-miR1442, gma-miR4351, mtr-miR5205c, mtr-miR5205d, mtr-miR5291a, mtr-miR5291b, mtr-miR5291c, nta-miR6025c, bdi-miR7755-5p, ptc-miR7842
BTR1 At5g04430 T32M21_30	10	ath-miR472-5p, aqu-miR-2014-5p, aly-miR472-5p, vvi-miR2950-5p, gma-miR4996, osa-miR5499, mes-miR2950, gra-miR8643a, gra-miR8643b, gma-miR9755
CPR	10	osa-miR528-5p, aqu-miR-2018-5p, zma-miR528a-5p, zma-miR528b-5p, sbi-miR528, esi-miR3453-5p, bdi-miR528-5p, ssp-miR528, mtr-miR5298a, ata-miR528-5p
ADK2 At5g03300 F12E4.30 MOK16.21	10	osa-miR166b-5p, zma-miR166a-5p, ppt-miR1221-5p, esi-miR3469-3p, pab-miR3710, hvu-miR5049a, bdi-miR166b-5p, osa-miR5542, ptc-miR6435, ata-miR166d-5p
ILL1 IAR OsI_002388	10	ath-miR162a-5p, ath-miR162b-5p, csi-miR162-5p, aly-miR162a-5p, aly-miR162b-5p, osa-miR5338, stu-miR162a-5p, stu-miR162b-5p, sly-miR164b-3p, bra-miR162-5p
ILL1 IAR OsI_002388	10	osa-miR530-3p, ppt-miR895, cre-miR1162-3p, mtr-miR2087-5p, mtr-miR5236a, mtr-miR5236b, mtr-miR5236c, mtr-miR5236d, mtr-miR5236e, ath-miR826b
ATR2 AR2 At4g30210 F9N11.60	10	ath-miR854a, ath-miR854b, ath-miR854c, ath-miR854d, cre-miR1165-5p, vvi-miR399g, ath-miR854e, hvu-miR6209, ptc-miR6429, gma-miR9722
FLZ10 DUF581-14 At5g11460 F15N18.50	10	ath-miR2934-5p, ptc-miR6435, stu-miR8032a-5p, stu-miR8032b-5p, stu-miR8032c, stu-miR8032d-5p, stu-miR8032e-5p, stu-miR8032f-5p, stu-miR8032g-5p, bra-miR9552a-3p
GATA1 At3g24050 F14O13.24	10	mtr-miR2601, ath-miR5639-5p, mtr-miR5740, stu-miR1886a, stu-miR1886b, stu-miR1886c, stu-miR1886d, stu-miR1886e, stu-miR1886f, stu-miR8026
CIGR1 Os07g0545800 LOC_Os07g36170 OsJ_24639 P0006G05.102	10	ptc-miR156k, vvi-miR156a, gma-miR1517, mtr-miR2675, bdi-miR5181a-3p, dpr-miR156a, hci-miR156b, har-miR156c, cme-miR156h, cme-miR156g
At5g04720 MUK11.4 T1E3.80	10	ath-miR168b-3p, ath-miR447a.2-3p, ptc-miR1450, sbi-miR821d, mtr-miR2622, aly-miR168b-3p, aly-miR834-5p, ahy-miR3514-5p, ptc-miR477c, bdi-miR7723a-5p
At4g33300 F17M5.60	10	ath-miR417, smo-miR1113, cre-miR1153-3p.1, csi-miR3947-5p, gma-miR171i-5p, mtr-miR5212-3p, osa-miR5814, tae-miR9672a-3p, tae-miR9672b, ata-miR9672-3p
RPL17	10	ptc-miR390d-3p, ppt-miR1222a, ppt-miR1222b, ppt-miR1222c, ppt-miR1222e, osa-miR2122, gma-miR5371-5p, stu-miR390-3p, sly-miR390a-3p, bra-miR9557-5p
PCAP1 MDP25 At4g20260 F1C12.180	10	ppt-miR1057, ppt-miR1064-5p, osa-miR1846a-3p, osa-miR1846b-3p, osa-miR1846c-3p, zma-miR2275a-5p, ath-miR3440b-5p, osa-miR2275c, gra-miR8648, ata-miR2275b-5p
GSTU8 At3g09270 F3L24.14	10	zma-miR164c-3p, ddi-miR-1177, ddi-miR-1177, ddi-miR-1177, zma-miR164h-3p, bdi-miR164a-3p, bdi-miR164c-3p, ath-miR5652, bdi-miR7776-5p.2, ata-miR164b-3p
TOM2A At1g32400 F5D14.22	10	cre-miR1153-3p.2, mtr-miR1509a-3p, sbi-miR1432, zma-miR1432-5p, mtr-miR5205a, mtr-miR5205b, sbi-miR5568c-3p, sbi-miR5568f-3p, bdi-miR1432, ata-miR1432-5p
TOM2A At1g32400 F5D14.22	10	ath-miR415, osa-miR415, ptc-miR476a, ptc-miR476b, sly-miR1917, mtr-miR1510b-5p, osa-miR3982-3p, osa-miR5497, stu-miR7988, tae-miR1122c-3p
EDR2L At5g45560 MFC19.23	10	ath-miR837-5p, ath-miR1886.1, zma-miR159e-5p, ath-miR4227, mtr-miR4414a-3p, mtr-miR5297, osa-miR812v, ath-miR8176, bra-miR9555b-5p, tae-miR9781
EDR2L At5g45560 MFC19.23	10	aly-miR159a-5p, vvi-miR3631a-5p, vvi-miR3631b-5p, vvi-miR3631c, vvi-miR3631d, pab-miR3696, pab-miR3704, gma-miR4997, cme-miR399g, gma-miR319p
	10	ath-miR847, ghr-miR3476-3p, ahy-miR3519, osa-miR5489, mdm-miR7127a, mdm-miR7127b, sbi-miR5568c-5p, cpa-miR8138, cpa-miR8154, gma-miR5780c
	10	aly-miR833-5p, aly-miR860-5p, esi-miR3460-5p, mtr-miR5242, gma-miR5677, sbi-miR6222-5p, sbi-miR6224a-3p, sbi-miR6224b-3p, sbi-miR6224c-3p, bra-miR9566-3p
RIN4 At3g25070 MJL12_1	10	aly-miR160b-3p, lja-miR7526a, lja-miR7526b, lja-miR7526c, lja-miR7526d, lja-miR7526e, lja-miR7526f, lja-miR7526g, lja-miR7526h, gra-miR8665
At3g54460 T14E10.30	10	zma-miR168a-3p, zma-miR168b-3p, ppt-miR390c-3p, vvi-miR3630-3p, hme-miR-2765, bdi-miR7731-3p, bdi-miR7731-3p, stu-miR8040-5p, bra-miR168a-3p, ata-miR166b-5p
TIF	10	esi-miR3454g-5p, esi-miR3454a-5p, esi-miR3454c-5p, esi-miR3454f-5p, esi-miR3454b-5p, esi-miR3454e-5p, esi-miR3454d-5p, mtr-miR5246, bra-miR5722, gra-miR7505b
TIF	10	osa-miR2091-5p, osa-miR2923, esi-miR3466-3p, aly-miR4244, gma-miR4360, gma-miR5374-3p, hvu-miR5049b, pde-miR482c, stu-miR398a-5p, tae-miR9782
4CL1	10	mtr-miR2679a, mtr-miR2679b, mtr-miR2679c, zma-miR159f-5p, pab-miR3693, osa-miR5819, hvu-miR6192, ghr-miR7500, bdi-miR7726a-5p, gma-miR9767
RPS10-1 Os02g0549600 LOC_Os02g34460 OsJ_07087 OSJNBa0040I22.20 P0451A10.8	10	osa-miR167d-3p, zma-miR167e-3p, smo-miR1099, ath-miR1887, mtr-miR2651, aly-miR3436-5p, gma-miR1520h, bdi-miR167c-3p, mtr-miR5219, gma-miR3522
RPS10-1 Os02g0549600 LOC_Os02g34460 OsJ_07087 OSJNBa0040I22.20 P0451A10.8	10	ppt-miR1042-5p, osa-miR1846a-5p, osa-miR1846b-5p, osa-miR1846c-5p, zma-miR396g-5p, zma-miR396h, mtr-miR5273, stu-miR6022, sly-miR6022, cca-miR396b
TMN1 EMP12 At1g10950 T19D16.13	10	ppt-miR1031a, ppt-miR1031b, aly-miR169h-3p, aly-miR169m-3p, aly-miR844-3p, bdi-miR5059, bdi-miR7719-5p, stu-miR7986, gra-miR8709b, gra-miR8768
XBOS32 Os02g0791200 LOC_Os02g54860 OJ1046_F07.26 OsJ_08676	10	ath-miR391-5p, ath-miR401, aly-miR391-5p, gma-miR5037b, bra-miR5719, osa-miR5793, hbr-miR6482, cme-miR7129, bra-miR391-5p, cre-miR9897-5p
PBL21 ASG5 At1g20650 F2D10.13 F5M15.3	10	ppt-miR902k-3p, cre-miR1170.2, aly-miR4240, gma-miR4354, gma-miR5667-5p, stu-miR482b-3p, osa-miR5337b, hme-miR-6302-1-5p, sbi-miR5568c-5p, tae-miR9679-5p
FIGL1 At3g27120 MOJ10.20	10	ppt-miR902k-3p, cre-miR1170.2, aly-miR4240, gma-miR4354, gma-miR5667-5p, stu-miR482b-3p, osa-miR5337b, hme-miR-6302-1-5p, sbi-miR5568c-5p, tae-miR9679-5p
AAA1 BOT1 ERH3 FRA2 FTR KSS KTN1 LUE1 At1g80350 F5I6.10	10	mtr-miR2680a, mtr-miR2680b, mtr-miR2680c, mtr-miR2680d, mtr-miR2680e, osa-miR5493, bna-miR6035, rgl-miR7803b-3p, tae-miR9652-5p, cre-miR9897-5p
At2g30550 T6B20.10	10	ath-miR775, gma-miR1523a, osa-miR2096-5p, mtr-miR2679a, mtr-miR2679b, mtr-miR2679c, ptc-miR6437b, ptc-miR6437a, ghr-miR7513, bra-miR9556-3p
PER21 P21 At2g37130 T2N18.11	10	ptc-miR1446a, ptc-miR1446b, ptc-miR1446c, ptc-miR1446d, ptc-miR1446e, mtr-miR2650, mes-miR1446, stu-miR3627-3p, gma-miR9754, ata-miR6201-3p
At1g27930 F13K9.4	10	mtr-miR2088-5p, osa-miR2098-3p, sly-miR5300, mtr-miR2592bl-3p, bra-miR5654a, bra-miR5654b, stu-miR482d-3p, sly-miR482b, gra-miR8632, gra-miR7504g
LDL3 At4g16310/At4g16320 dl4185w/dl4190w FCAALL.342/FCAALL.344	10	ptc-miR478e, ptc-miR482a.2, aqc-miR482a, aqc-miR482b, aqc-miR482c, gra-miR482, aly-miR831-3p, nta-miR6145c, bdi-miR5174c-5p, stu-miR8024a-5p
MGS1	10	ppt-miR536a, ppt-miR536b, ppt-miR536d, ppt-miR536e, ppt-miR536f, smo-miR1115-5p, mtr-miR2673a, mtr-miR2673b, gra-miR7504g, bra-miR2111-3p
MGS1	10	zma-miR2275b-3p, zma-miR2275c-3p, aly-miR160b-3p, gma-miR166i-5p, sbi-miR5564b, hme-miR-276, sbi-miR5564c-5p, stu-miR8038a-3p, stu-miR8038b-3p, stu-miR166d-5p
Os12g0580900 LOC_Os12g39120	10	cre-miR1168.1, mtr-miR5244, osa-miR5522, nta-miR5303c, bdi-miR5167b-5p, bdi-miR5049-3p, bdi-miR7755-5p, rgl-miR7807a-3p, rgl-miR7807b-3p, gra-miR8777
Os12g0580900 LOC_Os12g39120	10	tae-miR1124, gma-miR1520c, zma-miR399j-5p, esi-miR3462-3p, vvi-miR3631b-3p, vvi-miR3637-5p, mtr-miR2592bm-3p, mtr-miR2592bn-3p, lja-miR7522, bdi-miR9493
Os12g0580900 LOC_Os12g39120	10	tae-miR1124, gma-miR1520c, zma-miR399j-5p, esi-miR3462-3p, vvi-miR3631b-3p, vvi-miR3637-5p, mtr-miR2592bm-3p, mtr-miR2592bn-3p, lja-miR7522, bdi-miR9493
PVA42 At4g21450 F18E5.70	10	ath-miR4228-3p, ath-miR4228-3p, gma-miR1520i, hvu-miR5053, mtr-miR5559-3p, osa-miR5819, lja-miR7520, esi-miR8623c, gma-miR167k, gma-miR9760
PVA42 At4g21450 F18E5.70	10	ath-miR391-3p, ath-miR839-5p, gma-miR1514b-5p, osa-miR2120, aly-miR391-3p, aly-miR839-5p, aly-miR395h-5p, aly-miR4225, osa-miR3979-5p, bra-miR391-3p
MPP	10	ath-miR391-3p, vvi-miR399f, aly-miR391-3p, aly-miR838-3p, ath-miR4228-5p, bdi-miR5059, stu-miR8051-3p, tae-miR9676-5p, bra-miR391-3p, gma-miR9731
TRAF1B MUSE13 At1g04300 F19P19.26	10	smo-miR1114, pta-miR482d, gma-miR1516a-3p, mtr-miR2633, gma-miR4346, gma-miR397b-3p, osa-miR2275c, hvu-miR6214, ptc-miR6459b, bdi-miR9498
CPN20 CHCPN10 CPN21 At5g20720 T1M15.120	10	mtr-miR2622, mtr-miR2622, esi-miR3468-5p, ahy-miR3512, vvi-miR3633a-5p, bdi-miR5069, mtr-miR5206a, bdi-miR7708a-5p, bdi-miR7711-5p.4, ptc-miR7815
At2g44920 T13E15.7	10	ath-miR1888a, mtr-miR5741a, mtr-miR5741b, mtr-miR5741c, mtr-miR5741d, mtr-miR5741e, pde-miR482d, bdi-miR7738-5p, stu-miR8019-5p, ath-miR8174
At2g44920 T13E15.7	10	osa-miR1423-3p, mtr-miR5281b, mtr-miR5281c, mtr-miR5281d, mtr-miR5281e, mtr-miR5281f, ptc-miR7840, stu-miR8042, bra-miR9564-3p, ata-miR166c-5p
MED26B MED26_2 At5g05140 K2A11.1	10	gma-miR1520a, osa-miR5083, osa-miR5159, bra-miR5721, osa-miR5795, hbr-miR2118, hme-bantam, ddi-miR-7131c-3p, lja-miR7528, bdi-miR7765-5p
MED26B MED26_2 At5g05140 K2A11.1	10	zma-miR160d-3p, ath-miR833a-5p, tae-miR1137a, osa-miR2095-5p, gma-miR530b, gma-miR530c, gma-miR530d, gma-miR530e, hvu-miR6205, sbi-miR5568e-5p
FAD7	10	ppt-miR904a, ppt-miR904b, smo-miR1088-3p, osa-miR1425-5p, gma-miR482a-3p, osa-miR1851, zma-miR169o-3p, aly-miR399e-5p, gma-miR5042-5p, vun-miR482
IDD4 At2g02080 F5O4.15	10	ath-miR851-5p, ppt-miR1047-5p, zma-miR2275b-3p, zma-miR2275c-3p, ath-miR4221, mtr-miR5262, gma-miR4387e, ptc-miR6439b, mes-miR2275, sly-miR169e-3p
GAF1 IDD2 At3g50700 T3A5.80	10	ath-miR157c-3p, mtr-miR156h-3p, aly-miR157a-3p, aly-miR157c-3p, ath-miR5661, bra-miR5716, stu-miR6023, hme-miR-282, cme-miR845, sly-miR9471b-5p
DBR	10	ppt-miR902l-3p, osa-miR1846d-3p, aly-miR4238, gma-miR4342, hme-miR-9a, ptc-miR6461, mtr-miR7696a-3p, mtr-miR7696b-3p, mtr-miR7696c-3p, mtr-miR7696d-3p
ICR4 RIP4 At1g78430 F3F9.6	10	ath-miR406, ppt-miR1042-5p, osa-miR2871a-3p, osa-miR2871b, mtr-miR5745b, bdi-miR7711-3p.3, stu-miR1886i-5p, stu-miR8029, ath-miR8168, gma-miR5780b
At5g46170 MCL19.23	10	gma-miR1533, ath-miR2936, aly-miR781-3p, gma-miR5370, hme-miR-316, hme-miR-33, sly-miR167b-5p, tae-miR9657a-3p, tae-miR9673-5p, tae-miR9673-5p
At5g46170 MCL19.23	10	osa-miR156f-3p, osa-miR156h-3p, osa-miR156l-3p, zma-miR156d-3p, zma-miR156f-3p, zma-miR156g-3p, zma-miR156k-3p, ptc-miR473a-5p, ptc-miR473b, bdi-miR5200b-5p
ABC4 At1g60600 F8A5.36	10	ath-miR390b-3p, ath-miR844-3p, smo-miR1093, mtr-miR2664a, aly-miR169c-3p, esi-miR3455-5p, bdi-miR169k-3p, mtr-miR2664b, bdi-miR7752-3p, hvu-miR397b-3p
TYW1 Os03g0775300 LOC_Os03g56390 OSJNBa0070N04.14	10	ppt-miR1076-3p, smo-miR1085-3p, mtr-miR2661, aly-miR164c-3p, aly-miR833-5p, osa-miR5489, ath-miR5647, gma-miR169t, osa-miR5797, ptc-miR7812
At5g52780 F6N7.27	10	ath-miR846-5p, gma-miR1531-3p, aly-miR319b-5p, esi-miR3465-5p, gma-miR5039, gma-miR169n-3p, gra-miR8712, bra-miR9554-5p, bra-miR9557-3p, gma-miR167k
IOS1 At1g51800 F19C24.3	10	osa-miR156c-3p, osa-miR156g-3p, ath-miR833a-5p, mtr-miR2626, esi-miR3457-3p, bdi-miR5178-5p, hbr-miR6175, gma-miR6299, bdi-miR156e-3p, tae-miR1120c-5p
At1g09660/At1g09670 F21M12.6/F21M12.5	10	cre-miR1148.2, vvi-miR477b-3p, gma-miR4413a, osa-miR5147, gma-miR4413b, hme-miR-3286, sbi-miR6225-3p, ghr-miR7485, bdi-miR159b-5p.2, stu-miR172a-5p
OEP61 TPR7 At5g21990 T6G21.100	10	ath-miR856, cre-miR1157-5p, osa-miR2100-3p, gma-miR4401a, gma-miR5368, gma-miR5369, osa-miR5530, ath-miR5647, stu-miR8033-3p, stu-miR8051-5p
CYP707A5 ABA8OX1 Os02g0703600 LOC_Os02g47470 OJ1218_D07.28 OsJ_007800 P0724B10.17	10	ath-miR856, cre-miR1157-5p, osa-miR2100-3p, gma-miR4342, gma-miR4401a, gma-miR5368, gma-miR5369, osa-miR5530, stu-miR8028-3p, stu-miR8051-5p
TCTP	10	ppt-miR1043-3p, ppt-miR1069-3p, aqu-miR-2017-3p, gma-miR1510b-3p, aly-miR822-3p, aly-miR861-3p, gso-miR1510b, gso-miR1510a, osa-miR5338, sbi-miR5564b
TCTP	10	cre-miR1166.1, bdi-miR319b-3p, stu-miR6023, stu-miR5303c, stu-miR5303a, stu-miR5303b, stu-miR5303d, stu-miR5303e, stu-miR5303f, bra-miR6032-3p
TCTP	10	ptc-miR399c, mtr-miR171b, vvi-miR171b, vvi-miR399d, rco-miR399f, cme-miR171h, lja-miR171b, bdi-miR7713-3p, sly-miR9469-5p, ata-miR9674c-3p
APL2 At1g27680 T22C5.13	10	zma-miR166j-5p, osa-miR2104, esi-miR3461-3p, vvi-miR3636-5p, gma-miR4413a, gma-miR4413b, gma-miR5668, mtr-miR5757, mtr-miR2592bp-3p, bdi-miR7711-5p.2
ADF2	10	ppt-miR1064-3p, smo-miR1097, csi-miR172a-5p, gma-miR4998, mtr-miR5298b, mtr-miR5298c, mtr-miR5298d, sly-miR9471b-3p, sly-miR9471a-3p, bra-miR2111-3p
BSL2 Os12g0617900 LOC_Os12g42310	10	mtr-miR2677, peu-miR2912a, peu-miR2912b, aly-miR3449-3p, gma-miR4362, gma-miR4380b, gma-miR862b, sbi-miR5568e-5p, gra-miR3476, gma-miR9762
BSL2 At1g08420 T27G7.10	10	bna-miR397a, bna-miR397b, mtr-miR2647a, mtr-miR2647b, mtr-miR2647c, gma-miR159d, mtr-miR2592bm-5p, mtr-miR2592bn-5p, cca-miR6110-3p, nta-miR397
GDPD2 At5g41080 MEE6.15	10	bna-miR169m, gma-miR4378b, hme-miR-2768, cme-miR169q, cme-miR169s, cme-miR169p, ghr-miR7493, lja-miR7535, stu-miR4376-3p, ata-miR9776-3p
GSVIVT00037159001 LOC100264145	10	osa-miR171i-5p, zma-miR171m-5p, bdi-miR7777-5p.1, stu-miR8034, stu-miR8034, stu-miR4376-3p, sly-miR9478-3p, sly-miR169e-3p, bdi-miR5200a-5p, bdi-miR5200b-5p
GSVIVT00037159001 LOC100264145	10	mtr-miR166b, aqu-miR-2019-5p, sbi-miR166k, mtr-miR2633, aqc-miR166c, gma-miR166h-3p, ath-miR5013, bdi-miR166f, gma-miR166k, gma-miR166u
CYP26-2 At1g74070 F2P9.6	10	ptc-miR475a-5p, ptc-miR475b-5p, ptc-miR475d-5p, cre-miR1166.1, aly-miR169j-3p, aly-miR169k-3p, aly-miR169l-3p, esi-miR3453-3p, bdi-miR169e-3p, ata-miR169i-3p
SAP130A At3g55200 T26I12.80	10	ptc-miR473a-5p, ptc-miR473b, mtr-miR1510b-3p, mtr-miR2088-5p, ghr-miR2950, gma-miR5030, sbi-miR5565d, hme-miR-92b, mdm-miR171o, gra-miR8733
SAP130A At3g55200 T26I12.80	10	sof-miR168b, cre-miR915, ppt-miR2077, mtr-miR5281b, mtr-miR5281c, mtr-miR5281d, mtr-miR5281e, mtr-miR5281f, mtr-miR5561-3p, gra-miR8735
XPO1 HIT2 XPO1A At5g17020 F2K13.170	10	osa-miR166b-5p, zma-miR166a-5p, ppt-miR1037, aly-miR827-5p, bdi-miR166b-5p, sly-miR6024, nta-miR6024, lja-miR7542, tae-miR9653a-3p, ata-miR166d-5p
HACL HPCL OCD At5g17380 T10B6.40	10	ath-miR156g, osa-miR156l-5p, ghr-miR156c, smo-miR156a, aly-miR156g-5p, aly-miR161-3p.1, ahy-miR3511-3p, gma-miR1512b, mtr-miR5558-3p, nta-miR6161c
RPL3 Os12g0167900 LOC_Os12g07010	10	ath-miR156g, osa-miR156l-5p, ghr-miR156c, smo-miR156a, aly-miR156g-5p, aly-miR161-3p.1, ahy-miR3511-3p, gma-miR1512b, mtr-miR5558-3p, nta-miR6161c
At1g30350 T4K22.5	10	zma-miR399b-5p, zma-miR399d-5p, osa-miR1874-5p, zma-miR399i-5p, aly-miR3442-3p, ahy-miR3520-5p, hvu-miR6184, osa-miR7693-3p, tae-miR9657b-5p, bra-miR860-5p
LHCA6 At1g19150 T29M8.2	10	gma-miR390b-5p, gma-miR1516a-3p, zma-miR395l-5p, zma-miR395m-5p, nta-miR390a, gma-miR390d, gma-miR390e, stu-miR390-5p, sly-miR390a-5p, ata-miR395e-5p
RPL35AC At1g74270 F1O17.6	10	ptc-miR478a, ptc-miR478b, ptc-miR478c, ppt-miR1078, pab-miR3695, gma-miR159d, hvu-miR5051, bdi-miR7724a-3p, bdi-miR7724b-3p, bdi-miR7726b-5p
RPL39 EC2E	10	gma-miR160a-3p, ptc-miR160e-3p, ppt-miR1033a, ppt-miR1033b, ppt-miR1033c, ppt-miR1033d, ppt-miR1033e, bdi-miR5055, mtr-miR160f, stu-miR160a-3p
ABCF3 GCN3 At1g64550 F1N19.11	10	mtr-miR1510b-5p, bdi-miR1127, mtr-miR2654, zma-miR397b-3p, aly-miR397b-3p, osa-miR5510, nta-miR6146a, hvu-miR6183, ddi-miR-7101, ptc-miR7838
At3g52300 T25B15.70	10	osa-miR810b.1, mtr-miR2645, aly-miR840-5p, mtr-miR5257, ptc-miR6478, stu-miR7990a, gra-miR8678, gra-miR8726, gra-miR8745, sly-miR166c-5p
At4g24930 F13M23.70	10	ath-miR832-5p, ath-miR847, aly-miR402-3p, aly-miR3436-3p, aly-miR1887, osa-miR5499, osa-miR5525, osa-miR5814, bdi-miR5185m-5p, cre-miR9897-3p
APL2 At1g27680 T22C5.13	10	osa-miR393b-5p, zma-miR393a-5p, cre-miR1148.2, zma-miR393c-5p, ghr-miR393, mdm-miR393a, mdm-miR393b, mdm-miR393c, mes-miR393c, mes-miR393d
WRKY76 OsI_31379	10	aly-miR395e-5p, aly-miR395g-5p, nta-miR6149a, nta-miR6149b, mes-miR2275, lja-miR7521, bra-miR395d-5p, bra-miR395b-5p, bra-miR395c-5p, bra-miR395a-5p
HRD3A EBS5 At1g18260 T10O22.22	10	ppt-miR1063a, ppt-miR1063b, ppt-miR1063c, ppt-miR1063d, ppt-miR1063e, ppt-miR1063f, ppt-miR1063g, ppt-miR1063h, aly-miR172a-5p, ata-miR172c-5p
MTACP2 At5g47630 MNJ7.22	10	ptc-miR171l-3p, ptc-miR171m, ptc-miR171j, gma-miR171b-3p, csi-miR171b, mtr-miR171h, mtr-miR171g, lja-miR171c, bdi-miR7741-5p.2, stu-miR7984d-3p
PEX11D At2g45740 F4I18.28	10	osa-miR1428a-3p, gma-miR1510a-5p, gma-miR4403, csi-miR482a-5p, osa-miR3981-3p, gma-miR5371-5p, osa-miR6247, hme-miR-305, gra-miR8687, tae-miR1120c-5p
CR4 LOC_Os03g43670 Os03g0637800 OSJNBa0066H15.11 OSNPB_030637800	10	ptc-miR169b-3p, ppt-miR1211-3p, mtr-miR2660, aly-miR774a-3p.2, ath-miR5661, bra-miR5721, hvu-miR6186, bdi-miR7782-3p, bdi-miR9484, bra-miR9553-5p
UCH2 At1g65650 F5I14.18	10	gma-miR1520d, mtr-miR2660, osa-miR2866, osa-miR2866, aly-miR860-3p, mtr-miR5224a, hvu-miR6185, gra-miR8645, bra-miR9569-5p, bra-miR161-3p
OFUT16 At1g76270 F15M4.23 T23E18.20	10	ath-miR399c-5p, ppt-miR899, ppt-miR1023a-3p, ppt-miR1023b-3p, peu-miR2912a, peu-miR2912b, aly-miR399c-5p, gma-miR5030, pti-miR5476, cpa-miR8140
FLN2 PFKB1 At1g69200 F23O10.21 F4N2.16	10	osa-miR2100-5p, zma-miR395o-5p, osa-miR2918, ath-miR5648-3p, nta-miR6151a, nta-miR6151b, nta-miR6151c, nta-miR6151d, nta-miR6151e, gma-miR9761
	10	mtr-miR2609a, mtr-miR2609b, osa-miR2871a-3p, osa-miR2871b, ath-miR5025, ssp-miR437b, gma-miR408a-5p, gma-miR408c-5p, ath-miR5595a, ath-miR5995b
SRF8 At4g22130 F1N20.230	10	osa-miR2118i, vvi-miR3631a-5p, vvi-miR3631b-5p, vvi-miR3631c, vvi-miR3631d, mtr-miR5276, hme-miR-92b, sbi-miR6223-5p, stu-miR8001a, hbr-miR9386
RPS17 At1g79850 F19K16.19	10	gma-miR1531-3p, gra-miR8639a, gra-miR8639b, gra-miR8639c, gra-miR8639f, gra-miR8639g, gra-miR8639h, gra-miR8639i, gra-miR8639d, gra-miR8639e
PSRP3 SOVF_058240	10	ath-miR775, ppt-miR1039-5p, smo-miR536, cre-miR1153-3p.1, sbi-miR821b, esi-miR3469-5p, osa-miR5340, osa-miR5498, sbi-miR6222-3p, bdi-miR5174e-3p.2
HPR At1g68010 T23K23.14	10	ath-miR420, zma-miR399a-5p, cre-miR919.1, ppt-miR1027a, ppt-miR1027b, tae-miR1131, cre-miR1156.2, zma-miR393c-3p, bra-miR5723, ptc-miR6462c-5p
HPR At1g68010 T23K23.14	10	pta-miR946a-3p, pta-miR946b, osa-miR1427, aqc-miR477g, aqc-miR477c, hvu-miR6214, hme-miR-133, ptc-miR6421-5p, pde-miR946, bdi-miR9482
HPR At1g68010 T23K23.14	10	zma-miR319a-5p, zma-miR319c-5p, mtr-miR1510a-3p, bdi-miR319a, bdi-miR319b-5p, bra-miR5716, mtr-miR319d-5p, bdi-miR7723a-5p, bdi-miR7724a-3p, bdi-miR7724b-3p
RPS15AA At1g07770 F24B9.12; RPS15AF At5g59850 MMN10.16 MMN10.8	10	ppt-miR408a, osa-miR2096-5p, mtr-miR2680a, mtr-miR2680b, mtr-miR2680c, mtr-miR2680d, mtr-miR2680e, aly-miR157b-3p, osa-miR5072, ata-miR172a-5p
RPS15AA At1g07770 F24B9.12; RPS15AF At5g59850 MMN10.16 MMN10.8	10	ath-miR862-3p, mtr-miR2618a, mtr-miR2618b, aly-miR862-3p, gma-miR4415a-5p, osa-miR812o-3p, gma-miR5030, gma-miR5030, gma-miR4415b-5p, ath-miR5657
RPS15AA At1g07770 F24B9.12; RPS15AF At5g59850 MMN10.16 MMN10.8	10	ath-miR868-3p, ath-miR2112-3p, mtr-miR2596, aly-miR868-3p, aly-miR2112-3p, gma-miR408b-5p, mtr-miR7698-5p, bdi-miR7778-3p, gra-miR7492e, gra-miR7492f
COL15 At1g28050 F13K9.15	10	mtr-miR2639, mtr-miR2676a, mtr-miR2676b, mtr-miR2676c, mtr-miR2676d, mtr-miR2676e, mtr-miR2676f, ptc-miR7834, gra-miR8710a, gra-miR8710b
ELP1 ABO1 ELO2 At5g13680 MSH12.15	10	ptc-miR473b, bdi-miR5171a, mtr-miR5295a, mtr-miR5295b, mtr-miR5295c, mtr-miR5295d, rgl-miR7972, gra-miR8771a, gra-miR8771b, bdi-miR5171b
PSRP1 RPS22 RPS30 SOVF_177810	10	gma-miR1515a, osa-miR1863c, aly-miR397b-3p, vvi-miR3629a-5p, osa-miR5157a-5p, osa-miR5157b-5p, gma-miR1515b, hme-miR-252, stu-miR169f-3p, ata-miR2275c-5p
PSRP1 RPS22 RPS30 SOVF_177810	10	ptc-miR172h-5p, gma-miR394a-3p, sbi-miR5568a, hbr-miR6166, stu-miR172c-5p, gra-miR8750, sly-miR9479-3p, tae-miR9657a-3p, tae-miR9657c-3p, tae-miR9657b-3p
PSRP1 RPS22 RPS30 SOVF_177810	10	ptc-miR477a-5p, ptc-miR477b, ppt-miR477h, cre-miR1173, vvi-miR477a, mtr-miR2620, ath-miR5012, mes-miR477f, mes-miR477g, stu-miR398b-5p
PSRP1 RPS22 RPS30 SOVF_177810	10	ath-miR414, ath-miR414, ath-miR868-3p, cre-miR917, aly-miR771-3p, gma-miR5774a, gma-miR5774b, hme-miR-252, bdi-miR7725b-5p.1, gra-miR166c
ILI5 BHLH170 PGL2 OsI_08935	10	zma-miR2118e, aly-miR3444a-3p, esi-miR3454e-5p, vvi-miR477b-3p, mtr-miR5287b, ptc-miR6427-3p, gra-miR8766, tae-miR9657a-3p, tae-miR9657c-3p, tae-miR9657b-3p
WAT1 At1g75500 F10A5.28 F1B16.19	10	ath-miR156a-3p, gma-miR1530, osa-miR1861g, aly-miR156a-3p, aly-miR4230, csi-miR482a-5p, nta-miR6153, bdi-miR156h-3p, bra-miR9565-5p, bra-miR156f-3p
UBC22 At5g05080 MUG13.6	10	ppt-miR1075, osa-miR1866-5p, osa-miR5081, bdi-miR5163a-3p, ath-miR5637, ath-miR5640, gma-miR5668, ptc-miR6460, ghr-miR160, bdi-miR7776-3p.1
NDPK2	10	osa-miR1866-5p, ath-miR1888a, osa-miR5081, osa-miR5144-5p, ath-miR5637, ath-miR5640, gma-miR5668, ghr-miR160, bdi-miR7776-3p.1, gra-miR8682
QKY At1g74720 F1M20.40 F25A4.30	10	cre-miR1152, mtr-miR2603, zma-miR395k-5p, aly-miR773b-5p, aly-miR4232, mtr-miR5272f, nta-miR6154a, nta-miR6154b, bdi-miR7780-3p, rgl-miR7805-5p
PP2AB2 At1g17720 F11A6.6	10	zma-miR171k-5p, zma-miR171h-5p, ath-miR869.1, ppt-miR1071-5p, aly-miR823-5p, bdi-miR5064, bdi-miR7764-5p, ata-miR171a-5p, ata-miR9674c-5p, ata-miR9674b-3p
CPK4 CDPK4	10	hme-miR-2788-5p, osa-miR5488, gra-miR7492g, gra-miR7492h, gra-miR7492i, gra-miR7492j, gra-miR7492k, gra-miR7494e, gra-miR7494f, gra-miR8755
PRMT6.2 Os10g0489100 LOC_Os10g34740 B1288B10.2 OsJ_030708	10	esi-miR3465-5p, hme-miR-2788-5p, osa-miR5488, gra-miR7492g, gra-miR7492h, gra-miR7492i, gra-miR7492j, gra-miR7492k, gra-miR7494e, gra-miR7494f
LPPD SPP1 At3g58490 F14P22.80	10	osa-miR529a, sbi-miR529, mtr-miR2647a, mtr-miR2647b, mtr-miR2647c, aly-miR3441-5p.1, nta-miR397, bdi-miR7742-3p, rgl-miR7805-5p, stu-miR8045
RPS17 HCF60	10	aly-miR3440-3p, osa-miR5503, ath-miR5663-3p, hbr-miR2118, hbr-miR6167, gra-miR8778, sly-miR9475-3p, tae-miR9772, ata-miR9772a-5p, ata-miR9772b-5p
RPS17 HCF60	9	bna-miR1140, bdi-miR5178-3p, bra-miR1140, ptc-miR482d-3p, bdi-miR7729a-5p, bdi-miR7729b-5p, bdi-miR7763-3p, tae-miR9662a-3p, tae-miR9662b-3p
ARPC1A At2g30910 F7F1.12	9	zma-miR164b-3p, ath-miR831-5p, ath-miR861-5p, ppt-miR1061-3p, aly-miR774a-5p.1, csi-miR3947-5p, csi-miR3947-5p, sly-miR9471a-5p, bra-miR9555b-5p
LARP1B At5g66100 K2A18.18	9	ppt-miR533a-3p, ppt-miR533b-3p, ppt-miR533c, ppt-miR533d, ppt-miR533e, pvu-miR1514a, vvi-miR3635-3p, osa-miR5492, bdi-miR7745-5p
RRP44A EMB2763 At2g17510	9	zma-miR159b-5p, osa-miR531b, zma-miR159j-5p, zma-miR159k-5p, ath-miR3932b-5p, gma-miR5041-5p, mtr-miR5249, hme-miR-2797, gra-miR8737
NUDT26 NUDX26 At3g10620 F13M14.9 F18K10.24	9	mtr-miR2625, aly-miR4222, vvi-miR3637-5p, mtr-miR5231, osa-miR5495, rgl-miR5578, mtr-miR7700-5p, bdi-miR5181c-5p, gra-miR8674a
NUDT26 NUDX26 At3g10620 F13M14.9 F18K10.24	9	ath-miR858a, aly-miR858-5p, mtr-miR5222, mtr-miR2590h, mtr-miR2590i, mtr-miR2590j, ath-miR858b, mdm-miR858, cme-miR858
GT43A Os05g0123100 LOC_Os05g03174 OJ1729_E02.10 P0008A07.2	9	cre-miR908.2, osa-miR1875, vvi-miR3630-5p, hbr-miR6171, bdi-miR7708b-5p, ptc-miR7831, gra-miR7502b, gra-miR7502c, sly-miR9476-5p
At1g16860 F6I1.14	9	ptc-miR171g-5p, ptc-miR171h-5p, osa-miR812a, osa-miR812b, osa-miR812c, osa-miR812d, osa-miR812e, osa-miR1863b, stu-miR4376-5p
GT17 At1g68470 T26J14.4	9	ptc-miR167f-3p, ptc-miR167g-3p, ptc-miR167h-3p, ahy-miR167-3p, gma-miR5036, lja-miR7520, bdi-miR5185l-5p, rgl-miR7797b, sly-miR9476-5p
CTL1 ARM ELP1 ERH2 HOT2 POM1 At1g05850 T20M3.12	9	ppt-miR1024a, ppt-miR1024b, osa-miR2090, ath-miR3932b-5p, gma-miR5041-5p, bdi-miR166g-5p, mtr-miR5557-3p, stu-miR6023, sbi-miR5568c-5p
CTL2 At3g16920 K14A17.4	9	zma-miR395b-5p, zma-miR395i-5p, ghr-miR2949a-5p, ghr-miR2949b, ghr-miR2949c, aly-miR4236, nta-miR6148b, bdi-miR395o-5p, cre-miR9897-3p
EMB2750 At3g06430 F24P17.10	9	ppt-miR1211-3p, osa-miR1439, osa-miR1861b, osa-miR1861f, osa-miR1861i, osa-miR1861l, gma-miR4358, mtr-miR397-3p, bdi-miR7756-5p
UXS2 AUD1 D18 At3g62830 F26K9_260	9	ath-miR169a-3p, zma-miR169a-3p, zma-miR169b-3p, zma-miR169r-3p, aly-miR169a-3p, bdi-miR169c-3p, stu-miR8049-3p, gra-miR8686, ata-miR169d-3p
UXS2 AUD1 D18 At3g62830 F26K9_260	9	cre-miR911, osa-miR2093-3p, esi-miR3459-3p, vvi-miR3632-3p, osa-miR5528, hme-miR-2c, stu-miR7997a, stu-miR7997b, gra-miR7486d
	9	osa-miR816, ppt-miR1057, osa-miR3979-3p, osa-miR5489, ddi-miR-7095-5p, ddi-miR-7131a-3p, ddi-miR-7131d, lja-miR7534, bdi-miR5174d-3p
AN DOQ At1g01510 F22L4.6	9	gma-miR319d, mtr-miR5218, mtr-miR5270a, mtr-miR5270b, ghr-miR7504b, ath-miR8170-5p, gra-miR7504c, gra-miR7504d, gma-miR319o
KAKU4 At4g31430 F3L17.8 F8F16	9	osa-miR529a, sly-miR1916, sbi-miR529, bdi-miR5066, mtr-miR2592bl-3p, bdi-miR7741-5p.1, gra-miR8721a, gra-miR8721b, gra-miR8772
OsI_27415	9	osa-miR529a, sly-miR1916, sbi-miR529, bdi-miR5066, mtr-miR2592bl-3p, bdi-miR7741-5p.1, gra-miR8721a, gra-miR8721b, gra-miR8772
Os06g0143900 LOC_Os06g05180 OSJNBa0007O20.8-1	9	osa-miR167c-3p, zma-miR167c-3p, osa-miR438, vvi-miR3636-5p, stu-miR7997a, stu-miR7997b, gra-miR8666, gra-miR8681, ata-miR167e-3p
Os06g0143900 LOC_Os06g05180 OSJNBa0007O20.8-1	9	ptc-miR473a-3p, ath-miR844-3p, mtr-miR2607, mtr-miR2632b, mtr-miR2632c, ptc-miR6450a, gra-miR8709a, gra-miR8709a, bra-miR9563a-3p
VATG VMA10	9	ath-miR852, aly-miR852-3p, aly-miR3448-3p, aly-miR3448-3p, mtr-miR5232, gma-miR4387e, bdi-miR7785-3p, bdi-miR7785-3p, bra-miR9562-5p
PLDDELTA At4g35790 F4B14.60	9	osa-miR814a, osa-miR814b, osa-miR814c, ppt-miR1028b-3p, mtr-miR5758, hbr-miR6172, stu-miR8033-3p, gra-miR8668, gra-miR8723a
At3g13860 MCP4.9	9	ppt-miR1073-5p, pta-miR1309, mtr-miR2667a, aly-miR4222, osa-miR5500, osa-miR5796, ath-miR5997, mtr-miR2667b, ath-miR8179
OsI_03083	9	ppt-miR534b, cre-miR909.2, smo-miR1107, mtr-miR2638a, mtr-miR2638b, osa-miR5489, stu-miR7992-5p, bdi-miR9492, tae-miR9776
	9	osa-miR156c-3p, osa-miR156g-3p, zma-miR156a-3p, ppt-miR1029, gma-miR1534, sbi-miR6228-5p, bdi-miR156e-3p, stu-miR156f-3p, ata-miR156b-3p
	9	ath-miR862-3p, cre-miR1151b-5p, osa-miR1429-3p, esi-miR3454g-3p, esi-miR3454d-3p, mtr-miR5204, cpa-miR8140, gra-miR8672, tae-miR9673-5p
	9	vvi-miR3640-3p, stu-miR482e-3p, sly-miR482c, ptc-miR6456, ghr-miR7504b, gra-miR7504c, gra-miR7504d, gra-miR7504e, gra-miR7504f
	9	osa-miR1846d-5p, osa-miR5504, ath-miR5645a, ath-miR5645b, ath-miR5645d, ath-miR5645f, ath-miR5645e, mtr-miR7696c-5p, bra-miR9562-5p
FAO1	9	ath-miR782, vvi-miR482, osa-miR1861h, osa-miR1861j, pab-miR482c, csi-miR482c, pde-miR482a, esi-miR8623b, bra-miR9563a-5p
FAO2	9	ath-miR395b, ath-miR395c, ath-miR395f, aly-miR395b-3p, aly-miR395f-3p, aly-miR395h-3p, bna-miR395d, bna-miR395e, bna-miR395f
EXPA1 EXP1 At1g69530 F10D13_18	9	cre-miR915, ppt-miR1034, osa-miR2097-5p, stu-miR7991a, stu-miR7991b, stu-miR7991c, stu-miR5303g, stu-miR5303i, gra-miR530b
VQ4 MVQ1 At1g28280 F3H9.7	9	cre-miR1159.2, aly-miR169m-3p, pab-miR3697, hme-miR-2a, hme-miR-2b, ptc-miR6476a, ptc-miR6476b, ptc-miR6476c, stu-miR399g-3p
VQ4 MVQ1 At1g28280 F3H9.7	9	osa-miR810b.1, mtr-miR2654, mtr-miR5240, ptc-miR6476a, bdi-miR7730-3p, ptc-miR6476b, ptc-miR6476c, ata-miR9863a-3p, ata-miR9863b-3p
TOM2AH3 At2g20740 F5H14.29	9	osa-miR438, tae-miR1124, aly-miR3433-3p, ahy-miR160-3p, osa-miR5150-5p, gma-miR5676, cca-miR6118-3p, stu-miR7122-3p, ath-miR8176
TOM2AH3 At2g20740 F5H14.29	9	ath-miR407, ppt-miR1218, esi-miR3456-5p, osa-miR5829, hme-miR-2765, sbi-miR6222-3p, mtr-miR319c-5p, bdi-miR7748b-3p, ath-miR8174
ERD2B ERD2.2 At3g25040	9	ptc-miR394a-3p, ptc-miR394b-3p, aly-miR3435-5p, bra-miR5722, ptc-miR6457b, pde-miR952a, pde-miR952b, pde-miR952c, stu-miR7122-3p
ERD2B ERD2.2 At3g25040	9	bdi-miR5182, mtr-miR2670f, mtr-miR2670g, ath-miR5997, hvu-miR5048b, hvu-miR6199, hvu-miR6209, ptc-miR3627a, gra-miR7484g
ERD2A At1g29330 F15D2.26 F28N24.1	9	ath-miR172b-5p, ath-miR172e-5p, mtr-miR171a, ppt-miR1023b-3p, aly-miR172e-5p, gma-miR4413a, gma-miR171d, nta-miR6025c, sly-miR482d-5p
XAT3 Os03g0567600 LOC_Os03g37010 OsJ_11476 OSJNBa0026A15.4	9	ath-miR162a-5p, ath-miR162b-5p, ptc-miR476b, osa-miR395v, csi-miR162-5p, csi-miR393, hvu-miR6214, sbi-miR5568f-5p, gra-miR8729
RANBPM At1g35470 F12A4.1	9	ath-miR824-5p, bol-miR824, bra-miR824, bna-miR824, mtr-miR2595, aly-miR824-5p, osa-miR5529, osa-miR5816, rgl-miR7798
WRKY65 At1g29280 F28N24.4	9	zma-miR164a-3p, mtr-miR5277, hvu-miR5049f, mdm-miR3627a, mdm-miR3627b, mdm-miR3627c, ptc-miR3627b, stu-miR8049-5p, stu-miR3627-5p
UGT88F3	9	zma-miR159c-5p, zma-miR159d-5p, ppt-miR319d-5p.1, osa-miR2120, zma-miR159g-5p, zma-miR159h-5p, zma-miR159i-5p, bdi-miR159a-5p, stu-miR319a-5p
BZIP19 At4g35040 M4E13.100	9	cre-miR1151b-3p, ptc-miR1446a, ptc-miR1446b, ptc-miR1446c, ptc-miR1446d, ptc-miR1446e, mes-miR1446, ath-miR8175, gra-miR8692
At5g63260 MDC12.23	9	osa-miR156j-3p, aqu-miR-2015-5p, ppt-miR2081, aly-miR398c-3p, aly-miR4221, gma-miR4387b, gma-miR319n, bdi-miR7737-3p, bdi-miR7775-3p
MYB306	9	osa-miR169f.2, osa-miR1428e-3p, mtr-miR5235a, mtr-miR5235b, hme-miR-278, bdi-miR531, gma-miR9743, tae-miR531, tae-miR9775
MES11 At3g29770 T26G12.12; At1gXXXXX F13E17.2	9	osa-miR168a-3p, zma-miR168a-3p, zma-miR168b-3p, zma-miR169p-3p, ahy-miR160-3p, hvu-miR168-3p, tae-miR169, bdi-miR168-3p, ata-miR168-3p
AUG1 At2g41350 F13H10.10	9	zma-miR395a-5p, mtr-miR396c, mtr-miR5206b, nta-miR5303a, nta-miR5303b, bdi-miR7727-5p, stu-miR8037, ata-miR160a-3p, ata-miR395c-5p
PPD5 At5g11450 F15N18.40	9	gma-miR4997, mdm-miR7121a, mdm-miR7121b, mdm-miR7121c, mdm-miR7121d, mdm-miR7121e, mdm-miR7121f, mdm-miR7121g, mdm-miR7121h
BHLH66 EN95 At2g24260 F27D4.17	9	ppt-miR534a, ppt-miR534b, ptc-miR6425a-5p, ptc-miR6425b-5p, ptc-miR6425c-5p, ptc-miR6425d-5p, ptc-miR6425e, bdi-miR7741-5p.1, bra-miR9552a-5p
RECA At1g79050 YUP8H12R.33 YUP8H12R_18	9	smo-miR1090, osa-miR1871, ath-miR5028, rgl-miR5574, ddi-miR-7104, bdi-miR7753-5p, stu-miR7997a, stu-miR7997b, tae-miR9656-3p
At1g67720 F12A21.30	9	ath-miR164c-3p, zma-miR164g-3p, aly-miR164c-3p, bdi-miR7768a-5p, bdi-miR7768b-5p, stu-miR8012, bra-miR164b-3p, bra-miR164d-3p, bra-miR164c-3p
RPL29 At5g65220 MQN23.16	9	pta-miR949, ppt-miR1077-3p, cre-miR1162-3p, mtr-miR2645, mtr-miR5228, osa-miR5530, osa-miR5538, pde-miR949b, bdi-miR7743-3p
ZFP1 Os01g0667700 LOC_Os01g47740 OsJ_02947 OSJNBb0063G05.28-1 OSJNBb0063G05.28-2	9	osa-miR529a, ppt-miR1038-3p, cre-miR1170.1, sbi-miR529, ahy-miR3517, aly-miR4223, aly-miR4242, osa-miR5144-5p, ptc-miR6478
CSP1 CSDP1 At4g36020 T19K4.150	9	ath-miR447a.2-3p, cre-miR1154-3p, aly-miR398b-5p, ath-miR5013, mtr-miR5556-5p, bdi-miR7742-5p, cpa-miR166e, gra-miR8693, bra-miR9569-3p
CSP1 CSDP1 At4g36020 T19K4.150	9	zma-miR172d-5p, zma-miR172b-5p, aly-miR172b-5p, sbi-miR6217a-3p, sbi-miR6217b-3p, sbi-miR6221-3p, stu-miR172b-5p, sly-miR9474-3p, tae-miR5062-5p
RPL2	9	ppt-miR1039-3p, smo-miR1102, osa-miR2101-3p, osa-miR2869, gma-miR4350, gma-miR4367, bdi-miR7753-3p, gra-miR8640, tae-miR9667-5p
At2g39750 T5I7.5	9	osa-miR1436, osa-miR2919, osa-miR2926, gma-miR4380a, hvu-miR1436, osa-miR5074, osa-miR5083, bdi-miR5174e-3p.2, gra-miR827b
GSVIVT00037159001 LOC100264145	9	osa-miR1442, bdi-miR169e-3p, gma-miR5679, nta-miR6145b, bdi-miR7709-3p, bdi-miR7717a-5p, bdi-miR7756-3p, ata-miR169i-3p, ata-miR398g-5p
HSL1 At1g28440 F3M18.12	9	ppt-miR1222d, smo-miR171c, ath-miR4221, mtr-miR5037a, mtr-miR5037b, mtr-miR5037c, hvu-miR6210, sbi-miR6231-5p, ptc-miR7834
CYP97C1 LUT1 At3g53130 T4D2.60	9	bra-miR172b-5p, zma-miR159e-3p, esi-miR3465-3p, gma-miR5043, bdi-miR5199, gma-miR4413b, bna-miR6031, bdi-miR7757-5p.2, gra-miR8768
APUM5 At3g20250 MAL21.29	9	ath-miR391-5p, ath-miR406, tae-miR399, osa-miR2104, aly-miR391-5p, cca-miR6108e-3p, osa-miR6250, cme-miR399f, bra-miR391-5p
WNK5 At3g51630 T18N14.10	9	zma-miR319b-5p, zma-miR319d-5p, vvi-miR171h, mtr-miR2089-5p, osa-miR2928, nta-miR6020a-3p, hme-miR-13b, bdi-miR9499, gma-miR9762
WNK5 At3g51630 T18N14.10	9	ath-miR172d-5p, aly-miR172d-5p, bdi-miR5066, ath-miR5595a, ath-miR5995b, nta-miR6145b, nta-miR6161d, bdi-miR7711-5p.3, bdi-miR7741-3p.1
WNK5 At3g51630 T18N14.10	9	ppt-miR533a-3p, ppt-miR533b-5p, ppt-miR533c, ppt-miR533d, esi-miR3454e-5p, gma-miR5042-3p, osa-miR5484, osa-miR5484, stu-miR8023
WNK5 At3g51630 T18N14.10	9	ppt-miR1222d, pab-miR3699, gma-miR4996, bdi-miR5057, bdi-miR5058, ptc-miR7825, stu-miR1886g-5p, cpa-miR398, bra-miR398-5p
KCS1 EL1 At1g01120 T25K16.11	9	ppt-miR1222d, pab-miR3699, gma-miR4996, bdi-miR5057, bdi-miR5058, ptc-miR7825, stu-miR1886g-5p, cpa-miR398, bra-miR398-5p
CCB1 At3g26710 MLJ15.10	9	gma-miR530a, gma-miR169i-5p, osa-miR5513, gma-miR530b, gma-miR530c, gma-miR530d, gma-miR530e, ghr-miR7484a, ghr-miR7484b
CCB1 At3g26710 MLJ15.10	9	osa-miR1858a, osa-miR1858b, mtr-miR2664a, aly-miR856-5p, vvi-miR3624-3p, mtr-miR5291a, mtr-miR5291b, mtr-miR5291c, mtr-miR2664b
	9	ptc-miR394a-3p, ptc-miR394b-3p, ath-miR2938, esi-miR3460-3p, gma-miR4368b, bdi-miR172a-5p, mtr-miR5744, hme-miR-6302-2-5p, ata-miR172b-5p
RTNLB11 At3g19460 MLD14.20	9	osa-miR169f.2, osa-miR169f.2, ath-miR420, aly-miR3435-3p, gma-miR319d, gma-miR319i, ptc-miR6452, gma-miR319o, ata-miR5084-5p
XTH30 XTR4 At1g32170 F3C3.5	9	ath-miR397b, ppt-miR1036-5p, gma-miR4401b, hme-miR-79, stu-miR5303j, stu-miR5303g, stu-miR5303i, tae-miR1847-5p, ata-miR2275c-5p
TIC32 HP32 IEP32	9	mtr-miR2635, aly-miR173a-3p, aly-miR859-3p, ath-miR5595a, ath-miR5995b, bdi-miR7711-5p.1, stu-miR4376-3p, aly-miR173b-3p, sly-miR9474-5p
PEPKR2 At1g12680 T12C24.32	9	zma-miR159b-5p, osa-miR2098-3p, mtr-miR2604, zma-miR159j-5p, zma-miR159k-5p, esi-miR3468-5p, bdi-miR1878-3p, bdi-miR5174a, rgl-miR5578
ATJ20 C20 J20 At4g13830 F18A5.220	9	cre-miR1157-3p, esi-miR3460-3p, ptc-miR6459a-3p, sbi-miR6231-3p, lja-miR7516-3p, bdi-miR7755-3p, tae-miR397-5p, ata-miR166b-5p, cre-miR9897-5p
	9	vvi-miR172b, aly-miR163-3p.2, cca-miR6109, mtr-miR7699-5p, bdi-miR7733-3p, bdi-miR7748b-3p, bdi-miR7767-3p, gra-miR8716, bra-miR9566-5p
CNGC1 At5g53130 MFH8.6	9	ath-miR167c-3p, ptc-miR481d, gma-miR1517, gma-miR1532, ath-miR1887, osa-miR2870, hme-miR-2788-3p, mtr-miR5290, gma-miR5369
At2g23790 F27L4.3	9	zma-miR528a-5p, zma-miR528b-5p, sbi-miR528, aly-miR853-5p, bdi-miR528-5p, ssp-miR528, gma-miR169l-3p, gma-miR5783, ata-miR528-5p
At2g23790 F27L4.3	9	ath-miR837-3p, aly-miR856-5p, aly-miR837-3p, hme-miR-6305-5p, ptc-miR6435, ath-miR8170-5p, gra-miR7502d, gra-miR8783, ata-miR5181-3p
LEA5	9	smo-miR1099, aly-miR4229, hbr-miR6172, osa-miR6254, ptc-miR6431, ddi-miR-7099, bdi-miR7723a-5p, gra-miR8764, bdi-miR9491
LEA41 DI21 At4g15910 dl3995w FCAALL.235	9	cre-miR909.2, osa-miR5530, hbr-miR6169, ddi-miR-7095-5p, gra-miR8743c, gra-miR8743d, gra-miR8743e, gra-miR8743a, tae-miR9668-5p
COL16 At1g25440 F2J7.10	9	osa-miR168a-3p, zma-miR168a-3p, gma-miR1515a, hvu-miR168-3p, bdi-miR168-3p, gma-miR1515b, hme-miR-13b, ghr-miR7485, ata-miR168-3p
NAA25 TCU2 At5g58450	9	ppt-miR1222d, mtr-miR2594, mtr-miR2628, mtr-miR2673a, mtr-miR2673b, esi-miR3466-5p, ath-miR5629, stu-miR8049-3p, sly-miR9471a-5p
PHOT1 JK224 NPH1 RPT1 At3g45780 T6D9_110	9	ppt-miR1028b-3p, osa-miR1423-3p, mtr-miR5281b, mtr-miR5281c, mtr-miR5281d, mtr-miR5281e, mtr-miR5281f, stu-miR8042, ata-miR166c-5p
PCMP-H89 At5g13230 T31B5_50	9	ppt-miR1028b-3p, osa-miR1423-3p, mtr-miR5281b, mtr-miR5281c, mtr-miR5281d, mtr-miR5281e, mtr-miR5281f, stu-miR8042, ata-miR166c-5p
At4g37920 F20D10.40	9	tae-miR1118, gma-miR4367, bdi-miR5201-5p, ath-miR5999, nta-miR6025a, stu-miR6025, bdi-miR7729a-3p, bdi-miR7729b-3p, gma-miR9755
PTST2 At1g27070 T7N9.13	9	ath-miR854a, ath-miR854b, ath-miR854c, ath-miR854d, ath-miR854e, sly-miR6023, ptc-miR6421-3p, ptc-miR7837, ptc-miR7836
RPL7D At3g13580 K20M4.2	9	aly-miR162a-5p, aly-miR162b-5p, mtr-miR5554a-3p, mtr-miR5554b-3p, mtr-miR5554c-3p, rgl-miR7803b-3p, stu-miR162a-5p, stu-miR162b-5p, bra-miR162-5p
RPL7B At2g01250 F10A8.13	9	aly-miR162a-5p, aly-miR162b-5p, mtr-miR5554a-3p, mtr-miR5554b-3p, mtr-miR5554c-3p, rgl-miR7803b-3p, stu-miR162a-5p, stu-miR162b-5p, bra-miR162-5p
FDC2 At1g32550 T9G5.4	9	ath-miR849, smo-miR1112-3p, vvi-miR3631a-3p, gma-miR4393a, csi-miR3946, mtr-miR5240, osa-miR2873c, bdi-miR7717c-3p, gra-miR8736
RAB11D	9	ath-miR835-5p, mtr-miR2591, zma-miR482-3p, aly-miR835-5p, aly-miR3436-3p, bdi-miR7711-5p.1, bdi-miR7757-3p.1, gma-miR5780c, gma-miR9742
RAB11D	9	ptc-miR160h, ppt-miR160b, ppt-miR160c, ppt-miR160d, ppt-miR160h, ppt-miR160i, bdi-miR5181a-5p, osa-miR5828, nta-miR160d
SD25 At4g32300 F10M6.60 F8B4.10	9	osa-miR2102-3p, gma-miR1520o, gma-miR4397-5p, mtr-miR5237, ath-miR5654-3p, sbi-miR5568f-5p, bdi-miR7760-3p, bdi-miR7766-3p, sly-miR9478-5p
	9	osa-miR1866-3p, osa-miR1846c-3p, zma-miR395k-5p, aly-miR395e-5p, bdi-miR395j-5p, ath-miR833b, osa-miR6249a, osa-miR6249b, bra-miR408-3p
XRN3 At1g75660 F10A5.15	9	osa-miR395v, cre-miR912, ppt-miR1037, ppt-miR1070, mtr-miR2598, aly-miR823-3p, bra-miR5713, rgl-miR7810, gra-miR8672
XRN3 At1g75660 F10A5.15	9	osa-miR169p, osa-miR444a-3p.2, osa-miR444d.2, osa-miR444e, aly-miR834-5p, aly-miR774b-3p, esi-miR3459-3p, sbi-miR5567, bdi-miR444b
Os09g0520700 LOC_Os09g34910 P0669G04.13	9	gma-miR160a-3p, ptc-miR396f, smo-miR1083, mtr-miR2089-5p, mtr-miR2089-5p, mdm-miR396f, mdm-miR396g, cme-miR396e, stu-miR160a-3p
Os09g0520700 LOC_Os09g34910 P0669G04.13	9	pta-miR952a, pta-miR952a, hme-miR-981, ptc-miR6451, pde-miR952a, pde-miR952a, pde-miR952b, pde-miR952b, gma-miR9755
EIF5	9	ghr-miR2950, ath-miR4239, vvi-miR2950-5p, gma-miR5041-5p, mtr-miR5290, osa-miR5503, hme-miR-11, mes-miR2950, gra-miR8709c
EIF5	9	cre-miR919.2, mtr-miR2658, peu-miR2913, zma-miR395f-5p, osa-miR5513, osa-miR5522, gma-miR5669, gma-miR5774a, gma-miR5774b
EIF5	9	osa-miR1850.2, gma-miR4340, ath-miR5025, hvu-miR6204, bdi-miR7725b-5p.2, stu-miR7985, stu-miR1886i-3p, gra-miR8655, gma-miR9737
IDH1 At4g35260 F23E12.180	9	ath-miR167c-5p, aqc-miR167, aly-miR167c-5p, tae-miR167b, sbi-miR5385, hvu-miR6213, ptc-miR6427-5p, cme-miR167e, mtr-miR7699-5p
HTH ACE At1g72970 F3N23.17	9	gma-miR1528, gma-miR4351, mdm-miR7122a, mdm-miR7122b, ghr-miR7488, ghr-miR7510b, lja-miR7522, bdi-miR7741-3p.2, tae-miR9654a-3p
	9	osa-miR156c-3p, osa-miR156g-3p, ath-miR833a-5p, esi-miR3457-3p, bdi-miR5178-5p, hbr-miR6175, gma-miR6299, bdi-miR156e-3p, tae-miR1120c-5p
At3g08860 T16O11.21	9	osa-miR156c-3p, osa-miR156g-3p, aqu-miR-2016-3p, zma-miR159h-3p, zma-miR159i-3p, ghr-miR2948-5p, sly-miR5300, bdi-miR156e-3p, tae-miR9666a-3p
At3g08860 T16O11.21	9	ath-miR398a-5p, cre-miR1152, osa-miR1431, mtr-miR2596, bdi-miR166g-5p, mtr-miR2590g, mtr-miR5756, bdi-miR7781-5p, cpa-miR5211
IDD4 At2g02080 F5O4.15	9	mtr-miR156h-3p, ppt-miR1046-3p, ptc-miR827, pvu-miR482-5p, aly-miR3445-5p.1, gma-miR4372b, nta-miR827, mdm-miR827, stu-miR827-3p
HAT5 ATHB-1 At3g01470 F4P13.2	9	ath-miR399c-5p, ath-miR830-5p, ppt-miR902k-3p, smo-miR1084, mtr-miR2608, aly-miR399b-5p, aly-miR399c-5p, ahy-miR3509-5p, bra-miR390-3p
RPL15	9	osa-miR166k-5p, ppt-miR902h-3p, mtr-miR2591, mtr-miR2634, aly-miR319b-5p, vvi-miR3633b-5p, bdi-miR7732-5p, stu-miR319a-5p, bdi-miR9497
IAA31 Os12g0601400 LOC_Os12g40900 OsJ_36766	9	ath-miR419, ppt-miR1220a, ppt-miR1220b, vvi-miR395n, osa-miR5144-3p, gma-miR5770a, gma-miR5770b, mdm-miR7128, bdi-miR7738-5p
TIM17-2 At2g37410 F3G5.20	9	osa-miR2118h, osa-miR2118k, zma-miR2118a, osa-miR2876-3p, zma-miR159e-5p, gma-miR4416a, gma-miR172k, ptc-miR6455, gra-miR8667
TIM17-2 At2g37410 F3G5.20	9	osa-miR396e-3p, zma-miR169c-3p, osa-miR1872, mtr-miR2613, peu-miR2916, osa-miR2926, mtr-miR5562-3p, stu-miR7989, ata-miR169f-3p
RPS2 At4g26090 F20B18.200	9	ath-miR5017-3p, mtr-miR5237, bra-miR5721, nta-miR6162, lja-miR1507a, lja-miR1507b, ptc-miR7815, gra-miR482, gra-miR8675c
FRS11 At1g10240 F14N23.12	9	ptc-miR393a-3p, aly-miR3444a-5p, gma-miR4416c, hme-miR-263b, ptc-miR6423, osa-miR7695-5p, gra-miR7486d, gra-miR8702, gma-miR9725
ERF053 At2g20880 F5H14.15	9	tae-miR1122a, mtr-miR1510b-3p, mtr-miR2651, far-miR1122, pti-miR5472, bna-miR860, bdi-miR7723b-5p, gra-miR8668, bra-miR860-3p
FPS1	9	pta-miR947, ppt-miR1035, osa-miR1853-3p, mtr-miR5217, mtr-miR5254, mtr-miR2590g, pde-miR947, bdi-miR7752-5p, sly-miR5302b-3p
ALDH2C4 REF1 At3g24503 MOB24.3	9	mtr-miR2598, aly-miR3438-3p, gma-miR4413a, gma-miR5038a, gma-miR5038b, gma-miR4413b, lja-miR7530, bdi-miR159b-5p.2, stu-miR5303e
At1g01540 F22L4.8	9	osa-miR810b.2, esi-miR3458-3p, aly-miR4241, aly-miR4250, mtr-miR5218, osa-miR5492, ghr-miR7502, rgl-miR7800, bdi-miR9496
PMM H0124B04.12 OsI_017323	9	ppt-miR529g, gma-miR1509a, ath-miR2936, gso-miR1509a, csi-miR3954, pti-miR5476, stu-miR169f-3p, sly-miR169e-3p, bra-miR9557-5p
PMM H0124B04.12 OsI_017323	9	ath-miR400, cre-miR1142, zma-miR395k-5p, aly-miR400-5p, mtr-miR2586b, mtr-miR5234, ath-miR5649a, ath-miR5649b, bra-miR400-5p
PMM H0124B04.12 OsI_017323	9	zma-miR164a-3p, ppt-miR902l-3p, mtr-miR2612, ath-miR5654-5p, nta-miR6025b, cca-miR6106-3p, osa-miR6254, stu-miR8007a-5p, bra-miR9566-3p
	9	ath-miR156c-3p, zma-miR159e-5p, osa-miR2927, aly-miR156c-3p, mtr-miR5757, nta-miR6145f, bdi-miR156f-3p, bra-miR156c-3p, bra-miR156g-3p
ARF7 Os02g0557200 LOC_Os02g35140 OsJ_07141 OSJNBb0038F20.6	9	mtr-miR2088-3p, aly-miR163-5p.1, gma-miR4349, ath-miR5654-5p, ssl-miR1078, osa-miR6254, bdi-miR7777-5p.2, ath-miR8178, sly-miR9477-5p
ARF1 At1g59750 F23H11.7	9	gma-miR2108b, mtr-miR2611, aly-miR862-5p, pab-miR3705, stu-miR399i-5p, gra-miR166c, gra-miR8769, bol-miR9409, bdi-miR9491
CYS3 FL3-27 At2g40880 T20B5.8	9	ath-miR824-3p, zma-miR2275a-3p, zma-miR2275d-3p, zma-miR169m-3p, aly-miR824-3p, bdi-miR5178-3p, osa-miR2275d, osa-miR5531, ata-miR2275b-3p
Os01g0803200 LOC_Os01g58890 P0003D09.48 P0034E02.11	9	zma-miR162-3p, ptc-miR827, gma-miR162a, gma-miR1520f-5p, ddi-miR-7095-5p, mdm-miR827, lja-miR7541, bdi-miR7778-3p, ptc-miR7817b
AXR4 At1g54990 F14C21.51 T24C10.10	9	ptc-miR167h-5p, cre-miR1160.3, gma-miR1510a-3p, aly-miR4247, bra-miR5715, bna-miR6035, stu-miR8034, gma-miR167k, ata-miR9776-3p
GT-1 At1g13450 T6J4.18	9	ppt-miR1223h, ppt-miR1223i, cre-miR1165-5p, esi-miR3452-3p, ahy-miR3521, mtr-miR2592bn-3p, ath-miR5666, gra-miR8714, gra-miR8759
GT-1 At1g13450 T6J4.18	9	ath-miR156c-3p, aly-miR156c-3p, hme-miR-71, hme-miR-6305-5p, bdi-miR156f-3p, cpa-miR8138, tae-miR397-5p, bra-miR156c-3p, bra-miR156g-3p
	9	ath-miR775, aly-miR395e-5p, aly-miR395g-5p, mdm-miR319c, bra-miR395d-5p, bra-miR395b-5p, bra-miR395c-5p, bra-miR395a-5p, ata-miR399b-5p
CYP18-2 At2g36130 F9C22.6	9	ath-miR447c-3p, osa-miR1851, osa-miR2867-3p, osa-miR2926, bdi-miR5173-3p, cme-miR169q, cme-miR169s, cme-miR169p, bdi-miR7743-3p
CYP18-2 At2g36130 F9C22.6	9	ath-miR447c-3p, osa-miR1851, osa-miR2867-3p, osa-miR2926, bdi-miR5173-3p, cme-miR169q, cme-miR169s, cme-miR169p, bdi-miR7743-3p
SDR1 At3g61220 T20K12.120	9	aly-miR851-5p, ahy-miR3513-3p, ath-miR5648-5p, mtr-miR5751, hme-miR-13a, stu-miR8032b-3p, stu-miR8032f-3p, stu-miR8032g-3p, sly-miR482d-5p
Os04g0530600 LOC_Os04g44830 OsJ_15561 OSJNBa0074L08.22 OSJNBa0081C01.10	9	ath-miR416, osa-miR2928, esi-miR3454g-3p, esi-miR3454d-3p, mtr-miR5204, gma-miR5778, ptc-miR482c-3p, esi-miR8622a, esi-miR8622b
Os04g0530600 LOC_Os04g44830 OsJ_15561 OSJNBa0074L08.22 OSJNBa0081C01.10	9	mtr-miR166b, aqu-miR-2019-5p, sbi-miR166k, mtr-miR2633, aqc-miR166c, gma-miR166h-3p, bdi-miR166f, gma-miR166k, gma-miR166u
At5g22090 T6G21.200	9	ppt-miR1217-3p, osa-miR1435, osa-miR2093-5p, osa-miR2097-3p, sbi-miR1435a, aly-miR3435-3p, bdi-miR5069, lja-miR7529, sly-miR9469-5p
SAT2 Os03g0133900 LOC_Os03g04140 OJ1006F06.16	9	aly-miR851-3p, rgl-miR5137, mtr-miR5215, mtr-miR5266, bdi-miR7749-5p, bdi-miR7754-5p, stu-miR1886h, stu-miR1886i-3p, gra-miR8771d
IBH1 BHLH158 At2g43060 MFL8.8	9	bdi-miR1127, mtr-miR2647a, mtr-miR2647b, mtr-miR2647c, pde-miR3704a, cme-miR399g, sbi-miR5568e-3p, sbi-miR6233-5p, gra-miR8754
IBH1 H0112G12.1 OsI_17766 OSIGBa0132E09-OSIGBa0108L24.23	9	ppt-miR1219a, ppt-miR1219b, ppt-miR1219c, ppt-miR1219d, ath-miR857, aly-miR857-3p, esi-miR3452-3p, bdi-miR5172-3p, bdi-miR7771-3p
CDSP32 Os07g0476900 LOC_Os07g29410 OsJ_24223 P0640E12.112	9	zma-miR172d-5p, zma-miR172b-5p, zma-miR172c-5p, tae-miR1139, csi-miR172a-5p, bdi-miR172a-5p, ptc-miR6450b, lja-miR7528, ata-miR172b-5p
At1g67325 F1N21_14	9	ath-miR408-5p, ptc-miR408-5p, osa-miR2104, aly-miR408-5p, ahy-miR408-5p, gma-miR408b-5p, mtr-miR408-5p, hbr-miR408b, cpa-miR8143
At1g19860 F6F9.9	9	mtr-miR2656a, mtr-miR2656b, tae-miR5086, bdi-miR159a-5p, gma-miR1512b, mtr-miR5558-3p, mtr-miR2656c, mtr-miR2656d, mtr-miR2656e
ROPGEF14 At1g31650 F27M3.15	9	mtr-miR395h, smo-miR1107, aly-miR841, stu-miR482d-3p, sly-miR482b, bdi-miR7712-5p, bdi-miR7777-5p.1, gra-miR8787, gra-miR8718
CSLE6 Os09g0478300 Os09g0478200 LOC_Os09g30130 P0556A05.32	9	ptc-miR478d, osa-miR5147, mtr-miR4414b, osa-miR5505, gma-miR5667-3p, ptc-miR6424, mtr-miR7701-5p, bdi-miR7777-3p.1, ata-miR398g-5p
PCMP-H51 CRR28 At1g59720 F23H11.3 T30E16.32	9	cre-miR914, aqc-miR408, pab-miR3699, gma-miR4368b, sbi-miR5564a, nta-miR6145c, mtr-miR7699-3p, bdi-miR159b-5p.2, bdi-miR9487
DYW9 PCMP-H9 At4g30700 T10C21.50	9	zma-miR319b-5p, zma-miR319d-5p, osa-miR2102-5p, mtr-miR2654, vvi-miR3637-5p, bdi-miR7734-5p, bdi-miR7734-3p, gra-miR7492n, tae-miR396-5p
CID9 At3g14450 MOA2.5	9	ppt-miR1220a, ppt-miR1220b, cre-miR919.2, osa-miR1846d-3p, gma-miR4397-5p, gma-miR408a-5p, gma-miR408c-5p, sbi-miR5565f, ath-miR8171
ROSY1 At2g16005	9	ptc-miR1446a, ptc-miR1446b, ptc-miR1446c, ptc-miR1446d, ptc-miR1446e, gma-miR1519, gma-miR4416b, gra-miR7484l, hbr-miR9387
ROSY1 At2g16005	9	ptc-miR160g, cre-miR911, pta-miR950a, pta-miR950b, vvi-miR169y, aqc-miR160a, tcc-miR160c, cca-miR160a, pde-miR950
PIGA SETH2 At3g45100 T14D3.40	9	hme-miR-2797, bdi-miR7741-5p.2, stu-miR172c-5p, gra-miR8743c, gra-miR8743d, gra-miR8743e, gra-miR8743a, bra-miR9555a-5p, bra-miR9567-5p
CDC5 MAC1 MYBCD5 At1g09770 F21M12.15	9	zma-miR171i-5p, ppt-miR1221-5p, cre-miR1160.2, mtr-miR2635, osa-miR2874, aly-miR860-5p, ptc-miR6451, esi-miR8623c, bra-miR860-5p
CYCU4-1 At2g44740 F16B22.23	9	ppt-miR897, pvu-miR159a.2, aly-miR823-5p, osa-miR5517, hme-miR-13b, bdi-miR7781-5p, stu-miR7986, cpa-miR8143, bra-miR172c-5p
AtMg00030	9	ppt-miR903, cre-miR912, ppt-miR1048-5p, gma-miR1528, osa-miR2923, aly-miR3437-5p, far-miR1134, gra-miR8660, gra-miR8748
4CLL4 Os03g0132000 LOC_Os03g04000 OsJ_09299	9	mtr-miR398a-5p, gma-miR159b-3p, gma-miR159c, mtr-miR2199, mtr-miR159b, gma-miR159f-3p, bra-miR400-3p, ath-miR1886.1, ata-miR398f-5p
PAB2 At4g34110 F28A23.130	9	ath-miR865-3p, mtr-miR2592a-5p, vvi-miR3639-3p, mtr-miR5272f, osa-miR5338, gma-miR5373, pti-miR5481, gra-miR530b, gra-miR477
PAB2 At4g34110 F28A23.130	9	osa-miR1438, ath-miR5018, bdi-miR5184, osa-miR5337a, mtr-miR5558-3p, ptc-miR6427-5p, stu-miR4376-3p, gra-miR8668, ata-miR2275c-5p
[truncated: 3,292 more rows]

## Sheet: MANGO GINGER
Gene names		miRNAs
[truncated: 4,485 more rows]
