# Supplementary figures and images for: Unravelling the Differential Expression of Potential microRNAs&nbsp;in Bacterial Wilt-resistant and Susceptible Ginger Species
Source: Research Square preprint supplement (doi:10.21203/rs.3.rs-115945/v1), 2020-12-04

Supplementary Figure 1


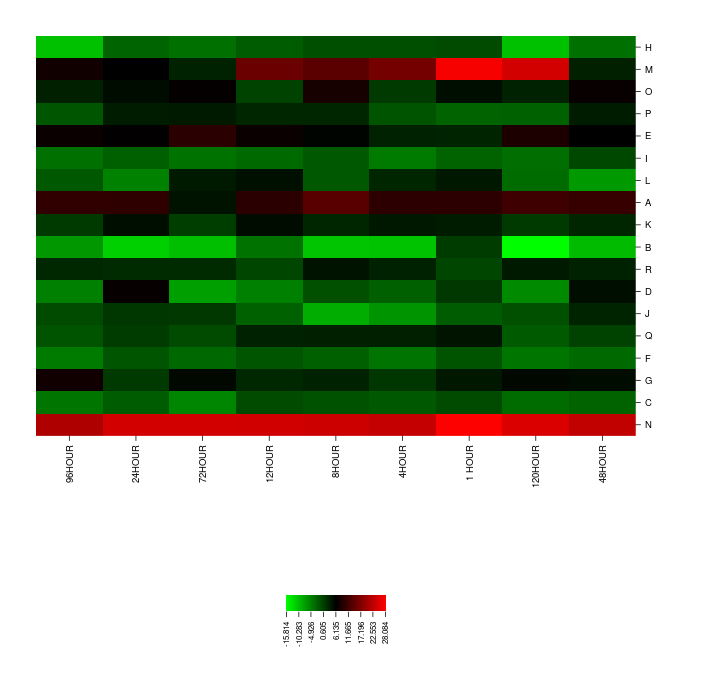


Supplementary Figure 2
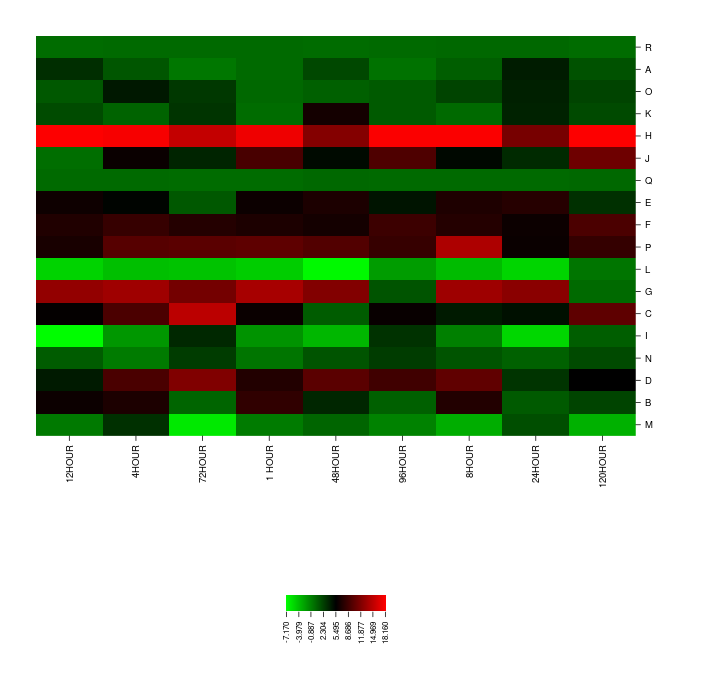


Supplementary Figure 3


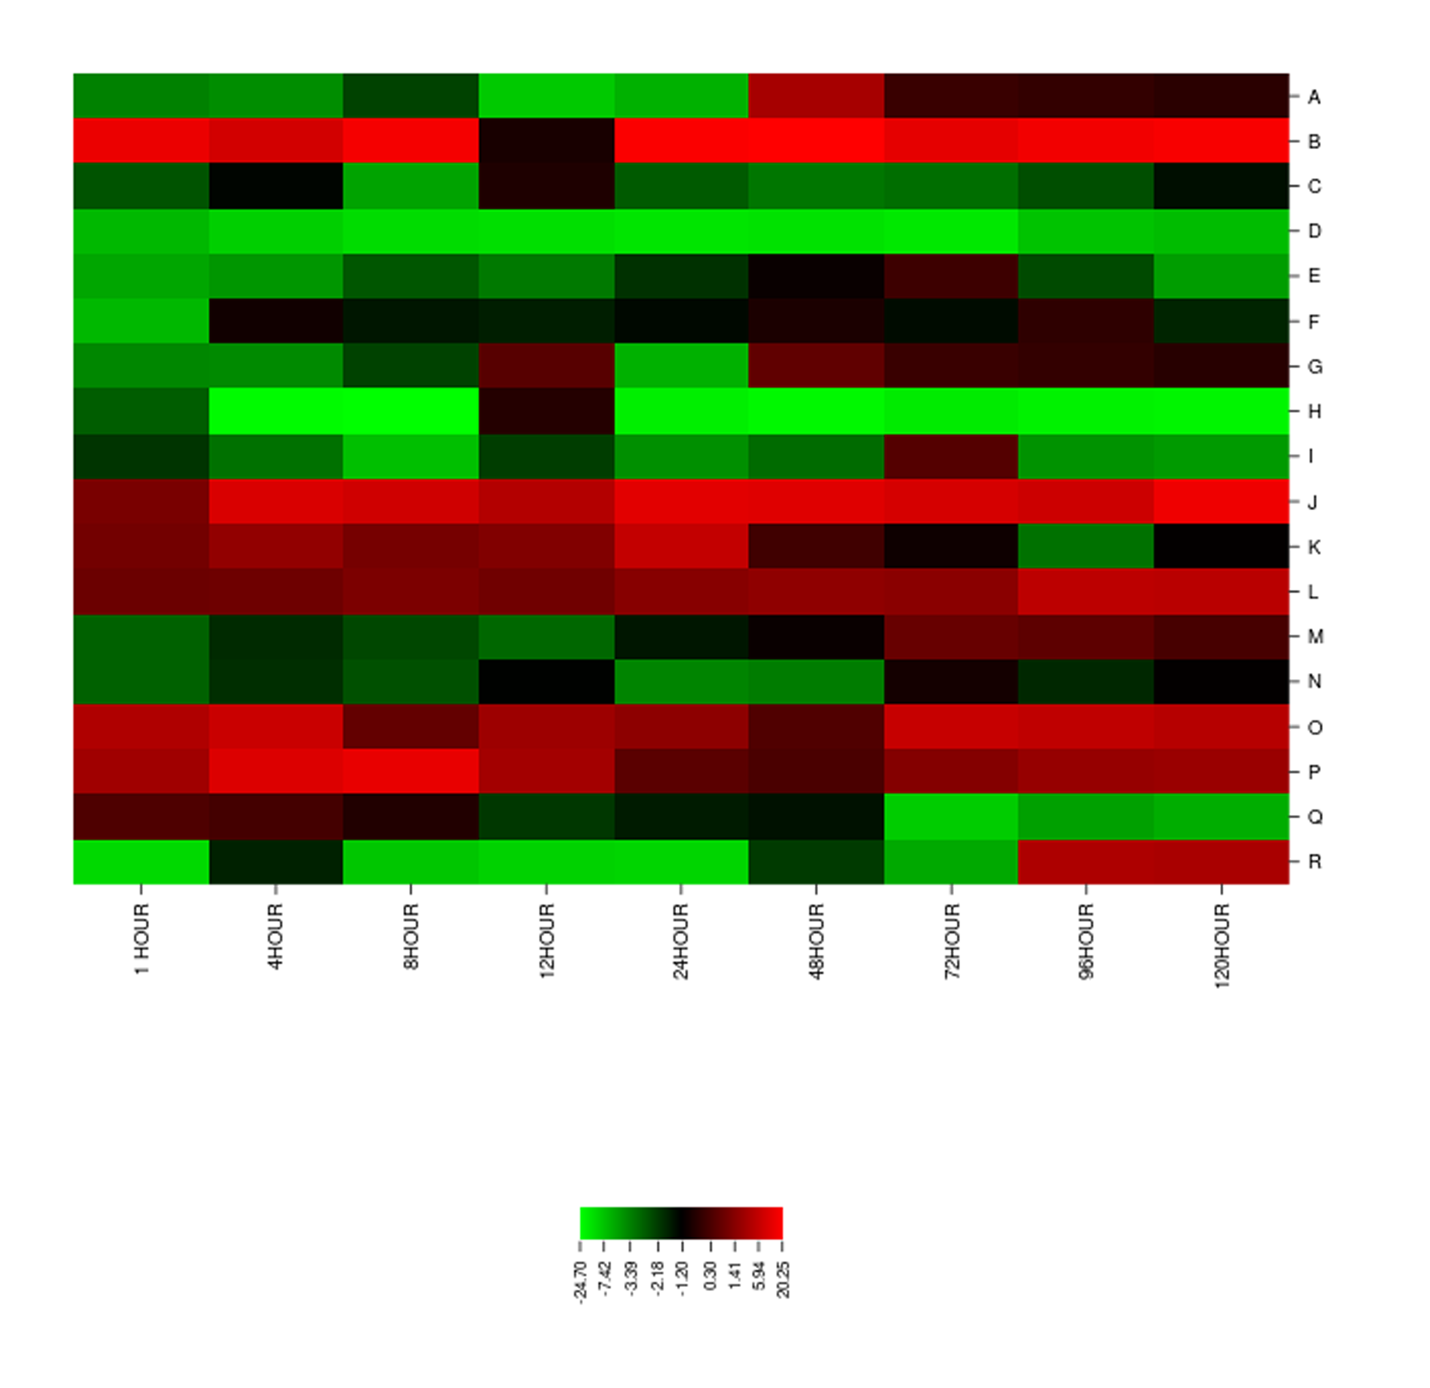


Supplementary Figure 4
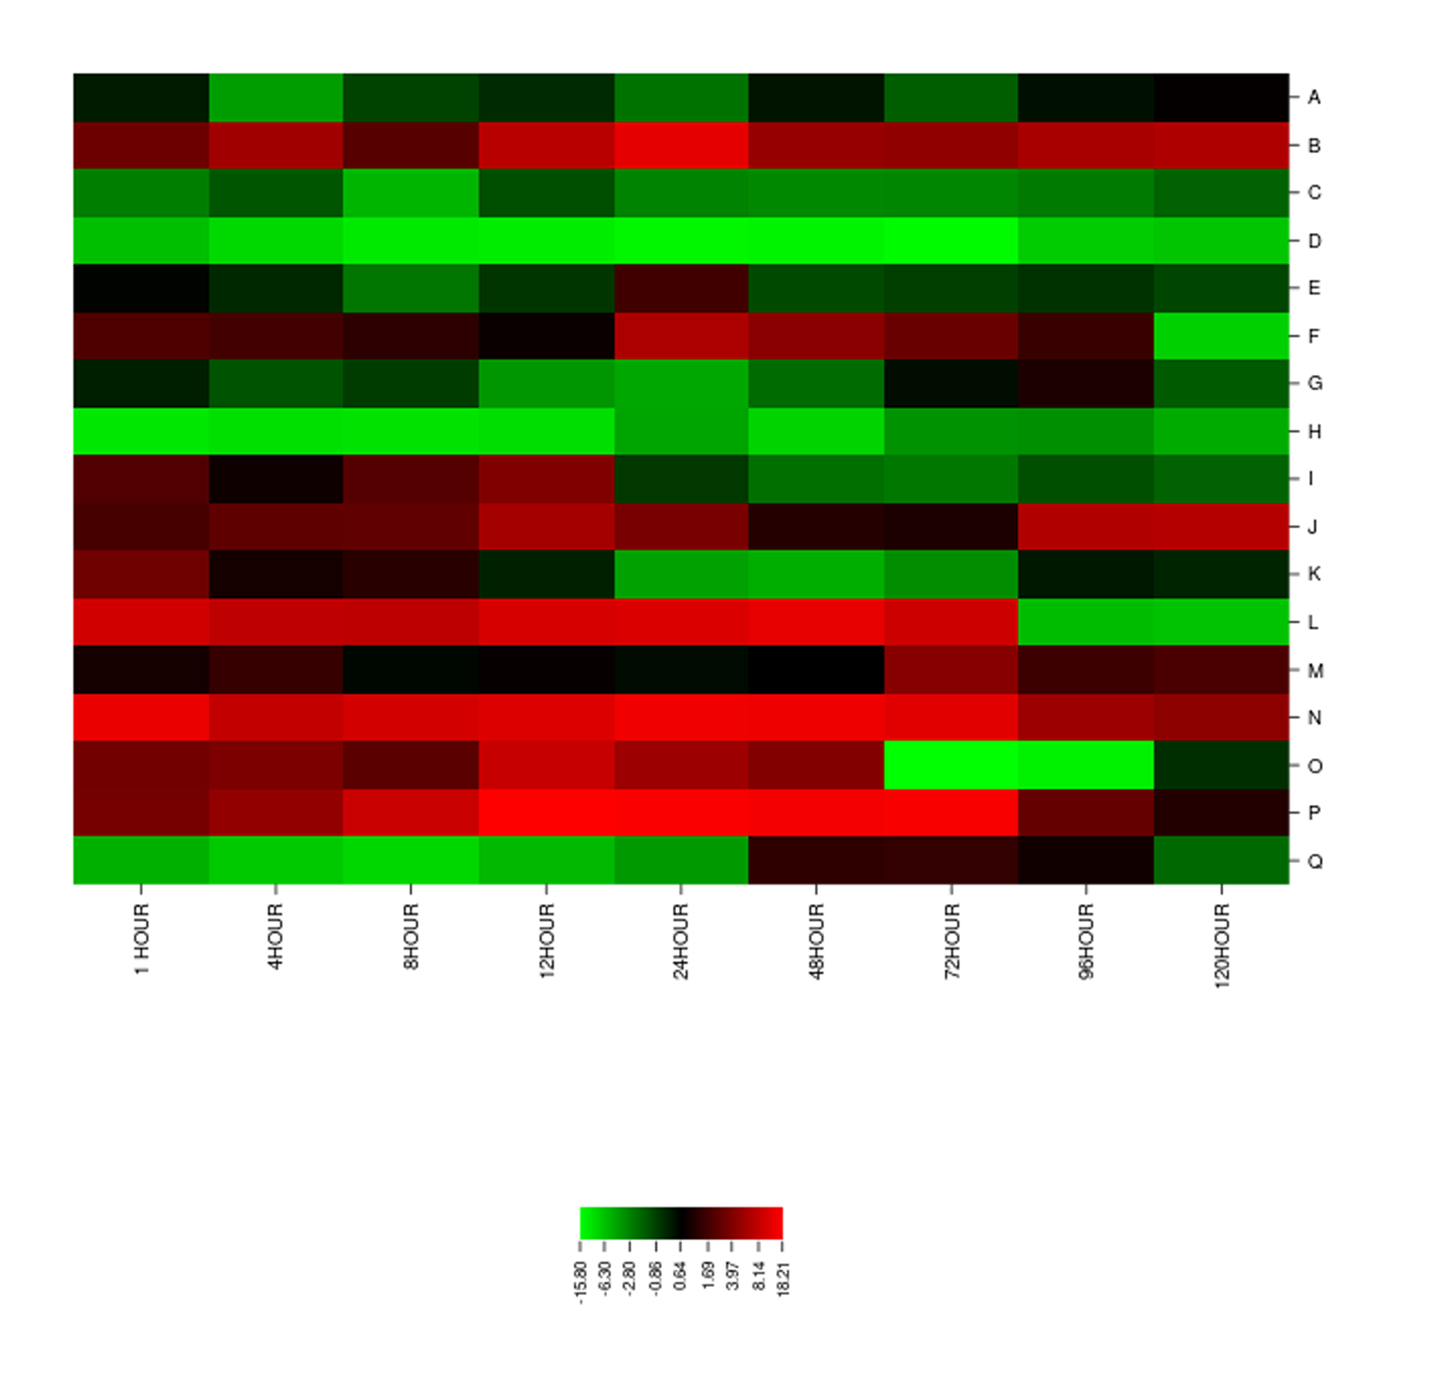

Supplement: Supplementary file 2 [file e53edffef5f798ec4005e462.docx]
